# Supplementary material for: Influence of hydropower stations on the water microbiota in the downstream of Jinsha River, China
Source: PeerJ. 2020 Jul 16;8:e9500. doi: 10.7717/peerj.9500 (PMC7369022; doi:10.7717/peerj.9500)
Supplement: Supplemental Information 2 [file peerj-08-9500-s002.xlsx]

## Sheet: Sheet1
Table S2. Dominant OTUs detected from the river water microbiota.
OTUID	taxonomy	S1-1	S1-2	S1-3	S2-1	S2-2	S2-3	S3-1	S3-2	S3-3	S4-1	S4-2	S4-3	S5-1	S5-2	S5-3	S6-1	S6-2	S6-3	S7-1	S7-2	S7-3	S8-1	S8-2	S8-3	S9-1	S9-2	S9-3	S10-1	S10-2	S10-3	S11-1	S11-2	S11-3	S12-1	S12-2	S12-3	S13-1	S13-2	S13-3	S14-1	S14-2	S14-3	S15-1	S15-2	S15-3	S16-1	S16-2	S16-3
OTU_14448	k__Bacteria; p__Proteobacteria; c__Betaproteobacteria; o__Burkholderiales; f__Comamonadaceae; g__Limnohabitans; s__	0.0467643	0.0459997	0.0393995	0.0123551	0.0094575	0.00921603	0.00639891	0.00635866	0.00587572	0.0732051	0.0682952	0.058717	0.0423777	0.0174259	0.0274469	0.0056745	0.00595621	0.011027	0.0152125	0.0258773	0.0183918	0.0738892	0.0711929	0.0764649	0.0232212	0.0204041	0.0211687	0.0156954	0.0175064	0.0229395	0.019237	0.0257164	0.0235029	0.0109063	0.0079282	0.00712331	0.00857212	0.00969897	0.024831	0.0434643	0.0408886	0.0449936	0.00700258	0.00297811	0.00390373	0.070227	0.0806906	0.0541291
OTU_15284	k__Bacteria; p__Proteobacteria; c__Betaproteobacteria; o__Burkholderiales; f__Comamonadaceae; g__Rhodoferax; s__	0.02302	0.0228992	0.0233419	0.0146491	0.0107051	0.0124759	0.0120734	0.0117514	0.0100209	0.0152527	0.0191565	0.0140052	0.0279701	0.0159771	0.0239456	0.00917579	0.0104636	0.0109466	0.0114295	0.0180699	0.0175869	0.0399227	0.037508	0.0426594	0.0151722	0.0140052	0.0132003	0.0100612	0.0140856	0.0126368	0.015132	0.0182308	0.0111478	0.0132003	0.0104636	0.0121137	0.00708307	0.00619768	0.01316	0.0257164	0.0245493	0.0243883	0.00752576	0.00841114	0.00957824	0.0932469	0.0941323	0.0758612
OTU_20083	k__Bacteria; p__Proteobacteria; c__Betaproteobacteria; o__Burkholderiales; f__Comamonadaceae; g__Limnohabitans; s__	0.0240261	0.0316726	0.0282518	0.00869285	0.00651964	0.0072038	0.00499034	0.00442692	0.00406471	0.0433435	0.0540084	0.0396008	0.0295798	0.0109868	0.0173455	0.00289762	0.00402447	0.0079282	0.0109868	0.0202833	0.0117917	0.0481729	0.0458387	0.0652366	0.0129185	0.0105844	0.0153332	0.011027	0.0111478	0.0144881	0.0121137	0.0165406	0.0178686	0.00680135	0.0049501	0.00434643	0.00434643	0.00623793	0.0177479	0.0323165	0.026481	0.035858	0.00559401	0.00350129	0.003783	0.0502254	0.0545316	0.0407276
OTU_18384	k__Bacteria; p__Actinobacteria; c__Actinobacteria; o__Actinomycetales; f__ACK-M1; g__; s__	0.0153332	0.0259176	0.0144478	0.0350531	0.0310287	0.0355763	0.0426191	0.0394398	0.0244688	0.0022537	0.0034208	0.00201223	0.0311091	0.0193175	0.0255554	0.0424984	0.0291372	0.0227382	0.00450741	0.00587572	0.00551352	0.00664037	0.00599646	0.0053123	0.000804894	0.000643915	0.00112685	0.0245493	0.0194382	0.0242273	0.0318335	0.039802	0.0266017	0.0254346	0.031914	0.0330409	0.018593	0.0132807	0.0164601	0.0146893	0.0106648	0.0164601	0.0102222	0.0245493	0.0157357	0.00647939	0.0103831	0.00651964
OTU_20186	k__Bacteria; p__Actinobacteria; c__Actinobacteria; o__Actinomycetales; f__ACK-M1; g__; s__	0.00913554	0.00893432	0.00885383	0.0137637	0.00949775	0.0109063	0.0220943	0.0214907	0.0104234	0.0515132	0.0850773	0.0556182	0.0143271	0.00410496	0.00990019	0.0177479	0.011188	0.0101417	0.0011671	0.00354153	0.00293786	0.00374276	0.00301835	0.00362202	0.00273664	0.00301835	0.00370251	0.00825016	0.00772698	0.0103831	0.0198809	0.0236639	0.0165406	0.0148905	0.0207663	0.0183918	0.0121539	0.0094575	0.00820992	0.0175869	0.0132807	0.0206858	0.0106648	0.0297006	0.0251127	0.00825016	0.0108258	0.0101014
OTU_17781	k__Bacteria; p__Actinobacteria; c__Actinobacteria; o__Actinomycetales; f__ACK-M1; g__; s__	0.0103429	0.0103429	0.00800869	0.0206858	0.0140052	0.0173455	0.0288152	0.0284127	0.0161784	0.0246297	0.0350934	0.0251529	0.0181101	0.00619768	0.015293	0.0279298	0.0198004	0.0147698	0.00511108	0.00825016	0.00784771	0.00281713	0.00217321	0.00249517	0.00205248	0.00140856	0.00205248	0.0155344	0.0125966	0.018915	0.0274066	0.0321153	0.0206455	0.0244688	0.0260383	0.0290567	0.00889408	0.00676111	0.00627817	0.00716355	0.00547328	0.00752576	0.00563426	0.0122344	0.00921603	0.003783	0.0056745	0.0041452
OTU_18447	k__Bacteria; p__Actinobacteria; c__Actinobacteria; o__Actinomycetales; f__ACK-M1; g__; s__	0.00853187	0.00985995	0.00796845	0.0221748	0.0162991	0.0173857	0.0255554	0.0265212	0.015132	0.000965873	0.00148905	0.00132807	0.0213699	0.00776722	0.016782	0.0274871	0.0204845	0.0149308	0.00169028	0.00325982	0.00285737	0.00317933	0.00285737	0.00354153	0.00068416	0.000643915	0.00068416	0.0145686	0.0135625	0.020887	0.0286542	0.0324372	0.0202028	0.0204041	0.0244285	0.0261188	0.0156552	0.0138844	0.0131198	0.0128381	0.00977946	0.0176674	0.0118319	0.0285737	0.0210882	0.00748551	0.0128381	0.00913554
OTU_18933	k__Bacteria; p__Actinobacteria; c__Actinobacteria; o__Actinomycetales; f__ACK-M1; g__; s__	0.015454	0.0146088	0.0122746	0.0118319	0.00732453	0.00865261	0.0217724	0.0218529	0.0128783	0.000764649	0.000965873	0.000845138	0.0138039	0.00394398	0.00913554	0.0179894	0.0128381	0.0094575	0.00100612	0.00201223	0.00156954	0.00297811	0.00309884	0.00293786	0.000563426	0.000321958	0.000523181	0.0106246	0.00627817	0.0112685	0.0185126	0.0189552	0.0114697	0.0202833	0.0247102	0.0199614	0.022698	0.0189955	0.0173857	0.0171442	0.0140454	0.0209675	0.0138442	0.0340068	0.0243078	0.00877334	0.0125161	0.00998068
OTU_18293	k__Bacteria; p__Actinobacteria; c__Actinobacteria; o__Actinomycetales; f__ACK-M1; g__; s__	0.0072038	0.0156552	0.0102624	0.0224163	0.0181101	0.0235029	0.0302238	0.0250724	0.0160979	0.00140856	0.00205248	0.00120734	0.0218529	0.00965873	0.0173052	0.0248712	0.0159771	0.0149308	0.00289762	0.00474887	0.00350129	0.00382325	0.00382325	0.00418545	0.000764649	0.000362202	0.000281713	0.0158564	0.0132003	0.0127173	0.0198809	0.0257968	0.0162991	0.0194784	0.0221748	0.0221346	0.00985995	0.00752576	0.0112685	0.0100612	0.00680135	0.0124759	0.00595621	0.0144076	0.0111478	0.00386349	0.00639891	0.00434643
OTU_19294	k__Bacteria; p__Cyanobacteria; c__Chloroplast; o__Stramenopiles; f__; g__; s__	0.0379105	0.0146088	0.0332421	0.0249115	0.0239053	0.0271249	0.0375885	0.0321153	0.0294591	0.000885383	0.000885383	0.00140856	0.00748551	0.00466838	0.0119929	0.0208065	0.0262798	0.0218126	0.000120734	0.00181101	0.000160979	0.0128381	0.0156552	0.0108661	0.000442692	0.000362202	0.000643915	0.00965873	0.00623793	0.00346104	0.00857212	0.0083709	0.00861236	0.0125966	0.00857212	0.0124356	0.0183113	0.0121137	0.0221748	0.0245895	0.0248712	0.0229395	0.0123954	0.00406471	0.00511108	0.00124759	0.00132807	0.00108661
OTU_15089	k__Bacteria; p__Proteobacteria; c__Betaproteobacteria; o__Burkholderiales; f__Comamonadaceae; g__Limnohabitans; s__	0.00973921	0.0116307	0.0103026	0.00599646	0.00563426	0.00547328	0.00446716	0.00422569	0.00350129	0.00651964	0.0109063	0.00825016	0.0186333	0.00829041	0.0142869	0.00354153	0.00422569	0.00398422	0.007566	0.0137637	0.0104636	0.0211285	0.0229395	0.0296603	0.00615744	0.0068416	0.00849163	0.00523181	0.00688184	0.00571475	0.0072038	0.00889408	0.0053123	0.00680135	0.00631842	0.00660013	0.00366227	0.00350129	0.00639891	0.0158162	0.0153735	0.0184321	0.00434643	0.00402447	0.00579524	0.0591597	0.0552962	0.0452753
OTU_20165	k__Bacteria; p__Bacteroidetes; c__Cytophagia; o__Cytophagales; f__Cyclobacteriaceae; g__; s__	0.0161381	0.00784771	0.0111075	0.00764649	0.00587572	0.0103026	0.01316	0.0135625	0.0114295	0.0252334	0.0203638	0.0263603	0.0134417	0.00370251	0.0141259	0.0194784	0.0175467	0.0155344	0.000442692	0.00446716	0.00156954	0.00177077	0.00253542	0.00233419	0.000764649	0.00120734	0.000402447	0.0124759	0.00740502	0.0072038	0.0135222	0.0121539	0.0155344	0.0105441	0.00808918	0.00957824	0.00877334	0.00583548	0.00571475	0.0251127	0.0339665	0.0220138	0.0101014	0.0128381	0.0105039	0.00796845	0.00841114	0.0068416
OTU_18407	k__Bacteria; p__Actinobacteria; c__Actinobacteria; o__Actinomycetales; f__ACK-M1; g__; s__	0.00499034	0.00692209	0.00712331	0.0144478	0.00977946	0.0115502	0.0191967	0.0178686	0.0106648	0.0164601	0.0236639	0.0145686	0.01481	0.00503059	0.00985995	0.0158564	0.011671	0.011671	0.00350129	0.00651964	0.00672086	0.00120734	0.00132807	0.0018915	0.00100612	0.0011671	0.00169028	0.0119929	0.00969897	0.00957824	0.021209	0.0234224	0.0149308	0.0168223	0.0219736	0.0181504	0.00442692	0.00402447	0.0041452	0.00486961	0.00325982	0.00639891	0.00330006	0.00820992	0.00784771	0.00309884	0.00366227	0.00265615
OTU_20266	k__Bacteria; p__Bacteroidetes; c__Cytophagia; o__Cytophagales; f__Cyclobacteriaceae; g__; s__	0.00833065	0.00833065	0.0087331	0.00853187	0.00651964	0.00913554	0.0119124	0.0130795	0.0114697	0.013482	0.0152125	0.0191162	0.0138039	0.00370251	0.0141661	0.0150113	0.0134417	0.0163393	0.000563426	0.00422569	0.00169028	0.00148905	0.00165003	0.00181101	0.000523181	0.000925628	0.000563426	0.0122344	0.0060367	0.0056745	0.0133612	0.0117917	0.0147296	0.0111075	0.00917579	0.011349	0.00454765	0.00450741	0.00583548	0.0260383	0.0279298	0.0252334	0.00925628	0.0121941	0.0101819	0.0079282	0.00829041	0.00748551
OTU_20196	k__Bacteria; p__Bacteroidetes; c__[Saprospirae]; o__[Saprospirales]; f__Chitinophagaceae; g__Sediminibacterium; s__	0.0100612	0.0101819	0.00833065	0.0120734	0.00973921	0.0105441	0.0158162	0.0140052	0.01481	0.00655988	0.00700258	0.00579524	0.0115905	0.0068416	0.0137234	0.0165808	0.012999	0.015454	0.00144881	0.00547328	0.00386349	0.00607695	0.00539279	0.00430618	0.00148905	0.00221346	0.00140856	0.0111075	0.00941726	0.0114295	0.016943	0.0203236	0.0191162	0.0168625	0.0136832	0.017104	0.00366227	0.00309884	0.00330006	0.00627817	0.00579524	0.00470863	0.00402447	0.00591597	0.00430618	0.0026159	0.00394398	0.00273664
OTU_19935	k__Bacteria; p__Actinobacteria; c__Actinobacteria; o__Actinomycetales; f__ACK-M1; g__; s__	0.00418545	0.00796845	0.0053123	0.0152527	0.0098197	0.0124759	0.0177479	0.0165406	0.0109868	0.00060367	0.00104636	0.000724404	0.015293	0.00446716	0.0111075	0.0173052	0.0107453	0.0110673	0.00104636	0.00253542	0.00169028	0.00181101	0.0026159	0.00245493	0.000362202	0.000402447	0.000563426	0.0107453	0.0098197	0.0109466	0.0197199	0.0202833	0.0141259	0.0134417	0.0174662	0.0168625	0.00853187	0.00869285	0.00816967	0.00929652	0.00772698	0.012999	0.00724404	0.0179491	0.0156954	0.00563426	0.0079282	0.00627817
OTU_17	k__Bacteria; p__Proteobacteria; c__Gammaproteobacteria; o__Pseudomonadales; f__Moraxellaceae; g__Acinetobacter; s__	0.00144881	0.00156954	0.00100612	0.00249517	0.00362202	0.0026159	0.00100612	0.00060367	0.000885383	0.000845138	0.00060367	0.00068416	0.00422569	0.169873	0.0404459	0.000925628	0.00136832	0.0011671	0.0034208	0.00124759	0.0916774	0.00120734	0.00148905	0.00112685	0.0107051	0.0171442	0.0121137	0.0418142	0.00169028	0.00265615	0.000724404	0.00221346	0.00229395	0.0049501	0.00503059	0.00716355	0.00221346	0.00205248	0.00169028	0.00181101	0.00197199	0.00221346	0.0087331	0.00104636	0.00112685	0.00450741	0.00148905	0.0121941
OTU_5	k__Bacteria; p__Bacteroidetes; c__Flavobacteriia; o__Flavobacteriales; f__Flavobacteriaceae; g__Flavobacterium; s__succinicans	0.00503059	0.0018915	0.00386349	0.00181101	0.00132807	0.00169028	0.00169028	0.00100612	0.00108661	0.00217321	0.00144881	0.0015293	0.00486961	0.00293786	0.00511108	0.00221346	0.00197199	0.00237444	0.0022537	0.00382325	0.00547328	0.0575499	0.054773	0.0521571	0.0072038	0.00994044	0.00752576	0.00438667	0.00165003	0.00317933	0.00458789	0.00619768	0.00265615	0.00458789	0.00277688	0.00454765	0.00169028	0.00144881	0.00128783	0.00330006	0.00297811	0.00237444	0.00998068	0.0136027	0.0125161	0.0285737	0.0215712	0.0167418
OTU_10	k__Bacteria; p__Proteobacteria; c__Alphaproteobacteria; o__Sphingomonadales; f__; g__; s__	0.00833065	0.0079282	0.00736478	0.0098197	0.0163796	0.0114295	0.00579524	0.00623793	0.0140454	0.00358178	0.00233419	0.00317933	0.00841114	0.0100209	0.00953799	0.00953799	0.0115905	0.00961848	0.0196797	0.0245493	0.0167418	0.00825016	0.00905505	0.00857212	0.0127576	0.0130393	0.0112685	0.0104636	0.0126368	0.013321	0.00841114	0.0162589	0.0163393	0.00647939	0.0094575	0.00639891	0.00297811	0.00309884	0.00285737	0.00458789	0.00382325	0.00370251	0.00136832	0.00160979	0.00148905	0.00257566	0.00205248	0.00257566
OTU_16	k__Bacteria; p__Proteobacteria; c__Betaproteobacteria; o__Methylophilales; f__Methylophilaceae; g__; s__	0.00655988	0.00575499	0.00708307	0.0090953	0.00708307	0.0101417	0.0139649	0.0131198	0.0132405	0.00289762	0.00330006	0.00309884	0.0109466	0.00474887	0.00893432	0.0123149	0.00825016	0.00664037	0.00112685	0.00309884	0.00269639	0.00281713	0.0022537	0.0041452	0.000402447	0.000281713	0.000160979	0.00643915	0.00704282	0.00462814	0.0113892	0.011188	0.00865261	0.00905505	0.0120734	0.0150515	0.00833065	0.00788796	0.00833065	0.00724404	0.00651964	0.00724404	0.0060367	0.0154137	0.00977946	0.00289762	0.00406471	0.00350129
OTU_13425	k__Bacteria; p__Proteobacteria; c__Betaproteobacteria; o__Neisseriales; f__Neisseriaceae; g__Vogesella; s__	0.00334031	0.00132807	0.00120734	0.000402447	0.000442692	0.000362202	8.04894e-05	0.000120734	0.000362202	0.00060367	0.000965873	0.000885383	0.00804894	0.0152527	0.00060367	0.000281713	0.000160979	0.000402447	0.119205	0.0402447	0.114013	0.000724404	0.000402447	0.000563426	0.00068416	0.00297811	0.000402447	0.0101819	0.00205248	0.00136832	0.000241468	0.000563426	0.00060367	0.000482936	0.000321958	0.000201223	0.00169028	0.000925628	0.000804894	0.000643915	0.000523181	0.000281713	0.00136832	0.000362202	8.04894e-05	0.00953799	0.00692209	0.0385544
OTU_12922	k__Bacteria; p__Actinobacteria; c__Actinobacteria; o__Actinomycetales; f__ACK-M1; g__; s__	0.00627817	0.00881359	0.00885383	0.00712331	0.00454765	0.00575499	0.0127576	0.0127978	0.00627817	0.000160979	0.000643915	0.000281713	0.00933677	0.00237444	0.00668062	0.00965873	0.00627817	0.00651964	0.000442692	0.00173052	0.00060367	0.00177077	0.0015293	0.00201223	4.02447e-05	8.04894e-05	0.000241468	0.00595621	0.0049501	0.00470863	0.0116307	0.01151	0.00732453	0.00998068	0.015132	0.0137637	0.0113892	0.0098197	0.00949775	0.0108661	0.00869285	0.0136027	0.00841114	0.0197601	0.0173052	0.00511108	0.00660013	0.00635866
OTU_22	k__Bacteria; p__Actinobacteria; c__Actinobacteria; o__Actinomycetales; f__Micrococcaceae; g__Arthrobacter; s__psychrolactophilus	0.00128783	0.00120734	0.000804894	0.00140856	0.0015293	0.00120734	0.00156954	0.00128783	0.00140856	0.000845138	0.000724404	0.000804894	0.00193175	0.00249517	0.00177077	0.000885383	0.0015293	0.00112685	0.00140856	0.00108661	0.000764649	0.00100612	0.00100612	0.000764649	0.135584	0.0243078	0.134377	0.0141259	0.0106648	0.00535254	0.0030586	0.00289762	0.00185126	0.00165003	0.00197199	0.00257566	0.00201223	0.00156954	0.00205248	0.00068416	0.000804894	0.000764649	0.00136832	0.000885383	0.000885383	0.00104636	0.00100612	0.000643915
OTU_12	k__Bacteria; p__[Thermi]; c__Deinococci; o__Deinococcales; f__Deinococcaceae; g__Deinococcus; s__	0.00112685	0.0015293	0.00160979	0.00100612	0.00193175	0.000845138	0.00144881	0.000885383	0.00144881	0.00165003	0.00104636	0.00132807	0.00241468	0.0146491	0.00334031	0.00100612	0.00173052	0.00293786	0.0501449	0.0210882	0.0125161	0.00173052	0.0018915	0.00108661	0.00571475	0.04769	0.00623793	0.00953799	0.0147296	0.00853187	0.00128783	0.00112685	0.00482936	0.00559401	0.0143674	0.00285737	0.0332019	0.0428606	0.0203638	0.00144881	0.00221346	0.000965873	0.00716355	0.00128783	0.000764649	0.00229395	0.00330006	0.00221346
OTU_15081	k__Bacteria; p__Proteobacteria; c__Betaproteobacteria; o__Burkholderiales; f__Comamonadaceae; g__Limnohabitans; s__	0.00543303	0.00712331	0.00551352	0.00499034	0.00527205	0.00535254	0.0049501	0.0053123	0.00386349	0.0101014	0.0119124	0.00921603	0.00503059	0.0126771	0.00772698	0.00382325	0.00406471	0.00350129	0.0109063	0.00985995	0.0212894	0.00350129	0.00257566	0.00394398	0.0022537	0.00366227	0.00209272	0.00519156	0.00724404	0.00317933	0.00543303	0.00651964	0.00382325	0.00394398	0.00338055	0.00418545	0.00406471	0.00325982	0.00599646	0.00591597	0.00696233	0.00579524	0.00325982	0.0041452	0.00354153	0.00639891	0.00672086	0.00708307
OTU_13665	k__Bacteria; p__Cyanobacteria; c__Chloroplast; o__Stramenopiles; f__; g__; s__	0.0159369	0.0104636	0.0195187	0.0144881	0.0145283	0.01481	0.022698	0.018915	0.0164601	0.00060367	0.000321958	0.000764649	0.00478912	0.0015293	0.00655988	0.0107051	0.0141661	0.0117917	0.000160979	0.00112685	0.000120734	0.00470863	0.00579524	0.00539279	0.000120734	0.000563426	0.000120734	0.00611719	0.00293786	0.0015293	0.00482936	0.0060367	0.00499034	0.00812943	0.00478912	0.00893432	0.00543303	0.00454765	0.00965873	0.00897457	0.00885383	0.00784771	0.00539279	0.00156954	0.00229395	0.000321958	0.000442692	0.000402447
OTU_25	k__Bacteria; p__Proteobacteria; c__Alphaproteobacteria; o__Rhizobiales; f__; g__; s__	0.0134417	0.0171845	0.0164601	0.00301835	0.00442692	0.00241468	0.00309884	0.00193175	0.00583548	0.011671	0.00776722	0.0135625	0.00317933	0.00490985	0.00466838	0.00253542	0.00543303	0.00591597	0.00893432	0.00740502	0.00253542	0.00543303	0.00507083	0.0034208	0.0193979	0.0181504	0.02302	0.00458789	0.00587572	0.00651964	0.00269639	0.00221346	0.00249517	0.00386349	0.00309884	0.00454765	0.00933677	0.00889408	0.0103026	0.00273664	0.00309884	0.0030586	0.00587572	0.00217321	0.00426594	0.00249517	0.00132807	0.00177077
OTU_14	k__Bacteria; p__Bacteroidetes; c__Cytophagia; o__Cytophagales; f__Cytophagaceae; g__; s__	0.00462814	0.00241468	0.00301835	0.00237444	0.00221346	0.00321958	0.00277688	0.00358178	0.00338055	0.00998068	0.00861236	0.00961848	0.00422569	0.00173052	0.00499034	0.00293786	0.00301835	0.0026159	0.000321958	0.000643915	0.000362202	0.0173455	0.0160174	0.0137234	0.000925628	0.00253542	0.00148905	0.00366227	0.00144881	0.0018915	0.00390373	0.00241468	0.00273664	0.00334031	0.00181101	0.00370251	0.000523181	0.000563426	0.000362202	0.00193175	0.00160979	0.000724404	0.000563426	0.000402447	0.000643915	0.00104636	0.000885383	0.000724404
OTU_20120	k__Bacteria; p__Bacteroidetes; c__[Saprospirae]; o__[Saprospirales]; f__Chitinophagaceae; g__Sediminibacterium; s__	0.00446716	0.00490985	0.00458789	0.00841114	0.00672086	0.00647939	0.0101014	0.00804894	0.00664037	0.00293786	0.00390373	0.00418545	0.00881359	0.00358178	0.0107856	0.00941726	0.00812943	0.0105844	0.000925628	0.00313909	0.00269639	0.00285737	0.00321958	0.00265615	0.000643915	0.000845138	0.000885383	0.00647939	0.00668062	0.00543303	0.0102624	0.0122344	0.0107856	0.0090953	0.00933677	0.0127576	0.0018915	0.00140856	0.00213297	0.00354153	0.00354153	0.00309884	0.0026159	0.00358178	0.00245493	0.00177077	0.00169028	0.00156954
OTU_31	k__Bacteria; p__Actinobacteria; c__Actinobacteria; o__Actinomycetales; f__; g__; s__	0.00325982	0.00865261	0.00764649	0.00833065	0.0127576	0.00933677	0.00599646	0.00523181	0.0109868	0.00249517	0.00205248	0.00229395	0.00804894	0.0105844	0.0104234	0.00732453	0.00676111	0.00523181	0.00233419	0.00249517	0.000804894	0.0022537	0.00253542	0.00201223	0.00233419	0.00156954	0.00217321	0.00631842	0.011349	0.00820992	0.00776722	0.00861236	0.00587572	0.00519156	0.00643915	0.00655988	0.00655988	0.00563426	0.00442692	0.00615744	0.00301835	0.00599646	0.00511108	0.00712331	0.00579524	0.00309884	0.00482936	0.00193175
OTU_7865	k__Bacteria; p__Bacteroidetes; c__Flavobacteriia; o__Flavobacteriales; f__Cryomorphaceae; g__Fluviicola; s__	0.00402447	0.00177077	0.00277688	0.00700258	0.00579524	0.00587572	0.00575499	0.00760625	0.00539279	0.000764649	0.000523181	0.000885383	0.00406471	0.00197199	0.00410496	0.0106648	0.0127576	0.0098197	0.000201223	0.000643915	0.000201223	0.00458789	0.0053123	0.00346104	0.000764649	0.000965873	0.000724404	0.00442692	0.00370251	0.00511108	0.00587572	0.00482936	0.00571475	0.00503059	0.00221346	0.00623793	0.00229395	0.00193175	0.00185126	0.00857212	0.013482	0.00816967	0.0148503	0.0117917	0.0177479	0.00994044	0.00732453	0.0100209
OTU_20541	k__Bacteria; p__Proteobacteria; c__Betaproteobacteria; o__Burkholderiales; f__Comamonadaceae; g__Rhodoferax; s__	0.00289762	0.00583548	0.00257566	0.00144881	0.00140856	0.00068416	0.000402447	0.000523181	0.000523181	0.00257566	0.00265615	0.00309884	0.00949775	0.0179089	0.00430618	0.00060367	0.000563426	0.0015293	0.0170637	0.0102222	0.00849163	0.00969897	0.00820992	0.00583548	0.00120734	0.0041452	0.00140856	0.00676111	0.0120332	0.00816967	0.00627817	0.00607695	0.00265615	0.00623793	0.00140856	0.00313909	0.00265615	0.00321958	0.00953799	0.00752576	0.00672086	0.00881359	0.00265615	0.00060367	0.000201223	0.0174662	0.0260786	0.0184723
OTU_14067	k__Bacteria; p__Proteobacteria; c__Alphaproteobacteria; o__Rhodobacterales; f__Rhodobacteraceae; g__Rhodobacter; s__	0.00253542	0.00297811	0.00193175	0.00732453	0.00499034	0.00330006	0.00112685	0.00112685	0.00148905	0.0105441	0.00579524	0.0110673	0.00269639	0.00358178	0.00579524	0.00108661	0.00245493	0.00201223	0.00833065	0.0145686	0.00611719	0.0030586	0.00269639	0.00241468	0.00611719	0.00478912	0.00446716	0.00193175	0.0022537	0.00289762	0.00233419	0.00301835	0.00587572	0.00140856	0.00177077	0.00120734	0.00313909	0.00209272	0.00289762	0.0150113	0.0103026	0.0117514	0.00740502	0.00780747	0.00869285	0.0157759	0.0142466	0.00857212
OTU_28	k__Bacteria; p__Proteobacteria; c__Gammaproteobacteria; o__Xanthomonadales; f__Xanthomonadaceae; g__; s__	0.00599646	0.00949775	0.00591597	0.00289762	0.00579524	0.00386349	0.00394398	0.0049501	0.00776722	0.000402447	0.000281713	0.000281713	0.00394398	0.00245493	0.00394398	0.00358178	0.00579524	0.00700258	0.0153735	0.0198004	0.0129588	0.00301835	0.00265615	0.00390373	0.0101417	0.0134417	0.00925628	0.00418545	0.0138442	0.00901481	0.00293786	0.0034208	0.00237444	0.00442692	0.0133612	0.00229395	0.00297811	0.00285737	0.00418545	0.00354153	0.00338055	0.00317933	0.00317933	0.00217321	0.00241468	0.00334031	0.00229395	0.00185126
OTU_19893	k__Bacteria; p__Bacteroidetes; c__Flavobacteriia; o__Flavobacteriales; f__Flavobacteriaceae; g__Flavobacterium; s__succinicans	0.00201223	0.00108661	0.00181101	0.000925628	0.000482936	0.00060367	0.000885383	0.000362202	0.000845138	0.000965873	0.000804894	0.00144881	0.00422569	0.00108661	0.00321958	0.00132807	0.00140856	0.000925628	0.00185126	0.00281713	0.00354153	0.0344495	0.0305055	0.0362202	0.00338055	0.003783	0.00515132	0.00346104	0.00100612	0.0015293	0.00297811	0.00297811	0.00140856	0.00253542	0.00177077	0.00334031	0.000965873	0.000724404	0.000764649	0.0018915	0.0018915	0.00165003	0.00655988	0.0083709	0.00994044	0.0175064	0.0138442	0.0118722
OTU_20546	k__Bacteria; p__Chlorobi; c__OPB56; o__; f__; g__; s__	0.00736478	0.00462814	0.00535254	0.00124759	0.00120734	0.00209272	0.00156954	0.00293786	0.00382325	0.000362202	0.000201223	0.000402447	0.00181101	0.00132807	0.00197199	0.00185126	0.00285737	0.00241468	0.000201223	0.00317933	0.000563426	0.0018915	0.00217321	0.00160979	8.04894e-05	4.02447e-05	4.02447e-05	0.00132807	0.000885383	0.00144881	0.00213297	0.00124759	0.00104636	0.00949775	0.00426594	0.00985995	0.0222956	0.0150918	0.0161381	0.0098197	0.00764649	0.00772698	0.0214102	0.0158967	0.0212894	0.00402447	0.00394398	0.00321958
OTU_19747	k__Bacteria; p__Bacteroidetes; c__[Saprospirae]; o__[Saprospirales]; f__Chitinophagaceae; g__Sediminibacterium; s__	0.00330006	0.00402447	0.00346104	0.00607695	0.00434643	0.00579524	0.00897457	0.00937701	0.00595621	0.00209272	0.00245493	0.00257566	0.0060367	0.00285737	0.00672086	0.00949775	0.00583548	0.00543303	0.00060367	0.00233419	0.00128783	0.00136832	0.00100612	0.00169028	0.000201223	0.000241468	0.000281713	0.00338055	0.00430618	0.00438667	0.00631842	0.00551352	0.00615744	0.00503059	0.00366227	0.00579524	0.00185126	0.0026159	0.00249517	0.00523181	0.00515132	0.00543303	0.00555377	0.00796845	0.00611719	0.00301835	0.00382325	0.00301835
OTU_20252	k__Bacteria; p__Bacteroidetes; c__Cytophagia; o__Cytophagales; f__Cyclobacteriaceae; g__; s__	0.00539279	0.00446716	0.00470863	0.00406471	0.00330006	0.00490985	0.00615744	0.00647939	0.0053123	0.00422569	0.00289762	0.00462814	0.00651964	0.00221346	0.00635866	0.0094575	0.00917579	0.00716355	0.000402447	0.00148905	0.000482936	0.000925628	0.000643915	0.00068416	0.000321958	0.000120734	0.000362202	0.00635866	0.00241468	0.00317933	0.00647939	0.00712331	0.00708307	0.00527205	0.00490985	0.00511108	0.00217321	0.0018915	0.0022537	0.00881359	0.0144881	0.0100209	0.00410496	0.00446716	0.00442692	0.00406471	0.00309884	0.00245493
OTU_19	k__Bacteria; p__Proteobacteria; c__Betaproteobacteria; o__Burkholderiales; f__Oxalobacteraceae; g__Polynucleobacter; s__	0.00462814	0.00651964	0.00595621	0.00462814	0.00499034	0.00857212	0.00744527	0.00841114	0.0094575	0.00104636	0.00104636	0.000885383	0.00752576	0.00587572	0.00804894	0.00732453	0.00627817	0.00458789	0.000965873	0.00193175	0.000965873	0.000885383	0.0011671	0.000885383	0.000241468	0.000764649	0.000362202	0.00559401	0.00595621	0.00458789	0.0056745	0.00474887	0.00551352	0.00507083	0.00587572	0.00571475	0.00253542	0.00362202	0.00422569	0.00647939	0.00672086	0.00579524	0.00486961	0.00740502	0.00808918	0.00277688	0.00325982	0.00354153
OTU_18	k__Bacteria; p__Cyanobacteria; c__Synechococcophycideae; o__Synechococcales; f__Synechococcaceae; g__Synechococcus; s__	0.011027	0.0130795	0.0132405	0.00422569	0.00442692	0.00450741	0.00269639	0.00297811	0.00869285	4.02447e-05	8.04894e-05	0	0.00173052	0.00543303	0.00362202	0.00430618	0.00651964	0.00635866	0.000402447	0.000281713	0.000120734	8.04894e-05	0.000160979	4.02447e-05	0.000120734	4.02447e-05	8.04894e-05	0.00370251	0.00317933	0.0034208	0.00289762	0.00136832	0.00325982	0.00293786	0.000724404	0.0026159	0.0159369	0.0132405	0.0140052	0.0102624	0.00973921	0.00917579	0.0188748	0.0083709	0.0137234	0.00321958	0.00217321	0.00165003
OTU_18408	k__Bacteria; p__Actinobacteria; c__Actinobacteria; o__Actinomycetales; f__ACK-M1; g__; s__	0.00398422	0.00511108	0.00410496	0.00438667	0.00265615	0.00309884	0.00776722	0.00865261	0.00515132	0.00265615	0.00434643	0.00309884	0.00563426	0.00205248	0.00438667	0.00853187	0.0053123	0.00503059	0.000160979	0.000321958	0.000281713	0.000442692	0.000281713	0.000201223	0.000482936	0.000281713	0.000523181	0.00559401	0.00334031	0.00458789	0.0102222	0.00985995	0.00696233	0.00748551	0.0094575	0.00885383	0.00289762	0.0034208	0.00257566	0.00406471	0.00293786	0.00519156	0.00398422	0.0068416	0.00696233	0.00245493	0.00229395	0.00201223
OTU_13034	k__Bacteria; p__Verrucomicrobia; c__Opitutae; o__[Cerasicoccales]; f__[Cerasicoccaceae]; g__; s__	0.00350129	0.00165003	0.00217321	0.0011671	0.000804894	0.00160979	0.00205248	0.0018915	0.00249517	0.0318738	0.0234627	0.0381117	0.00197199	0.00060367	0.00217321	0.00197199	0.00277688	0.00273664	8.04894e-05	0.00068416	8.04894e-05	0.00422569	0.00358178	0.00330006	0.000563426	0.00060367	0.000442692	0.00185126	0.000845138	0.000442692	0.00213297	0.00185126	0.0015293	0.00160979	0.000845138	0.00160979	0.00136832	0.00108661	0.00177077	0.000724404	0.00177077	0.00128783	0.00205248	0.00148905	0.00209272	0.000643915	0.000442692	0.000362202
OTU_32	k__Bacteria; p__Proteobacteria; c__Betaproteobacteria; o__Burkholderiales; f__Oxalobacteraceae; g__Polynucleobacter; s__cosmopolitanus	0.00132807	0.000764649	0.00108661	0.00108661	0.00112685	0.0011671	0.00100612	0.00104636	0.0011671	0.0261993	0.0303042	0.0278493	0.00233419	0.00173052	0.00213297	0.0011671	0.000442692	0.000724404	0.000482936	0.000885383	0.000643915	0.00523181	0.00611719	0.00788796	0.00217321	0.00330006	0.00241468	0.000965873	0.00120734	0.00104636	0.00169028	0.00160979	0.0011671	0.00160979	0.00120734	0.0011671	0.000281713	0.000321958	0.000402447	0.000925628	0.000804894	0.00068416	0.000321958	0.000120734	0.00060367	0.000965873	0.0011671	0.00165003
OTU_29	k__Bacteria; p__Bacteroidetes; c__Flavobacteriia; o__Flavobacteriales; f__Flavobacteriaceae; g__Flavobacterium; s__	0.000523181	0.000362202	0.000442692	0.00973921	0.00672086	0.00994044	0.00571475	0.00523181	0.00454765	0.00458789	0.00366227	0.00426594	0.00555377	0.00462814	0.00547328	0.00672086	0.00668062	0.00563426	0.00470863	0.00551352	0.0136027	0.00913554	0.00849163	0.00820992	0.00350129	0.00181101	0.00229395	0.00410496	0.00301835	0.00338055	0.00507083	0.00655988	0.00374276	0.00390373	0.00406471	0.00515132	0.00197199	0.00136832	0.00144881	0.00253542	0.00474887	0.00334031	0.00330006	0.00229395	0.0034208	0.00193175	0.00181101	0.0018915
OTU_24	k__Bacteria; p__Cyanobacteria; c__Chloroplast; o__Cryptophyta; f__; g__; s__	0.00619768	0.00362202	0.0060367	0.0041452	0.00346104	0.00563426	0.00390373	0.00394398	0.00627817	0.000523181	0.000160979	0.00068416	0.00249517	0.00100612	0.00330006	0.00744527	0.00800869	0.00599646	0.000120734	0.000241468	0.000201223	0.0018915	0.0018915	0.00148905	0.000321958	0.000201223	0.000362202	0.00470863	0.00362202	0.00309884	0.00233419	0.00173052	0.000482936	0.00209272	0.000845138	0.0030586	0.00338055	0.00229395	0.00309884	0.011027	0.0182308	0.0164198	0.0142869	0.0132405	0.0163393	0.00406471	0.00627817	0.00611719
OTU_20551	k__Bacteria; p__Proteobacteria; c__Betaproteobacteria; o__Burkholderiales; f__Comamonadaceae; g__Rhodoferax; s__	0.00313909	0.00571475	0.00321958	0.00217321	0.00136832	0.00128783	0.00144881	0.00128783	0.000925628	0.00185126	0.00277688	0.00205248	0.00857212	0.0106648	0.00358178	0.00068416	0.0011671	0.00124759	0.0122344	0.00841114	0.00499034	0.00583548	0.00555377	0.00446716	0.000321958	0.00205248	0.000764649	0.0041452	0.00764649	0.0041452	0.00410496	0.00519156	0.00281713	0.00362202	0.0011671	0.00273664	0.0018915	0.00197199	0.00764649	0.00664037	0.00450741	0.00768674	0.0015293	0.00060367	0.000321958	0.0122344	0.0179491	0.0127978
OTU_23	k__Bacteria; p__Actinobacteria; c__Acidimicrobiia; o__Acidimicrobiales; f__C111; g__; s__	0.00148905	0.00285737	0.00394398	0.00941726	0.0103026	0.00748551	0.00370251	0.00466838	0.00744527	0.000241468	0.000321958	0.000321958	0.003783	0.0121137	0.00716355	0.00619768	0.00619768	0.00422569	0.00197199	0.00366227	0.00112685	0.00120734	0.0015293	0.000563426	0.000925628	0.00108661	0.00060367	0.00446716	0.00941726	0.0126368	0.00643915	0.00410496	0.00672086	0.00704282	0.00374276	0.00990019	0.00277688	0.0022537	0.00229395	0.00193175	0.00128783	0.00209272	0.00330006	0.00543303	0.0022537	0.00124759	0.00523181	0.000965873
OTU_11991	k__Bacteria; p__Actinobacteria; c__Acidimicrobiia; o__Acidimicrobiales; f__C111; g__; s__	0.00563426	0.00965873	0.0130393	0.00539279	0.00507083	0.00853187	0.00490985	0.00631842	0.00869285	0.000201223	0.000120734	0.000160979	0.00297811	0.00539279	0.00394398	0.0056745	0.00285737	0.00209272	0.00112685	0.000523181	0.000482936	0.00293786	0.00265615	0.00193175	0.000241468	4.02447e-05	0.000160979	0.00402447	0.00237444	0.00466838	0.0026159	0.00354153	0.00281713	0.00358178	0.00277688	0.00619768	0.0060367	0.00499034	0.00422569	0.00394398	0.0026159	0.00539279	0.00660013	0.00539279	0.00668062	0.00140856	0.0108258	0.00193175
OTU_17859	k__Bacteria; p__Actinobacteria; c__Actinobacteria; o__Actinomycetales; f__ACK-M1; g__; s__	0.00241468	0.00321958	0.00309884	0.00382325	0.0026159	0.00313909	0.0041452	0.00515132	0.00289762	0.00748551	0.0106648	0.00829041	0.0034208	0.00148905	0.00241468	0.00470863	0.00325982	0.00293786	8.04894e-05	0.00068416	0.000402447	0.000281713	0.000201223	0.000241468	0.000523181	0.000321958	0.000241468	0.0026159	0.00177077	0.0018915	0.003783	0.00466838	0.00366227	0.00213297	0.00346104	0.00406471	0.00185126	0.0015293	0.00128783	0.00265615	0.00233419	0.00325982	0.00209272	0.00579524	0.00490985	0.00213297	0.00229395	0.00205248
OTU_18907	k__Bacteria; p__Verrucomicrobia; c__Opitutae; o__[Cerasicoccales]; f__[Cerasicoccaceae]; g__; s__	0.00148905	0.00108661	0.00108661	0.00583548	0.00470863	0.00869285	0.00905505	0.00760625	0.0113892	0.00108661	0.000845138	0.0011671	0.00764649	0.00132807	0.00700258	0.0119527	0.0150515	0.0143271	0.000160979	0.000643915	0.000241468	0.000482936	0.000120734	0.000201223	0.000160979	4.02447e-05	0	0.00825016	0.00503059	0.00313909	0.0105039	0.00929652	0.00635866	0.00523181	0.00382325	0.00338055	0.000965873	0.0011671	0.00148905	0.000402447	0.000482936	0.000120734	0.000482936	0.000482936	0.000643915	4.02447e-05	0.000160979	0.000120734
OTU_448	k__Bacteria; p__[Thermi]; c__Deinococci; o__Deinococcales; f__Deinococcaceae; g__Deinococcus; s__	0.000442692	0.000281713	0.000201223	0.000120734	0.000563426	0	8.04894e-05	0.000120734	0.000321958	0.000201223	0.000241468	0.000402447	0.000201223	0.00390373	0.000120734	8.04894e-05	0.000160979	0.00108661	0.00933677	0.00406471	0.00317933	0.000201223	0.000442692	0.000120734	0.00543303	0.083226	0.00229395	0.000482936	0.0053123	0.000885383	0.000160979	8.04894e-05	0.00732453	0.00265615	0.00370251	0.000643915	0.00257566	0.021209	0.00241468	0.00068416	0.00265615	0.000201223	0.00104636	0.000160979	0.000321958	0.000281713	0.00108661	0.00100612
OTU_14209	k__Bacteria; p__Chlorobi; c__OPB56; o__; f__; g__; s__	0.00289762	0.00281713	0.00358178	0.000925628	0.000885383	0.0011671	0.00144881	0.00209272	0.00144881	8.04894e-05	0.000201223	0.000362202	0.00120734	0.000804894	0.00100612	0.00165003	0.0018915	0.0018915	0.000241468	0.00293786	0.000482936	0.00136832	0.0015293	0.00169028	0	8.04894e-05	0	0.000764649	0.00068416	0.00104636	0.00128783	0.000965873	0.00060367	0.00511108	0.00309884	0.00639891	0.0129185	0.0103429	0.0112685	0.00631842	0.00462814	0.00591597	0.0154942	0.0102624	0.0156954	0.00374276	0.00285737	0.00313909
OTU_42	k__Bacteria; p__Actinobacteria; c__Actinobacteria; o__Actinomycetales; f__; g__; s__	0.00281713	0.00833065	0.00651964	0.00466838	0.00515132	0.00579524	0.00350129	0.00406471	0.00748551	0.000201223	0.000281713	0.000160979	0.00450741	0.00458789	0.00503059	0.00406471	0.00273664	0.00209272	0.00418545	0.00317933	0.0022537	0.000885383	0.0011671	0.00148905	0.000281713	8.04894e-05	0.000201223	0.00402447	0.00442692	0.00410496	0.00317933	0.00354153	0.00277688	0.00293786	0.00418545	0.00390373	0.00317933	0.00330006	0.00265615	0.00325982	0.00140856	0.00321958	0.00193175	0.00410496	0.00386349	0.00108661	0.00193175	0.00108661
OTU_20353	k__Bacteria; p__Bacteroidetes; c__Flavobacteriia; o__Flavobacteriales; f__Cryomorphaceae; g__Fluviicola; s__	0.00185126	0.00108661	0.00140856	0.00426594	0.00354153	0.0041452	0.00466838	0.00503059	0.00370251	0.000321958	0.000523181	0.000402447	0.00281713	0.00104636	0.00205248	0.00591597	0.00559401	0.00575499	0.000201223	0.000362202	0.000281713	0.00132807	0.000764649	0.0015293	0.000281713	0.000724404	0.000724404	0.00185126	0.00265615	0.00289762	0.00350129	0.00390373	0.00346104	0.00281713	0.00229395	0.00442692	0.00132807	0.00120734	0.00108661	0.00362202	0.00764649	0.0056745	0.0111478	0.00760625	0.0113892	0.00410496	0.00394398	0.00651964
OTU_20066	k__Bacteria; p__Bacteroidetes; c__Cytophagia; o__Cytophagales; f__Cytophagaceae; g__; s__	0.0018915	0.00136832	0.00185126	0.00160979	0.00128783	0.00136832	0.00241468	0.0022537	0.00181101	0.00402447	0.00462814	0.00466838	0.00205248	0.000442692	0.00209272	0.00169028	0.00185126	0.00160979	0.000201223	0.000321958	0.000402447	0.0083709	0.00869285	0.00784771	0.000442692	0.00156954	0.000643915	0.0015293	0.000482936	0.000845138	0.00249517	0.000804894	0.00120734	0.00181101	0.00112685	0.00301835	0.000281713	0.000120734	0.00060367	0.000523181	0.000643915	0.000321958	0.000241468	0.000201223	0.000241468	0.000724404	0.000402447	0.000281713
OTU_20149	k__Bacteria; p__[Thermi]; c__Deinococci; o__Deinococcales; f__Deinococcaceae; g__Deinococcus; s__	0.000804894	0.000643915	0.000281713	0.000120734	0.000321958	0.000201223	0.000120734	0.000160979	0.000160979	0.000402447	0.000281713	0.000482936	0.000442692	0.00579524	0.000241468	0.000160979	0.000160979	0.00237444	0.0174259	0.00712331	0.0053123	0.000321958	0.000362202	0.000241468	0.00676111	0.0168625	0.00281713	0.000885383	0.007566	0.00132807	0.000362202	0.000201223	0.0122344	0.00780747	0.0060367	0.000965873	0.0041452	0.0339263	0.00382325	0.000804894	0.00374276	0.000201223	0.00293786	0.000523181	0.000120734	0.00112685	0.00233419	0.00169028
OTU_14132	k__Bacteria; p__Proteobacteria; c__Betaproteobacteria; o__Burkholderiales; f__Comamonadaceae; g__Limnohabitans; s__	0.00165003	0.00402447	0.0018915	0.00201223	0.00257566	0.00229395	0.00148905	0.00104636	0.0015293	0.00490985	0.00631842	0.00547328	0.00269639	0.00728429	0.00346104	0.00120734	0.00112685	0.00120734	0.00921603	0.00744527	0.0158162	0.00124759	0.000965873	0.00160979	0.00140856	0.003783	0.000845138	0.00233419	0.00374276	0.00185126	0.00289762	0.00241468	0.00160979	0.00185126	0.00128783	0.00120734	0.0011671	0.00104636	0.00229395	0.00325982	0.00237444	0.00277688	0.000925628	0.000804894	0.000845138	0.00362202	0.00386349	0.00374276
OTU_20274	k__Bacteria; p__Bacteroidetes; c__[Saprospirae]; o__[Saprospirales]; f__Chitinophagaceae; g__Sediminibacterium; s__	0.0022537	0.0026159	0.00277688	0.00281713	0.00321958	0.00402447	0.00708307	0.00490985	0.00382325	0.00132807	0.00132807	0.00144881	0.00438667	0.00156954	0.00390373	0.00643915	0.00338055	0.00309884	0.000321958	0.00148905	0.00128783	0.000402447	0.000643915	0.000965873	0	0.000160979	0.000241468	0.00265615	0.00317933	0.00277688	0.00438667	0.00458789	0.00366227	0.00325982	0.00277688	0.00543303	0.00173052	0.0011671	0.00173052	0.00301835	0.00277688	0.00366227	0.00374276	0.00607695	0.00458789	0.00249517	0.00253542	0.00197199
OTU_17804	k__Bacteria; p__Cyanobacteria; c__Chloroplast; o__Cryptophyta; f__; g__; s__	0.00209272	0.00249517	0.00430618	0.00309884	0.00334031	0.00555377	0.00394398	0.0026159	0.00547328	0.000402447	8.04894e-05	0.000442692	0.00201223	0.000804894	0.00241468	0.0053123	0.00442692	0.00426594	0	0.000160979	0.000120734	0.00140856	0.00173052	0.00160979	4.02447e-05	0.000201223	0.000321958	0.00309884	0.00265615	0.00169028	0.00197199	0.00173052	0.000643915	0.00160979	0.000724404	0.00209272	0.00160979	0.00120734	0.00193175	0.00917579	0.0120332	0.0119527	0.0105039	0.00812943	0.0140052	0.00321958	0.00382325	0.00519156
OTU_20021	k__Bacteria; p__[Thermi]; c__Deinococci; o__Deinococcales; f__Deinococcaceae; g__Deinococcus; s__	0.000442692	0.000482936	0.000523181	0.000241468	0.000241468	8.04894e-05	8.04894e-05	4.02447e-05	0.000120734	0.000402447	0.000160979	0.000362202	0.000362202	0.00289762	0.000201223	0	0.000160979	0.00132807	0.0134015	0.00696233	0.00454765	0.000241468	0.000241468	0.000160979	0.00478912	0.051312	0.0018915	0.00104636	0.00595621	0.00144881	0.000201223	8.04894e-05	0.00808918	0.00458789	0.00579524	0.00100612	0.00245493	0.0274871	0.00273664	0.000804894	0.0026159	0.000563426	0.00221346	0.000442692	0.000160979	0.000643915	0.00140856	0.00104636
OTU_18256	k__Bacteria; p__Verrucomicrobia; c__Opitutae; o__[Cerasicoccales]; f__[Cerasicoccaceae]; g__; s__	0.00209272	0.00108661	0.00132807	0.000482936	0.000764649	0.000804894	0.00165003	0.0015293	0.00185126	0.0218126	0.016782	0.0239456	0.00177077	0.000201223	0.00136832	0.00165003	0.00156954	0.00185126	8.04894e-05	0.000442692	0.000201223	0.00193175	0.00197199	0.00273664	8.04894e-05	0.000160979	0.000201223	0.00120734	0.000724404	0.00068416	0.00169028	0.00213297	0.000563426	0.00112685	0.00124759	0.000925628	0.000764649	0.000804894	0.00136832	0.000643915	0.00209272	0.0011671	0.00132807	0.00132807	0.00165003	0.000281713	0.000482936	0.000482936
OTU_30	k__Bacteria; p__Firmicutes; c__Bacilli; o__Bacillales; f__[Exiguobacteraceae]; g__Exiguobacterium; s__	0.00060367	0.00173052	0.00446716	0.000764649	0.00213297	0.000402447	0.00165003	0.000321958	0.00233419	0.0022537	0.000362202	0.00068416	0.00249517	0.000804894	0.0011671	0.000362202	0.000925628	0.00249517	0.000764649	0.000764649	0.000563426	0.000845138	0.000925628	0.000845138	0.0087331	0.00229395	0.0310689	0.00744527	0.0135222	0.047207	0.000281713	0.000321958	0.000321958	0.000764649	0.000643915	0.00124759	0.0018915	0.00197199	0.000925628	0.000321958	0.00060367	0.000281713	0.00185126	0.000643915	0.000523181	0.00209272	0.00120734	0.000523181
OTU_46	k__Bacteria; p__Chloroflexi; c__SL56; o__; f__; g__; s__	0.00233419	0.00177077	0.00193175	0.00185126	0.00165003	0.00148905	0.00237444	0.00257566	0.00346104	8.04894e-05	0.000120734	4.02447e-05	0.00169028	0.00104636	0.00177077	0.00156954	0.00221346	0.00148905	0.000442692	0.000402447	0.000563426	0.000321958	0.000362202	0.000201223	0.000160979	0.000120734	0.000120734	0.00108661	0.00181101	0.00112685	0.00173052	0.00185126	0.00173052	0.00217321	0.00221346	0.00177077	0.0102222	0.00780747	0.00748551	0.00398422	0.00434643	0.00390373	0.0117112	0.0161784	0.0147698	0.0034208	0.00277688	0.00253542
OTU_44	k__Bacteria; p__Proteobacteria; c__Alphaproteobacteria; o__Rickettsiales; f__Pelagibacteraceae; g__; s__	0.00277688	0.00330006	0.00281713	0.00277688	0.00217321	0.00334031	0.0041452	0.00374276	0.00478912	8.04894e-05	4.02447e-05	8.04894e-05	0.00297811	0.00160979	0.00313909	0.00382325	0.00185126	0.00160979	0.000845138	0.00334031	0.00128783	0.00169028	0.00177077	0.00124759	4.02447e-05	0.000120734	8.04894e-05	0.00221346	0.00112685	0.00124759	0.00289762	0.00217321	0.00112685	0.00301835	0.00197199	0.00434643	0.00426594	0.00330006	0.00547328	0.0041452	0.00330006	0.00615744	0.00370251	0.0123149	0.00664037	0.00100612	0.0022537	0.00156954
OTU_38	k__Bacteria; p__Proteobacteria; c__Alphaproteobacteria; o__Rhodospirillales; f__Acetobacteraceae; g__; s__	0.00257566	0.00285737	0.00201223	0.00426594	0.00571475	0.00543303	0.0022537	0.00257566	0.00382325	0	4.02447e-05	8.04894e-05	0.00370251	0.00515132	0.00676111	0.0026159	0.00555377	0.00486961	0.000925628	0.00112685	0.000241468	0	8.04894e-05	8.04894e-05	0.000160979	0.000160979	0.000120734	0.00265615	0.0041452	0.00470863	0.00382325	0.00297811	0.00241468	0.00265615	0.00217321	0.00269639	0.00519156	0.00462814	0.00450741	0.0083709	0.00579524	0.00583548	0.00430618	0.00438667	0.00507083	0.00193175	0.00185126	0.00169028
OTU_1781	k__Bacteria; p__Proteobacteria; c__Alphaproteobacteria; o__Rhodobacterales; f__Rhodobacteraceae; g__Rhodobacter; s__	0.00217321	0.00301835	0.00253542	0.00112685	0.00197199	0.000965873	0.000402447	0.000724404	0.000563426	0.00313909	0.00136832	0.00289762	0.00185126	0.00237444	0.00144881	0.00068416	0.00112685	0.000845138	0.0145283	0.0056745	0.00788796	0.00185126	0.00249517	0.00156954	0.00941726	0.0094575	0.0103026	0.00140856	0.00446716	0.00257566	0.0011671	0.00112685	0.00169028	0.0018915	0.00438667	0.00100612	0.000845138	0.000845138	0.00144881	0.000482936	0.000563426	0.000563426	0.00185126	0.000321958	0.000402447	0.00124759	0.00120734	0.0249517
OTU_36	k__Bacteria; p__Actinobacteria; c__Actinobacteria; o__Actinomycetales; f__Microbacteriaceae; g__Candidatus Rhodoluna; s__	0.000523181	0.000764649	0.000523181	0.000643915	0.000925628	0.000643915	0.000201223	0.000362202	0.000764649	0.0140052	0.0140454	0.013321	0.000925628	0.000523181	0.000643915	0.000563426	0.000724404	0.000402447	0.000442692	0.000925628	0.000845138	0.011671	0.0126771	0.0108661	0.0124759	0.00309884	0.00599646	0.000362202	0.000804894	0.00160979	0.00201223	0.00136832	0.00100612	0.000724404	0.000442692	0.000643915	0.000201223	0.000402447	0.00060367	0.000281713	0.000321958	0.000402447	0.000201223	0.000362202	0.000362202	0.000643915	0.000724404	0.000724404
OTU_1843	k__Bacteria; p__Proteobacteria; c__Betaproteobacteria; o__Burkholderiales; f__Comamonadaceae; g__Hydrogenophaga; s__	0.00112685	0.00330006	0.00181101	0.00108661	0.00156954	0.00068416	0.000482936	0.000321958	0.00060367	0.00257566	0.00325982	0.00229395	0.00173052	0.00201223	0.00293786	0.000563426	0.000321958	0.000724404	0.00406471	0.00515132	0.00470863	0.00181101	0.00193175	0.00229395	0.0011671	0.00181101	0.00124759	0.00181101	0.00293786	0.00233419	0.0026159	0.00265615	0.0339665	0.00338055	0.00507083	0.00213297	0.00169028	0.00527205	0.00579524	0.000643915	0.00173052	0.00120734	0.00209272	0.000362202	0.000160979	0.0079282	0.00382325	0.00559401
OTU_20643	k__Bacteria; p__Proteobacteria; c__Betaproteobacteria; o__Burkholderiales; f__Oxalobacteraceae; g__Polynucleobacter; s__	0.000523181	0.00124759	0.000764649	0.000563426	0.000482936	0.000724404	0.000482936	0.000241468	0.000442692	0.0118722	0.0127576	0.0107453	0.00060367	0.000925628	0.00060367	0.000241468	0.000523181	0.000281713	0.000402447	0.000241468	0.000241468	0.0100612	0.0102222	0.0122746	0.00160979	0.00253542	0.00156954	0.000241468	0.000563426	0.000563426	0.000724404	0.000804894	0.00108661	0.000523181	0.00068416	0.000764649	0.000201223	4.02447e-05	8.04894e-05	0.000160979	0.000201223	8.04894e-05	8.04894e-05	8.04894e-05	8.04894e-05	0.00120734	0.00128783	0.00104636
OTU_14348	k__Bacteria; p__Proteobacteria; c__Betaproteobacteria; o__Burkholderiales; f__Comamonadaceae; g__Hydrogenophaga; s__	0.00201223	0.00382325	0.00205248	0.000965873	0.00120734	0.000442692	0.000402447	0.000563426	0.000362202	0.00358178	0.00366227	0.00338055	0.00221346	0.00205248	0.00241468	0.000523181	0.000402447	0.00060367	0.00527205	0.00446716	0.00466838	0.00197199	0.00165003	0.00177077	0.00108661	0.00241468	0.00068416	0.00233419	0.0034208	0.00281713	0.00265615	0.00289762	0.0199614	0.0034208	0.00631842	0.00185126	0.0022537	0.00426594	0.00631842	0.000643915	0.00205248	0.0011671	0.00253542	0.000523181	0.000362202	0.00728429	0.00446716	0.00664037
OTU_48	k__Bacteria; p__Cyanobacteria; c__Chloroplast; o__Cryptophyta; f__; g__; s__	0.00728429	0.00571475	0.00941726	0.00587572	0.00482936	0.0090953	0.00325982	0.00330006	0.0060367	0.00068416	0.000402447	0.00104636	0.00213297	0.00124759	0.00273664	0.00330006	0.00434643	0.00317933	0.000402447	0.000643915	0.000241468	0.0135625	0.0125161	0.0153332	0.000362202	0.000724404	0.000885383	0.00334031	0.00249517	0.00273664	0.00209272	0.0015293	0.000643915	0.00213297	0.000764649	0.00281713	4.02447e-05	0.000160979	0.000120734	0.000201223	0.000160979	0.000120734	0.000241468	4.02447e-05	0.000281713	0.000120734	8.04894e-05	4.02447e-05
OTU_13121	k__Bacteria; p__Actinobacteria; c__Acidimicrobiia; o__Acidimicrobiales; f__C111; g__; s__	0.000885383	0.00169028	0.00253542	0.00575499	0.00768674	0.00559401	0.00241468	0.00257566	0.00370251	0.000120734	0.000321958	0.000281713	0.00289762	0.0072038	0.0041452	0.00458789	0.00346104	0.00301835	0.00144881	0.00257566	0.00060367	0.00060367	0.00165003	0.000442692	0.000442692	0.000402447	0.000241468	0.00330006	0.00704282	0.00861236	0.00499034	0.00285737	0.00470863	0.0049501	0.00277688	0.00595621	0.0018915	0.00120734	0.00132807	0.000804894	0.000925628	0.00185126	0.0026159	0.00350129	0.00173052	0.00144881	0.00321958	0.000523181
OTU_17603	k__Bacteria; p__Cyanobacteria; c__Synechococcophycideae; o__Synechococcales; f__Synechococcaceae; g__Synechococcus; s__	0.00499034	0.00825016	0.00829041	0.00132807	0.00221346	0.00229395	0.0011671	0.00193175	0.00374276	0.00100612	0.000523181	0.00136832	0.00128783	0.00177077	0.00144881	0.0018915	0.00317933	0.00309884	0.000160979	0.000321958	8.04894e-05	0.000482936	0.000241468	4.02447e-05	0.000241468	4.02447e-05	4.02447e-05	0.0011671	0.00185126	0.00128783	0.00108661	0.00068416	0.00136832	0.00185126	0.000402447	0.00193175	0.00917579	0.00804894	0.011349	0.007566	0.00664037	0.00547328	0.0103429	0.00499034	0.00897457	0.00181101	0.00124759	0.00120734
OTU_26	k__Bacteria; p__Bacteroidetes; c__Sphingobacteriia; o__Sphingobacteriales; f__; g__; s__	0.00277688	0.000563426	0.00136832	0.00269639	0.00181101	0.00209272	0.0030586	0.00309884	0.00354153	0.0053123	0.00454765	0.00394398	0.00185126	0.00104636	0.00237444	0.00418545	0.00346104	0.00350129	0.000402447	0.00297811	0.00108661	0.00277688	0.00297811	0.00277688	0.000120734	0.000362202	0.000362202	0.00136832	0.00108661	0.00112685	0.00362202	0.00237444	0.00205248	0.00253542	0.00177077	0.00257566	0.00124759	0.000925628	0.00120734	0.0022537	0.00253542	0.00233419	0.00490985	0.00418545	0.00543303	0.00213297	0.00165003	0.00169028
OTU_35	k__Bacteria; p__Bacteroidetes; c__Flavobacteriia; o__Flavobacteriales; f__Flavobacteriaceae; g__Flavobacterium; s__	0.000241468	0.000120734	0.000241468	0.00462814	0.00297811	0.00382325	0.00623793	0.00571475	0.00486961	0	0	0.000201223	0.00241468	0.00136832	0.00346104	0.00925628	0.00889408	0.00804894	0.000925628	0.00358178	0.00313909	0.00132807	0.0018915	0.00173052	0.000321958	0.000160979	0.000120734	0.00374276	0.00313909	0.00241468	0.00615744	0.00748551	0.00563426	0.00575499	0.00426594	0.00555377	0.000563426	0.000321958	0.000402447	0.00100612	0.00104636	0.000482936	0.00100612	0.000724404	0.000965873	0.000885383	0.000442692	0.000523181
OTU_45	k__Bacteria; p__Proteobacteria; c__Gammaproteobacteria; o__Xanthomonadales; f__Xanthomonadaceae; g__Thermomonas; s__	0.000643915	0.00136832	0.000643915	0.00132807	0.00181101	0.000724404	0.000402447	0.000362202	0.00068416	0.000362202	0.000362202	0.000241468	0.000321958	0.00221346	0.000362202	0.000402447	0.000845138	0.00120734	0.00173052	0.00140856	0.00181101	0.00060367	0.000643915	0.00068416	0.0144881	0.041774	0.0105039	0.00140856	0.00269639	0.00309884	0.000482936	0.000764649	0.00104636	0.00229395	0.0112685	0.00201223	0.000724404	0.00245493	0.00100612	0.000482936	0.000965873	0.000362202	0.00398422	0.00140856	0.000160979	0.0018915	0.000402447	0.00156954
OTU_20359	k__Bacteria; p__Bacteroidetes; c__Sphingobacteriia; o__Sphingobacteriales; f__; g__; s__	0.00221346	0.000764649	0.00205248	0.00205248	0.00136832	0.00277688	0.00249517	0.00277688	0.0041452	0.00394398	0.00434643	0.00386349	0.00217321	0.00108661	0.00205248	0.00370251	0.00410496	0.00539279	0.000482936	0.00269639	0.00104636	0.0022537	0.00257566	0.00269639	8.04894e-05	0.000201223	0.000241468	0.00128783	0.00144881	0.00060367	0.00338055	0.00213297	0.0022537	0.00245493	0.00173052	0.00277688	0.000804894	0.000442692	0.00108661	0.00241468	0.00209272	0.0022537	0.00470863	0.0041452	0.0056745	0.00229395	0.00148905	0.00237444
OTU_41	k__Bacteria; p__Bacteroidetes; c__Flavobacteriia; o__Flavobacteriales; f__Flavobacteriaceae; g__Flavobacterium; s__	0.00273664	0.00148905	0.00136832	0.00394398	0.00289762	0.00382325	0.00426594	0.00515132	0.00374276	8.04894e-05	0.000160979	0	0.00253542	0.00160979	0.00285737	0.00543303	0.00688184	0.00696233	0.000523181	0.0015293	0.00136832	0.00382325	0.00358178	0.00249517	0.00144881	0.00173052	0.00108661	0.00277688	0.00233419	0.00177077	0.00346104	0.00438667	0.00325982	0.00321958	0.00177077	0.00362202	0.000402447	0.000201223	0.000321958	0.00201223	0.00213297	0.00201223	0.00358178	0.00325982	0.003783	0.00285737	0.00245493	0.00346104
OTU_50	k__Bacteria; p__Actinobacteria; c__Actinobacteria; o__Actinomycetales; f__ACK-M1; g__; s__	0.00346104	0.00547328	0.003783	0.00486961	0.00370251	0.00426594	0.00708307	0.00627817	0.00434643	0.000201223	0.000241468	8.04894e-05	0.00535254	0.00221346	0.00193175	0.00583548	0.00442692	0.00426594	0.000442692	0.000482936	0.000321958	0.000482936	0.00068416	0.00068416	0.000120734	4.02447e-05	0.000160979	0.00426594	0.00229395	0.00430618	0.00474887	0.00507083	0.00350129	0.00354153	0.00559401	0.00595621	0.00144881	0.000643915	0.000724404	0.000442692	0.000764649	0.000845138	0.000482936	0.000845138	0.000804894	0.000362202	0.000362202	0.000402447
OTU_14371	k__Bacteria; p__Proteobacteria; c__Betaproteobacteria; o__Neisseriales; f__Neisseriaceae; g__Vogesella; s__	0.00060367	0.000764649	0.000321958	4.02447e-05	4.02447e-05	0	0	0.000160979	4.02447e-05	0.000120734	0.000241468	8.04894e-05	0.00354153	0.00454765	0.000241468	8.04894e-05	8.04894e-05	8.04894e-05	0.0155344	0.0177479	0.0453558	0.000201223	0.000201223	0.000120734	0.000120734	0.000563426	8.04894e-05	0.00478912	0.000764649	0.000281713	0.000120734	0.000160979	0.000120734	0.000201223	4.02447e-05	0.000160979	0.000804894	0.000442692	0.000482936	0	0.000321958	0.000120734	0.000281713	0.000120734	8.04894e-05	0.00482936	0.0022537	0.0162991
OTU_40	k__Bacteria; p__Proteobacteria; c__Betaproteobacteria; o__Burkholderiales; f__Comamonadaceae; g__Polaromonas; s__	0.00165003	0.0015293	0.00177077	0.00442692	0.00354153	0.003783	0.00474887	0.00507083	0.00382325	0.000321958	0.000160979	8.04894e-05	0.00370251	0.00132807	0.00402447	0.00486961	0.00418545	0.00257566	0.000523181	0.000925628	0.00068416	0.000845138	0.00100612	0.00108661	0.000241468	0.000201223	0.000160979	0.00269639	0.00217321	0.00156954	0.00410496	0.00462814	0.00346104	0.00325982	0.00334031	0.00301835	0.00185126	0.00148905	0.00173052	0.00430618	0.00434643	0.00458789	0.00209272	0.00313909	0.0026159	0.00241468	0.00197199	0.00209272
OTU_37	k__Bacteria; p__Bacteroidetes; c__[Saprospirae]; o__[Saprospirales]; f__Chitinophagaceae; g__; s__	0.00362202	0.00277688	0.00233419	0.000885383	0.00120734	0.00144881	0.00193175	0.00128783	0.00181101	4.02447e-05	0.000160979	4.02447e-05	0.00181101	0.00124759	0.00265615	0.00229395	0.00289762	0.00237444	0.000120734	0.000643915	0.000201223	0.000321958	0.000281713	0.000321958	0.000120734	0	8.04894e-05	0.00108661	0.00124759	0.000885383	0.00124759	0.00132807	0.00120734	0.00350129	0.00257566	0.0022537	0.00418545	0.00265615	0.00366227	0.00820992	0.00740502	0.00619768	0.00752576	0.00712331	0.00865261	0.00313909	0.00338055	0.00281713
OTU_9314	k__Bacteria; p__Proteobacteria; c__Betaproteobacteria; o__Neisseriales; f__Neisseriaceae; g__Vogesella; s__	0.00173052	0.000845138	0.00120734	0.000402447	8.04894e-05	0.000160979	0.000201223	0.000120734	8.04894e-05	0.00136832	0.000804894	0.000885383	0.00583548	0.00334031	0.000643915	4.02447e-05	0.000120734	0.000120734	0.0458387	0.0109868	0.0143271	0.000241468	0.000402447	8.04894e-05	0.000120734	0.000160979	0.000321958	0.00100612	0.000925628	0.000362202	0.000281713	0.0011671	0.000160979	0.000563426	0.00197199	0.000241468	0.000160979	0.000281713	0.00136832	0.000241468	8.04894e-05	0.000120734	0.00104636	4.02447e-05	0.000120734	0.00973921	0.00551352	0.00651964
OTU_33	k__Bacteria; p__Proteobacteria; c__Betaproteobacteria; o__Burkholderiales; f__Comamonadaceae; g__Methylibium; s__petroleiphilum	0.00148905	0.00128783	0.00120734	0.00124759	0.00100612	0.0011671	0.000764649	0.00108661	0.000965873	0.000241468	0.000804894	0.000643915	0.00068416	0.00346104	0.00334031	0.000523181	0.00108661	0.00124759	0.00060367	0.000402447	0.0011671	0.00104636	0.00060367	0.00128783	0.000845138	0.000563426	0.000724404	0.00543303	0.00108661	0.00104636	0.00112685	0.000764649	0.00140856	0.0011671	0.00973921	0.00249517	0.011188	0.00716355	0.000885383	0.00462814	0.000965873	0.00209272	0.00249517	0.00724404	0.000241468	0.013482	0.000925628	0.00181101
OTU_11217	k__Bacteria; p__Actinobacteria; c__Acidimicrobiia; o__Acidimicrobiales; f__C111; g__; s__	0.00197199	0.00623793	0.00712331	0.00338055	0.00249517	0.00599646	0.00293786	0.00402447	0.00442692	8.04894e-05	8.04894e-05	0.000321958	0.00181101	0.00245493	0.00221346	0.00281713	0.00124759	0.00165003	0.000764649	0.000402447	0.000201223	0.00140856	0.00136832	0.00160979	0.000120734	4.02447e-05	8.04894e-05	0.00249517	0.00120734	0.00229395	0.00185126	0.00221346	0.0015293	0.00221346	0.00185126	0.00354153	0.00301835	0.00237444	0.0030586	0.0018915	0.00173052	0.00430618	0.00362202	0.00301835	0.00515132	0.000885383	0.00499034	0.0015293
OTU_10577	k__Bacteria; p__Actinobacteria; c__Acidimicrobiia; o__Acidimicrobiales; f__C111; g__; s__	0.00068416	0.00144881	0.0018915	0.00736478	0.00885383	0.00760625	0.00213297	0.0030586	0.00466838	8.04894e-05	4.02447e-05	8.04894e-05	0.00249517	0.00857212	0.00535254	0.00338055	0.00334031	0.00350129	0.000643915	0.0011671	0.000241468	0.000402447	0.00104636	0.000804894	0.000241468	0.000362202	0.000241468	0.00338055	0.00744527	0.0105844	0.00426594	0.00370251	0.00434643	0.0034208	0.00213297	0.00454765	0.000764649	0.000402447	0.000442692	0.000241468	0.000241468	0.000321958	0.000321958	0.000201223	0.000201223	0.000120734	0.000523181	0
OTU_13405	k__Bacteria; p__Actinobacteria; c__Actinobacteria; o__Actinomycetales; f__ACK-M1; g__; s__	0.00112685	0.00197199	0.00169028	0.0026159	0.0015293	0.00165003	0.00354153	0.00350129	0.00201223	0.00430618	0.00660013	0.00402447	0.00297811	0.00060367	0.00181101	0.00285737	0.00193175	0.00177077	0.000241468	0.000321958	0.000281713	0.000362202	0.000201223	0.000160979	0.000281713	0.000120734	0.000201223	0.00165003	0.00124759	0.00120734	0.00293786	0.00265615	0.00201223	0.00185126	0.00233419	0.00197199	0.00169028	0.00108661	0.00108661	0.00181101	0.00185126	0.00338055	0.00132807	0.00354153	0.00281713	0.00100612	0.00132807	0.00124759
OTU_49	k__Bacteria; p__Bacteroidetes; c__Flavobacteriia; o__Flavobacteriales; f__Cryomorphaceae; g__; s__	0.00462814	0.00165003	0.00253542	0.00124759	0.00068416	0.00156954	0.00229395	0.00237444	0.00245493	0.00499034	0.00350129	0.00591597	0.00209272	0.00120734	0.00269639	0.00249517	0.00281713	0.00334031	0	0.000563426	0.000321958	0.00128783	0.000643915	0.000523181	0.000160979	0	0	0.0011671	0.00120734	0.00100612	0.00209272	0.00120734	0.00160979	0.00253542	0.00128783	0.00213297	0.00185126	0.00140856	0.00124759	0.00346104	0.0056745	0.00430618	0.00249517	0.00181101	0.0026159	0.00193175	0.00181101	0.00132807
OTU_14943	k__Bacteria; p__Proteobacteria; c__Betaproteobacteria; o__Burkholderiales; f__Comamonadaceae; g__Rhodoferax; s__	0.00241468	0.00297811	0.00313909	0.00269639	0.00281713	0.00301835	0.00321958	0.00382325	0.00265615	0.00060367	0.00128783	0.000925628	0.00354153	0.00136832	0.00293786	0.00209272	0.00265615	0.00289762	0.00100612	0.00173052	0.000885383	0.00237444	0.00289762	0.00382325	0.00068416	0.000482936	0.000925628	0.00257566	0.00362202	0.00185126	0.003783	0.00317933	0.00346104	0.00317933	0.00245493	0.00245493	0.00160979	0.00237444	0.00269639	0.00140856	0.00124759	0.00136832	0.00128783	0.00144881	0.00165003	0.0026159	0.00221346	0.0022537
OTU_58	k__Bacteria; p__Planctomycetes; c__OM190; o__CL500-15; f__; g__; s__	0.00108661	0.000804894	0.00100612	0.000160979	0.000160979	0.000402447	0.000442692	0.000965873	0.0011671	4.02447e-05	4.02447e-05	0	0.000523181	0.000241468	0.000402447	0.000241468	0.000402447	0.000724404	0	4.02447e-05	0	8.04894e-05	0.000120734	0.000120734	4.02447e-05	0.000120734	0	0.000281713	0.000321958	0.000321958	0.000523181	0.000120734	0.000201223	0.000643915	0.000402447	0.000362202	0.0290164	0.0264005	0.0232614	0.00201223	0.00217321	0.000724404	0.00499034	0.00249517	0.00462814	0.000523181	0.000804894	0.000442692
OTU_17936	k__Bacteria; p__Cyanobacteria; c__Chloroplast; o__Stramenopiles; f__; g__; s__	0.00173052	0.000885383	0.00144881	0.00301835	0.003783	0.00438667	0.003783	0.0022537	0.00233419	4.02447e-05	0.000201223	0.000281713	0.00136832	0.000563426	0.00213297	0.00277688	0.00297811	0.00241468	0.000160979	0.000160979	0	0.00273664	0.00398422	0.00334031	0.000201223	0.000120734	0.000321958	0.00169028	0.000804894	0.000764649	0.0015293	0.0026159	0.00169028	0.00281713	0.00100612	0.00265615	0.00462814	0.00293786	0.00503059	0.0098197	0.00708307	0.00820992	0.00470863	0.000845138	0.00160979	0.000201223	0.000362202	0.000321958
OTU_13970	k__Bacteria; p__Proteobacteria; c__Betaproteobacteria; o__Burkholderiales; f__Oxalobacteraceae; g__Polynucleobacter; s__	0.00165003	0.00245493	0.00201223	0.00201223	0.00221346	0.00350129	0.00382325	0.00321958	0.00386349	0.00140856	0.00120734	0.00148905	0.00285737	0.00209272	0.00301835	0.0026159	0.0018915	0.00181101	0.000442692	0.000845138	0.000563426	0.0011671	0.00148905	0.00132807	0.000241468	0.000643915	0.000321958	0.00185126	0.00245493	0.00124759	0.00229395	0.00253542	0.00144881	0.00229395	0.00229395	0.00249517	0.000885383	0.00100612	0.00124759	0.00338055	0.00221346	0.00237444	0.00165003	0.00265615	0.00317933	0.00165003	0.00148905	0.0011671
OTU_6155	k__Bacteria; p__Firmicutes; c__Bacilli; o__Bacillales; f__[Exiguobacteraceae]; g__; s__	0.000764649	0.00104636	0.000965873	0.00136832	0.00229395	0.000845138	0.00104636	0.000563426	0.000845138	0.00853187	0.00108661	0.00406471	0.0114295	0.00132807	0.00144881	0.000965873	0.000965873	0.00104636	0.000523181	0.000965873	0.00104636	0.0015293	0.00245493	0.00108661	0.00547328	0.00160979	0.0144076	0.00350129	0.00454765	0.0107051	0.000523181	0.000442692	0.000442692	0.000965873	0.00100612	0.000724404	0.000563426	0.000362202	0.000845138	0.00060367	0.000402447	0.00060367	0.00128783	0.000643915	0.000482936	0.00124759	0.000965873	0.000845138
OTU_13666	k__Bacteria; p__Cyanobacteria; c__Synechococcophycideae; o__Synechococcales; f__Synechococcaceae; g__Synechococcus; s__	0.000885383	0.00132807	0.00060367	0.000120734	0.000281713	0.000241468	0.000120734	0.000241468	0.000321958	0	4.02447e-05	0	0.000160979	0.000241468	4.02447e-05	0.000201223	0.000281713	0.000241468	0	8.04894e-05	0	4.02447e-05	4.02447e-05	4.02447e-05	0	4.02447e-05	4.02447e-05	8.04894e-05	0.000120734	0.000281713	0	4.02447e-05	4.02447e-05	0.000321958	4.02447e-05	0.000643915	0.0206858	0.0173052	0.0158967	0.0126771	0.00857212	0.00913554	0.00338055	0.00346104	0.00301835	0.000885383	0.000643915	0.000402447
OTU_34	k__Bacteria; p__Proteobacteria; c__Alphaproteobacteria; o__Sphingomonadales; f__Sphingomonadaceae; g__Novosphingobium; s__	0.000563426	0.000523181	0.000442692	0.000402447	0.000724404	0.000241468	8.04894e-05	0.000160979	0.000362202	0.000241468	0.000160979	8.04894e-05	0.000362202	0.000523181	0.000321958	0.000281713	0.000442692	0.000482936	0.00402447	0.00434643	0.00132807	0.0030586	0.00217321	0.00181101	0.0315921	0.0125563	0.0193577	0.00068416	0.00338055	0.0022537	0.000281713	0.000523181	0.000362202	0.00136832	0.00128783	0.000965873	0.000160979	0.000241468	0.000724404	0.000201223	0.000120734	0.000241468	0.00060367	8.04894e-05	8.04894e-05	0.000160979	0	0.000160979
OTU_61	k__Bacteria; p__Cyanobacteria; c__Chloroplast; o__Haptophyceae; f__; g__; s__	0.000241468	0.000281713	0.000201223	0.00112685	0.00068416	0.00173052	0.000965873	0.000885383	0.0015293	8.04894e-05	0	4.02447e-05	0.000482936	0.000201223	0.000362202	0.00136832	0.00173052	0.00104636	0	0	0	0.000643915	0.00108661	0.000402447	0	4.02447e-05	0	0.000845138	0.00128783	0.000764649	0.0011671	0.000362202	0.000281713	0.000442692	8.04894e-05	0.00060367	0.00165003	0.00120734	0.00140856	0.0120734	0.0188345	0.0131198	0.0101819	0.00941726	0.00788796	0.00100612	0.00144881	0.000925628
OTU_76	k__Bacteria; p__Nitrospirae; c__Nitrospira; o__Nitrospirales; f__Nitrospiraceae; g__Nitrospira; s__	0.000402447	0.000321958	0.000160979	0.000241468	0.000241468	0.000321958	0.00060367	0.000845138	0.00108661	8.04894e-05	0	0.000160979	0.000281713	0.000160979	0.000362202	0.000321958	0.000362202	0.000885383	8.04894e-05	0.000160979	0.000120734	0.000523181	0.000362202	0.00068416	0.000120734	0.000241468	0.000321958	0.000523181	0.000482936	0.000965873	0.000885383	0.000120734	0.000241468	0.000321958	0.000362202	0.000281713	0.0128783	0.0117112	0.0133612	0.00136832	0.000643915	0.00124759	0.00820992	0.0119527	0.0107051	0.00233419	0.00185126	0.00181101
OTU_19687	k__Bacteria; p__Bacteroidetes; c__[Saprospirae]; o__[Saprospirales]; f__Chitinophagaceae; g__Sediminibacterium; s__	0.0018915	0.00173052	0.0015293	0.00148905	0.00128783	0.00148905	0.00144881	0.0015293	0.00185126	0.00599646	0.00595621	0.00680135	0.00108661	0.000724404	0.00173052	0.00221346	0.00245493	0.00281713	8.04894e-05	0.000321958	0.000362202	0.00265615	0.00253542	0.00253542	0.00060367	0.000724404	0.000402447	0.00140856	0.000965873	0.00136832	0.00173052	0.00177077	0.00181101	0.00181101	0.00148905	0.00160979	0.000442692	0.000362202	0.000362202	0.00112685	0.0011671	0.00068416	0.00124759	0.00120734	0.00124759	0.000442692	0.00104636	0.000523181
OTU_17989	k__Bacteria; p__Firmicutes; c__Bacilli; o__Bacillales; f__[Exiguobacteraceae]; g__Exiguobacterium; s__	0.000281713	0.0018915	0.00277688	0.000764649	0.00156954	0.000281713	0.00120734	0.000160979	0.00120734	0.00148905	0.000241468	0.00060367	0.00160979	0.000724404	0.000724404	0.000563426	0.000563426	0.00177077	0.00068416	0.000321958	0.000724404	0.000845138	0.000241468	0.000804894	0.00406471	0.00148905	0.0183918	0.00519156	0.00897457	0.0257968	0.000120734	0.000120734	0.000160979	0.00060367	0.000563426	0.000482936	0.00108661	0.000845138	0.000764649	0.000402447	8.04894e-05	0.000281713	0.00120734	0.000201223	0.000241468	0.000724404	0.000965873	0.000281713
OTU_47	k__Bacteria; p__Verrucomicrobia; c__Opitutae; o__[Cerasicoccales]; f__[Cerasicoccaceae]; g__; s__	0.00177077	0.00068416	0.00160979	0.0022537	0.00124759	0.00273664	0.00313909	0.00313909	0.00434643	0.00120734	0.000764649	0.0015293	0.00325982	0.00060367	0.00277688	0.00362202	0.00406471	0.00410496	0.000120734	0.000402447	0.000241468	0.00173052	0.00156954	0.000845138	0	0	0	0.00354153	0.00201223	0.00144881	0.00398422	0.00317933	0.00233419	0.00209272	0.00140856	0.00144881	0.000160979	0.000120734	0.000402447	0.000160979	8.04894e-05	0.000241468	0.00100612	0.000402447	0.00108661	0.000241468	0.000160979	0.000160979
OTU_19510	k__Bacteria; p__Bacteroidetes; c__Flavobacteriia; o__Flavobacteriales; f__Flavobacteriaceae; g__Flavobacterium; s__	4.02447e-05	0.000120734	0	0.00430618	0.0026159	0.00571475	0.00257566	0.00273664	0.00217321	0.00148905	0.00132807	0.00169028	0.00350129	0.00177077	0.00370251	0.00350129	0.00317933	0.00313909	0.000321958	0.000563426	0.000764649	0.00374276	0.00422569	0.00390373	0.000523181	0.000845138	0.000523181	0.00185126	0.00136832	0.00144881	0.00269639	0.00289762	0.00197199	0.00173052	0.00140856	0.00241468	0.00060367	0.000523181	0.000724404	0.00132807	0.00245493	0.00148905	0.00140856	0.00156954	0.00120734	0.000965873	0.000724404	0.00124759
OTU_70	k__Bacteria; p__Acidobacteria; c__Acidobacteria-6; o__iii1-15; f__mb2424; g__; s__	0.00249517	0.00490985	0.00297811	0.000804894	0.000965873	0.0015293	0.0015293	0.00148905	0.00257566	0	0.000120734	4.02447e-05	0.00165003	0.00128783	0.00140856	0.00177077	0.00177077	0.00213297	0.000160979	0.000160979	8.04894e-05	0.000201223	0.000482936	0.000201223	4.02447e-05	0.000120734	0.000281713	0.0022537	0.00144881	0.00181101	0.00245493	0.0011671	0.00124759	0.0011671	0.00156954	0.00160979	0.00784771	0.00784771	0.00539279	0.00185126	0.00108661	0.00108661	0.00434643	0.00394398	0.00499034	0.000965873	0.00156954	0.00112685
OTU_612	k__Bacteria; p__Proteobacteria; c__Alphaproteobacteria; o__Sphingomonadales; f__; g__; s__	0.00197199	0.00221346	0.0022537	0.00104636	0.00177077	0.00160979	0.00132807	0.00060367	0.00205248	0.000563426	0.000362202	0.000724404	0.00120734	0.00144881	0.00112685	0.00100612	0.00136832	0.00112685	0.00060367	0.000523181	0.000321958	0.0111478	0.0100209	0.00825016	0.00688184	0.00672086	0.00885383	0.00108661	0.00108661	0.0015293	0.0015293	0.00197199	0.00197199	0.000885383	0.000563426	0.00068416	0.000160979	0.000402447	0.000402447	0.000120734	8.04894e-05	0.000201223	0.000120734	4.02447e-05	0.000120734	0.000241468	0.000281713	0.000120734
OTU_68	k__Bacteria; p__Proteobacteria; c__Alphaproteobacteria; o__Sphingomonadales; f__Sphingomonadaceae; g__; s__	0.000160979	0.000362202	0.000402447	0.0030586	0.00285737	0.00273664	0.00209272	0.00297811	0.0026159	4.02447e-05	8.04894e-05	4.02447e-05	0.00201223	0.00205248	0.0022537	0.00313909	0.0053123	0.00499034	0.000442692	0.00068416	0.000241468	0.000241468	0.000241468	0.000321958	0.000321958	8.04894e-05	0.000201223	0.0030586	0.00325982	0.00490985	0.00680135	0.00511108	0.0060367	0.00281713	0.00217321	0.0030586	0.00156954	0.00128783	0.00132807	0.00201223	0.00132807	0.00124759	0.0011671	0.00108661	0.00144881	0.00100612	0.000643915	0.000523181
OTU_15046	k__Bacteria; p__Proteobacteria; c__Betaproteobacteria; o__Burkholderiales; f__Comamonadaceae; g__Hydrogenophaga; s__	0.000724404	0.00112685	0.000523181	0.000885383	0.000643915	0.00068416	0.000321958	0.000362202	0.000482936	0.00285737	0.00398422	0.0030586	0.00108661	0.00104636	0.00104636	0.000442692	0.000362202	0.000482936	0.00209272	0.00293786	0.00229395	0.00136832	0.00169028	0.00136832	0.000523181	0.000442692	0.000563426	0.000482936	0.00104636	0.00140856	0.00108661	0.0018915	0.0327189	0.00128783	0.00128783	0.000804894	0.00120734	0.00358178	0.00173052	0.000442692	0.00124759	0.000281713	0.00068416	0.000241468	8.04894e-05	0.00217321	0.00217321	0.00140856
OTU_73	k__Bacteria; p__Bacteroidetes; c__Sphingobacteriia; o__Sphingobacteriales; f__Sphingobacteriaceae; g__Pedobacter; s__saltans	0.00148905	0.00132807	0.00132807	0.00185126	0.00197199	0.00140856	0.00177077	0.00181101	0.0018915	0.00173052	0.00160979	0.00177077	0.00156954	0.00185126	0.00205248	0.00313909	0.00249517	0.00205248	0.000925628	0.00124759	0.000885383	0.0026159	0.00245493	0.00197199	0.00124759	0.00100612	0.00140856	0.00185126	0.00140856	0.00160979	0.00221346	0.00181101	0.00181101	0.00185126	0.00136832	0.00156954	0.00128783	0.00112685	0.00140856	0.00128783	0.00277688	0.00148905	0.00177077	0.00205248	0.00221346	0.00120734	0.00136832	0.00128783
OTU_74	k__Bacteria; p__Proteobacteria; c__Gammaproteobacteria; o__Pseudomonadales; f__Moraxellaceae; g__Acinetobacter; s__rhizosphaerae	0.000201223	0.000281713	0.000120734	8.04894e-05	0.000241468	0.000201223	0.000523181	8.04894e-05	0.000160979	0.000160979	8.04894e-05	0.000160979	0.000120734	0.00173052	0.00289762	0.000281713	0.000120734	0.000201223	0.00144881	0.000442692	0.0018915	0.000201223	0.000120734	0.000160979	0.0034208	0.000321958	0.00374276	0.00382325	0.000402447	0.00965873	0.000201223	0.000281713	0.00068416	0.00579524	0.00229395	0.0159369	0.00325982	0.00269639	0.00148905	4.02447e-05	0.000845138	8.04894e-05	0.000845138	0.000523181	0.000120734	0.00136832	0.0015293	0.000724404
OTU_57	k__Bacteria; p__Proteobacteria; c__Betaproteobacteria; o__Burkholderiales; f__Alcaligenaceae; g__; s__	0.000764649	0.00205248	0.000885383	0.00156954	0.00185126	0.00165003	0.000845138	0.000885383	0.00112685	0.0060367	0.00583548	0.00688184	0.00177077	0.00217321	0.00209272	0.000764649	0.0015293	0.00124759	0.00201223	0.00144881	0.00108661	0.00169028	0.00128783	0.00132807	0.00104636	0.000885383	0.000885383	0.00136832	0.00140856	0.00213297	0.00104636	0.00120734	0.00124759	0.000523181	0.00068416	0.00068416	0.000643915	0.000241468	0.00068416	0.000523181	0.000804894	0.000523181	0.000160979	0.000442692	0.000764649	0.000764649	0.000442692	0.000804894
OTU_13757	k__Bacteria; p__Proteobacteria; c__Betaproteobacteria; o__Burkholderiales; f__Comamonadaceae; g__Acidovorax; s__	0.00132807	0.00124759	0.0011671	0.00112685	0.00060367	0.000764649	0.000523181	0.000482936	0.000482936	0.00338055	0.00330006	0.00265615	0.00173052	0.00136832	0.0018915	0.000402447	0.000321958	0.000724404	0.00173052	0.00245493	0.00209272	0.00374276	0.00470863	0.00458789	0.000925628	0.0011671	0.000845138	0.000845138	0.0018915	0.00112685	0.000563426	0.00068416	0.000563426	0.00120734	0.000804894	0.000482936	0.000281713	0.000442692	0.00104636	0.00173052	0.0015293	0.0011671	0.00060367	0.000160979	0.000442692	0.00233419	0.00257566	0.00309884
OTU_14938	k__Bacteria; p__Proteobacteria; c__Betaproteobacteria; o__Burkholderiales; f__Comamonadaceae; g__Acidovorax; s__	0.0011671	0.00249517	0.00100612	0.00128783	0.00144881	0.00140856	0.000442692	0.000482936	0.00068416	0.00354153	0.00446716	0.00454765	0.00160979	0.00209272	0.00185126	0.000563426	0.000321958	0.000925628	0.00281713	0.00410496	0.00297811	0.00221346	0.0018915	0.00201223	0.000643915	0.00128783	0.000482936	0.00132807	0.00148905	0.000965873	0.000845138	0.00140856	0.00128783	0.000885383	0.000925628	0.000643915	0.00068416	0.000523181	0.000885383	0.00112685	0.00108661	0.00144881	0.000764649	0.000362202	0.000241468	0.00233419	0.00237444	0.00209272
OTU_67	k__Bacteria; p__Proteobacteria; c__Gammaproteobacteria; o__Xanthomonadales; f__Xanthomonadaceae; g__Aquimonas; s__	0.00221346	0.00213297	0.00124759	0.0011671	0.00193175	0.00148905	0.00144881	0.00120734	0.00128783	0.00185126	0.00181101	0.00156954	0.00201223	0.00253542	0.00193175	0.00124759	0.00112685	0.000885383	0.0026159	0.00265615	0.00301835	0.00177077	0.00173052	0.00165003	0.00205248	0.00237444	0.00205248	0.00177077	0.0022537	0.0015293	0.00112685	0.00124759	0.00136832	0.00185126	0.00112685	0.00160979	0.00128783	0.00104636	0.00104636	0.00136832	0.00165003	0.00128783	0.000965873	0.00112685	0.00104636	0.0022537	0.00193175	0.00233419
OTU_75	k__Bacteria; p__Acidobacteria; c__Holophagae; o__Holophagales; f__Holophagaceae; g__; s__	0.00571475	0.00474887	0.00486961	0.00229395	0.00217321	0.00338055	0.00700258	0.00571475	0.00688184	0	0.000160979	0	0.00595621	0.00128783	0.00370251	0.00430618	0.00350129	0.00321958	0.000120734	0.00068416	0.000281713	0.000241468	0.000201223	0.000281713	4.02447e-05	8.04894e-05	0.000120734	0.0026159	0.0018915	0.00132807	0.00241468	0.000724404	0.00124759	0.00165003	0.00181101	0.00213297	0.000402447	0.000201223	0.000281713	0.000241468	0.000402447	0.000241468	0.000442692	0.000804894	0.000442692	0.000281713	0.000362202	0.000160979
OTU_84	k__Bacteria; p__Proteobacteria; c__Betaproteobacteria; o__Burkholderiales; f__Comamonadaceae; g__Limnobacter; s__	0.000241468	0.000160979	0.000241468	0.000321958	0.000160979	8.04894e-05	0	4.02447e-05	0.000160979	0.000362202	0.000201223	0.000201223	0.000442692	0.000523181	0.000402447	0.000120734	8.04894e-05	8.04894e-05	0.000362202	0.000482936	0.00132807	0.000160979	0.000321958	0.000281713	4.02447e-05	8.04894e-05	0	0.000160979	0.00241468	0.000523181	0.000241468	0.00173052	0.00523181	0.0391581	0.0015293	0.00128783	0.000201223	0.00527205	0.00100612	0.0022537	0.00519156	0.00156954	0.000482936	0.00229395	0	0.00386349	0.00289762	0.000321958
OTU_39	k__Bacteria; p__Bacteroidetes; c__[Saprospirae]; o__[Saprospirales]; f__Chitinophagaceae; g__; s__	0.00249517	0.0018915	0.0018915	0.0034208	0.00265615	0.0026159	0.00285737	0.00229395	0.00366227	0.00132807	0.000845138	0.00185126	0.00185126	0.00104636	0.0030586	0.00370251	0.00382325	0.00374276	0.000120734	0.000362202	0.000201223	0.00390373	0.00394398	0.00334031	0.000442692	0.00068416	0.000563426	0.00173052	0.0018915	0.00197199	0.00289762	0.00241468	0.00201223	0.00241468	0.00148905	0.00277688	0.000402447	0.00068416	0.000643915	0.000643915	0.000482936	0.000482936	0.000160979	0.000523181	0.000160979	0.000120734	8.04894e-05	0.000201223
OTU_16896	k__Bacteria; p__Proteobacteria; c__Betaproteobacteria; o__Burkholderiales; f__Comamonadaceae; g__Variovorax; s__	0.00354153	0.00237444	0.00253542	0.000965873	0.00120734	0.00108661	0.00132807	0.000965873	0.00100612	0.00173052	0.00217321	0.0018915	0.0018915	0.00173052	0.0022537	0.000845138	0.00104636	0.000724404	0.0015293	0.00442692	0.00297811	0.0018915	0.00144881	0.00173052	0.000482936	8.04894e-05	0.000281713	0.00112685	0.00124759	0.00104636	0.00144881	0.00156954	0.00140856	0.000804894	0.00068416	0.000925628	0.000201223	0.000523181	0.000925628	0.000442692	0.000724404	0.000442692	0.000160979	0.000120734	0.000201223	0.00140856	0.00112685	0.00281713
OTU_1357	k__Bacteria; p__Actinobacteria; c__Actinobacteria; o__Actinomycetales; f__Microbacteriaceae; g__Candidatus Rhodoluna; s__	0.000201223	0.000281713	0.000321958	0.000523181	0.000362202	0.000201223	0.000160979	0.000160979	0.000362202	0.013321	0.0155747	0.0132405	0.00060367	0.000160979	0.000442692	0.000402447	0.000321958	0.000321958	0.000402447	0.00068416	0.000523181	0.00454765	0.00394398	0.00346104	0.0030586	0.00177077	0.00245493	0.000241468	0.000442692	0.000764649	0.0011671	0.000563426	0.000482936	0.000523181	0.000241468	0.000724404	0.000241468	8.04894e-05	0.000201223	0.000120734	0	0.000201223	0.000120734	8.04894e-05	8.04894e-05	0.000201223	0.000120734	0.000120734
OTU_52	k__Bacteria; p__Proteobacteria; c__Betaproteobacteria; o__Burkholderiales; f__Comamonadaceae; g__Rubrivivax; s__	0.00647939	0.00470863	0.00446716	0.00136832	0.000845138	0.00144881	0.0018915	0.0018915	0.00148905	0.0100612	0.00772698	0.0079282	0.00160979	0.0015293	0.00173052	0.0011671	0.00136832	0.0015293	0.00112685	0.00144881	0.00140856	0.0011671	0.00060367	0.000925628	0.000321958	0.000523181	0.000563426	0.00124759	0.00132807	0.00100612	0.00148905	0.00112685	0.00104636	0.00144881	0.00132807	0.00136832	0.000523181	0.000402447	0.000845138	0.000120734	0.000241468	0.000160979	0.000321958	0	8.04894e-05	0.000321958	0.000281713	0.00060367
OTU_8733	k__Bacteria; p__Bacteroidetes; c__Flavobacteriia; o__Flavobacteriales; f__Cryomorphaceae; g__Fluviicola; s__	0.00173052	0.000845138	0.000845138	0.000724404	0.000523181	0.000563426	0.000845138	0.00068416	0.000563426	0.00450741	0.00253542	0.00398422	0.000402447	0.000321958	0.000201223	0.000764649	0.000724404	0.000965873	0	0.000241468	0.000160979	0.0112685	0.0107453	0.0098197	0.00104636	0.00181101	0.00140856	0.000402447	0.000482936	0.000362202	0.000925628	0.000482936	0.000482936	0.000442692	0.000321958	0.000804894	0.000160979	0.000281713	0.000321958	0.000724404	0.000523181	0.00068416	0.000643915	0.000281713	0.000563426	0.000523181	0.000120734	0.000321958
OTU_59	k__Bacteria; p__Proteobacteria; c__Alphaproteobacteria; o__Rhodobacterales; f__Rhodobacteraceae; g__Paracoccus; s__marcusii	0.00132807	0.0011671	0.00140856	0.00132807	0.00217321	0.00112685	0.000523181	0.000281713	0.00120734	0.00068416	0.000402447	0.000402447	0.000563426	0.00177077	0.000804894	0.000563426	0.000804894	0.00128783	0.00257566	0.00281713	0.000845138	0.00237444	0.00160979	0.0018915	0.011349	0.00772698	0.0102624	0.0015293	0.0030586	0.00325982	0.00104636	0.000643915	0.000643915	0.00104636	0.000885383	0.000563426	0.000804894	0.00112685	0.00104636	0.000442692	0.000281713	0.000362202	0.000523181	0.000201223	0.000281713	0.000885383	0.000442692	0.00100612
OTU_63	k__Bacteria; p__Proteobacteria; c__Alphaproteobacteria; o__Sphingomonadales; f__Erythrobacteraceae; g__; s__	0.000120734	0.000201223	8.04894e-05	0.000160979	0.000160979	0.000241468	8.04894e-05	4.02447e-05	0.000120734	0.000402447	0.000120734	0.000402447	0.000120734	0.000281713	0.000201223	0.000120734	0.000160979	0.000201223	0.00165003	0.00100612	0.000845138	0.000523181	0.000321958	0.000120734	0.000804894	0.00104636	0.00060367	0.000321958	0.000281713	0.000281713	0.000160979	0.000120734	0.000160979	0.000362202	0.000281713	8.04894e-05	0.00128783	0.0011671	0.0011671	0.0167418	0.01151	0.00853187	0.00273664	0.00321958	0.00370251	0.00583548	0.00555377	0.00382325
OTU_55	k__Bacteria; p__Proteobacteria; c__Betaproteobacteria; o__Burkholderiales; f__Oxalobacteraceae; g__Janthinobacterium; s__	0.00068416	0.000845138	0.00068416	0.000764649	0.00136832	0.000402447	0.00060367	0.00060367	0.00112685	0.000643915	0.000925628	0.000764649	0.000442692	0.00156954	0.000523181	0.000402447	0.000724404	0.00100612	0.00293786	0.00394398	0.00217321	0.00120734	0.00169028	0.000925628	0.00462814	0.00499034	0.00410496	0.00350129	0.00551352	0.00346104	0.000563426	0.00068416	0.000925628	0.00104636	0.00108661	0.00128783	0.00503059	0.00434643	0.00289762	0.000563426	0.000563426	0.000724404	0.000724404	0.00060367	0.000241468	0.0011671	0.000845138	0.000764649
OTU_6907	k__Bacteria; p__Proteobacteria; c__Betaproteobacteria; o__Burkholderiales; f__Comamonadaceae; g__Hydrogenophaga; s__	0.000321958	0.00112685	0.000442692	0.000442692	0.000764649	8.04894e-05	0	0.000120734	4.02447e-05	0.000442692	0.000643915	0.000764649	0.000482936	0.00112685	0.000362202	0.000120734	0.000241468	0.000201223	0.0189955	0.0208467	0.0130795	0.000925628	0.000965873	0.00108661	0.000482936	0.00060367	0.000321958	0.00060367	0.000925628	0.00104636	0.000724404	0.00108661	0.00060367	0.000965873	0.000965873	0.000563426	0.000241468	0.000201223	0.00136832	0.000321958	0.000563426	0.000160979	0.000442692	8.04894e-05	0	0.00060367	0.000965873	0.00193175
OTU_1981	k__Bacteria; p__Proteobacteria; c__Alphaproteobacteria; o__Sphingomonadales; f__; g__; s__	0.00124759	0.00148905	0.0011671	0.00205248	0.00313909	0.00325982	0.00144881	0.00108661	0.00253542	0.000643915	0.000523181	0.000724404	0.0022537	0.0022537	0.00229395	0.00241468	0.00213297	0.00193175	0.00394398	0.00418545	0.00350129	0.00112685	0.00132807	0.00124759	0.0011671	8.04894e-05	0.00128783	0.00229395	0.00301835	0.00289762	0.0026159	0.00362202	0.00366227	0.00132807	0.00132807	0.00213297	0.000563426	0.000241468	0.000643915	0.000885383	0.000804894	0.000724404	0.000160979	0.000160979	0.000201223	0.000321958	0.000201223	0.000241468
OTU_71	k__Bacteria; p__Actinobacteria; c__Acidimicrobiia; o__Acidimicrobiales; f__C111; g__; s__	0.00160979	0.0015293	0.00233419	0.00301835	0.00587572	0.00285737	0.00132807	0.00177077	0.00338055	0	0.000120734	0.000160979	0.00173052	0.00446716	0.00334031	0.00160979	0.00354153	0.00321958	0.000845138	0.00213297	0.000362202	0.00177077	0.00209272	0.000764649	0.000241468	0.000523181	0.000160979	0.00205248	0.00330006	0.00511108	0.00185126	0.00128783	0.00293786	0.00321958	0.000965873	0.00317933	0.00060367	0.000563426	0.000563426	0.000201223	4.02447e-05	8.04894e-05	0.000402447	0.000281713	0.000241468	0.000160979	0.000241468	0
OTU_19614	k__Bacteria; p__Bacteroidetes; c__Flavobacteriia; o__Flavobacteriales; f__Flavobacteriaceae; g__Flavobacterium; s__	0.00068416	0.000362202	0.000442692	0.00197199	0.00144881	0.00185126	0.00169028	0.00181101	0.00193175	4.02447e-05	4.02447e-05	8.04894e-05	0.00104636	0.000281713	0.00108661	0.0026159	0.00446716	0.00330006	0.000120734	0.000241468	8.04894e-05	0.000120734	8.04894e-05	0.000120734	4.02447e-05	8.04894e-05	4.02447e-05	0.00120734	0.00112685	0.00104636	0.00185126	0.00169028	0.00128783	0.00160979	0.00112685	0.00173052	0.00108661	0.000885383	0.00060367	0.00474887	0.00776722	0.00539279	0.00350129	0.00321958	0.00398422	0.00249517	0.00229395	0.00221346
OTU_20088	k__Bacteria; p__Proteobacteria; c__Betaproteobacteria; o__Burkholderiales; f__Oxalobacteraceae; g__; s__	0.00474887	0.00257566	0.00366227	0.000925628	0.00068416	0.000482936	0.00273664	0.00144881	0.0022537	0.000281713	0.000281713	0.000321958	0.00237444	0.00104636	0.00253542	0.00068416	0.000241468	0.000523181	0.00398422	0.00668062	0.003783	0.000241468	0.000120734	0.000120734	0.00269639	0.00140856	0.00253542	0.000885383	0.00132807	0.000764649	0.000321958	0.00068416	0.000442692	0.000442692	0.0018915	0.000804894	0.000724404	0.00112685	0.00112685	0.00301835	0.000321958	0.000724404	0.000563426	0.000764649	0.00068416	0.000643915	0.000804894	0.00563426
OTU_66	k__Bacteria; p__Planctomycetes; c__Planctomycetia; o__Gemmatales; f__Gemmataceae; g__; s__	0.00281713	0.00474887	0.00446716	0.00193175	0.00201223	0.00233419	0.00108661	0.00160979	0.00237444	0	0	0	0.00104636	0.00205248	0.00140856	0.00128783	0.00132807	0.0018915	0.000321958	0.000321958	4.02447e-05	0.00233419	0.0022537	0.0018915	0.000120734	4.02447e-05	0	0.00173052	0.000965873	0.000965873	0.00181101	0.000925628	0.00100612	0.00285737	0.000885383	0.00257566	0.00390373	0.00313909	0.00402447	0.000845138	0.00068416	0.000643915	0.00350129	0.0030586	0.00325982	0.00060367	0.00068416	0.000482936
OTU_20425	k__Bacteria; p__Proteobacteria; c__Alphaproteobacteria; o__Sphingomonadales; f__; g__; s__	0.00217321	0.00241468	0.00197199	0.00108661	0.00128783	0.0011671	0.000764649	0.000362202	0.00112685	0.00160979	0.00140856	0.00144881	0.000764649	0.000925628	0.00100612	0.000804894	0.00104636	0.000965873	0.00511108	0.00627817	0.0041452	0.00740502	0.00639891	0.00591597	0.000724404	0.000563426	0.000804894	0.000965873	0.00120734	0.00132807	0.00136832	0.00177077	0.00124759	0.00112685	0.00120734	0.0011671	0.000120734	0.000563426	0.000281713	0.00060367	0.000724404	0.000563426	8.04894e-05	8.04894e-05	0.000160979	0.000160979	0.000402447	8.04894e-05
OTU_9049	k__Bacteria; p__Proteobacteria; c__Gammaproteobacteria; o__Pseudomonadales; f__Moraxellaceae; g__Acinetobacter	0.000321958	0.000241468	0.000120734	0.000321958	0.00068416	0.000442692	0.000201223	4.02447e-05	0.000120734	0.000241468	0.000120734	0	0.000321958	0.0228992	0.00140856	0.000160979	0.000241468	0.000241468	0.000885383	0.000160979	0.0139247	0.000120734	0.000120734	0	0.00418545	0.00140856	0.00350129	0.0157759	0.000402447	0.000925628	0.000482936	0.000201223	0.000482936	0.000281713	0.000201223	0.000241468	0.000201223	0.000442692	0.0018915	4.02447e-05	0.000563426	0.000362202	0.000402447	0.000281713	0.000120734	0.000120734	0.000120734	0.000643915
OTU_83	k__Bacteria; p__Actinobacteria; c__Actinobacteria; o__Actinomycetales; f__ACK-M1; g__; s__	0.00108661	0.00156954	0.00124759	0.00201223	0.00100612	0.00173052	0.00257566	0.00273664	0.00156954	0.000523181	0.000362202	0.000523181	0.0018915	0.000724404	0.00173052	0.00334031	0.00289762	0.00201223	8.04894e-05	0.000160979	0.000241468	0.000281713	0.000201223	0.000281713	8.04894e-05	0.000160979	0.000321958	0.0022537	0.00201223	0.00362202	0.0030586	0.0030586	0.00205248	0.00237444	0.00297811	0.00269639	0.000160979	0.000120734	0.000241468	0.000241468	0.000201223	0.000281713	4.02447e-05	0.000402447	0.000120734	0.000160979	0.000160979	0.000160979
OTU_21	k__Bacteria; p__Proteobacteria; c__Betaproteobacteria; o__Burkholderiales; f__Comamonadaceae; g__Hydrogenophaga; s__	0.00217321	0.0026159	0.00140856	0.000925628	0.00104636	0.000321958	0.000321958	0.000281713	0.000362202	0.00185126	0.000885383	0.0015293	0.00100612	0.00205248	0.00112685	0.000362202	0.000281713	0.000281713	0.00438667	0.00672086	0.00515132	0.000804894	0.000804894	0.000885383	0.000402447	0.00358178	0.000241468	0.000965873	0.00148905	0.00104636	0.000885383	0.000563426	0.00068416	0.00068416	0.00201223	0.000362202	0.000845138	0.00068416	0.00197199	0.00293786	0.00358178	0.00241468	0.000482936	4.02447e-05	8.04894e-05	0.00249517	0.00289762	0.00313909
OTU_9724	k__Bacteria; p__Proteobacteria; c__Alphaproteobacteria; o__Sphingomonadales; f__; g__; s__	0.000885383	0.00104636	0.0011671	0.00317933	0.00354153	0.00209272	0.00156954	0.00169028	0.0030586	0	8.04894e-05	0	0.00165003	0.00201223	0.00201223	0.00293786	0.00269639	0.0026159	0.000321958	0.000281713	0.000321958	0.000241468	0.000201223	0.000201223	0.00539279	0.00197199	0.00289762	0.00281713	0.00321958	0.00426594	0.00330006	0.00366227	0.00358178	0.00177077	0.00181101	0.00245493	0.000402447	0.000402447	0.000402447	0.000201223	4.02447e-05	8.04894e-05	8.04894e-05	0.000120734	0.000241468	8.04894e-05	4.02447e-05	0
OTU_14217	k__Bacteria; p__Proteobacteria; c__Betaproteobacteria; o__Burkholderiales; f__Comamonadaceae	0.00177077	0.00221346	0.00177077	0.000482936	0.00060367	0.000523181	0.000402447	0.000160979	0.000362202	0.00257566	0.0030586	0.0022537	0.00217321	0.00144881	0.00136832	0.000402447	0.000482936	0.000523181	0.000925628	0.00205248	0.00104636	0.00273664	0.00297811	0.00366227	0.00108661	0.00273664	0.000925628	0.000925628	0.00120734	0.000965873	0.00100612	0.00128783	0.00124759	0.000362202	0.000281713	0.00060367	0.000482936	0.000482936	0.00128783	0.00132807	0.00165003	0.00177077	0.000563426	0.000281713	0.000160979	0.00253542	0.00289762	0.00193175
OTU_85	k__Bacteria; p__Planctomycetes; c__Planctomycetia; o__Planctomycetales; f__Planctomycetaceae; g__Planctomyces; s__	0.000925628	0.00100612	0.00100612	0.000201223	0.000321958	0.000201223	0	0.000402447	0.000442692	0	0	4.02447e-05	0.000120734	0.00060367	0.000362202	8.04894e-05	0.000321958	0.000764649	0.000160979	0.000160979	8.04894e-05	4.02447e-05	4.02447e-05	4.02447e-05	0.000241468	0.000201223	0.000120734	0.000201223	0.000804894	0.000764649	0.000402447	0.000160979	0.000241468	0.000402447	0.000201223	0.000201223	0.007566	0.00655988	0.00627817	0.00213297	0.00100612	0.000563426	0.0103831	0.00788796	0.0118319	0.00277688	0.0015293	0.00140856
OTU_82	k__Bacteria; p__Proteobacteria; c__Betaproteobacteria; o__Burkholderiales; f__Comamonadaceae; g__; s__	0.000845138	0.00112685	0.0011671	0.00338055	0.00454765	0.00245493	0.000804894	0.000563426	0.000965873	4.02447e-05	0.000281713	0.000120734	0.00140856	0.0011671	0.0015293	0.000724404	0.00173052	0.0015293	0.00515132	0.0112283	0.00354153	0.00120734	0.00112685	0.00233419	0.00253542	0.00273664	0.00229395	0.0018915	0.00277688	0.00173052	0.00108661	0.00132807	0.000160979	0.00104636	0.00144881	0.000442692	0.000201223	0.000281713	0.000804894	0.000120734	0.000120734	0.000201223	0.000321958	8.04894e-05	4.02447e-05	0.000523181	0.000442692	0.000241468
OTU_140	k__Bacteria; p__Actinobacteria; c__Actinobacteria; o__Actinomycetales; f__ACK-M1; g__; s__	0.00112685	0.00173052	0.000885383	0.0015293	0.000925628	0.00160979	0.00136832	0.00169028	0.00060367	0.00100612	0.00185126	0.000764649	0.000965873	0.000523181	0.000724404	0.00140856	0.00128783	0.00104636	0.000523181	0.00132807	0.00173052	0.000160979	0.000281713	0.000402447	0.000201223	0.000160979	0.000201223	0.000482936	0.000925628	0.00132807	0.00132807	0.00169028	0.00100612	0.0018915	0.00185126	0.00293786	0.000845138	0.000845138	0.00060367	0.000764649	0.000482936	0.000563426	0.000643915	0.00181101	0.00100612	0.000160979	0.000563426	0.00060367
OTU_72	k__Bacteria; p__Chloroflexi; c__Chloroflexi; o__[Roseiflexales]; f__; g__; s__	4.02447e-05	4.02447e-05	4.02447e-05	0.000120734	8.04894e-05	4.02447e-05	0.000201223	0	0.000281713	0.0297811	0.0147296	0.0245493	0.000241468	0	4.02447e-05	0.000201223	8.04894e-05	0.000241468	0	8.04894e-05	4.02447e-05	0	8.04894e-05	0	4.02447e-05	4.02447e-05	8.04894e-05	0.000160979	0	0.000160979	0.000241468	0.000120734	8.04894e-05	4.02447e-05	0	4.02447e-05	4.02447e-05	0	0.000120734	0	0	0	0.000120734	0	4.02447e-05	0.000120734	0	4.02447e-05
OTU_1348	k__Bacteria; p__Proteobacteria; c__Betaproteobacteria; o__Burkholderiales; f__Comamonadaceae	0.00229395	0.00241468	0.00338055	0.00140856	0.00140856	0.00177077	0.00169028	0.00193175	0.00108661	0.000885383	0.00104636	0.000925628	0.00241468	0.00104636	0.00177077	0.00165003	0.00165003	0.00140856	0.000402447	0.00112685	0.00136832	0.000804894	0.00100612	0.00148905	0.000442692	0.000402447	0.000321958	0.000885383	0.00068416	0.000482936	0.00156954	0.00209272	0.00156954	0.00112685	0.00104636	0.00108661	0.000482936	0.00060367	0.000764649	0.00201223	0.00173052	0.00169028	0.000925628	0.000845138	0.000885383	0.0015293	0.0011671	0.00112685
OTU_16931	k__Bacteria; p__Proteobacteria; c__Alphaproteobacteria; o__Rhodobacterales; f__Rhodobacteraceae; g__Rhodobacter; s__	0.00148905	0.000523181	0.000523181	0.000241468	0.000362202	4.02447e-05	4.02447e-05	8.04894e-05	0.000120734	0.000120734	0	4.02447e-05	0.000643915	0.00112685	0.000482936	4.02447e-05	0.000201223	0.000321958	0.0079282	0.00181101	0.00474887	4.02447e-05	8.04894e-05	4.02447e-05	0.00273664	0.00462814	0.0015293	0.000402447	0.00177077	0.000563426	0.000281713	0.000402447	0.000321958	0.00108661	0.00249517	0.000160979	0.000402447	0.000201223	0.000281713	0.000160979	4.02447e-05	0.000362202	0.00124759	0.000120734	0	0.0011671	0.00104636	0.0276079
OTU_15016	k__Bacteria; p__Proteobacteria; c__Alphaproteobacteria; o__Rhodobacterales; f__Rhodobacteraceae; g__Rhodobacter; s__	0.00124759	0.00140856	0.00165003	0.000362202	0.000563426	0.000281713	0.000241468	0.000281713	0.000281713	0.000885383	0.00068416	0.000482936	0.000724404	0.000764649	0.00060367	0.000160979	0.000321958	0.00068416	0.00901481	0.00237444	0.00309884	0.00330006	0.00370251	0.00201223	0.00325982	0.00330006	0.00281713	0.000442692	0.0015293	0.000885383	0.000482936	0.000643915	0.00144881	0.000563426	0.00132807	0.00068416	0.000724404	0.000442692	0.000402447	0.000201223	0.000160979	0.000160979	0.000643915	0.000281713	0.000160979	0.00104636	0.000804894	0.00985995
OTU_64	k__Bacteria; p__Actinobacteria; c__Acidimicrobiia; o__Acidimicrobiales; f__C111; g__; s__	0.000321958	0.000925628	0.0015293	0.000321958	0.000362202	0.000482936	0.000362202	0.000523181	0.00068416	0	4.02447e-05	0.000120734	0.000321958	0.000523181	0.000321958	0.000402447	0.000241468	4.02447e-05	0.000281713	0.000201223	0.000241468	0.000201223	0.000281713	4.02447e-05	4.02447e-05	8.04894e-05	0	0.000362202	0.000201223	0.000402447	0.000442692	0.000321958	8.04894e-05	0.00060367	0.000241468	0.000563426	0.00293786	0.00293786	0.00297811	0.00205248	0.00237444	0.00386349	0.0049501	0.0068416	0.00772698	0.00144881	0.00808918	0.00148905
OTU_43	k__Bacteria; p__Proteobacteria; c__Betaproteobacteria; o__Burkholderiales; f__Comamonadaceae	0.00132807	0.00120734	0.00124759	0.00128783	0.000965873	0.000965873	0.000925628	0.00060367	0.000643915	0.00132807	0.00124759	0.00140856	0.00124759	0.00148905	0.00156954	0.000845138	0.0011671	0.000845138	0.00205248	0.00177077	0.0022537	0.00108661	0.00136832	0.0011671	0.00136832	0.00156954	0.00104636	0.00124759	0.00136832	0.00148905	0.000764649	0.00100612	0.00120734	0.000845138	0.00185126	0.00112685	0.00120734	0.00140856	0.00108661	0.00120734	0.00136832	0.00140856	0.00108661	0.000885383	0.000764649	0.00253542	0.0022537	0.0022537
OTU_11869	k__Bacteria; p__Proteobacteria; c__Betaproteobacteria; o__Neisseriales; f__Neisseriaceae; g__Vogesella; s__	0.000241468	0.000321958	0.000201223	8.04894e-05	0	0.000120734	4.02447e-05	4.02447e-05	4.02447e-05	4.02447e-05	0.000120734	4.02447e-05	0.0011671	0.00177077	0.000241468	4.02447e-05	8.04894e-05	4.02447e-05	0.0306665	0.0068416	0.0156552	0.000201223	8.04894e-05	0.000201223	0.000120734	0.000724404	8.04894e-05	0.000563426	0.000523181	0.000120734	4.02447e-05	4.02447e-05	0.000120734	0.000120734	8.04894e-05	8.04894e-05	4.02447e-05	8.04894e-05	0.000160979	0.000201223	0.000201223	4.02447e-05	8.04894e-05	0.000120734	8.04894e-05	0.000885383	0.000885383	0.00503059
OTU_1706	k__Bacteria; p__Proteobacteria; c__Betaproteobacteria; o__Burkholderiales; f__Comamonadaceae; g__Limnohabitans; s__	0.000845138	0.00128783	0.0011671	0.00136832	0.00068416	0.00160979	0.00112685	0.00120734	0.00104636	0.000442692	0.00112685	0.00128783	0.00160979	0.00068416	0.00160979	0.00120734	0.00156954	0.00148905	0.000523181	0.000925628	0.00112685	0.00104636	0.00104636	0.00108661	0.000241468	0.000724404	0.000321958	0.00104636	0.00100612	0.00060367	0.00132807	0.0011671	0.00104636	0.00165003	0.000965873	0.000845138	0.0011671	0.000885383	0.00148905	0.00209272	0.00197199	0.0026159	0.000885383	0.00201223	0.00209272	0.00112685	0.00124759	0.00100612
OTU_2502	k__Bacteria; p__Proteobacteria; c__Alphaproteobacteria; o__Rhodospirillales; f__Acetobacteraceae; g__; s__	0.00144881	0.00128783	0.00104636	0.00132807	0.00144881	0.00169028	0.00112685	0.000845138	0.00173052	4.02447e-05	8.04894e-05	4.02447e-05	0.00120734	0.00148905	0.00217321	0.00197199	0.00273664	0.00269639	0.000201223	0.000845138	0.000563426	0.000402447	0.000321958	0.000442692	0.000201223	0	8.04894e-05	0.00112685	0.00112685	0.00185126	0.0026159	0.00136832	0.0018915	0.00273664	0.00124759	0.00193175	0.0015293	0.00148905	0.00177077	0.00197199	0.00173052	0.00233419	0.00165003	0.00221346	0.00201223	0.00120734	0.000804894	0.00068416
OTU_14416	k__Bacteria; p__Proteobacteria; c__Alphaproteobacteria; o__Rhodobacterales; f__Rhodobacteraceae; g__Rhodobacter; s__	0.000965873	0.0011671	0.00060367	0.000482936	0.000925628	0.000482936	0.000241468	0.000120734	0.000563426	0.000241468	0.000160979	0.000201223	0.000362202	0.000804894	0.000925628	0.000321958	0.000764649	0.00100612	0.00237444	0.00289762	0.00060367	0.00148905	0.00156954	0.000965873	0.007566	0.00209272	0.00482936	0.000563426	0.00148905	0.00140856	0.000281713	0.000523181	0.000402447	0.000563426	0.000442692	0.000321958	0.000402447	0.000402447	0.000362202	0.000160979	0.000160979	4.02447e-05	0.00060367	0.00060367	0.000321958	0.00148905	0.000925628	0.00104636
OTU_10177	k__Bacteria; p__Proteobacteria; c__Betaproteobacteria; o__Burkholderiales; f__Comamonadaceae; g__Hydrogenophaga; s__	0.00100612	0.00136832	0.00100612	0.000402447	0.000201223	4.02447e-05	0.000120734	8.04894e-05	8.04894e-05	0.00237444	0.00120734	0.00144881	0.00410496	0.00273664	0.00470863	4.02447e-05	0.000120734	0.000925628	0.00390373	0.00941726	0.00293786	0.00124759	0.00120734	0.000724404	8.04894e-05	0.000160979	0.000120734	0.00120734	0.000724404	0.000804894	0.000402447	0.00060367	0.00136832	0.000362202	0.000442692	0.000201223	0.000643915	0.000523181	0.0011671	0.000362202	0.000201223	0.000362202	0.00140856	0.000201223	0	0.00438667	0.00507083	0.00446716
OTU_62	k__Bacteria; p__Proteobacteria; c__Gammaproteobacteria; o__Pseudomonadales; f__Pseudomonadaceae; g__Pseudomonas	0.00120734	0.0015293	0.00104636	0.00112685	0.000724404	0.00120734	0.00120734	0.00128783	0.00104636	0.00156954	0.00173052	0.00120734	0.00128783	0.00144881	0.0015293	0.000885383	0.00144881	0.000885383	0.00209272	0.00173052	0.00217321	0.00136832	0.000845138	0.00136832	0.000764649	0.0015293	0.00108661	0.00124759	0.00148905	0.00120734	0.000643915	0.00104636	0.00144881	0.00140856	0.00148905	0.00140856	0.000804894	0.000845138	0.00108661	0.00104636	0.00112685	0.0015293	0.000482936	0.00108661	0.00112685	0.00104636	0.00128783	0.00144881
OTU_8	k__Bacteria; p__Cyanobacteria; c__Chloroplast; o__Stramenopiles; f__; g__; s__	0.00386349	0.00201223	0.00358178	0.00281713	0.0022537	0.0026159	0.00358178	0.003783	0.00269639	0.000160979	0.000321958	0.000442692	0.00060367	0.000321958	0.000804894	0.0022537	0.00265615	0.00257566	0	0.000321958	0	0.00104636	0.00160979	0.00124759	0	0.000241468	8.04894e-05	0.00140856	0.00100612	0.000643915	0.00108661	0.00197199	0.00100612	0.00124759	0.00104636	0.00181101	0.00120734	0.000643915	0.00128783	0.00173052	0.00165003	0.00144881	0.0011671	0.000241468	0.000362202	8.04894e-05	0.000160979	0.000120734
OTU_77	k__Bacteria; p__Verrucomicrobia; c__Opitutae; o__Opitutales; f__Opitutaceae; g__Opitutus; s__	0.00120734	0.00104636	0.00112685	0.00100612	0.00100612	0.00217321	0.00233419	0.00213297	0.00418545	0	4.02447e-05	0	0.0018915	8.04894e-05	0.00173052	0.00313909	0.0034208	0.00297811	0	0.000362202	0.000201223	0.00185126	0.00165003	0.0015293	8.04894e-05	0.000241468	0.000120734	0.0034208	0.00205248	0.00132807	0.00221346	0.00156954	0.00100612	0.00221346	0.00124759	0.0018915	0.00160979	0.00160979	0.00201223	8.04894e-05	0.000281713	0.000160979	0.000885383	0.000845138	0.00112685	0.000120734	0.000120734	4.02447e-05
OTU_3971	k__Bacteria; p__Proteobacteria; c__Betaproteobacteria; o__Methylophilales; f__Methylophilaceae; g__; s__	0.000764649	0.000523181	0.0011671	0.00108661	0.00148905	0.00177077	0.00209272	0.00165003	0.00177077	0.000321958	0.000563426	0.00068416	0.0018915	0.000563426	0.00173052	0.00173052	0.00169028	0.0011671	0.000160979	0.000482936	0.000442692	0.000362202	0.000482936	0.000442692	4.02447e-05	8.04894e-05	0	0.00112685	0.00156954	0.000523181	0.00173052	0.00169028	0.00132807	0.00201223	0.00269639	0.00229395	0.00160979	0.00136832	0.0011671	0.00112685	0.00104636	0.00156954	0.000724404	0.00249517	0.00124759	0.000281713	0.000764649	0.00068416
OTU_16915	k__Bacteria; p__Proteobacteria; c__Betaproteobacteria; o__Burkholderiales; f__Comamonadaceae; g__Paucibacter; s__	0.00165003	0.0015293	0.0018915	0.00068416	0.000643915	0.000281713	0.000804894	0.000442692	0.000160979	0.000764649	0.000804894	0.00060367	0.000804894	0.00148905	0.000563426	4.02447e-05	0.000321958	0.000362202	0.00112685	0.000925628	0.00169028	0.000523181	0.000482936	0.000925628	0.000442692	0.000643915	0.000362202	0.000724404	0.00112685	0.000845138	0.000845138	0.00060367	0.00124759	0.00156954	0.00776722	0.000241468	0.00124759	0.00132807	0.0011671	0.00144881	0.00112685	0.000724404	0.00104636	0.000442692	0.000201223	0.00635866	0.0049501	0.00402447
OTU_14340	k__Bacteria; p__Proteobacteria; c__Alphaproteobacteria; o__Rhodobacterales; f__Rhodobacteraceae; g__Rhodobacter; s__	0.000482936	0.00060367	0.000442692	0.000845138	0.00132807	0.000523181	0.000160979	0.000321958	0.000482936	0.000281713	0.000160979	8.04894e-05	0.000321958	0.000965873	0.000160979	0.000321958	0.000724404	0.000925628	0.00201223	0.00334031	0.00108661	0.000965873	0.000442692	0.000764649	0.0127978	0.0090953	0.00929652	0.000925628	0.0034208	0.0018915	0.000724404	0.000362202	0.000643915	0.000563426	0.0015293	0.000402447	0.000523181	0.000402447	0.000643915	0.000160979	4.02447e-05	8.04894e-05	0.000563426	0.000120734	4.02447e-05	0.000160979	0.000120734	0.000442692
OTU_91	k__Bacteria; p__Proteobacteria; c__Alphaproteobacteria; o__Rhizobiales; f__Xanthobacteraceae; g__; s__	0.0011671	0.00160979	0.00104636	0.0011671	0.00160979	0.000925628	0.00136832	0.000885383	0.00100612	0.00112685	0.00108661	0.000764649	0.00132807	0.00169028	0.00112685	0.000965873	0.000965873	0.00108661	0.00185126	0.00185126	0.00144881	0.00104636	0.000925628	0.000885383	0.00201223	0.00148905	0.00205248	0.00112685	0.00104636	0.00120734	0.000965873	0.00112685	0.00100612	0.000845138	0.00112685	0.00108661	0.00136832	0.00100612	0.00156954	0.000885383	0.00112685	0.000764649	0.0011671	0.00104636	0.000885383	0.000965873	0.0011671	0.00128783
OTU_10044	k__Bacteria; p__Proteobacteria; c__Betaproteobacteria; o__Burkholderiales; f__Comamonadaceae	0.00209272	0.0011671	0.00177077	0.00060367	0.000804894	0.000281713	0.000362202	0.000442692	0.000845138	0.00068416	0.00060367	0.000482936	0.00112685	0.00108661	0.000764649	0.000925628	0.000724404	0.000563426	0.0104636	0.0144881	0.00466838	0.000402447	0.000402447	0.000442692	0.000281713	0.00209272	0.000201223	0.000845138	0.00136832	0.00100612	0.00068416	0.000643915	0.00104636	0.000643915	0.000643915	0.000362202	0.000241468	0.000362202	0.000442692	0.000281713	0.000402447	0.000160979	0.000362202	8.04894e-05	0.000201223	0.000523181	0.00068416	0.000643915
OTU_5079	k__Bacteria; p__Proteobacteria; c__Betaproteobacteria; o__Burkholderiales; f__Comamonadaceae; g__Hydrogenophaga; s__	0.000724404	0.00148905	0.000885383	0.000885383	0.000563426	0.000321958	0.000523181	0.000804894	0.000482936	0.000563426	0.000362202	0.000482936	0.00100612	0.000523181	0.00132807	0.000362202	0.000362202	0.000563426	0.000845138	0.00297811	0.00120734	0.000442692	0.000281713	0.000563426	8.04894e-05	0.000120734	8.04894e-05	0.000563426	0.000402447	0.000281713	0.000643915	0.000643915	0.000925628	0.000362202	0.000643915	0.000362202	0.000724404	0.000523181	0.000643915	0.00317933	0.0026159	0.00334031	0.0011671	0.000925628	0.00132807	0.00148905	0.00217321	0.00257566
OTU_96	k__Bacteria; p__Bacteroidetes; c__Flavobacteriia; o__Flavobacteriales; f__Cryomorphaceae; g__Fluviicola; s__	0.000523181	0.000120734	4.02447e-05	0.000965873	0.000804894	0.00132807	0.000925628	0.000724404	0.00060367	0.000201223	0.000241468	0.000321958	0.000523181	0.000160979	0.000321958	0.000965873	0.000804894	0.000724404	4.02447e-05	4.02447e-05	0.000160979	4.02447e-05	0.000201223	0.000120734	4.02447e-05	0	0	0.000241468	0.000321958	0.000241468	0.000643915	0.000402447	0.000321958	0.000402447	0.000241468	0.000201223	0.000724404	0.000523181	0.00068416	0.00845138	0.0101014	0.00833065	0.00611719	0.00503059	0.00587572	0.000523181	0.000845138	0.000885383
OTU_94	k__Bacteria; p__Bacteroidetes; c__Flavobacteriia; o__Flavobacteriales; f__Flavobacteriaceae; g__Flavobacterium; s__	0.00100612	0.000442692	0.000885383	0.00112685	0.00108661	0.00177077	0.00120734	0.00128783	0.00108661	0.000885383	0.00068416	0.000563426	0.00112685	0.000804894	0.00100612	0.00140856	0.00197199	0.00221346	0.00060367	0.000965873	0.00104636	0.00301835	0.00245493	0.00177077	0.00132807	0.000965873	0.000885383	0.000845138	0.0011671	0.00100612	0.00112685	0.0011671	0.0011671	0.000885383	0.00124759	0.000885383	0.000724404	0.000523181	0.000643915	0.00100612	0.00112685	0.00140856	0.00201223	0.00128783	0.00173052	0.00112685	0.000724404	0.000965873
OTU_17888	k__Bacteria; p__Cyanobacteria; c__Synechococcophycideae; o__Synechococcales; f__Synechococcaceae; g__Synechococcus; s__	8.04894e-05	0.00060367	0.000523181	4.02447e-05	8.04894e-05	0	4.02447e-05	0.000241468	0.000120734	4.02447e-05	4.02447e-05	0	8.04894e-05	0.000120734	4.02447e-05	4.02447e-05	0.000241468	0.000160979	0	0	4.02447e-05	4.02447e-05	0	4.02447e-05	0	0	0	0.000120734	0.000120734	4.02447e-05	0.000120734	4.02447e-05	0.000120734	0.000241468	0	0.000321958	0.0105844	0.00925628	0.00969897	0.00849163	0.00539279	0.00664037	0.00173052	0.00193175	0.00169028	0.000563426	0.00060367	0.000201223
OTU_51	k__Bacteria; p__Proteobacteria; c__Betaproteobacteria; o__Methylophilales; f__Methylophilaceae; g__; s__	0.000120734	0.000281713	8.04894e-05	0.000160979	8.04894e-05	0.000120734	0.000402447	0.000120734	0.000160979	0.00482936	0.0041452	0.00478912	8.04894e-05	8.04894e-05	0.000201223	4.02447e-05	0.000201223	0.000120734	0	0	0.000120734	0.00120734	0.00124759	0.00112685	0.000201223	0.000281713	4.02447e-05	0	0.000281713	4.02447e-05	0.000160979	0.000120734	0.000160979	0.000160979	0.000120734	8.04894e-05	0.000201223	8.04894e-05	8.04894e-05	4.02447e-05	0.000160979	4.02447e-05	4.02447e-05	4.02447e-05	8.04894e-05	8.04894e-05	8.04894e-05	0.000160979
OTU_90	k__Bacteria; p__Proteobacteria; c__Gammaproteobacteria; o__Pseudomonadales; f__Pseudomonadaceae	0.00120734	0.00120734	0.000885383	0.00100612	0.000764649	0.00124759	0.0011671	0.000845138	0.000885383	0.00165003	0.00112685	0.00124759	0.00104636	0.0022537	0.000965873	0.000885383	0.000804894	0.000925628	0.00205248	0.00104636	0.00245493	0.00156954	0.00124759	0.0011671	0.00140856	0.00140856	0.00169028	0.00108661	0.00112685	0.00100612	0.00068416	0.000925628	0.000845138	0.00100612	0.00124759	0.000643915	0.00136832	0.00112685	0.000643915	0.00112685	0.000643915	0.0015293	0.000523181	0.000804894	0.000523181	0.00181101	0.00108661	0.00120734
OTU_80	k__Bacteria; p__Verrucomicrobia; c__Verrucomicrobiae; o__Verrucomicrobiales; f__Verrucomicrobiaceae; g__; s__	0.000764649	0.000885383	0.00124759	0.00217321	0.00406471	0.00358178	0.00068416	0.000643915	0.00241468	0.000643915	0.000402447	0.000885383	0.00144881	0.00229395	0.00185126	0.00120734	0.00237444	0.0026159	0.000160979	0.000160979	8.04894e-05	0.00120734	0.0011671	0.000523181	0.00136832	0.000643915	0.000643915	0.0041452	0.00317933	0.00563426	0.00193175	0.00136832	0.00136832	0.00148905	0.000845138	0.00132807	0.00108661	0.000885383	0.00060367	8.04894e-05	0	0	0.000201223	0.000563426	0.000482936	0	4.02447e-05	0
OTU_65	k__Bacteria; p__Bacteroidetes; c__Sphingobacteriia; o__Sphingobacteriales; f__; g__; s__	0.00112685	0.000442692	0.00060367	0.00128783	0.00181101	0.00313909	0.00325982	0.00277688	0.00293786	4.02447e-05	0	0.000120734	0.00233419	0.000643915	0.00209272	0.00229395	0.00426594	0.00390373	0.000120734	8.04894e-05	0	4.02447e-05	0.000160979	4.02447e-05	4.02447e-05	0	4.02447e-05	0.00317933	0.00245493	0.0015293	0.00281713	0.00253542	0.00209272	0.00221346	0.00120734	0.00181101	0.000160979	0.000120734	8.04894e-05	0.000241468	8.04894e-05	8.04894e-05	0.00173052	0.00156954	0.00197199	0.000362202	0.000563426	0.000201223
OTU_6173	k__Bacteria; p__Actinobacteria; c__Actinobacteria; o__Actinomycetales; f__ACK-M1; g__; s__	0.00100612	0.00124759	0.00104636	0.00144881	0.000925628	0.00181101	0.00221346	0.00249517	0.00144881	4.02447e-05	0.000201223	8.04894e-05	0.00177077	0.000281713	0.00112685	0.00197199	0.0015293	0.0015293	0	8.04894e-05	0.000160979	8.04894e-05	0.000201223	0.000362202	0	0	0	0.000804894	0.000965873	0.000845138	0.00165003	0.00169028	0.00173052	0.000845138	0.00132807	0.00160979	0.00140856	0.00120734	0.00112685	0.000764649	0.000845138	0.00128783	0.00148905	0.00273664	0.00245493	0.000724404	0.000925628	0.00108661
OTU_56	k__Bacteria; p__Proteobacteria; c__Alphaproteobacteria; o__Caulobacterales; f__Caulobacteraceae; g__Brevundimonas; s__diminuta	0.00112685	0.00104636	0.000885383	0.000643915	0.0011671	0.00128783	0.00140856	0.000804894	0.000845138	0.000885383	0.000925628	0.00112685	0.0011671	0.00148905	0.00104636	0.00120734	0.00100612	0.00100612	0.00140856	0.0011671	0.00144881	0.00165003	0.000764649	0.000845138	0.00165003	0.00193175	0.0011671	0.000804894	0.00104636	0.00100612	0.000885383	0.000965873	0.00108661	0.00060367	0.00104636	0.000925628	0.00108661	0.00120734	0.00112685	0.000965873	0.00124759	0.00144881	0.000643915	0.00108661	0.00144881	0.00124759	0.00100612	0.00112685
OTU_14214	k__Bacteria; p__Proteobacteria; c__Betaproteobacteria; o__Burkholderiales; f__Comamonadaceae; g__Hydrogenophaga; s__	0.00060367	0.00112685	0.000885383	0.000321958	0.000362202	0.000362202	0.000160979	0.000120734	8.04894e-05	0.0011671	0.000925628	0.000885383	0.000442692	0.000845138	0.000281713	0.000120734	0.000120734	0.000482936	0.00784771	0.00913554	0.00668062	0.000523181	0.000643915	0.00124759	8.04894e-05	0.000643915	0.000201223	0.000845138	0.0011671	0.000724404	0.000281713	0.000241468	0.000804894	0.000804894	0.0015293	0.000241468	0.000362202	0.000201223	0.00169028	0.00169028	0.00177077	0.00201223	0.000643915	8.04894e-05	8.04894e-05	0.00173052	0.0018915	0.00233419
OTU_88	k__Bacteria; p__Actinobacteria; c__Acidimicrobiia; o__Acidimicrobiales; f__; g__; s__	0.000965873	0.00120734	0.00124759	0.00144881	0.00197199	0.0022537	0.000764649	0.00060367	0.0018915	4.02447e-05	4.02447e-05	0.000201223	0.000804894	0.00144881	0.000965873	0.00112685	0.0015293	0.0011671	0.000563426	0.00108661	0.000563426	0.000965873	0.00140856	0.00060367	0.000563426	0.00068416	0.000523181	0.00112685	0.00233419	0.0026159	0.000925628	0.000845138	0.000724404	0.00177077	0.00108661	0.00120734	0.00140856	0.00148905	0.000965873	0.000402447	0.000402447	0.000402447	0.00104636	0.000925628	0.00124759	0.000120734	0.000845138	0.000160979
OTU_60	k__Bacteria; p__Proteobacteria; c__Betaproteobacteria; o__Burkholderiales; f__Comamonadaceae; g__; s__	0.00120734	0.00177077	0.0011671	0.000804894	0.00068416	0.000120734	0.000241468	0.000362202	0.000523181	0.000563426	0.000362202	0.000442692	0.000764649	0.00201223	0.000482936	0.000442692	0.000482936	0.000241468	0.00245493	0.0018915	0.00390373	0.000523181	0.00068416	0.000442692	0.000442692	0.00229395	0.000523181	0.00205248	0.00193175	0.00140856	0.0015293	0.00156954	0.000362202	0.00325982	0.00708307	0.0022537	0.00108661	0.000845138	0.00144881	0.000643915	0.000724404	0.000362202	0.000925628	0.000402447	8.04894e-05	0.00201223	0.000643915	0.00112685
OTU_20473	k__Bacteria; p__Proteobacteria; c__Betaproteobacteria; o__Burkholderiales; f__Comamonadaceae; g__; s__	0.00068416	0.00060367	0.000402447	0.000482936	0.000804894	0.000563426	0.000201223	0.000321958	0.000120734	8.04894e-05	0.000201223	0.000160979	0.000563426	0.00197199	0.00177077	0.000160979	0.000362202	0.000160979	0.000201223	0.000201223	0.000523181	0.000362202	0.000160979	0.000321958	0.000120734	0.000120734	0.000201223	0.00297811	0.000402447	0.000281713	0.000442692	0.000362202	0.000845138	0.000442692	0.00672086	0.0015293	0.00338055	0.0026159	0.000362202	0.00237444	0.000281713	0.00128783	0.00144881	0.0030586	0.000241468	0.0060367	0.000402447	0.000885383
OTU_101	k__Bacteria; p__Proteobacteria; c__Alphaproteobacteria; o__Sphingomonadales; f__Sphingomonadaceae; g__; s__	0.00321958	0.00382325	0.00245493	0.00128783	0.00128783	0.000845138	0.000643915	0.00068416	0.00108661	0.000523181	0.000321958	0.000362202	0.000804894	0.00060367	0.00100612	0.000885383	0.000643915	0.000764649	0.000362202	0.000321958	0.00060367	0.00269639	0.00265615	0.00205248	0.00120734	0.0011671	0.00160979	0.000643915	0.00060367	0.00128783	0.000885383	0.00104636	0.000925628	0.000563426	0.000321958	0.000643915	0.000442692	0.000563426	0.000362202	0.000362202	0.000362202	0.000362202	0.000201223	0	0.000160979	0.000321958	0.000120734	4.02447e-05
OTU_1035	k__Bacteria; p__Bacteroidetes; c__Flavobacteriia; o__Flavobacteriales; f__Cryomorphaceae; g__; s__	4.02447e-05	4.02447e-05	0	0.00221346	0.00140856	0.00181101	0.0026159	0.00213297	0.00193175	4.02447e-05	4.02447e-05	0	0.00165003	0.000402447	0.00160979	0.00293786	0.00370251	0.0034208	0.000160979	0.000281713	0	0	4.02447e-05	0.000120734	0	0	4.02447e-05	0.00229395	0.00144881	0.00124759	0.00434643	0.00325982	0.00277688	0.00201223	0.0015293	0.00213297	0.00100612	0.00068416	0.000965873	0.000845138	0.00124759	0.00100612	0.000724404	0.000845138	0.00112685	0.000563426	0.000362202	0.000201223
OTU_81	k__Bacteria; p__Proteobacteria; c__Betaproteobacteria; o__Rhodocyclales; f__Rhodocyclaceae; g__Azovibrio; s__	0.000362202	0.000845138	0.000523181	0.0015293	0.00209272	0.00124759	0.000321958	0.00068416	0.000563426	0.000362202	0.000362202	0.000362202	0.000563426	0.000925628	0.00136832	0.000402447	0.000764649	0.000804894	0.000362202	0.00068416	0.000442692	0.000845138	0.00124759	0.00060367	0.00442692	0.00470863	0.00422569	0.00132807	0.00490985	0.00245493	0.000965873	0.000845138	0.000160979	0.00177077	0.00165003	0.000563426	0.00060367	0.000402447	0.00148905	0.000160979	0.000201223	0.000241468	4.02447e-05	0.000120734	0	0.000885383	0.000442692	0.00060367
OTU_11972	k__Bacteria; p__Proteobacteria; c__Betaproteobacteria; o__Burkholderiales; f__Comamonadaceae; g__Variovorax; s__	0.0015293	0.00148905	0.00193175	0.000885383	0.00112685	0.00068416	0.000845138	0.000402447	0.000643915	0.00148905	0.00156954	0.00185126	0.00156954	0.000523181	0.00185126	0.000523181	0.000845138	0.000724404	0.00108661	0.00382325	0.00197199	0.000925628	0.00060367	0.000965873	0.000362202	0.000402447	0.000442692	0.00108661	0.000482936	0.000402447	0.000925628	0.000643915	0.000764649	0.000362202	0.000523181	0.000281713	0.000402447	0.00068416	0.000482936	0.000321958	0.000402447	0.000321958	8.04894e-05	0.000160979	8.04894e-05	0.000523181	0.00060367	0.00160979
OTU_100	k__Bacteria; p__Cyanobacteria; c__Chloroplast; o__Chlorophyta; f__Chlamydomonadaceae; g__; s__	0.00100612	0.00100612	0.00173052	0.00177077	0.00148905	0.00128783	0.00165003	0.00160979	0.00374276	0.000362202	0.000241468	0.000160979	0.000563426	0.000804894	0.000965873	0.00177077	0.00217321	0.00245493	0.000321958	0.000321958	8.04894e-05	0.000201223	0.000402447	4.02447e-05	0.000402447	0.000160979	0.000120734	0.00156954	0.000643915	0.0011671	0.00100612	0.000402447	0.00112685	0.00124759	0.000201223	0.00136832	0.00297811	0.00205248	0.00205248	0.00160979	0.000764649	0.000965873	0.0060367	0.000764649	0.00177077	0.00060367	0.000482936	0.000241468
OTU_20362	k__Bacteria; p__Bacteroidetes; c__[Saprospirae]; o__[Saprospirales]; f__Chitinophagaceae; g__; s__	0.00060367	0.000965873	0.00108661	0.000120734	0.000120734	0.000442692	0.000925628	0.000482936	0.000764649	8.04894e-05	0	8.04894e-05	0.000724404	0.000523181	0.000804894	0.000764649	0.000724404	0.00128783	8.04894e-05	0.000241468	4.02447e-05	0.000241468	0.000120734	4.02447e-05	8.04894e-05	0	4.02447e-05	0.000362202	0.000482936	0.000241468	0.00068416	0.00060367	0.000523181	0.0015293	0.00148905	0.00140856	0.00177077	0.0011671	0.00136832	0.00426594	0.0041452	0.00394398	0.00418545	0.00301835	0.00358178	0.00185126	0.00136832	0.00148905
OTU_6267	k__Bacteria; p__Proteobacteria; c__Betaproteobacteria; o__Burkholderiales; f__Comamonadaceae; g__Comamonas; s__	0.00237444	0.00181101	0.00217321	0.00068416	0.000402447	0.00068416	0.000442692	0.000643915	0.000362202	0.00140856	0.00136832	0.000965873	0.00177077	0.000925628	0.00120734	0.000120734	0.000482936	0.00060367	0.0049501	0.00808918	0.00390373	0.000402447	0.000764649	0.000724404	0.000482936	0.00213297	0.00108661	0.000482936	0.00132807	0.00068416	0.000402447	0.000442692	0.00165003	0.000362202	0.000764649	0.000362202	0.000281713	0.000241468	0.000402447	0.000442692	0.000643915	0.000482936	0.000362202	0.000120734	0	0.00104636	0.00128783	0.00108661
OTU_116	k__Bacteria; p__Bacteroidetes; c__Flavobacteriia; o__Flavobacteriales; f__Cryomorphaceae; g__; s__	0.00382325	0.00317933	0.00301835	0.00245493	0.00358178	0.00265615	0.00257566	0.00362202	0.0034208	0.000643915	0.000160979	0.000402447	0.00173052	0.0015293	0.00233419	0.00205248	0.00366227	0.00394398	0	0.000402447	4.02447e-05	0.000120734	0.000160979	0	0.000120734	4.02447e-05	4.02447e-05	0.00136832	0.000804894	0.000845138	0.00104636	0.00060367	0.000321958	0.000442692	0.000442692	0.000482936	0.000563426	0.000362202	0.000764649	0.000201223	0.000160979	0.000281713	0.000160979	8.04894e-05	0	0.000201223	0.000120734	0.000160979
OTU_12579	k__Bacteria; p__Proteobacteria; c__Alphaproteobacteria; o__Sphingomonadales; f__Sphingomonadaceae; g__Novosphingobium; s__	0.000281713	0.000362202	0.000160979	0.000241468	0.000402447	0.000160979	4.02447e-05	0.000160979	8.04894e-05	8.04894e-05	0.000120734	0.000160979	0.000160979	0.000160979	0.000120734	8.04894e-05	0.000160979	0.000402447	0.00309884	0.00249517	0.00068416	0.00160979	0.00124759	0.00120734	0.0155747	0.00611719	0.0103026	0.000241468	0.00241468	0.00140856	0.000201223	0.000362202	0.000281713	0.00108661	0.000724404	0.000482936	0.000160979	0.000241468	0.000241468	0	8.04894e-05	4.02447e-05	0.000563426	0.000120734	0	0	0.000120734	0.000120734
OTU_12814	k__Bacteria; p__Proteobacteria; c__Alphaproteobacteria; o__Sphingomonadales; f__; g__; s__	0.000885383	0.00120734	0.00136832	0.000804894	0.00144881	0.0011671	0.00068416	0.000402447	0.00104636	0.000764649	0.000885383	0.00132807	0.000523181	0.000362202	0.00068416	0.00068416	0.000563426	0.000523181	0.00338055	0.00362202	0.0030586	0.00394398	0.00519156	0.00426594	0.000523181	0.000281713	0.000241468	0.000563426	0.000885383	0.000724404	0.000845138	0.0011671	0.00120734	0.000764649	0.000724404	0.000804894	0.000201223	0.000201223	0.000281713	0.000442692	0.000482936	0.000362202	0.000241468	0.000160979	0.000120734	0.000201223	0.000160979	4.02447e-05
OTU_79	k__Bacteria; p__Proteobacteria; c__Alphaproteobacteria; o__Rhizobiales; f__Rhizobiaceae; g__Agrobacterium; s__	0.000442692	0.000442692	0.000563426	0.000201223	0.000160979	4.02447e-05	4.02447e-05	4.02447e-05	8.04894e-05	0.000321958	0.000321958	0.000523181	0.000241468	0.00120734	0.000120734	8.04894e-05	0.000160979	0.000201223	0.00591597	0.0015293	0.00998068	0.000563426	0.000201223	8.04894e-05	0.00104636	0.00434643	0.000281713	0.000241468	0.000925628	0.000201223	0.000201223	0.000241468	0.000442692	0.000804894	0.000281713	0	0.00128783	0.00120734	0.00060367	0.000925628	0.000523181	0.000925628	0.000442692	8.04894e-05	8.04894e-05	0.00136832	0.00515132	0.00857212
OTU_14296	k__Bacteria; p__Proteobacteria; c__Betaproteobacteria; o__Burkholderiales; f__Comamonadaceae; g__Hydrogenophaga; s__	0.00104636	0.00156954	0.000925628	0.000120734	0.000201223	0.000160979	4.02447e-05	0.000120734	0.000120734	0.0018915	0.00140856	0.00169028	0.00156954	0.00060367	0.000885383	0	4.02447e-05	0.00068416	0.00382325	0.00519156	0.00237444	0.000804894	0.000563426	0.00068416	0.000160979	0.000281713	0.000120734	0.000523181	0.00104636	0.000885383	0.000321958	0.000321958	0.000965873	0.000281713	0.000442692	0.000321958	0.000321958	0.000482936	0.000724404	0.000160979	0.000241468	0.000120734	0.000845138	4.02447e-05	0	0.00507083	0.00515132	0.00619768
OTU_87	k__Bacteria; p__Proteobacteria; c__Gammaproteobacteria; o__Xanthomonadales; f__Sinobacteraceae; g__; s__	0.000724404	0.000563426	0.000523181	0.000281713	0.000362202	0.000321958	0.000804894	0.000845138	0.000965873	0	0.000120734	4.02447e-05	0.000442692	0.000120734	0.000362202	0.000402447	0.000321958	0.00068416	0.000160979	0.000241468	0.000160979	0.000362202	0.000120734	4.02447e-05	0	0	8.04894e-05	0.000402447	0.000120734	0.000120734	0.000804894	0.000281713	0.000804894	0.00156954	0.00148905	0.00112685	0.00309884	0.00273664	0.00293786	0.00297811	0.0018915	0.00229395	0.00160979	0.00297811	0.00490985	0.00132807	0.00136832	0.00136832
OTU_78	k__Bacteria; p__Planctomycetes; c__Planctomycetia; o__Gemmatales; f__Gemmataceae; g__; s__	0.000804894	0.0015293	0.00100612	0.00269639	0.00245493	0.0011671	0.000804894	0.000845138	0.00201223	8.04894e-05	0	4.02447e-05	0.000885383	0.00217321	0.00104636	0.00205248	0.0018915	0.00362202	0.000442692	0.000643915	8.04894e-05	4.02447e-05	8.04894e-05	0	0.00165003	0.000764649	0.00112685	0.00293786	0.00173052	0.00297811	0.00354153	0.00112685	0.00213297	0.0022537	0.000643915	0.0022537	0.000885383	0.00060367	0.000885383	0.000160979	0	0	0.000201223	4.02447e-05	0.000120734	4.02447e-05	4.02447e-05	4.02447e-05
OTU_69	k__Bacteria; p__Bacteroidetes; c__[Saprospirae]; o__[Saprospirales]; f__Saprospiraceae; g__Aquirestis; s__calciphila	0.000482936	0.000643915	0.000925628	0.00277688	0.00221346	0.00253542	0.0011671	0.0015293	0.00209272	0.000321958	0.000160979	0.000402447	0.00140856	0.000965873	0.00181101	0.00128783	0.00165003	0.00181101	0.000281713	0.000724404	8.04894e-05	0.000724404	0.000724404	0.000845138	0.000281713	0.000321958	0.000120734	0.00193175	0.00233419	0.00197199	0.00209272	0.00169028	0.00165003	0.00132807	0.000885383	0.00140856	0.00156954	0.00104636	0.000925628	0.00060367	0.000724404	0.000402447	0.000563426	0.000442692	0.000523181	8.04894e-05	0.000120734	0.000120734
OTU_4200	k__Bacteria; p__Actinobacteria; c__Actinobacteria; o__Actinomycetales; f__ACK-M1; g__; s__	0.000362202	0.00108661	0.000764649	0.00156954	0.000804894	0.000764649	0.00100612	0.000804894	0.000402447	0.00060367	0.00100612	0.00068416	0.000563426	0.000281713	0.000804894	0.00104636	0.000885383	0.000764649	0.000482936	0.0011671	0.000925628	0.000201223	0.000160979	0.000402447	0.000160979	8.04894e-05	8.04894e-05	0.000804894	0.000402447	0.000563426	0.00124759	0.00120734	0.000804894	0.00100612	0.00185126	0.00209272	0.00060367	0.000241468	0.000402447	0.000643915	0.000442692	0.000643915	0.00068416	0.000845138	0.00104636	0.000362202	0.000281713	0.000201223
OTU_95	k__Bacteria; p__Bacteroidetes; c__Bacteroidia; o__Bacteroidales; f__S24-7; g__; s__	0.000804894	0.00112685	0.000563426	0.00108661	0.000885383	0.00104636	0.00108661	0.0011671	0.00132807	0.000845138	0.000965873	0.000965873	0.000764649	0.000885383	0.000925628	0.00104636	0.00128783	0.000804894	0.000362202	0.000885383	0.000362202	0.00144881	0.000965873	0.00108661	0.00128783	0.00068416	0.00068416	0.000804894	0.00104636	0.000563426	0.000724404	0.000845138	0.00108661	0.00068416	0.00112685	0.00100612	0.000764649	0.00060367	0.000563426	0.00104636	0.00104636	0.00108661	0.0011671	0.000965873	0.00100612	0.000925628	0.00060367	0.000845138
OTU_13847	k__Bacteria; p__Proteobacteria; c__Betaproteobacteria; o__Burkholderiales; f__Oxalobacteraceae; g__; s__	0.000241468	0.000201223	0.000281713	0.000563426	0.000362202	0.000643915	0.000643915	0.000362202	0.000362202	0.000120734	0.000241468	0.000120734	0.000362202	0.000160979	0.000321958	0.000442692	0.000885383	0.000482936	0.000201223	0.000241468	0.000201223	0.00068416	0.00104636	0.0015293	0.000281713	0.000482936	0.000523181	0.000482936	0.000362202	0.000281713	0.000845138	0.000402447	0.000885383	0.000845138	0.000643915	0.00060367	0.00197199	0.00140856	0.00128783	0.000925628	0.00173052	0.00128783	0.00165003	0.00241468	0.00269639	0.000563426	0.000523181	0.00068416
OTU_15026	k__Bacteria; p__Proteobacteria; c__Betaproteobacteria; o__Burkholderiales; f__Comamonadaceae; g__Leptothrix; s__	0.00132807	0.00120734	0.00108661	0.000402447	0.000402447	0.000241468	0.000402447	0.000201223	0.000321958	0.000160979	0.000281713	0.000241468	0.00060367	0.00104636	0.000362202	0.000201223	0.000241468	0.000442692	0.00108661	0.000321958	0.000804894	0.000563426	0.000482936	0.00068416	0.000442692	0.00100612	0.000201223	0.000643915	0.000804894	0.000563426	0.00068416	0.000724404	0.00104636	0.00197199	0.00744527	0.000442692	0.00160979	0.0018915	0.000885383	0.000845138	0.000563426	0.000523181	0.000362202	0.000160979	0	0.00599646	0.003783	0.00253542
OTU_89	k__Bacteria; p__Proteobacteria; c__Betaproteobacteria; o__MWH-UniP1; f__; g__; s__	0.000201223	0	0.000281713	0	0	4.02447e-05	0.000201223	0.000160979	0.000563426	0.0136832	0.0173455	0.0142064	8.04894e-05	8.04894e-05	4.02447e-05	0.000120734	0.000160979	4.02447e-05	0.000120734	0	4.02447e-05	8.04894e-05	8.04894e-05	0.000201223	0	4.02447e-05	0	0.000120734	4.02447e-05	8.04894e-05	0.000160979	0	0	0.000120734	4.02447e-05	4.02447e-05	8.04894e-05	0	0.000281713	4.02447e-05	4.02447e-05	4.02447e-05	8.04894e-05	0	4.02447e-05	0.000160979	8.04894e-05	8.04894e-05
OTU_5100	k__Bacteria; p__Proteobacteria; c__Gammaproteobacteria; o__Xanthomonadales; f__Xanthomonadaceae; g__; s__	0.000241468	0.000845138	0.000402447	0.00136832	0.00253542	0.00120734	0.000442692	0.000523181	0.00120734	4.02447e-05	4.02447e-05	0.000120734	0.000804894	0.000442692	0.00068416	0.000885383	0.00100612	0.00128783	8.04894e-05	0.000362202	8.04894e-05	0.000885383	0.00124759	0.00156954	0.00249517	0.0030586	0.00197199	0.00173052	0.00293786	0.00257566	0.00100612	0.000482936	0.00068416	0.000281713	0.00140856	0.000402447	0.000281713	0.000321958	0.000764649	8.04894e-05	0.000241468	4.02447e-05	0.000160979	0.000321958	0	0.000120734	0.000201223	4.02447e-05
OTU_6841	k__Bacteria; p__Bacteroidetes; c__Cytophagia; o__Cytophagales; f__Cyclobacteriaceae; g__; s__	0.000201223	0.000241468	0.000160979	0.000563426	0.00060367	0.000764649	0.00104636	0.00132807	0.000845138	0.00309884	0.00313909	0.00313909	0.00132807	0.000321958	0.00169028	0.00144881	0.00148905	0.00128783	4.02447e-05	0.000764649	0.000362202	0.000321958	0.000281713	0.000321958	4.02447e-05	4.02447e-05	0	0.0011671	0.000885383	0.000523181	0.00140856	0.00165003	0.00160979	0.00128783	0.000965873	0.000362202	0.000523181	0.000281713	0.000362202	0.00253542	0.00233419	0.00197199	0.000643915	0.000764649	0.000885383	0.000764649	0.000402447	0.000482936
OTU_15301	k__Bacteria; p__Proteobacteria; c__Betaproteobacteria; o__Burkholderiales; f__Comamonadaceae; g__Limnohabitans; s__	0.00160979	0.00104636	0.00140856	0.000321958	0.000402447	0.000442692	0.000160979	0.000120734	0.000120734	0.00185126	0.00273664	0.00185126	0.0011671	0.000321958	0.000845138	0.000120734	0.000241468	0.000523181	0.000523181	0.000965873	0.000764649	0.00197199	0.00193175	0.00233419	0.000845138	0.00060367	0.000643915	0.000563426	0.000804894	0.00100612	0.00068416	0.00060367	0.000724404	0.000442692	0.000281713	0.000241468	0.000281713	0.000201223	0.000402447	0.00165003	0.00108661	0.00136832	0.000241468	0.000120734	4.02447e-05	0.00265615	0.00201223	0.00217321
OTU_15783	k__Bacteria; p__Proteobacteria; c__Betaproteobacteria; o__Burkholderiales; f__Comamonadaceae; g__Polaromonas; s__	0.000643915	0.00060367	0.000362202	0.000563426	0.000241468	0.000482936	0.00060367	0.00060367	0.000201223	0.000241468	0.000160979	0.000120734	0.000442692	0.000201223	0.000563426	0.000321958	0.000402447	0.000402447	0.000160979	0.000241468	0.000201223	0.000241468	0.000563426	0.000241468	0.000160979	0.000120734	0.000362202	0.000402447	0.000523181	0.000160979	0.00060367	0.000804894	0.000402447	0.000764649	0.000724404	0.00068416	0.000965873	0.00104636	0.0015293	0.00434643	0.00486961	0.00386349	0.00160979	0.00209272	0.00293786	0.00277688	0.00217321	0.00144881
OTU_109	k__Bacteria; p__Bacteroidetes; c__Sphingobacteriia; o__Sphingobacteriales; f__; g__; s__	0.000764649	0.000201223	0.000643915	0.000442692	0.000201223	0.000321958	0.000563426	0.00132807	0.000402447	0	0	4.02447e-05	0.000321958	0.000120734	0.000523181	0.000523181	0.000563426	0.000201223	4.02447e-05	0.000241468	0	0	8.04894e-05	4.02447e-05	0	0	4.02447e-05	0.000281713	8.04894e-05	8.04894e-05	0.000362202	0.000281713	0.000120734	0.000201223	0.000120734	0.000241468	0.00772698	0.00623793	0.00599646	0.000764649	0.00273664	0.00181101	0.00434643	0.00293786	0.00350129	0.000885383	0.000845138	0.000925628
OTU_103	k__Bacteria; p__Proteobacteria; c__Alphaproteobacteria; o__Rhizobiales; f__Methylocystaceae; g__Methylosinus; s__	0.000965873	0.00100612	0.000643915	0.000120734	0.000523181	0.000201223	8.04894e-05	0.000241468	0.000482936	0	0	8.04894e-05	8.04894e-05	0.000442692	0.000160979	0.000442692	0.000482936	0.00060367	8.04894e-05	0.000281713	0.000160979	0.0011671	0.00060367	0.000402447	0.000120734	0.000201223	0.000120734	0.000201223	0.000120734	0.000201223	8.04894e-05	0.000160979	0.000160979	0.000563426	0.00060367	0.000804894	0.00796845	0.00482936	0.00563426	0.000965873	0.000643915	0.00060367	0.00410496	0.00221346	0.00277688	0.00148905	0.000845138	0.000724404
OTU_11740	k__Bacteria; p__Cyanobacteria; c__Chloroplast; o__Stramenopiles; f__; g__; s__	0.00181101	0.000925628	0.00124759	0.00313909	0.00301835	0.00249517	0.00217321	0.00237444	0.00181101	0	8.04894e-05	4.02447e-05	0.000925628	0.000241468	0.00120734	0.00213297	0.00197199	0.00293786	4.02447e-05	0.000764649	0	0.00156954	0.00209272	0.00165003	0.000160979	0.000120734	4.02447e-05	0.00173052	0.00100612	0.000402447	0.000965873	0.00100612	0.000523181	0.00132807	0.000724404	0.00124759	0.000362202	0.000321958	0.00068416	0.000362202	0.000321958	0.000201223	0.000402447	8.04894e-05	0.000120734	8.04894e-05	4.02447e-05	0.000160979
OTU_11215	k__Bacteria; p__Proteobacteria; c__Alphaproteobacteria; o__Sphingomonadales; f__; g__; s__	0.00132807	0.00108661	0.00100612	0.000764649	0.000845138	0.00068416	0.000321958	0.000362202	0.000482936	0.000362202	0.000241468	0.000241468	0.000885383	0.000724404	0.000885383	0.000442692	0.00068416	0.000724404	0.000201223	0.000160979	0.000120734	0.00575499	0.00563426	0.00523181	0.00253542	0.00249517	0.00535254	0.000643915	0.000402447	0.000764649	0.000845138	0.00124759	0.00100612	0.000442692	0.000482936	0.000281713	8.04894e-05	8.04894e-05	0.000281713	0	0	4.02447e-05	0	0	4.02447e-05	0.000160979	0.000160979	4.02447e-05
OTU_20371	k__Bacteria; p__Bacteroidetes; c__[Saprospirae]; o__[Saprospirales]; f__Chitinophagaceae; g__; s__	0.00173052	0.00120734	0.00160979	0.00156954	0.000925628	0.00144881	0.00124759	0.00120734	0.00120734	0.000402447	0.000281713	0.000563426	0.000965873	0.000281713	0.000965873	0.00136832	0.00209272	0.00128783	0	0.000201223	4.02447e-05	0.00140856	0.00201223	0.00112685	0	0.000482936	0.000402447	0.000845138	0.000321958	0.000482936	0.000845138	0.000965873	0.000563426	0.00132807	0.000965873	0.00209272	0.00108661	0.000965873	0.000965873	0.00197199	0.00177077	0.0015293	0.000563426	0.000321958	0.000281713	0.000442692	0.000442692	0.000442692
OTU_19980	k__Bacteria; p__Bacteroidetes; c__[Saprospirae]; o__[Saprospirales]; f__Chitinophagaceae; g__; s__	0.00120734	0.00104636	0.00140856	0.0018915	0.00173052	0.00197199	0.00201223	0.00173052	0.00173052	0.000442692	0.000201223	0.000241468	0.00245493	0.000643915	0.0015293	0.00213297	0.00181101	0.00241468	8.04894e-05	0.000281713	8.04894e-05	0.00136832	0.0022537	0.00169028	8.04894e-05	0.000362202	0.000563426	0.00156954	0.000643915	0.00120734	0.00140856	0.00124759	0.00140856	0.00132807	0.00068416	0.00112685	0.000362202	0.000201223	0.000241468	0.000241468	0.000362202	8.04894e-05	0.000201223	0.000241468	0.000120734	0.000160979	0.000281713	0
OTU_111	k__Bacteria; p__Bacteroidetes; c__[Saprospirae]; o__[Saprospirales]; f__Chitinophagaceae; g__; s__	0	0	0	0.0026159	0.00330006	0.00370251	0.00156954	0.00165003	0.00285737	0	0.000160979	4.02447e-05	0.000804894	0.000804894	0.00132807	0.00233419	0.00197199	0.00233419	4.02447e-05	8.04894e-05	4.02447e-05	8.04894e-05	0	8.04894e-05	0	0	0	0.00132807	0.00169028	0.00217321	0.00112685	0.00173052	0.000925628	0.00128783	0.000804894	0.00173052	0.000442692	0.000442692	0.000402447	0.000523181	0.000925628	0.000482936	0.00156954	0.000965873	0.00104636	0.000442692	0.000482936	0.000281713
OTU_14270	k__Bacteria; p__Proteobacteria; c__Alphaproteobacteria; o__Rhodobacterales; f__Rhodobacteraceae; g__Rhodobacter; s__	0.00140856	0.0011671	0.000885383	0.000201223	0.000160979	0.000120734	8.04894e-05	4.02447e-05	0.000281713	0.00197199	0.00104636	0.00265615	0.000442692	0.000281713	0.000241468	8.04894e-05	0.000120734	0.000563426	0.00366227	0.00688184	0.0026159	0.00233419	0.00181101	0.00108661	0.00136832	0.000402447	0.000523181	0.000362202	0.000241468	0.000201223	0.000281713	0.000160979	0.00857212	0.000120734	0.000160979	0.000321958	0.00100612	0.00124759	4.02447e-05	8.04894e-05	0.000120734	0	0.000362202	0	0	0.00060367	0.000201223	0.000160979
OTU_115	k__Bacteria; p__Verrucomicrobia; c__[Pedosphaerae]; o__[Pedosphaerales]; f__R4-41B; g__; s__	0.00140856	0.000442692	0.000885383	0.00100612	0.000563426	0.00217321	0.00128783	0.00132807	0.00193175	0.000241468	0.000241468	0.000281713	0.00068416	0.000402447	0.00108661	0.00104636	0.00173052	0.00132807	4.02447e-05	0.000321958	0.000362202	0.000482936	0.000724404	0.000362202	0.000160979	0	0.000160979	0.00124759	0.000643915	0.00068416	0.000804894	0.000442692	0.000321958	0.000643915	0.000120734	0.000523181	0.00197199	0.00205248	0.0022537	0.000362202	0.000724404	0.00060367	0.00334031	0.00249517	0.00354153	0.000321958	0.000321958	0.000442692
OTU_124	k__Bacteria; p__Actinobacteria; c__Thermoleophilia; o__Gaiellales; f__; g__; s__	0.00104636	0.00233419	0.00128783	0.000362202	0.000482936	0.000482936	0.000643915	0.000804894	0.0011671	0	4.02447e-05	0	0.000724404	0.00132807	0.000845138	0.000724404	0.00136832	0.00124759	0.000241468	0.000281713	8.04894e-05	0.000201223	8.04894e-05	0.000321958	0	4.02447e-05	0	0.00108661	0.00185126	0.00100612	0.000925628	0.00068416	0.000885383	0.000643915	0.000965873	0.00160979	0.00382325	0.00334031	0.0026159	0.000563426	0.000321958	0.000160979	0.00128783	0.00128783	0.00148905	0.000321958	0.000241468	0.000120734
OTU_107	k__Bacteria; p__Planctomycetes; c__Phycisphaerae; o__Phycisphaerales; f__; g__; s__	0.000120734	0.000160979	0.000281713	0.000362202	0.000201223	0.000482936	0.000442692	0.000523181	0.000724404	4.02447e-05	4.02447e-05	0	0.000160979	0.000120734	0.000402447	0.000120734	0.000362202	0.000321958	0.000120734	0.000160979	4.02447e-05	8.04894e-05	0.000120734	8.04894e-05	8.04894e-05	0	4.02447e-05	0.000281713	0.000321958	0.000120734	0.000643915	0.000281713	0.000321958	0.000402447	8.04894e-05	0.000523181	0.00201223	0.00229395	0.00181101	0.000845138	0.00160979	0.000804894	0.00800869	0.00599646	0.00998068	0.00128783	0.00144881	0.00100612
OTU_119	k__Bacteria; p__Bacteroidetes; c__Bacteroidia; o__Bacteroidales; f__S24-7; g__; s__	0.000965873	0.000885383	0.000764649	0.000965873	0.000845138	0.00104636	0.000804894	0.000925628	0.000965873	0.000724404	0.000845138	0.00108661	0.000523181	0.000925628	0.00060367	0.00132807	0.000885383	0.00124759	0.000201223	0.000482936	0.00060367	0.00112685	0.00060367	0.000925628	0.000643915	0.000523181	0.000523181	0.000885383	0.000643915	0.000764649	0.00112685	0.000845138	0.000925628	0.000643915	0.000885383	0.0011671	0.000482936	0.000885383	0.00060367	0.00120734	0.00108661	0.000563426	0.000724404	0.000804894	0.000925628	0.000804894	0.00068416	0.000845138
OTU_110	k__Bacteria; p__Cyanobacteria; c__Oscillatoriophycideae; o__Chroococcales; f__Xenococcaceae; g__Chroococcidiopsis; s__polansiana	0.000201223	8.04894e-05	0.000241468	0.000160979	0.000241468	8.04894e-05	0.000281713	0.000442692	0.000201223	0.000160979	0	0.000160979	0.000241468	8.04894e-05	0.000321958	0.000643915	0.000442692	0.00233419	0.000764649	0.0015293	0.000442692	0.00313909	0.00551352	0.00507083	0.00325982	0.00253542	0.00700258	0.000402447	0.00112685	0.000885383	0.000241468	0.000201223	0.000120734	0.000362202	0.000402447	0.000281713	0.000321958	8.04894e-05	0.000362202	0.000201223	0.000281713	0.000241468	0.00257566	8.04894e-05	0.000160979	0.000321958	0.000201223	0.000120734
OTU_12575	k__Bacteria; p__Actinobacteria; c__Actinobacteria; o__Actinomycetales; f__ACK-M1; g__; s__	0.000563426	0.000523181	0.000563426	0.000321958	0.000482936	0.000201223	0.000925628	0.000764649	0.000402447	0.00229395	0.00386349	0.00257566	0.00060367	0.000241468	0.000321958	0.000563426	0.000442692	0.000442692	8.04894e-05	4.02447e-05	0	0.00120734	0.0018915	0.00136832	0.0015293	0.00197199	0.00104636	0.000241468	0.000523181	0.000885383	0.000563426	0.000764649	0.000442692	0.000281713	0.000482936	0.000321958	0.000120734	4.02447e-05	4.02447e-05	8.04894e-05	0	8.04894e-05	0.000120734	4.02447e-05	0.000160979	0.000321958	0.000362202	0.000160979
OTU_16753	k__Bacteria; p__Proteobacteria; c__Betaproteobacteria; o__Burkholderiales; f__Comamonadaceae; g__Variovorax; s__	0.00112685	0.00148905	0.00144881	0.000402447	0.000442692	0.000482936	0.000523181	0.000442692	0.000402447	0.00136832	0.00100612	0.00124759	0.000643915	0.000442692	0.000885383	0.000241468	0.000482936	0.000442692	0.00124759	0.00209272	0.00108661	0.000321958	0.00068416	0.00108661	0.000362202	0.000482936	0.000402447	0.000643915	0.000362202	0.000523181	0.000724404	0.00060367	0.00060367	0.000482936	0.000281713	0.000241468	0.000321958	0.000402447	0.000563426	0.000885383	0.000804894	0.000563426	0.000523181	0.000321958	0.000643915	0.000925628	0.000804894	0.00132807
OTU_114	k__Bacteria; p__Proteobacteria; c__Betaproteobacteria; o__; f__; g__; s__	0.000321958	0.00060367	0.000402447	0.00112685	0.000523181	0.000965873	0.00060367	0.000563426	0.000724404	8.04894e-05	0.000241468	0.000241468	0.00104636	0.00104636	0.00112685	0.00120734	0.000764649	0.000563426	0.000281713	0.000201223	0.000120734	0.000281713	0.000201223	0.000241468	4.02447e-05	0.000160979	0.000120734	0.000764649	0.000402447	0.00100612	0.00104636	0.00128783	0.000845138	0.00060367	0.00104636	0.000885383	0.00209272	0.00173052	0.00144881	0.00100612	0.000563426	0.00128783	0.00104636	0.0018915	0.00193175	0.00112685	0.00068416	0.00060367
OTU_20532	k__Bacteria; p__Proteobacteria; c__Betaproteobacteria; o__Burkholderiales; f__Comamonadaceae; g__Limnohabitans; s__	0.00120734	0.00128783	0.00120734	0.00060367	0.00132807	0.00112685	0.000643915	0.000965873	0.00128783	0.000845138	0.00136832	0.000845138	0.00124759	0.00136832	0.00120734	0.000845138	0.00144881	0.000965873	0.00128783	0.000804894	0.00165003	0.000201223	0.000402447	0.000764649	0.000241468	0.00257566	0.000160979	0.000804894	0.000804894	0.000563426	0.00144881	0.00060367	0.00060367	0.00068416	0.000523181	0.000563426	0.000321958	0.000281713	0.000442692	0.000885383	0.000804894	0.000482936	0.000402447	0.000523181	0.000402447	0.000643915	0.00132807	0.00108661
OTU_6039	k__Bacteria; p__Proteobacteria; c__Betaproteobacteria; o__Burkholderiales; f__Comamonadaceae; g__Comamonas; s__	0.000724404	0.0011671	0.00068416	0.00108661	0.00104636	0.000885383	0.000201223	0.000201223	0.000120734	0.00108661	0.000523181	0.000804894	0.000885383	0.00297811	0.000885383	0.000321958	0.000362202	0.000201223	0.00454765	0.00241468	0.00619768	0.000321958	0.000321958	0.000362202	0.00128783	0.00108661	0.00068416	0.00060367	0.00124759	0.000643915	0.000362202	0.000482936	0.000442692	0.000724404	0.000442692	0.000321958	8.04894e-05	0.000442692	0.000362202	0.000804894	0.000563426	0.000442692	0.000402447	8.04894e-05	0	0.00128783	0.00108661	0.00100612
OTU_1030	k__Bacteria; p__Proteobacteria; c__Betaproteobacteria; o__Burkholderiales; f__Oxalobacteraceae; g__Polynucleobacter; s__	0.000482936	0.00060367	0.000281713	0.00108661	0.0011671	0.000764649	0.00068416	0.00124759	0.000925628	0.00430618	0.00507083	0.00398422	0.000885383	0.00068416	0.00108661	0.000925628	0.00060367	0.000764649	0.000160979	0.000241468	0.000120734	0.000523181	0.000523181	0.000523181	0.000241468	0.000402447	0.000362202	0.00100612	0.00124759	0.00068416	0.00104636	0.00112685	0.000804894	0.000885383	0.00100612	0.00112685	0.000120734	0.000120734	0.000281713	0.000281713	0.000523181	0.000804894	0.000160979	0.000362202	0.000442692	0.000160979	0.000241468	0.000402447
OTU_17892	k__Bacteria; p__Proteobacteria; c__Betaproteobacteria; o__Methylophilales; f__Methylophilaceae; g__; s__	0	8.04894e-05	8.04894e-05	8.04894e-05	8.04894e-05	4.02447e-05	4.02447e-05	0.000120734	0.000120734	0.00253542	0.00273664	0.00350129	0.000201223	0.000281713	4.02447e-05	8.04894e-05	8.04894e-05	4.02447e-05	0.000120734	0	4.02447e-05	0.000402447	0.00112685	0.00128783	0.000120734	8.04894e-05	0.000281713	0.000281713	8.04894e-05	0	0	0.000160979	8.04894e-05	0	0	4.02447e-05	0	4.02447e-05	0	8.04894e-05	4.02447e-05	8.04894e-05	8.04894e-05	0	4.02447e-05	0.000120734	0	0
OTU_128	k__Bacteria; p__Planctomycetes; c__Planctomycetia; o__Gemmatales; f__Gemmataceae; g__; s__	0.00100612	0.00156954	0.000885383	0.000482936	0.000241468	0.000241468	0.000201223	8.04894e-05	0.000523181	4.02447e-05	4.02447e-05	8.04894e-05	0.000241468	0.000563426	0.000281713	0.000402447	0.00060367	0.00132807	0.000120734	0.000241468	0	0.000442692	0.000201223	4.02447e-05	0	0	0	0.000563426	0.000804894	0.00068416	0.000724404	0.000362202	0.000241468	0.00104636	0.000442692	0.00201223	0.00490985	0.003783	0.00374276	0.00229395	0.00112685	0.000764649	0.00309884	0.00209272	0.00249517	0.000925628	0.000764649	0.00104636
OTU_137	k__Bacteria; p__Gemmatimonadetes; c__Gemmatimonadetes; o__KD8-87; f__; g__; s__	0.000523181	0.000201223	0.000482936	0.000160979	0.000281713	0.000281713	0.000402447	0.000523181	0.000643915	0	0	0	0.000321958	0.000201223	0.000321958	0.000281713	0.000523181	0.000563426	4.02447e-05	4.02447e-05	0	4.02447e-05	8.04894e-05	4.02447e-05	0	0	0.000120734	0.000563426	0.000362202	0.000321958	0.000764649	0.000281713	0.000120734	0.000523181	0.000764649	0.000321958	0.00269639	0.00309884	0.0026159	0.00257566	0.00181101	0.0018915	0.00181101	0.00394398	0.00422569	0.00100612	0.00144881	0.00060367
OTU_102	k__Bacteria; p__Proteobacteria; c__Betaproteobacteria; o__Rhodocyclales; f__Rhodocyclaceae; g__C39; s__	8.04894e-05	0	8.04894e-05	0.000120734	0.000160979	8.04894e-05	0.000120734	4.02447e-05	0.000160979	0.000120734	8.04894e-05	0	0.000724404	0.000482936	0.000764649	4.02447e-05	0.000241468	8.04894e-05	4.02447e-05	4.02447e-05	8.04894e-05	0.00519156	0.0049501	0.00655988	4.02447e-05	8.04894e-05	0	8.04894e-05	0.000201223	4.02447e-05	0.000160979	0.000321958	0.000160979	0.000241468	8.04894e-05	0	4.02447e-05	0.000120734	4.02447e-05	8.04894e-05	0.000160979	8.04894e-05	4.02447e-05	4.02447e-05	0	0.00144881	0.000885383	0.000965873
OTU_14799	k__Bacteria; p__[Thermi]; c__Deinococci; o__Deinococcales; f__Deinococcaceae; g__Deinococcus; s__	0.000362202	0.000120734	0.000281713	8.04894e-05	0.000241468	0.000160979	0.000201223	0.000160979	0.000120734	0.000281713	8.04894e-05	8.04894e-05	0.000523181	0.0018915	0.000241468	0.000120734	8.04894e-05	0.000482936	0.00639891	0.0030586	0.00148905	0.000281713	0.000281713	0.000120734	0.000402447	0.000201223	0.000563426	0.0011671	0.00241468	0.00140856	0.000120734	4.02447e-05	0.000281713	0.000965873	0.00217321	0.000442692	0.00410496	0.00563426	0.00301835	0.000281713	0.000201223	4.02447e-05	0.000845138	8.04894e-05	4.02447e-05	0.000241468	0.000482936	0.000241468
OTU_13944	k__Bacteria; p__Proteobacteria; c__Betaproteobacteria; o__Methylophilales; f__Methylophilaceae; g__; s__	8.04894e-05	0.000120734	0.000160979	0.000160979	0.000201223	0.000241468	0.000160979	0.000241468	0.000442692	8.04894e-05	8.04894e-05	0.000120734	0.000201223	0.000201223	0.000120734	0.000120734	4.02447e-05	0.000281713	4.02447e-05	0	0	0.000523181	0.000482936	0.00128783	0.000201223	0.000160979	8.04894e-05	0.000201223	0.000120734	0.000201223	0.000402447	8.04894e-05	0.000241468	0.000362202	0.000120734	0	0.000201223	0	0.000321958	8.04894e-05	8.04894e-05	4.02447e-05	8.04894e-05	0.000120734	4.02447e-05	0.000241468	4.02447e-05	0.000241468
OTU_121	k__Bacteria; p__Proteobacteria; c__Alphaproteobacteria; o__Rhodospirillales; f__Rhodospirillaceae; g__; s__	0.00100612	0.000482936	0.000804894	0.000442692	8.04894e-05	0.000321958	0.000724404	0.000804894	0.000442692	0	0	0	0.000281713	0.000201223	0.000442692	0.000120734	0.000724404	0.000402447	4.02447e-05	8.04894e-05	0	0.000201223	8.04894e-05	8.04894e-05	0	0	0	0.000281713	0.000362202	8.04894e-05	0.00060367	0.000160979	0.000402447	0.00068416	0.000241468	0.00060367	0.00651964	0.00579524	0.00490985	0.000965873	0.00136832	0.000563426	0.00317933	0.00245493	0.003783	0.00068416	0.000201223	0.000523181
OTU_1550	k__Bacteria; p__Proteobacteria; c__Alphaproteobacteria; o__Sphingomonadales; f__; g__; s__	0.00177077	0.00201223	0.00181101	0.00068416	0.00165003	0.000885383	0.000402447	0.000442692	0.000804894	0.00100612	0.000523181	0.000965873	0.000362202	0.000563426	0.000281713	0.000321958	0.00068416	0.000885383	0.00177077	0.00181101	0.00128783	0.000523181	0.000643915	0.000523181	0.00507083	0.00241468	0.00285737	0.000724404	0.000885383	0.00108661	0.000442692	0.000643915	0.000643915	0.000321958	0.000643915	0.000281713	0.000442692	0.000402447	0.000201223	0.00060367	0.00060367	0.000362202	0.000201223	0.000120734	0.000201223	8.04894e-05	0.000201223	0.000120734
OTU_108	k__Bacteria; p__Actinobacteria; c__Acidimicrobiia; o__Acidimicrobiales; f__C111; g__; s__	0.000241468	0.00068416	0.00104636	0.00148905	0.0015293	0.00173052	0.000764649	0.00104636	0.00205248	4.02447e-05	4.02447e-05	0.000201223	0.000442692	0.00156954	0.0011671	0.00173052	0.00173052	0.00144881	0.000362202	0.000643915	0.000241468	0.000281713	0.00068416	0.000362202	4.02447e-05	4.02447e-05	0	0.00148905	0.0018915	0.00205248	0.00173052	0.00120734	0.00173052	0.00169028	0.00100612	0.00205248	0.000321958	0.000482936	0.000281713	4.02447e-05	8.04894e-05	0.000201223	0.000281713	0.000362202	0.000321958	0.000120734	0.000160979	4.02447e-05
OTU_105	k__Bacteria; p__Proteobacteria; c__Alphaproteobacteria; o__Sphingomonadales; f__Erythrobacteraceae; g__; s__	0.000321958	0.00060367	0.000402447	0.000482936	0.000643915	0.000563426	0.000281713	0.000362202	0.00060367	0.000241468	0.000160979	0.000120734	0.000241468	0.0011671	0.000201223	0.000482936	0.000402447	0.000563426	0.00281713	0.00281713	0.00237444	0.000362202	0.000402447	0.000160979	0.0026159	0.00482936	0.00193175	0.000643915	0.000764649	0.000563426	0.000321958	0.000442692	0.000321958	0.000523181	0.00221346	0.000241468	0.000764649	0.00120734	0.000482936	0.000442692	0.000965873	0.000402447	0.00100612	0.000160979	0.000241468	0.000402447	0.000321958	0.00169028
OTU_5446	k__Bacteria; p__Cyanobacteria; c__Chloroplast; o__Stramenopiles; f__; g__; s__	0.00173052	0.000885383	0.00136832	0.00334031	0.00241468	0.00221346	0.00197199	0.00213297	0.00181101	0.000120734	8.04894e-05	0.000241468	0.000402447	0.000321958	0.000643915	0.00160979	0.00265615	0.00201223	8.04894e-05	0.000321958	4.02447e-05	0.000925628	0.0015293	0.000965873	0.000201223	8.04894e-05	4.02447e-05	0.00108661	0.00104636	0.000321958	0.000885383	0.000764649	0.00120734	0.00100612	0.000804894	0.000925628	0.000281713	0.000362202	0.000724404	0.000321958	0.000442692	0.000402447	0.000362202	4.02447e-05	0.000120734	8.04894e-05	8.04894e-05	4.02447e-05
OTU_10849	k__Bacteria; p__Actinobacteria; c__Actinobacteria; o__Actinomycetales; f__ACK-M1; g__; s__	0.000482936	0.00104636	0.000764649	0.00068416	0.000523181	0.00060367	0.00136832	0.00156954	0.000764649	0.000120734	8.04894e-05	0.000120734	0.000845138	0.000281713	0.000442692	0.00108661	0.000523181	0.000523181	4.02447e-05	0.000201223	0.000160979	0.000241468	0.000402447	0.000241468	8.04894e-05	8.04894e-05	8.04894e-05	0.000764649	0.000402447	0.000281713	0.00100612	0.00128783	0.000804894	0.00148905	0.00165003	0.00136832	0.00104636	0.00104636	0.00068416	0.0011671	0.000845138	0.00156954	0.000925628	0.00193175	0.00185126	0.00060367	0.000442692	0.000563426
OTU_120	k__Bacteria; p__Proteobacteria; c__Gammaproteobacteria; o__Aeromonadales; f__Aeromonadaceae; g__Aeromonas; s__caviae	0.00253542	0.00100612	0.000764649	0.00156954	0.00217321	0.00169028	0.000845138	0.000804894	0.00120734	0.000965873	0.000643915	0.000764649	0.000845138	0.00144881	0.00140856	0.000643915	0.00068416	0.00132807	0.00148905	0.000804894	0.000724404	0.000563426	0.000442692	0.00068416	0.000442692	0.000563426	0.000402447	0.00100612	0.000523181	0.000764649	0.000523181	0.000482936	0.000321958	0.000321958	0.000362202	0.000321958	0.00148905	0.00104636	0.000321958	0.000362202	0.000160979	0.000120734	0.000402447	0.000201223	0.000281713	0.000764649	0.000482936	0.000321958
OTU_11361	k__Bacteria; p__Proteobacteria; c__Gammaproteobacteria; o__Enterobacteriales; f__Enterobacteriaceae; g__Escherichia; s__coli	0.000362202	0.000885383	0.000724404	0.000523181	0.000643915	0.000482936	0.000442692	0.000442692	0.000845138	0.000442692	0.000482936	0.000442692	0.000321958	0.000764649	0.000402447	0.000362202	0.000482936	0.000442692	0.00060367	0.000402447	0.000804894	0.00068416	0.000442692	0.000482936	0.00197199	0.000482936	0.00060367	0.000402447	0.000523181	0.00068416	0.000563426	0.000281713	0.00068416	0.000362202	0.000321958	0.000442692	0.000482936	0.000885383	0.000563426	0.000241468	0.000885383	0.000482936	0.00060367	0.000402447	0.000885383	0.000402447	0.000442692	0.000925628
OTU_20132	k__Bacteria; p__Bacteroidetes; c__Sphingobacteriia; o__Sphingobacteriales; f__; g__; s__	0.000321958	0.000321958	0.000160979	0.0015293	0.00156954	0.0018915	0.00245493	0.0018915	0.00193175	0	8.04894e-05	0	0.00132807	0.000523181	0.00148905	0.00181101	0.00201223	0.00217321	0	0.000160979	0	8.04894e-05	0	4.02447e-05	0	0	8.04894e-05	0.00249517	0.00100612	0.00068416	0.00221346	0.00213297	0.000764649	0.00173052	0.000925628	0.00124759	0.000160979	8.04894e-05	0.000362202	0.000160979	4.02447e-05	0	0.00221346	0.00100612	0.00124759	0.000281713	0.000201223	0.000281713
OTU_125	k__Bacteria; p__Actinobacteria; c__Acidimicrobiia; o__Acidimicrobiales; f__EB1017; g__; s__	0.00197199	0.00221346	0.00229395	0.00108661	0.00265615	0.00265615	0.000925628	0.000925628	0.00398422	0	0	0	0.000563426	0.00108661	0.00140856	0.000885383	0.00136832	0.00136832	8.04894e-05	8.04894e-05	0	0	0	0	0.000120734	4.02447e-05	4.02447e-05	0.00128783	0.00148905	0.00156954	0.000402447	0.000201223	0.000321958	0.000321958	0.00060367	0.000362202	0.00281713	0.0030586	0.00201223	0	0.000120734	0	0.000241468	0.000321958	0.000160979	4.02447e-05	0	0.000120734
OTU_3242	k__Bacteria; p__Proteobacteria; c__Betaproteobacteria; o__Methylophilales; f__Methylophilaceae; g__; s__	0.000402447	0.000362202	0.000643915	0.000724404	0.000925628	0.000965873	0.00177077	0.00112685	0.000965873	0.000201223	0.000724404	0.000160979	0.00104636	0.000482936	0.00108661	0.000925628	0.00060367	0.000563426	8.04894e-05	0.000241468	0.000120734	0.000160979	0.000362202	0.000281713	0	0	0	0.000925628	0.000523181	0.000563426	0.000804894	0.00104636	0.00104636	0.00112685	0.00128783	0.00144881	0.000402447	0.000563426	0.000482936	0.000764649	0.000643915	0.0015293	0.00060367	0.0026159	0.0015293	0.000523181	0.000402447	0.000563426
OTU_127	k__Bacteria; p__Proteobacteria; c__Gammaproteobacteria; o__Xanthomonadales; f__Sinobacteraceae; g__; s__	0.000482936	0.00060367	0.000442692	0.000885383	0.000724404	0.00132807	0.00177077	0.00140856	0.00112685	0.000160979	0	0	0.00124759	0.000201223	0.000523181	0.000965873	0.00128783	0.000804894	0.000160979	0.000362202	0	4.02447e-05	0	0.000241468	4.02447e-05	0.000160979	8.04894e-05	0.00060367	0.000845138	0.00104636	0.00128783	0.00128783	0.00108661	0.00120734	0.00124759	0.00112685	0.00156954	0.000925628	0.0015293	0.0015293	0.00132807	0.000845138	0.000965873	0.00148905	0.00156954	0.00060367	0.000643915	0.000885383
OTU_16866	k__Bacteria; p__Proteobacteria; c__Betaproteobacteria; o__Burkholderiales; f__Comamonadaceae	0.00148905	0.00193175	0.00148905	0.000845138	0.000362202	0.000965873	0.000523181	0.000402447	0.000442692	0.000523181	0.00060367	0.00060367	0.00060367	0.00108661	0.000482936	0.000201223	0.000241468	0.00068416	0.000643915	0.000643915	0.00128783	0.00100612	0.000724404	0.00140856	0.000241468	0.000523181	0.000362202	0.000362202	0.000402447	0.000321958	0.000523181	0.000402447	0.000523181	0.000160979	0.000321958	0.000160979	0.000442692	8.04894e-05	0.000241468	0.00068416	0.000563426	0.000402447	0.000201223	0.000241468	0.000120734	0.00124759	0.0015293	0.00132807
OTU_104	k__Bacteria; p__Proteobacteria; c__Betaproteobacteria; o__Burkholderiales; f__; g__; s__	0.000402447	0.000402447	0.000281713	0.000241468	8.04894e-05	0.000241468	0.000201223	0.000120734	0.000120734	0.00575499	0.00490985	0.00639891	0.000201223	0.000120734	8.04894e-05	0.000281713	0.000120734	0.000563426	0.000442692	0.000925628	0.000845138	0.000201223	0.000120734	0.000241468	8.04894e-05	4.02447e-05	4.02447e-05	4.02447e-05	0.000160979	0.000160979	0.000160979	0.000442692	0.000281713	0.00185126	0.00104636	0.0015293	0.000965873	0.00060367	0.00104636	0.00068416	0.00124759	0.000885383	0.000523181	0.000442692	0.000321958	0.000241468	0.000281713	0.000201223
OTU_10699	k__Bacteria; p__Bacteroidetes; c__Cytophagia; o__Cytophagales; f__Cyclobacteriaceae; g__; s__	0.000643915	0.000925628	0.00060367	0.000442692	0.000120734	0.000362202	8.04894e-05	0.00060367	0.000482936	0.000523181	0.000362202	0.000241468	0.000482936	0.000160979	0.000281713	0.000321958	0.000321958	0.000241468	4.02447e-05	0	8.04894e-05	0	8.04894e-05	0.000120734	0.000241468	0.000120734	0.000120734	0.000281713	0.000281713	0.000321958	0.000442692	0.000321958	0.00104636	0.000563426	0.000724404	0.000281713	0.000724404	0.00144881	0.000724404	0.00354153	0.00575499	0.00390373	0.00169028	0.00185126	0.00148905	0.00104636	0.00140856	0.0015293
OTU_20662	k__Bacteria; p__Proteobacteria; c__Betaproteobacteria; o__Burkholderiales; f__Comamonadaceae; g__Rhodoferax; s__	0.00120734	0.000925628	0.00112685	0.000804894	0.000643915	0.000321958	0.000281713	0.000563426	0.00060367	0.00068416	0.000925628	0.000764649	0.00100612	0.000885383	0.000965873	0.000362202	0.000523181	0.000402447	0.00060367	0.000402447	0.000724404	0.00128783	0.00108661	0.00124759	0.000482936	0.000402447	0.000442692	0.000241468	0.000482936	0.000563426	0.00068416	0.00060367	0.000321958	0.000201223	0.000201223	0.000281713	0.000362202	0.000482936	0.000362202	0.000804894	0.00104636	0.00140856	0.000402447	0.000362202	4.02447e-05	0.00273664	0.00217321	0.0018915
OTU_14280	k__Bacteria; p__Proteobacteria; c__Betaproteobacteria; o__Burkholderiales; f__Comamonadaceae; g__Limnohabitans; s__	0.00269639	0.00173052	0.00156954	0.000201223	0.000241468	0.000523181	0.000523181	0.000563426	0.000241468	4.02447e-05	0.000402447	0.000160979	0.00104636	0.000402447	0.00068416	0	0.000201223	0.000321958	0.000321958	0.000362202	0.000362202	0.000885383	0.00112685	0.00144881	0.000160979	0.000281713	4.02447e-05	0.000402447	0.00068416	0.000201223	0.000321958	0.00060367	0.000362202	8.04894e-05	0.000321958	0.000241468	0	8.04894e-05	0.000120734	0.000241468	0.000120734	0.000241468	0.000120734	4.02447e-05	8.04894e-05	0.00173052	0.00100612	0.000925628
OTU_20577	k__Bacteria; p__Proteobacteria; c__Betaproteobacteria; o__Burkholderiales; f__Comamonadaceae	0.000442692	0.0011671	0.000764649	0.000643915	0.000402447	0.000442692	0.000482936	0.000362202	0.000281713	0.00108661	0.000804894	0.00100612	0.000845138	0.00060367	0.000845138	0.00068416	0.000442692	0.000362202	0.000925628	0.00100612	0.00108661	0.000764649	0.000885383	0.00104636	0.000281713	0.000523181	0.000845138	0.00060367	0.000523181	0.00068416	0.000362202	0.000402447	0.000563426	0.000523181	0.00100612	0.000321958	0.000482936	0.000482936	0.000764649	0.0011671	0.000965873	0.00068416	0.000281713	0.000321958	0.000321958	0.00173052	0.0015293	0.0015293
OTU_5525	k__Bacteria; p__Verrucomicrobia; c__Opitutae; o__[Cerasicoccales]; f__[Cerasicoccaceae]; g__; s__	0.000442692	0.00060367	0.000442692	0.000362202	0.000120734	0.000160979	0.000241468	0.000241468	0.000241468	0	0	4.02447e-05	8.04894e-05	0	0.000241468	0.000241468	0.000201223	8.04894e-05	8.04894e-05	8.04894e-05	4.02447e-05	0.0018915	0.00124759	0.0011671	4.02447e-05	0	0	4.02447e-05	8.04894e-05	4.02447e-05	0.000201223	0.000160979	0	0.000523181	0.00068416	0.000442692	0	8.04894e-05	0	0.000120734	0.000160979	8.04894e-05	8.04894e-05	0.000120734	0.000201223	0	4.02447e-05	0
OTU_132	k__Bacteria; p__Bacteroidetes; c__Flavobacteriia; o__Flavobacteriales; f__; g__; s__	0.000764649	0.000563426	0.000321958	0.00128783	0.00156954	0.00213297	0.00185126	0.00213297	0.00289762	4.02447e-05	0.000120734	4.02447e-05	0.00233419	0.00108661	0.00257566	0.00237444	0.00325982	0.00325982	8.04894e-05	0.000281713	0.000120734	0	4.02447e-05	4.02447e-05	0	0.000120734	8.04894e-05	0.00181101	0.00104636	0.000764649	0.00160979	0.00068416	0.000523181	0.00104636	0.000402447	0.00108661	8.04894e-05	8.04894e-05	0.000120734	4.02447e-05	0	4.02447e-05	0	4.02447e-05	8.04894e-05	0	0	4.02447e-05
OTU_150	k__Bacteria; p__Cyanobacteria; c__Chloroplast; o__Stramenopiles; f__; g__; s__	0.00173052	0.00060367	0.00124759	0.00438667	0.00599646	0.00575499	0.00185126	0.00140856	0.00169028	8.04894e-05	4.02447e-05	0	0.0011671	0.000643915	0.00156954	0.000885383	0.00112685	0.00112685	0	4.02447e-05	4.02447e-05	0.000281713	0.000241468	0.000120734	0	0	0	0.00104636	0.000241468	0.000321958	0.000362202	0.000362202	0.000362202	0.000724404	0.000362202	0.00060367	0.000321958	0.000160979	0.000281713	0	4.02447e-05	0.000120734	0.000321958	0.000281713	8.04894e-05	0.000160979	0.000160979	0.000241468
OTU_53	k__Bacteria; p__Proteobacteria; c__Betaproteobacteria; o__Methylophilales; f__Methylophilaceae; g__Methylotenera; s__mobilis	0.000442692	0.000160979	4.02447e-05	8.04894e-05	8.04894e-05	4.02447e-05	0.000120734	0.000281713	0.000402447	0.000201223	0.000160979	0.000201223	0.000120734	0.000120734	0.000201223	0.000362202	0.000321958	0.000120734	0.000160979	4.02447e-05	8.04894e-05	0.000402447	0.000321958	0.000724404	0	0.000160979	0.000201223	0.000201223	4.02447e-05	0.000120734	0.000241468	0.000160979	0.000201223	4.02447e-05	0.000160979	0.000120734	0.000241468	0.000120734	0.000201223	8.04894e-05	0.000120734	8.04894e-05	0	8.04894e-05	0	0.000160979	8.04894e-05	0.000160979
OTU_12267	k__Bacteria; p__Proteobacteria; c__Alphaproteobacteria; o__Sphingomonadales; f__Sphingomonadaceae; g__Novosphingobium; s__	0.00104636	0.000925628	0.000563426	0.000563426	0.000804894	0.000482936	0.000482936	0.000201223	0.000442692	8.04894e-05	0.000362202	0.000201223	0.000241468	0.000523181	0.000643915	0.000241468	0.00068416	0.000523181	0.000281713	0.000442692	0.000160979	0.00112685	0.00128783	0.00104636	0.00241468	0.00257566	0.00265615	0.000845138	0.00100612	0.00120734	0.00068416	0.00060367	0.000764649	0.000442692	0.00068416	0.000402447	0.000482936	0.000885383	0.000925628	0.000362202	0.000241468	8.04894e-05	0.000724404	0.000160979	0.000563426	0.000442692	0.000402447	0.000523181
OTU_14336	k__Bacteria; p__Proteobacteria; c__Betaproteobacteria; o__Burkholderiales; f__Oxalobacteraceae; g__Janthinobacterium; s__	0.000563426	0.000321958	0.000442692	0.00060367	0.000804894	0.000281713	0.000201223	0.000241468	0.000523181	0.000281713	0.000563426	0.000563426	0.000523181	0.00060367	0.000563426	0.000402447	0.000442692	0.000321958	0.0018915	0.0011671	0.000925628	0.000241468	0.000643915	0.000482936	0.00120734	0.00253542	0.0015293	0.00169028	0.00221346	0.00140856	0.000321958	0.000321958	0.000281713	0.00068416	0.000482936	0.000281713	0.0022537	0.00156954	0.00160979	0.000362202	0.000362202	0.000281713	0.000160979	0.000442692	0.000160979	0.000523181	0.000362202	0.000563426
OTU_19664	k__Bacteria; p__Bacteroidetes; c__Flavobacteriia; o__Flavobacteriales; f__Cryomorphaceae; g__; s__	0	4.02447e-05	0	0.000804894	0.00104636	0.0015293	0.00136832	0.00128783	0.00136832	0	0	4.02447e-05	0.00177077	0.000321958	0.00100612	0.00205248	0.00209272	0.00273664	4.02447e-05	0.000120734	0	4.02447e-05	0	0.000120734	4.02447e-05	0	4.02447e-05	0.00120734	0.00104636	0.000724404	0.00281713	0.00156954	0.0018915	0.00128783	0.0011671	0.00128783	0.000764649	0.000362202	0.00060367	0.000563426	0.000925628	0.000281713	0.000482936	0.000643915	0.000523181	0.000362202	0.000241468	0.000160979
OTU_14005	k__Bacteria; p__Proteobacteria; c__Alphaproteobacteria; o__Rhodobacterales; f__Rhodobacteraceae; g__Rhodobacter; s__	0.00205248	0.00193175	0.0015293	0.000523181	0.000442692	0.000482936	0.000321958	8.04894e-05	0.000482936	0.00334031	0.00136832	0.00309884	0.000442692	0.00108661	0.000442692	8.04894e-05	0.000160979	0.000724404	0.00136832	0.0015293	0.00060367	0.00140856	0.0015293	0.000724404	0.00277688	0.00173052	0.00201223	0.000241468	0.00108661	0.000804894	0.000402447	4.02447e-05	0.000120734	8.04894e-05	0.000442692	0.000120734	0.000120734	0.000201223	0.000160979	0.000160979	0.000120734	4.02447e-05	0.000201223	0	0	0.000201223	4.02447e-05	0.000241468
OTU_1256	k__Bacteria; p__Cyanobacteria; c__Synechococcophycideae; o__Synechococcales; f__Synechococcaceae; g__Synechococcus; s__	0.00237444	0.00253542	0.00321958	0.000402447	0.000321958	0.000281713	0.000321958	0.000442692	0.00160979	0.00068416	0.000563426	0.000885383	0.000160979	0.000804894	0.000321958	0.000321958	0.000804894	0.00104636	8.04894e-05	0	0	0.000160979	0.000160979	0.000160979	0.000120734	4.02447e-05	0	0.000523181	0.00060367	0.000442692	0.000321958	0.000241468	0.000160979	0.000482936	0.000120734	0.000885383	0.00301835	0.00293786	0.00285737	0.00132807	0.0011671	0.00100612	0.00112685	0.000362202	0.000724404	0.000160979	0.000201223	8.04894e-05
OTU_138	k__Bacteria; p__Bacteroidetes; c__Sphingobacteriia; o__Sphingobacteriales; f__; g__; s__	0.00112685	0.000724404	0.000643915	0.000764649	0.00068416	0.000804894	0.000764649	0.00128783	0.0011671	0	0	0	0.00112685	0.000482936	0.00100612	0.00128783	0.00128783	0.0011671	4.02447e-05	0.000160979	8.04894e-05	4.02447e-05	4.02447e-05	0	0	0	0	0.000764649	0.000442692	0.000482936	0.00169028	0.00108661	0.000764649	0.00060367	0.000321958	0.00068416	0.00177077	0.00132807	0.00156954	0.00108661	0.00201223	0.00140856	0.00104636	0.00128783	0.00120734	0.000482936	0.000321958	0.000482936
OTU_1	k__Bacteria; p__Proteobacteria; c__Betaproteobacteria; o__Burkholderiales; f__Comamonadaceae	0.00100612	0.00108661	0.00104636	0.000402447	0.000321958	0.000442692	0	0.000160979	0.000402447	0.00124759	0.00132807	0.00108661	0.000965873	0.000442692	0.000402447	0.000160979	0.000321958	0.000201223	0.000402447	0.00100612	0.000764649	0.00156954	0.00120734	0.00136832	0.00060367	0.00100612	0.000321958	0.000281713	0.000442692	0.000442692	0.000643915	0.00100612	0.000362202	0.000281713	0.000160979	0.000120734	0.000362202	0.000281713	0.000724404	0.000925628	0.000724404	0.000885383	8.04894e-05	0	0	0.00112685	0.0018915	0.00120734
OTU_13744	k__Bacteria; p__Proteobacteria; c__Betaproteobacteria; o__Burkholderiales; f__Comamonadaceae; g__; s__	0.000321958	0.00104636	0.000804894	0.000402447	0.000482936	0.000160979	8.04894e-05	0.000241468	0.000160979	0.000120734	0.000160979	0.000241468	0.000362202	0.00104636	0.000281713	0.000201223	0.000120734	0.000523181	0.0015293	0.0011671	0.00253542	0.000563426	0.000362202	0.000362202	0.000201223	0.00100612	0.000201223	0.00100612	0.00156954	0.000845138	0.000764649	0.00068416	4.02447e-05	0.00257566	0.00547328	0.00132807	0.000362202	0.000643915	0.000925628	0.000523181	0.000402447	0.000201223	0.000482936	0.000120734	0	0.00140856	0.000321958	0.000442692
OTU_86	k__Bacteria; p__Cyanobacteria; c__Oscillatoriophycideae; o__Oscillatoriales; f__Phormidiaceae; g__Phormidium; s__	0.00104636	0.00068416	0.000724404	0.00120734	0.00325982	0.00136832	0.000764649	0.000523181	0.00144881	0.000482936	0.000482936	0.000402447	0.000482936	0.000402447	0.000523181	0.000804894	0.000764649	0.0011671	0.000281713	0.000563426	0.000241468	0.00068416	0.000804894	0.000845138	0.000442692	0.000523181	0.000442692	0.000482936	0.000563426	0.00068416	0.000362202	0.000402447	0.00068416	0.000482936	0.000321958	0.000442692	0.000764649	0.000402447	0.000845138	0.000643915	0.000845138	0.000885383	0.000643915	0.000643915	0.000523181	0.000321958	0.000482936	0.000442692
OTU_93	k__Bacteria; p__Planctomycetes; c__Planctomycetia; o__Pirellulales; f__Pirellulaceae; g__; s__	0.00382325	0.00442692	0.00442692	0.00060367	0.000764649	0.00100612	0.000523181	0.000885383	0.0011671	0.00217321	0.00257566	0.00297811	0.000201223	0.000845138	0.000362202	0.00068416	0.00108661	0.000724404	0.000362202	0.000965873	0.000321958	4.02447e-05	0.000160979	4.02447e-05	0.000241468	0.000362202	0.000362202	0.000482936	0.000160979	0.000362202	0.000442692	8.04894e-05	0.000120734	0.00060367	0.000160979	0.000321958	4.02447e-05	0.000201223	4.02447e-05	8.04894e-05	8.04894e-05	4.02447e-05	0.000241468	0	8.04894e-05	8.04894e-05	4.02447e-05	4.02447e-05
OTU_2015	k__Bacteria; p__Proteobacteria; c__Alphaproteobacteria; o__Caulobacterales; f__Caulobacteraceae; g__Mycoplana; s__	0.000402447	0.000643915	0.000804894	0.000442692	0.0011671	0.00060367	0.000482936	0.000482936	0.000120734	0.000724404	0.000402447	0.000764649	0.000643915	0.000724404	0.000321958	0.000402447	0.000764649	0.000563426	0.000724404	0.000724404	0.00108661	0.000965873	0.000563426	0.00060367	0.00197199	0.00104636	0.00120734	0.000965873	0.000804894	0.000482936	0.000563426	0.000563426	0.000523181	0.000643915	0.000563426	0.000281713	0.00136832	0.000563426	0.000885383	0.000321958	0.00068416	0.000402447	0.000885383	0.000321958	0.000402447	0.000643915	0.000362202	0.00108661
OTU_6772	k__Bacteria; p__Proteobacteria; c__Alphaproteobacteria; o__Sphingomonadales; f__Sphingomonadaceae; g__Novosphingobium; s__	0.000281713	0.000563426	0.000482936	0.000362202	0.0011671	0.000402447	0.000442692	0.000321958	0.00104636	0.000120734	0.000201223	0.000160979	0.000724404	0.00104636	0.000724404	0.000482936	0.00060367	0.000845138	0.000724404	0.000402447	0.000241468	0.00104636	0.00128783	0.00108661	0.00245493	0.00136832	0.00104636	0.000965873	0.00128783	0.0015293	0.000804894	0.000482936	0.000804894	0.000845138	0.000482936	0.000482936	0.000402447	0.0011671	0.00100612	0.000201223	0.000362202	0.000120734	0.000402447	0.000160979	0.000160979	0.000281713	0.000402447	0.000321958
OTU_1351	k__Bacteria; p__Bacteroidetes; c__Sphingobacteriia; o__Sphingobacteriales; f__; g__; s__	0.00060367	0.000160979	0.00068416	0.000724404	0.000402447	0.000523181	0.000523181	0.00060367	0.00124759	0.000965873	0.0011671	0.00156954	0.000442692	0.000563426	0.000643915	0.000845138	0.000885383	0.00128783	0.000120734	0.000643915	0.000281713	0.000281713	0.000160979	0.000241468	4.02447e-05	4.02447e-05	0.000120734	0.000241468	0.000241468	0.000160979	0.00120734	0.000643915	0.00060367	0.000563426	0.00060367	0.000764649	0.000321958	0.000362202	0.000442692	0.00068416	0.000643915	0.000563426	0.00177077	0.00140856	0.00173052	0.000523181	0.000804894	0.000442692
OTU_131	k__Bacteria; p__Bacteroidetes; c__Flavobacteriia; o__Flavobacteriales; f__Cryomorphaceae; g__; s__	0.000643915	8.04894e-05	0.000160979	0.000120734	8.04894e-05	8.04894e-05	0.000201223	0.000201223	4.02447e-05	0.00100612	0.000804894	0.00132807	0.000120734	4.02447e-05	0	0.000201223	8.04894e-05	0.000201223	4.02447e-05	4.02447e-05	0	4.02447e-05	8.04894e-05	4.02447e-05	4.02447e-05	0	4.02447e-05	4.02447e-05	4.02447e-05	0	0.000160979	0.000201223	0.000160979	0.000160979	0.000201223	0.000120734	0.000402447	0.000523181	0.000804894	0.00185126	0.0030586	0.00181101	0.00249517	0.00229395	0.00301835	0.00173052	0.000925628	0.000965873
OTU_3472	k__Bacteria; p__Bacteroidetes; c__Flavobacteriia; o__Flavobacteriales; f__Flavobacteriaceae; g__Flavobacterium; s__succinicans	0.00309884	0.000563426	0.00185126	0.000482936	0.000241468	0.000321958	0.000241468	0.000281713	0.000120734	0.000402447	0.000201223	0.000201223	0.000362202	0.000120734	0.000442692	0.000442692	0.000241468	0.000442692	0.000241468	0.000201223	4.02447e-05	0.00181101	0.00132807	0.0018915	0.000845138	0.000362202	0.00173052	0.000241468	0.000321958	0.000201223	0.000362202	0.000442692	0.000362202	0.000402447	0.000120734	0.000160979	0.000362202	0.000160979	0.000281713	0.000442692	0.000442692	0.000281713	0.000442692	0.000482936	0.000442692	0.000362202	0.000321958	0.000321958
OTU_11780	k__Bacteria; p__Proteobacteria; c__Gammaproteobacteria; o__Pseudomonadales; f__Pseudomonadaceae; g__Pseudomonas	0.00100612	0.00068416	0.00068416	0.000643915	0.000643915	0.00060367	0.000402447	0.00068416	0.000643915	0.000724404	0.000724404	0.000764649	0.000643915	0.00100612	0.000563426	0.000643915	0.000482936	0.00068416	0.00108661	0.000402447	0.00120734	0.000804894	0.000281713	0.000724404	0.000724404	0.000804894	0.000482936	0.000885383	0.000764649	0.000643915	0.000362202	0.000845138	0.000523181	0.000402447	0.000442692	0.000523181	0.000523181	0.000442692	0.000804894	0.000563426	0.000764649	0.000362202	0.000563426	0.000281713	0.000402447	0.000925628	0.000523181	0.000804894
OTU_117	k__Bacteria; p__Verrucomicrobia; c__Opitutae; o__Opitutales; f__Opitutaceae; g__; s__	0.00108661	0.000442692	0.00100612	0.000764649	0.00060367	0.000965873	0.00144881	0.00112685	0.00124759	4.02447e-05	0	4.02447e-05	0.00124759	0.000241468	0.000885383	0.00132807	0.000965873	0.00100612	4.02447e-05	8.04894e-05	0	0.000160979	0.000160979	0.000241468	0.000120734	8.04894e-05	8.04894e-05	0.000845138	0.000885383	0.000482936	0.000925628	0.00060367	0.000563426	0.000804894	0.000241468	0.000442692	0.00100612	0.000885383	0.00120734	0.000362202	0.000321958	0.000402447	0.00100612	0.00253542	0.00165003	0.000402447	0.000281713	0.000120734
OTU_106	k__Bacteria; p__Bacteroidetes; c__Cytophagia; o__Cytophagales; f__Cytophagaceae; g__; s__	0.000885383	0.000362202	0.000724404	0.000885383	0.000764649	0.000482936	0.000523181	0.000845138	0.000724404	0.000643915	0.000845138	0.00100612	0.000523181	0.000523181	0.00108661	0.000845138	0.000724404	0.00060367	0.000281713	0.000402447	0.000321958	0.000523181	0.000885383	0.000764649	0.000442692	0.000281713	0.000241468	0.000281713	0.00068416	0.000724404	0.00068416	0.000885383	0.00068416	0.00060367	0.000764649	0.000764649	0.000482936	0.000482936	0.000402447	0.000362202	0.00104636	0.000724404	0.000442692	0.00068416	0.00068416	0.000523181	0.000523181	0.000482936
OTU_15822	k__Bacteria; p__Actinobacteria; c__Actinobacteria; o__Actinomycetales; f__ACK-M1; g__; s__	0.000523181	0.000724404	0.000523181	0.00068416	0.000362202	0.000362202	0.000885383	0.000804894	0.000241468	0.00165003	0.00245493	0.00132807	0.000402447	4.02447e-05	0.000442692	0.000523181	0.000402447	0.000281713	4.02447e-05	0	0	0.0011671	0.00104636	0.000925628	0.00108661	0.000362202	0.000845138	0.000402447	0.000321958	0.000523181	0.000764649	0.000965873	0.000563426	0.000724404	0.000724404	0.000764649	4.02447e-05	0.000120734	0.000160979	8.04894e-05	8.04894e-05	0.000201223	0.000120734	0.000120734	0.000241468	0.000241468	0.000281713	0.000160979
OTU_20374	k__Bacteria; p__Bacteroidetes; c__Cytophagia; o__Cytophagales; f__Cytophagaceae; g__; s__	0.000241468	0.000160979	0.000321958	0.000201223	0.000281713	0.000160979	0.000281713	0.000160979	0.000241468	0.00068416	0.00160979	0.000925628	0.000201223	0.000160979	0.000321958	0.000160979	0.000120734	0.000241468	4.02447e-05	0.000160979	4.02447e-05	0.0015293	0.0018915	0.00173052	0.000120734	0	0.000120734	0	8.04894e-05	8.04894e-05	0.000201223	8.04894e-05	4.02447e-05	0.000160979	0.000201223	0.000362202	0.000120734	4.02447e-05	4.02447e-05	0.000281713	0.000160979	0.000160979	4.02447e-05	8.04894e-05	0	0.000201223	4.02447e-05	0.000281713
OTU_13015	k__Bacteria; p__Verrucomicrobia; c__Opitutae; o__Opitutales; f__Opitutaceae; g__Opitutus; s__	0.000643915	0.000402447	0.00068416	8.04894e-05	0.000362202	0.000563426	0.000563426	0.000563426	0.00068416	4.02447e-05	4.02447e-05	0	0.00060367	4.02447e-05	0.000442692	0.000321958	0.00100612	0.000845138	8.04894e-05	0.000281713	0.000120734	0.000160979	0.000321958	8.04894e-05	0.000402447	0.00060367	0.000321958	0.000402447	0.000241468	0.000724404	0.000523181	0.000241468	0.000482936	0.00112685	0.000804894	0.000523181	0.00217321	0.00205248	0.00177077	0.000563426	0.000925628	0.000442692	0.00229395	0.0018915	0.00313909	0.000402447	0.000281713	0.000241468
OTU_118	k__Bacteria; p__Bacteroidetes; c__Sphingobacteriia; o__Sphingobacteriales; f__Sphingobacteriaceae; g__; s__	0.000362202	0.000281713	0.000241468	0.000442692	0.00060367	0.000643915	0.00120734	0.000764649	0.000804894	8.04894e-05	0	8.04894e-05	0.00068416	0.000442692	0.000845138	0.000764649	0.000563426	0.000724404	0	0	4.02447e-05	8.04894e-05	8.04894e-05	8.04894e-05	0	4.02447e-05	8.04894e-05	0.000321958	0.000321958	0.000362202	0.000442692	0.000241468	0.000241468	0.000442692	0.000281713	0.000482936	0.000402447	0.000281713	0.000362202	0.000563426	0.000643915	0.000523181	0.00193175	0.00265615	0.00205248	0.00128783	0.00128783	0.000845138
OTU_129	k__Bacteria; p__Proteobacteria; c__Alphaproteobacteria; o__Caulobacterales; f__Caulobacteraceae; g__Phenylobacterium; s__	0.00068416	0.000804894	0.00100612	0.000402447	0.000804894	0.00068416	0.000523181	0.000362202	0.00060367	0.000724404	0.000442692	0.000402447	0.000724404	0.000845138	0.00112685	0.000563426	0.000523181	0.000442692	0.00100612	0.000925628	0.000925628	0.000845138	0.000523181	0.000643915	0.00100612	0.000925628	0.00108661	0.00068416	0.000442692	0.000362202	0.000321958	0.000523181	0.000482936	0.000804894	0.000764649	0.000241468	0.000724404	0.000845138	0.000482936	0.000321958	0.000362202	0.000563426	0.000482936	0.000442692	0.000241468	0.00060367	0.000523181	0.000442692
OTU_13637	k__Bacteria; p__Cyanobacteria; c__Oscillatoriophycideae; o__Oscillatoriales; f__Phormidiaceae; g__Phormidium; s__	0.000925628	0.00068416	0.00120734	0.0015293	0.00325982	0.000764649	0.000563426	0.00060367	0.000442692	0.000241468	0.000120734	0.000201223	0.000482936	0.00104636	0.000563426	0.000925628	0.00060367	0.00068416	0.000160979	0.000362202	0.000523181	0.000925628	0.00104636	0.00124759	0.000362202	0.000160979	0.0015293	0.000845138	0.000965873	0.000804894	0.000643915	0.000160979	0.000563426	0.000362202	0.00068416	0.000241468	0.00060367	0.000160979	0.000482936	0.000442692	0.000845138	0.000643915	0.000523181	0.000724404	0.000241468	0.000281713	0.000241468	0.000362202
OTU_16532	k__Bacteria; p__Proteobacteria; c__Betaproteobacteria; o__Burkholderiales; f__Comamonadaceae	0.000321958	0.00060367	0.000643915	0.000120734	0.000201223	0.000241468	0.000442692	0.000281713	0.000201223	0.000241468	0.000402447	0.000160979	0.000643915	0.000482936	0.000482936	0.000241468	0.000402447	0.000482936	0.000321958	0.000563426	0.000523181	0.00209272	0.00237444	0.00370251	0.000281713	0.000201223	0.000241468	0.000321958	0.000925628	0.00068416	0.000160979	0.000402447	0.00060367	0.000362202	0.000160979	0.000201223	0.000201223	0.000120734	0.000321958	0.0011671	0.000402447	0.000885383	0.000120734	0.000120734	8.04894e-05	0.00068416	0.000442692	0.000804894
OTU_10694	k__Bacteria; p__Actinobacteria; c__Actinobacteria; o__Actinomycetales; f__ACK-M1; g__; s__	0.000402447	0.000563426	0.000160979	0.000402447	0.000321958	0.000201223	0.00060367	0.000885383	0.000241468	0.00201223	0.00321958	0.00221346	0.000201223	0.000201223	0.000362202	0.000442692	0.00060367	0.000241468	4.02447e-05	8.04894e-05	0.000120734	0.000442692	0.000160979	8.04894e-05	0.000201223	0.000402447	0.000201223	0.000120734	0.000281713	0.000482936	0.000402447	0.00104636	0.000442692	0.000442692	0.000482936	0.00060367	0.000281713	0.000523181	0.000160979	0.000442692	0.000160979	0.000321958	0.000201223	0.00060367	0.000402447	0.000241468	0.000362202	0.000402447
OTU_14334	k__Bacteria; p__Proteobacteria; c__Betaproteobacteria; o__Burkholderiales; f__Comamonadaceae; g__; s__	0.00140856	0.000925628	0.00128783	0.000321958	0.000120734	0.000281713	0.000201223	0.000321958	0.000402447	4.02447e-05	0.000120734	0	0.000442692	0.000321958	0.000442692	0.000281713	0.000281713	0.000201223	0.000120734	8.04894e-05	8.04894e-05	0.000764649	0.000281713	0.000362202	4.02447e-05	0.000160979	4.02447e-05	0.000201223	0.000281713	0.000241468	0.000482936	0.000321958	0.00120734	0.000281713	0.000362202	0.000362202	8.04894e-05	0.000201223	0.000201223	0.00563426	0.00555377	0.00539279	0.000442692	0.000201223	4.02447e-05	0.000241468	0.000724404	0.000241468
OTU_0	k__Bacteria; p__Actinobacteria; c__Actinobacteria; o__Actinomycetales; f__ACK-M1; g__; s__	0.000643915	0.00060367	0.000764649	0.000563426	0.000482936	0.000764649	0.00108661	0.00112685	0.000402447	0.000160979	0.000241468	0.000160979	0.00068416	8.04894e-05	0.000724404	0.00140856	0.00060367	0.000845138	0.000120734	0.000160979	0.000160979	0.000201223	8.04894e-05	0.000321958	4.02447e-05	0.000160979	8.04894e-05	0.000523181	0.000563426	0.000804894	0.00112685	0.00177077	0.000885383	0.000724404	0.00108661	0.00156954	0.000482936	0.000845138	0.000482936	0.000442692	0.000442692	0.000804894	0.000482936	0.000925628	0.00060367	0.000523181	0.000563426	0.000241468
OTU_98	k__Bacteria; p__Proteobacteria; c__Betaproteobacteria; o__Burkholderiales; f__Comamonadaceae; g__; s__	0.00124759	0.000281713	0.000643915	0.000321958	0.000362202	0.000160979	4.02447e-05	4.02447e-05	4.02447e-05	0.000201223	0.000362202	0.000402447	0.000321958	0.000241468	0.000281713	4.02447e-05	8.04894e-05	0.000201223	0.00450741	0.00201223	0.0049501	0.000482936	0.000442692	0.000120734	0.000281713	0.00124759	0.000201223	0.000321958	0.000925628	0.000281713	0.000241468	0.000442692	8.04894e-05	0.000442692	0.00120734	4.02447e-05	0.000201223	0.000160979	0.000321958	0.000321958	0.00060367	0.00060367	0.000160979	4.02447e-05	0	0.00205248	0.00205248	0.00128783
OTU_9779	k__Bacteria; p__Proteobacteria; c__Betaproteobacteria; o__Burkholderiales; f__Comamonadaceae; g__Leptothrix; s__	0.00120734	0.00100612	0.000925628	0.000442692	0.000160979	0.000201223	0.000160979	0.000281713	0.000321958	0.000120734	0.000362202	0.000362202	0.000563426	0.00104636	0.000362202	0.000201223	0.000281713	0.000321958	0.000402447	0.000201223	0.000643915	0.000482936	0.000241468	0.000563426	4.02447e-05	0.00144881	0.000241468	0.000724404	0.00068416	0.000442692	0.00068416	0.000241468	0.000281713	0.000925628	0.00446716	0.000321958	0.000845138	0.000643915	0.000241468	0.00068416	0.000321958	0.000563426	0.000563426	0.000201223	8.04894e-05	0.00233419	0.00185126	0.00177077
OTU_144	k__Bacteria; p__Proteobacteria; c__Alphaproteobacteria; o__Rhizobiales; f__Methylocystaceae; g__; s__	0.00140856	0.00160979	0.00144881	0.000724404	0.0011671	0.00100612	0.000523181	0.000563426	0.000965873	0.000201223	8.04894e-05	0.000482936	0.00060367	0.000965873	0.000885383	0.000643915	0.000885383	0.000965873	0.000241468	0.000160979	4.02447e-05	0.000120734	8.04894e-05	8.04894e-05	0.000362202	0.000281713	0.00060367	0.000281713	0.000724404	0.000482936	0.00060367	0.000402447	0.000482936	0.000442692	0.000321958	0.000281713	0.00173052	0.00169028	0.00104636	0.000764649	0.000321958	0.000362202	0.000925628	0.000965873	0.00112685	0.000281713	0.000523181	0.000362202
OTU_2007	k__Bacteria; p__Proteobacteria; c__Alphaproteobacteria; o__Sphingomonadales; f__Erythrobacteraceae; g__; s__	0.000321958	0.000241468	0.000241468	0.000120734	0.00060367	0.000201223	0.000160979	0.000120734	0.000120734	0.000321958	0.000160979	0.000201223	8.04894e-05	0.00104636	0.000442692	0.000120734	0.000321958	0.000201223	0.00156954	0.00165003	0.000925628	0.000804894	0.000764649	0.000523181	0.00426594	0.00426594	0.00301835	0.000321958	0.000724404	0.000362202	0.000201223	0.000201223	0.000281713	0.000442692	0.000321958	0.000281713	0.0011671	0.00104636	0.00120734	0.00060367	0.000523181	0.000281713	0.000281713	0.000160979	0.000160979	0.000241468	0.000201223	0.000201223
OTU_122	k__Bacteria; p__Bacteroidetes; c__Bacteroidia; o__Bacteroidales; f__S24-7; g__; s__	0.000764649	0.000201223	0.000362202	0.000563426	0.000885383	0.000885383	0.000523181	0.000321958	0.000523181	0.000764649	0.000804894	0.00068416	0.000442692	0.000482936	0.000724404	0.000764649	0.000643915	0.000724404	0.000482936	0.000563426	0.000281713	0.00104636	0.00060367	0.000362202	0.000482936	0.000281713	0.000321958	0.000523181	0.000321958	0.000643915	0.000442692	0.000402447	0.000643915	0.000362202	0.000362202	0.000724404	0.000442692	0.000362202	0.000442692	0.000845138	0.000925628	0.000643915	0.00100612	0.000965873	0.000885383	0.00060367	0.000804894	0.000321958
OTU_99	k__Bacteria; p__Bacteroidetes; c__Flavobacteriia; o__Flavobacteriales; f__Cryomorphaceae; g__; s__	0.000281713	0.000482936	0.000160979	0.00144881	0.00205248	0.00217321	0.00100612	0.00144881	0.00205248	0.000482936	0.000321958	0.000804894	0.00100612	0.00156954	0.0015293	0.00169028	0.00253542	0.00181101	4.02447e-05	0.000160979	8.04894e-05	0.000563426	0.000321958	0.000160979	4.02447e-05	4.02447e-05	4.02447e-05	0.000643915	0.000523181	0.000402447	0.000482936	0.000643915	0.000241468	0.000160979	0.000160979	0.000201223	0.000120734	4.02447e-05	0	0.000160979	8.04894e-05	0.000160979	0.00068416	0.000321958	0.000643915	0.00060367	0.000804894	0.000764649
OTU_180	k__Bacteria; p__Actinobacteria; c__Actinobacteria; o__Actinomycetales; f__ACK-M1; g__; s__	0.000965873	0.00060367	0.00068416	0.000643915	0.000321958	0.000321958	0.000643915	0.000643915	0.000643915	4.02447e-05	8.04894e-05	4.02447e-05	0.000764649	0.000160979	0.000362202	0.000845138	0.000442692	0.000523181	0.000241468	0.000281713	0.000442692	0.000402447	0.000281713	0.000362202	0	0	4.02447e-05	0.00060367	0.000643915	0.000563426	0.00100612	0.000885383	0.000321958	0.00136832	0.00136832	0.00197199	0.000402447	0.000442692	0.000241468	0.000160979	0.000120734	4.02447e-05	8.04894e-05	0.000321958	8.04894e-05	4.02447e-05	0.000120734	0.000120734
OTU_15055	k__Bacteria; p__Proteobacteria; c__Alphaproteobacteria; o__Caulobacterales; f__Caulobacteraceae; g__Brevundimonas; s__diminuta	0.000845138	0.000643915	0.00100612	0.000563426	0.000563426	0.000643915	0.000563426	0.000885383	0.00068416	0.00060367	0.000563426	0.000563426	0.00068416	0.000764649	0.00068416	0.000523181	0.00068416	0.000563426	0.00104636	0.000643915	0.000764649	0.000724404	0.000643915	0.000804894	0.000885383	0.000643915	0.000925628	0.000362202	0.000563426	0.000402447	0.000362202	0.000362202	0.000402447	0.000482936	0.000442692	0.000523181	0.000281713	0.000482936	0.000563426	0.000281713	0.000563426	0.000724404	0.000402447	0.000241468	0.000402447	0.000643915	0.000402447	0.000804894
OTU_142	k__Bacteria; p__Proteobacteria; c__Alphaproteobacteria; o__Rhodospirillales; f__Rhodospirillaceae; g__; s__	0.000563426	0.00108661	0.000563426	0.000241468	0.000281713	0.000362202	0.000160979	0.000241468	0.000563426	0	0	0	0.000281713	0.000482936	0.000321958	0.000160979	0.000442692	0.000643915	4.02447e-05	4.02447e-05	0	0	0	0	4.02447e-05	0.000120734	0.000201223	0.000201223	0.000442692	0.000563426	0.000442692	0.000120734	0.000362202	0.000321958	0.000362202	0.000321958	0.0030586	0.00265615	0.00338055	0.00181101	0.000845138	0.000845138	0.00229395	0.00249517	0.0026159	0.00068416	0.000523181	8.04894e-05
OTU_8382	k__Bacteria; p__Planctomycetes; c__Planctomycetia; o__Gemmatales; f__Gemmataceae; g__; s__	0.000402447	0.000442692	0.000643915	0.00169028	0.00169028	0.00100612	0.000442692	0.000442692	0.00112685	4.02447e-05	0	4.02447e-05	0.000563426	0.00104636	0.000965873	0.00136832	0.00177077	0.00273664	0.000362202	0.000281713	0	0	4.02447e-05	0	0.000764649	0.000241468	0.00060367	0.00144881	0.000965873	0.0015293	0.00148905	0.00160979	0.00140856	0.00140856	0.000201223	0.00160979	0.000402447	0.000442692	0.00060367	0	4.02447e-05	8.04894e-05	0.000160979	0	0	0	4.02447e-05	8.04894e-05
OTU_123	k__Bacteria; p__Bacteroidetes; c__Bacteroidia; o__Bacteroidales; f__S24-7; g__; s__	0.000563426	0.000362202	0.000643915	0.000442692	0.000563426	0.000724404	0.000764649	0.000965873	0.000563426	0.000724404	0.000523181	0.000523181	0.00060367	0.000724404	0.000764649	0.00108661	0.000965873	0.000845138	0.000523181	0.000482936	0.000281713	0.000563426	0.000563426	0.00068416	0.000281713	0.000362202	0.00060367	0.000402447	0.000442692	0.000442692	0.00068416	0.000402447	0.000643915	0.00060367	0.000563426	0.000563426	0.000281713	0.000523181	0.000563426	0.000643915	0.000885383	0.000643915	0.000764649	0.000563426	0.000643915	0.000362202	0.000442692	0.000442692
OTU_13548	k__Bacteria; p__Cyanobacteria; c__Chloroplast; o__Stramenopiles; f__; g__; s__	0.00197199	0.00104636	0.00165003	0.000965873	0.00068416	0.000885383	0.00104636	0.000563426	0.00128783	0	0	0	0.000523181	0.000482936	0.000764649	0.00100612	0.00100612	0.00108661	0.000482936	0.00313909	0.000362202	0.000402447	0.000523181	0.000402447	8.04894e-05	0.000201223	4.02447e-05	0.00068416	0.000362202	0.000281713	0.000402447	0.00068416	0.000281713	0.00205248	0.00100612	0.0026159	0.00104636	0.00060367	0.000845138	8.04894e-05	8.04894e-05	0	0.000120734	0	0.000120734	4.02447e-05	8.04894e-05	0
OTU_13103	k__Bacteria; p__Proteobacteria; c__Alphaproteobacteria; o__Sphingomonadales; f__Sphingomonadaceae; g__Novosphingobium; s__	0.000321958	0.000523181	0.000402447	0.000402447	0.00112685	0.000724404	0.000362202	0.000321958	0.00060367	0.000362202	0.000201223	0.00060367	0.000523181	0.000804894	0.000523181	0.000482936	0.000643915	0.000523181	0.000281713	0.000764649	0.000201223	0.000764649	0.000523181	0.000362202	0.00301835	0.00173052	0.00201223	0.000724404	0.00136832	0.0018915	0.000482936	0.000724404	0.000442692	0.000523181	0.000402447	0.000281713	0.000201223	0.000523181	0.000523181	0.000281713	0.000160979	0.000120734	8.04894e-05	0.000120734	4.02447e-05	0.000482936	8.04894e-05	0.000402447
OTU_136	k__Bacteria; p__Bacteroidetes; c__Sphingobacteriia; o__Sphingobacteriales; f__; g__; s__	0.000764649	4.02447e-05	0.000442692	0.000643915	0.000321958	0.000724404	0.000643915	0.000764649	0.000845138	0.0041452	0.00402447	0.00350129	0.000643915	0.000160979	0.000523181	0.000281713	0.000402447	0.000281713	0	4.02447e-05	0	0.00132807	0.00177077	0.00124759	4.02447e-05	0	0	0.000241468	0.000160979	0.000120734	0.000321958	0.000120734	4.02447e-05	4.02447e-05	8.04894e-05	0.000160979	0	0	0	0	4.02447e-05	8.04894e-05	4.02447e-05	0	0	0	0	8.04894e-05
OTU_6842	k__Bacteria; p__Proteobacteria; c__Gammaproteobacteria; o__Xanthomonadales; f__Xanthomonadaceae; g__Lysobacter; s__	0.000120734	0.000362202	0.000120734	0.000120734	0.000523181	0.000201223	4.02447e-05	8.04894e-05	0.000241468	0.000120734	4.02447e-05	4.02447e-05	0.000120734	0.000482936	0.000241468	8.04894e-05	0.000281713	0.000402447	0.00148905	0.00181101	0.00124759	8.04894e-05	8.04894e-05	0.000241468	0.00374276	0.00297811	0.00313909	0.00068416	0.000885383	0.00100612	4.02447e-05	0.000160979	0.000241468	0.00068416	0.00321958	0.000764649	0.000201223	0.000845138	0.000201223	0	0.000241468	4.02447e-05	0.00140856	0.000402447	0.000120734	0.000482936	0.000201223	0.000925628
OTU_18324	k__Bacteria; p__Actinobacteria; c__Actinobacteria; o__Actinomycetales; f__ACK-M1; g__; s__	0.000482936	0.000523181	0.000482936	0.000764649	0.000442692	0.000885383	0.00112685	0.00112685	0.000925628	0.00120734	0.00160979	0.000643915	0.000965873	0.000321958	0.000965873	0.000764649	0.000563426	0.000724404	0.000321958	0.000442692	0.000442692	0.000241468	4.02447e-05	0.000120734	0.000241468	4.02447e-05	0	0.000482936	0.000482936	0.00112685	0.0011671	0.00156954	0.000845138	0.000885383	0.000764649	0.00104636	0.000482936	0.000160979	0.000160979	0.000160979	0.000321958	0.000362202	0.000160979	0.000321958	0.000120734	8.04894e-05	0.000281713	0.000241468
OTU_8102	k__Bacteria; p__Proteobacteria; c__Betaproteobacteria; o__Burkholderiales; f__Comamonadaceae; g__Hydrogenophaga; s__	8.04894e-05	8.04894e-05	0.000120734	0.000160979	0.000201223	0.000160979	0	0	0	0.000120734	0.000321958	0.000201223	0	0.000201223	0	0	4.02447e-05	0.000120734	0.00857212	0.011671	0.00374276	0.000281713	0.000160979	0.000120734	4.02447e-05	0.000402447	0.000120734	0.000241468	0.00100612	0.00068416	4.02447e-05	0.000120734	0.000160979	0.000120734	8.04894e-05	0.000120734	4.02447e-05	8.04894e-05	0.000160979	8.04894e-05	0.000160979	0.000120734	0	8.04894e-05	0	0.000281713	0.000563426	0.000321958
OTU_97	k__Bacteria; p__Actinobacteria; c__Actinobacteria; o__Actinomycetales; f__Nocardioidaceae; g__; s__	4.02447e-05	0.000120734	0	0.000201223	8.04894e-05	0.000120734	8.04894e-05	8.04894e-05	4.02447e-05	0.000160979	8.04894e-05	0.000120734	4.02447e-05	0.000120734	0.000120734	8.04894e-05	8.04894e-05	0.000241468	0.000402447	0.000402447	0	0.000120734	0	0	0.00068416	0.00136832	0.000965873	0.000442692	0.000885383	0.00165003	0.000120734	8.04894e-05	0.000201223	0.00309884	0.00124759	0.00450741	8.04894e-05	0.000201223	0.000160979	0.000362202	0.000120734	0	0.00668062	0.00165003	0	0.000845138	0.000281713	0.00060367
OTU_19386	k__Bacteria; p__Bacteroidetes; c__Flavobacteriia; o__Flavobacteriales; f__Flavobacteriaceae; g__Flavobacterium; s__succinicans	0.00221346	0.000643915	0.00144881	0.000764649	0.00068416	0.000321958	4.02447e-05	0.000281713	0.000281713	0	4.02447e-05	0	0.000321958	0.000120734	0.000160979	0.000482936	0.000482936	0.000482936	0.000321958	0.000442692	0.000402447	0.000885383	0.00124759	0.00160979	0.00253542	0.00060367	0.00213297	0.000241468	0.000241468	0.000241468	0.000563426	0.000281713	0.000321958	0.000160979	0.000160979	0.000402447	0.000362202	0.000201223	0.000241468	0.00136832	0.00108661	0.00120734	0.000563426	0.000241468	0.000442692	0.000362202	0.000281713	8.04894e-05
OTU_20152	k__Bacteria; p__Bacteroidetes; c__[Saprospirae]; o__[Saprospirales]; f__Saprospiraceae; g__Aquirestis; s__calciphila	0.000402447	0.00060367	0.000362202	0.00144881	0.0011671	0.00169028	0.000362202	0.000764649	0.0015293	0.00136832	0.000965873	0.00160979	0.000563426	0.000643915	0.00112685	0.000523181	0.000885383	0.000885383	4.02447e-05	0.000281713	0.000120734	0.000241468	0.000120734	0.000160979	0.000563426	0.000482936	0.000281713	0.000925628	0.00104636	0.000764649	0.00140856	0.000925628	0.000885383	0.00060367	0.000442692	0.000885383	0.00100612	0.000160979	0.000523181	0.000201223	0.000281713	0.000362202	0.000321958	0.000241468	0.000241468	8.04894e-05	0	0.000160979
OTU_12775	k__Bacteria; p__Proteobacteria; c__Alphaproteobacteria; o__Sphingomonadales; f__; g__; s__	0.000201223	0.000402447	0.000281713	0.00104636	0.00205248	0.00165003	0.00128783	0.00124759	0.00160979	0	0	0	0.00068416	0.000442692	0.00068416	0.00144881	0.00132807	0.00140856	0.000120734	0.000120734	4.02447e-05	8.04894e-05	0.000160979	8.04894e-05	0.000241468	4.02447e-05	0.000321958	0.000965873	0.00144881	0.00193175	0.00132807	0.00201223	0.0022537	0.000804894	0.00060367	0.0011671	8.04894e-05	0.000241468	4.02447e-05	8.04894e-05	8.04894e-05	8.04894e-05	8.04894e-05	0	0.000120734	8.04894e-05	0.000160979	0
OTU_112	k__Bacteria; p__Actinobacteria; c__Actinobacteria; o__Actinomycetales; f__Nocardioidaceae; g__; s__	4.02447e-05	0.000402447	4.02447e-05	0.000160979	0.000120734	0.000120734	0	8.04894e-05	8.04894e-05	8.04894e-05	8.04894e-05	0	4.02447e-05	0.000160979	0.000160979	4.02447e-05	0	0.000241468	0.000201223	0.000201223	0.000281713	0	4.02447e-05	4.02447e-05	0.000402447	0.0049501	0.000643915	0.000321958	0.00068416	0.000724404	4.02447e-05	8.04894e-05	0.000120734	0.00643915	0.0011671	0.00350129	0.000241468	0.00185126	0.000281713	0.000563426	0.000563426	0.000120734	0.00165003	0.000482936	8.04894e-05	0.000281713	0.000724404	8.04894e-05
OTU_166	k__Bacteria; p__Planctomycetes; c__Planctomycetia; o__Planctomycetales; f__Planctomycetaceae; g__Planctomyces; s__	0.00193175	0.00140856	0.00209272	0.000925628	0.000402447	0.000241468	0.000201223	0.000442692	0.00112685	0	0	8.04894e-05	0.000362202	0.00068416	0.000201223	0.000362202	0.000482936	0.000885383	0.000201223	0.000281713	0.000120734	0	0	0	4.02447e-05	0	4.02447e-05	0.00120734	0.000321958	0.00060367	0.00221346	0.000563426	0.00108661	0.00193175	0.000523181	0.00100612	0.00181101	0.0015293	0.00112685	0.000160979	0	0.000120734	0.00132807	0.000442692	0.000764649	0.000160979	0.000281713	0.000201223
OTU_143	k__Bacteria; p__Actinobacteria; c__Acidimicrobiia; o__Acidimicrobiales; f__C111; g__; s__	0.000442692	0.000804894	0.0015293	0.00108661	0.00148905	0.00112685	0.000643915	0.000925628	0.00124759	0	4.02447e-05	0	0.000482936	0.00193175	0.00136832	0.00108661	0.00104636	0.000925628	0.000281713	0.000523181	0.000482936	0.000120734	0.000160979	0.000120734	0	8.04894e-05	8.04894e-05	0.000804894	0.00144881	0.00205248	0.00108661	0.00060367	0.00136832	0.000804894	0.000482936	0.00120734	8.04894e-05	0.000442692	0.000120734	0	0	0	0	0.000281713	0.000160979	0	8.04894e-05	0
OTU_146	k__Bacteria; p__Cyanobacteria; c__Chloroplast; o__Chlorophyta; f__Trebouxiophyceae; g__; s__	0	4.02447e-05	0	4.02447e-05	0	0	4.02447e-05	0	4.02447e-05	0.000201223	0.000120734	0.000281713	4.02447e-05	4.02447e-05	4.02447e-05	8.04894e-05	0	8.04894e-05	0	0	4.02447e-05	8.04894e-05	0.000160979	8.04894e-05	0	0	0	4.02447e-05	0	8.04894e-05	0	0	4.02447e-05	4.02447e-05	8.04894e-05	8.04894e-05	0.00402447	0.00354153	0.0056745	0.00398422	0.00289762	0.00173052	0.00321958	0.000845138	0.00112685	0.000402447	0.000563426	0.000241468
OTU_18366	k__Bacteria; p__Actinobacteria; c__Actinobacteria; o__Actinomycetales; f__ACK-M1; g__; s__	0.000241468	0.000442692	0.000321958	0.000281713	0.000281713	0.000321958	0.000442692	0.00060367	0.000362202	0.00213297	0.00293786	0.00185126	0.000402447	0.000241468	0.000201223	0.000281713	0.000563426	0.000321958	4.02447e-05	8.04894e-05	8.04894e-05	0.000120734	0.000281713	0.000120734	0.000160979	0.000160979	4.02447e-05	0.000201223	0.000120734	0.000201223	0.000724404	0.000563426	0.000160979	0.000241468	0.000442692	0.000362202	0.000362202	0.000482936	0.000321958	0.000482936	0.000362202	0.000804894	0.000362202	0.000442692	0.000965873	0.000281713	0.000120734	0.000241468
OTU_19378	k__Bacteria; p__Bacteroidetes; c__Flavobacteriia; o__Flavobacteriales; f__Flavobacteriaceae; g__Flavobacterium; s__	4.02447e-05	0	0	0.000885383	0.000965873	0.00124759	0.00185126	0.00100612	0.00124759	0	0	0	0.000885383	0.000120734	0.00060367	0.0026159	0.0022537	0.00233419	0	0.000362202	0.000201223	4.02447e-05	4.02447e-05	4.02447e-05	0	0	4.02447e-05	0.000965873	0.000563426	0.000362202	0.00120734	0.00245493	0.00128783	0.00128783	0.0011671	0.00160979	0.000120734	8.04894e-05	8.04894e-05	4.02447e-05	0.000241468	0.000160979	0.000321958	8.04894e-05	0.000120734	0.000241468	4.02447e-05	0.000241468
OTU_15407	k__Bacteria; p__Cyanobacteria; c__Chloroplast; o__Stramenopiles; f__; g__; s__	0.00104636	0.000764649	0.00124759	0.00068416	0.000925628	0.00104636	0.00128783	0.000724404	0.000885383	0	0	0	0.000482936	0.000442692	0.00068416	0.000885383	0.000482936	0.00100612	0.000442692	0.00301835	0.000241468	0.000764649	0.00060367	0.000362202	8.04894e-05	8.04894e-05	0.000201223	0.000402447	0.000402447	0.000201223	0.000482936	0.000845138	0.000442692	0.00160979	0.000442692	0.00245493	0.000764649	0.000402447	0.00156954	4.02447e-05	0.000160979	0.000160979	0.000281713	0	0.000281713	4.02447e-05	8.04894e-05	4.02447e-05
OTU_133	k__Bacteria; p__Proteobacteria; c__Alphaproteobacteria; o__Rhodospirillales; f__Rhodospirillaceae; g__Caenispirillum; s__salinarum	0.000764649	0.00060367	0.000523181	0.000482936	0.000563426	0.000442692	0.000362202	0.000402447	0.000321958	0.000523181	0.000241468	0.000724404	0.000563426	0.00060367	0.000643915	0.000643915	0.000362202	0.000724404	0.000845138	0.000482936	0.000885383	0.000523181	0.000321958	0.000241468	0.000965873	0.000845138	0.00100612	0.000442692	0.000442692	0.000402447	0.000724404	0.000281713	0.000402447	0.000160979	0.000442692	0.000523181	0.000402447	0.00100612	0.000442692	0.000442692	0.000281713	0.000724404	0.000482936	0.00068416	0.000643915	0.000643915	0.000482936	0.000885383
OTU_19388	k__Bacteria; p__Bacteroidetes; c__Flavobacteriia; o__Flavobacteriales; f__Flavobacteriaceae; g__Flavobacterium; s__	0.000241468	8.04894e-05	0.000281713	0.00209272	0.00229395	0.00169028	0.00140856	0.00185126	0.0015293	0	8.04894e-05	4.02447e-05	0.000804894	0.000241468	0.00060367	0.00213297	0.00205248	0.00165003	0	0.000120734	4.02447e-05	0.000402447	0.000482936	0.000925628	0.000160979	0.000241468	0.000764649	0.000563426	0.000845138	0.000321958	0.00060367	0.000643915	0.000482936	0.000201223	0.000120734	0.000201223	8.04894e-05	0.000281713	0.000201223	0	0	0	4.02447e-05	0	8.04894e-05	4.02447e-05	0	8.04894e-05
OTU_174	k__Bacteria; p__Bacteroidetes; c__Flavobacteriia; o__Flavobacteriales; f__Cryomorphaceae; g__Fluviicola; s__	0.000523181	4.02447e-05	0.000241468	0.00128783	0.00132807	0.00213297	0.00156954	0.00160979	0.00169028	0	0	0	0.00068416	0.000442692	0.000643915	0.000845138	0.00136832	0.00124759	4.02447e-05	4.02447e-05	0	4.02447e-05	0.000120734	4.02447e-05	0	0	0	0.00068416	0.000643915	0.000160979	0.000885383	0.00132807	0.000402447	0.000321958	0.000201223	0.000482936	0.000160979	8.04894e-05	8.04894e-05	0.000241468	0.000643915	0.000402447	0.00213297	0.00144881	0.00193175	0.000362202	0.000442692	0.000201223
OTU_7933	k__Bacteria; p__Bacteroidetes; c__[Saprospirae]; o__[Saprospirales]; f__Chitinophagaceae; g__; s__	0.000482936	0.00060367	0.000482936	0.000201223	0.000402447	0.000160979	0.000362202	0.000281713	0.000281713	4.02447e-05	4.02447e-05	0	0.000321958	0.000160979	0.000281713	0.000321958	8.04894e-05	0.000362202	0	4.02447e-05	4.02447e-05	0	4.02447e-05	4.02447e-05	0	4.02447e-05	0	0.000120734	0.000201223	0.000241468	0.000442692	0.000402447	0.000201223	0.000160979	0.000281713	0.000482936	0.00160979	0.00100612	0.0011671	0.00205248	0.00173052	0.00277688	0.00112685	0.00205248	0.00120734	0.000764649	0.00124759	0.00060367
OTU_135	k__Bacteria; p__Proteobacteria; c__Gammaproteobacteria; o__Xanthomonadales; f__Xanthomonadaceae; g__Lysobacter; s__	0.000160979	0.000201223	8.04894e-05	0.000120734	0.000482936	8.04894e-05	0.000120734	4.02447e-05	0.000160979	0.000281713	0.000120734	0.000160979	0.000160979	0.000523181	8.04894e-05	0.000160979	8.04894e-05	0.000241468	0.00410496	0.00321958	0.00177077	0.000160979	0.000120734	0.000241468	0.00120734	0.0018915	0.000764649	0.00120734	0.0011671	0.00144881	0.000201223	8.04894e-05	0.000160979	0.000362202	0.000402447	0.000201223	0.000442692	0.000563426	0.000442692	0.000281713	0.000281713	0.000120734	0.000965873	0.000442692	4.02447e-05	0.000845138	0.000281713	0.000362202
OTU_8956	k__Bacteria; p__Actinobacteria; c__Actinobacteria; o__Actinomycetales; f__ACK-M1; g__; s__	0	0.000402447	0.000482936	0.000724404	0.00068416	0.000563426	0.00128783	0.00112685	0.00068416	0.000201223	0.000241468	0.000201223	0.000845138	0.000321958	0.000402447	0.00104636	0.00068416	0.000482936	8.04894e-05	0.000201223	4.02447e-05	0.000160979	0.000160979	0.000201223	4.02447e-05	0.000160979	4.02447e-05	0.00068416	0.000764649	0.000563426	0.000925628	0.00124759	0.00100612	0.000804894	0.000845138	0.00132807	0.000321958	0.000241468	0.000160979	0.000402447	0.000402447	0.000804894	0.000362202	0.00100612	0.000643915	0.000160979	0.000281713	0.000362202
OTU_141	k__Bacteria; p__Bacteroidetes; c__Flavobacteriia; o__Flavobacteriales; f__Flavobacteriaceae; g__Flavobacterium; s__gelidilacus	4.02447e-05	8.04894e-05	0	0.000321958	0.000160979	0.000201223	0.000201223	8.04894e-05	4.02447e-05	4.02447e-05	0	0	4.02447e-05	0.000120734	8.04894e-05	0.000442692	0.000241468	0.000241468	0.000965873	0.00120734	0.00193175	0.00060367	0.000321958	0.00068416	8.04894e-05	4.02447e-05	4.02447e-05	4.02447e-05	8.04894e-05	4.02447e-05	0.000201223	4.02447e-05	4.02447e-05	0.000160979	4.02447e-05	0.000120734	0.000804894	0.00112685	0.00144881	0.000362202	0.00060367	0.000442692	0.00317933	0.00249517	0.00370251	0.00209272	0.00112685	0.0015293
OTU_7	k__Bacteria; p__Bacteroidetes; c__Cytophagia; o__Cytophagales; f__Cyclobacteriaceae	0.00140856	0.000965873	0.000845138	0.000241468	0.000120734	0.000563426	0.000643915	0.00060367	0.000563426	0.000764649	0.000845138	0.00104636	0.000643915	0.000281713	0.00104636	0.00100612	0.00100612	0.000885383	0	0.000281713	4.02447e-05	0.000281713	8.04894e-05	8.04894e-05	0.000120734	0.000160979	4.02447e-05	0.00068416	0.000281713	0.000321958	0.000563426	0.000643915	0.00060367	0.000643915	0.000442692	0.000482936	0.000201223	0.000160979	0.000160979	0.00128783	0.00169028	0.00128783	0.000442692	0.00060367	0.000281713	0.000402447	0.000281713	0.000281713
OTU_19985	k__Bacteria; p__Bacteroidetes; c__[Saprospirae]; o__[Saprospirales]; f__Chitinophagaceae; g__Sediminibacterium; s__	0.000643915	0.00060367	0.00060367	0.000160979	0.000402447	0.000643915	0.000885383	0.000482936	0.00060367	0.00100612	0.00108661	0.00132807	0.00068416	0.000281713	0.000362202	0.00068416	0.000321958	0.000804894	0.000201223	0.000201223	0.000321958	0.000764649	0.000563426	0.000241468	8.04894e-05	4.02447e-05	4.02447e-05	0.000160979	0.000201223	0.000321958	0.000241468	0.000442692	0.000442692	0.000321958	0.000482936	0.000402447	0.000201223	8.04894e-05	8.04894e-05	0.000643915	0.000724404	0.00068416	0.000402447	0.000563426	0.000321958	0.000201223	0.000160979	0.000241468
OTU_154	k__Bacteria; p__Bacteroidetes; c__Bacteroidia; o__Bacteroidales; f__S24-7; g__; s__	0.00068416	0.000402447	0.000241468	0.000643915	0.000362202	0.000523181	0.000643915	0.000362202	0.000643915	0.000563426	0.000804894	0.000482936	0.000281713	0.000482936	0.00104636	0.000563426	0.000563426	0.00068416	0.000362202	0.000201223	0.000362202	0.00068416	0.000563426	0.000482936	0.000402447	0.000201223	0.000523181	0.000563426	0.00060367	0.000523181	0.00060367	0.000482936	0.000120734	0.000563426	0.000281713	0.000643915	0.000442692	0.000321958	0.000482936	0.000845138	0.000321958	0.000563426	0.000925628	0.00068416	0.000482936	0.000402447	0.000563426	0.00068416
OTU_2	k__Bacteria; p__Actinobacteria; c__Actinobacteria; o__Actinomycetales; f__ACK-M1; g__; s__	0.000523181	0.000563426	0.000563426	0.000804894	0.00068416	0.00068416	0.00120734	0.00173052	0.000643915	0.000120734	0	8.04894e-05	0.00104636	0.000563426	0.000764649	0.000724404	0.000804894	0.000563426	0.000201223	0.000241468	0.000120734	0.000321958	0.000160979	0.000120734	0.000120734	8.04894e-05	0	0.000804894	0.000362202	0.000925628	0.00104636	0.00124759	0.000724404	0.00060367	0.000885383	0.00104636	0.000523181	0.000442692	0.000321958	0.000362202	0.000523181	0.000362202	0.000201223	0.00060367	0.00060367	8.04894e-05	0.000362202	0.000281713
OTU_149	k__Bacteria; p__Bacteroidetes; c__Sphingobacteriia; o__Sphingobacteriales; f__; g__; s__	0.000482936	0.000281713	0.000201223	0.000845138	0.00100612	0.0011671	0.00104636	0.000965873	0.00112685	0.000724404	0.00060367	0.000804894	0.00140856	0.00169028	0.000804894	0.00100612	0.000925628	0.00148905	0	8.04894e-05	4.02447e-05	0.000160979	8.04894e-05	0.000120734	0.00060367	0.00060367	0.000804894	0.00108661	0.000724404	0.000523181	0.00108661	0.000643915	0.000724404	0.000885383	0.000442692	0.000885383	0.000482936	0.000362202	0.000160979	0.000160979	0.000241468	0.000241468	0.000241468	0.000201223	0.000362202	0.000120734	0.000120734	0.000160979
OTU_163	k__Bacteria; p__Proteobacteria; c__Betaproteobacteria; o__Rhodocyclales; f__Rhodocyclaceae; g__Zoogloea; s__	0.00068416	0.000321958	0.000281713	0.00233419	0.00112685	0.000523181	0.000804894	0.00060367	0.000482936	0.000120734	0.000120734	0.000281713	0.000241468	0.000643915	0.000523181	0.000442692	0.000523181	0.000281713	0.000563426	0.000321958	0.000201223	0.000241468	0.000160979	0.000241468	8.04894e-05	0.000321958	8.04894e-05	0.000482936	0.000241468	0.000241468	0.000321958	0.000241468	0.000120734	8.04894e-05	0.000643915	8.04894e-05	0.000241468	8.04894e-05	0.000201223	0.000764649	0.000965873	0.000885383	0.000241468	4.02447e-05	0.000160979	0.00213297	0.00165003	0.00165003
OTU_11280	k__Bacteria; p__Actinobacteria; c__Actinobacteria; o__Actinomycetales; f__Nocardioidaceae; g__; s__	0.000160979	0.000120734	0.000160979	0.000241468	0.000442692	0.000201223	0.000241468	0.000281713	0.000362202	0.000321958	0.000201223	0.000160979	0.000201223	0.000362202	0.000120734	0.000201223	0.000442692	0.000402447	0.000804894	0.00325982	0.000563426	0.000201223	0.000201223	8.04894e-05	0.00128783	0.000965873	0.00112685	0.00060367	0.000804894	0.00140856	0.000120734	0.000402447	0.000523181	0.000845138	0.000965873	0.000764649	0.000362202	0.000523181	0.000523181	0.000362202	0.000201223	8.04894e-05	0.00201223	0.00068416	0.000241468	0.000362202	0.000362202	0.000241468
OTU_151	k__Bacteria; p__Bacteroidetes; c__Cytophagia; o__Cytophagales; f__Cytophagaceae; g__Flectobacillus; s__	0.000523181	0.000281713	0.000241468	0.000442692	0.000402447	0.000523181	0.000402447	0.00068416	0.00060367	0.00120734	0.0011671	0.00060367	0.000402447	0.000442692	0.000804894	0.000965873	0.000804894	0.000764649	0.000241468	0.000362202	0.000402447	0.00136832	0.00060367	0.000442692	0.000120734	0.000120734	0.000160979	0.000402447	0.000241468	0.000362202	0.000523181	0.000362202	0.000563426	0.000482936	0.000120734	0.000362202	0.000402447	0.000160979	0.000402447	0.000362202	0.00068416	0.00068416	0.000764649	0.000402447	0.000523181	0.000321958	0.000281713	0.000482936
OTU_20068	k__Bacteria; p__Bacteroidetes; c__[Saprospirae]; o__[Saprospirales]; f__Chitinophagaceae; g__; s__	0.00394398	0.00136832	0.00281713	0.000643915	0.000201223	0.000523181	0.000764649	0.000362202	0.000804894	0.00108661	0.000965873	0.00132807	0.000724404	0.000201223	0.000563426	0.000764649	0.000965873	0.000442692	0	0.000201223	4.02447e-05	0.000724404	0.000885383	0.000563426	0.000643915	0.00173052	0.000804894	0.000321958	0.000442692	0.000482936	0.000321958	0.000201223	0.000241468	0.000482936	0.000120734	0.000201223	8.04894e-05	4.02447e-05	8.04894e-05	0.000120734	8.04894e-05	0.000120734	0	0	0	4.02447e-05	0	4.02447e-05
OTU_148	k__Bacteria; p__Planctomycetes; c__Planctomycetia; o__Planctomycetales; f__Planctomycetaceae; g__Planctomyces; s__	0.000523181	0.00060367	0.00060367	0.000160979	0.000120734	0.000120734	4.02447e-05	4.02447e-05	0.000160979	0	0	0	8.04894e-05	0.000120734	0	8.04894e-05	8.04894e-05	8.04894e-05	0	0	8.04894e-05	0	4.02447e-05	8.04894e-05	0	4.02447e-05	8.04894e-05	0.000160979	0	0	0.000160979	8.04894e-05	0	8.04894e-05	0.000120734	8.04894e-05	0.00442692	0.00358178	0.00527205	0.00068416	0.000120734	0.000241468	0.00269639	0.00193175	0.00289762	0.00108661	0.00068416	0.000482936
OTU_10994	k__Bacteria; p__Actinobacteria; c__Actinobacteria; o__Actinomycetales; f__ACK-M1; g__; s__	0.000241468	0.000442692	0.000160979	0.00108661	0.000643915	0.000563426	0.00112685	0.00100612	0.000523181	0.000925628	0.00132807	0.000563426	0.000845138	0	0.000160979	0.000643915	0.000643915	0.000442692	0.000160979	0.000160979	0.000160979	0.000160979	0	8.04894e-05	0	0	8.04894e-05	0.000402447	0.000201223	0.000563426	0.000643915	0.00100612	0.000523181	0.000764649	0.00068416	0.000804894	0.000201223	0.000120734	0.000362202	0.000482936	0.000482936	0.000362202	0.000160979	0.00104636	0.000402447	0.000201223	0.000321958	8.04894e-05
OTU_153	k__Bacteria; p__Proteobacteria; c__Gammaproteobacteria; o__Alteromonadales; f__[Chromatiaceae]; g__Rheinheimera; s__	0.00221346	0.00148905	0.000442692	0.000241468	0.000120734	0	0.000160979	4.02447e-05	0.000120734	0.000845138	0.000563426	0.000845138	0.000321958	0.000643915	0.000845138	4.02447e-05	8.04894e-05	0.000201223	0.000362202	0.000482936	0.000523181	0.000120734	8.04894e-05	0.000120734	0	0.000402447	8.04894e-05	0.00374276	8.04894e-05	0.000160979	0.000241468	0.000201223	0.000201223	0.000724404	0.000201223	0.000643915	0.0015293	0.00169028	0.00205248	0.000160979	0.00068416	0.000563426	0.000563426	0.000442692	0.000442692	0.000241468	0.000362202	0.000281713
OTU_12974	k__Bacteria; p__Cyanobacteria; c__Chloroplast; o__Cryptophyta; f__; g__; s__	0.000885383	0.00060367	0.000804894	0.000764649	0.000201223	0.00124759	0.000523181	0.00060367	0.00060367	0.000402447	4.02447e-05	0.000241468	0.000362202	0.000201223	0.000563426	0.000925628	0.0011671	0.000804894	4.02447e-05	0	4.02447e-05	0.000965873	0.000643915	0.000643915	0	4.02447e-05	8.04894e-05	0.000845138	0.000160979	0.000442692	0.00060367	0.000241468	0.000201223	0.000281713	8.04894e-05	8.04894e-05	0.000281713	0.000643915	0.000442692	0.000482936	0.000885383	0.000643915	0.00165003	0.00104636	0.00201223	0.000321958	0.000925628	0.00068416
OTU_169	k__Bacteria; p__Actinobacteria; c__Actinobacteria; o__Actinomycetales; f__Microbacteriaceae; g__; s__	0.000402447	0.000724404	0.00060367	0.000281713	0.00100612	0.000885383	0.000845138	0.000804894	0.000724404	0.000724404	0.000764649	0.000804894	0.000482936	0.000362202	0.00100612	0.000482936	0.000442692	0.000482936	4.02447e-05	0	8.04894e-05	0.000845138	0.00100612	0.000563426	0.00173052	0.000804894	0.000845138	0.000643915	0.0011671	0.000925628	0.000563426	0.000402447	0.000402447	0.00068416	0.000241468	0.000201223	0.000120734	0.000321958	0.000321958	8.04894e-05	8.04894e-05	4.02447e-05	8.04894e-05	0.000281713	0.000321958	4.02447e-05	8.04894e-05	0.000321958
OTU_4181	k__Bacteria; p__Bacteroidetes; c__Flavobacteriia; o__Flavobacteriales; f__Cryomorphaceae; g__Fluviicola; s__	0.000563426	0.000160979	0.000402447	0.000925628	0.000965873	0.00104636	0.000442692	0.000764649	0.000925628	0.00132807	0.00108661	0.00169028	0.000563426	0.000442692	0.000442692	0.00060367	0.00100612	0.000925628	4.02447e-05	0	0	0.000201223	8.04894e-05	0.000120734	0	4.02447e-05	0	0.000362202	0.000241468	0.000321958	0.000724404	0.000241468	0.000362202	0.000362202	8.04894e-05	0.000402447	0.000281713	0.000120734	0.000201223	0.000643915	0.00120734	0.000120734	0.00156954	0.00128783	0.00140856	0.000563426	0.000362202	0.000362202
OTU_14150	k__Bacteria; p__Proteobacteria; c__Alphaproteobacteria; o__Rhodobacterales; f__Rhodobacteraceae; g__Rhodobacter; s__	0.00068416	0.000563426	0.000643915	0.000482936	0.000724404	0.000482936	0.00060367	0.000442692	0.000402447	4.02447e-05	0	4.02447e-05	0.000442692	0.000120734	0.000321958	0.000241468	0.000321958	0.000362202	8.04894e-05	0.000160979	8.04894e-05	4.02447e-05	8.04894e-05	4.02447e-05	8.04894e-05	4.02447e-05	4.02447e-05	0.000402447	0.000281713	0.000402447	0.000362202	0.000764649	0.000241468	0.000482936	0.000160979	0.000281713	0.00213297	0.00148905	0.00185126	0.000563426	0.000523181	0.000442692	0.00124759	0.00112685	0.00201223	0.00128783	0.00108661	0.000724404
OTU_6892	k__Bacteria; p__Planctomycetes; c__Planctomycetia; o__Gemmatales; f__Gemmataceae; g__; s__	0.000965873	0.00144881	0.00108661	0.00120734	0.00104636	0.00104636	0.000281713	0.000925628	0.00108661	0	0	4.02447e-05	0.000643915	0.00148905	0.000402447	0.00104636	0.00120734	0.00156954	0.000201223	0.000160979	0	8.04894e-05	4.02447e-05	4.02447e-05	4.02447e-05	4.02447e-05	0	0.00068416	0.000804894	0.00136832	0.0011671	0.000885383	0.000724404	0.00132807	0.000281713	0.000885383	0.000402447	0.000523181	0.000523181	4.02447e-05	4.02447e-05	8.04894e-05	0.000442692	0.000120734	0.000241468	4.02447e-05	0	0
OTU_19363	k__Bacteria; p__Bacteroidetes; c__Flavobacteriia; o__Flavobacteriales; f__Flavobacteriaceae; g__Flavobacterium; s__	0	8.04894e-05	8.04894e-05	0.00297811	0.00245493	0.00289762	0.00185126	0.00148905	0.00112685	0	0	0	0.000885383	0.000160979	0.000362202	0.00197199	0.00253542	0.00233419	4.02447e-05	0.000281713	0	0.000120734	0.000160979	0.000201223	0.000281713	0.000120734	4.02447e-05	0.000563426	0.000321958	0.000241468	0.000845138	0.000523181	0.000120734	4.02447e-05	0.000120734	0.000241468	0.000120734	0	4.02447e-05	4.02447e-05	4.02447e-05	0	8.04894e-05	4.02447e-05	0	4.02447e-05	0	4.02447e-05
OTU_20575	k__Bacteria; p__Proteobacteria; c__Betaproteobacteria; o__Burkholderiales; f__Comamonadaceae; g__Polaromonas; s__	4.02447e-05	0.000321958	0.000160979	0.000160979	0.000120734	0.000120734	4.02447e-05	0.000201223	4.02447e-05	0	0	8.04894e-05	0.000321958	0.000120734	0.000241468	0.000160979	8.04894e-05	8.04894e-05	0	0.000160979	8.04894e-05	8.04894e-05	0.000120734	4.02447e-05	8.04894e-05	0	0	0	8.04894e-05	0.000120734	0.000201223	4.02447e-05	8.04894e-05	0.000160979	0.000241468	0.000362202	0.000563426	0.000402447	0.000764649	0.0022537	0.003783	0.00269639	0.0011671	0.00181101	0.00181101	0.00185126	0.00120734	0.00128783
OTU_14028	k__Bacteria; p__Proteobacteria; c__Betaproteobacteria; o__Burkholderiales; f__Comamonadaceae; g__Rubrivivax; s__	0.00132807	0.00120734	0.00156954	0.000724404	0.000442692	0.000523181	0.000764649	0.000764649	0.000845138	0.00253542	0.00249517	0.0018915	0.000523181	0.000160979	0.000281713	0.000321958	0.000643915	0.00060367	0.000241468	0.000442692	0.00068416	0.000201223	0.000160979	0.000643915	0.000362202	0.000201223	0.000201223	0.000321958	0.000523181	0.000120734	0.000321958	0.000241468	0.000362202	0.000643915	0.000482936	0.000201223	0.000402447	0.000482936	0.000241468	0.000120734	0	8.04894e-05	0	8.04894e-05	0	0.000160979	0.000120734	0.000281713
OTU_157	k__Bacteria; p__Proteobacteria; c__Betaproteobacteria	0.000442692	0.000804894	0.000482936	0.000402447	0.000482936	0.000241468	0.000402447	0.000643915	0.000321958	0.000643915	0.000482936	0.000281713	0.000724404	0.000281713	0.00060367	0.000402447	0.000321958	0.000321958	0.000764649	0.00060367	0.00124759	0.000563426	0.000402447	0.000482936	0.000362202	0.000321958	0.000442692	0.000442692	0.000281713	0.000402447	0.000402447	0.000281713	0.000482936	0.000281713	0.000804894	0.000442692	0.000362202	0.000724404	0.00100612	0.000482936	0.000362202	0.000362202	0.000160979	0.000241468	0.000321958	0.000724404	0.000482936	0.000724404
OTU_14405	k__Bacteria; p__Proteobacteria; c__Betaproteobacteria; o__Burkholderiales; f__Comamonadaceae; g__Hydrogenophaga; s__	0.000321958	0.000442692	0.000281713	0.000241468	0.000362202	0.000241468	0.000241468	0.000281713	0.000120734	0.000321958	0.000201223	0.000281713	0.000442692	0.000241468	0.000160979	0.000120734	8.04894e-05	0.000241468	0.000281713	0.00100612	0.000201223	0.000201223	0.000402447	0.000402447	8.04894e-05	0.000241468	8.04894e-05	0	0.000201223	4.02447e-05	0.000321958	0.000241468	0.000241468	0.000241468	0.000281713	0.000281713	0.000241468	0.000321958	0.000482936	0.00156954	0.00136832	0.0015293	0.000402447	0.000845138	0.000482936	0.000804894	0.000764649	0.000925628
OTU_594	k__Bacteria; p__Proteobacteria; c__Alphaproteobacteria; o__Rhodobacterales; f__Rhodobacteraceae; g__Rhodobacter; s__	0.000523181	0.000643915	0.000643915	0.00124759	0.00156954	0.000925628	0.000885383	0.00124759	0.00124759	0.00068416	0.000321958	0.000201223	0.000523181	0.000281713	0.000925628	0.000482936	0.000925628	0.000643915	0.000321958	0.000321958	4.02447e-05	0.000201223	0.000201223	8.04894e-05	0.000321958	0.000804894	0.000563426	0.000482936	0.000482936	0.000201223	0.00060367	0.000442692	0.000201223	0.000241468	0.000442692	0.000724404	0	0.000120734	0.000160979	8.04894e-05	4.02447e-05	8.04894e-05	8.04894e-05	4.02447e-05	4.02447e-05	8.04894e-05	0.000120734	8.04894e-05
OTU_145	k__Bacteria; p__Bacteroidetes; c__Flavobacteriia; o__Flavobacteriales; f__Flavobacteriaceae; g__Flavobacterium; s__	0.000845138	0.00068416	0.000724404	0.000362202	0.000402447	0.000201223	0.000201223	0.000764649	0.000281713	8.04894e-05	0	8.04894e-05	0.000160979	0	0.000120734	0.000201223	0.000442692	0.000442692	8.04894e-05	0.000281713	0.000523181	0.000523181	0.000563426	0.000563426	0.00507083	0.000724404	0.00503059	0.000321958	0.00120734	0.000764649	0.000241468	0.000321958	0.000120734	0.000482936	0.00241468	0.000120734	4.02447e-05	8.04894e-05	4.02447e-05	0	0.000120734	0	0.000160979	4.02447e-05	0	0.000120734	8.04894e-05	0.000201223
OTU_170	k__Bacteria; p__Planctomycetes; c__Planctomycetia; o__Pirellulales; f__Pirellulaceae; g__; s__	0.000442692	0.000362202	0.000241468	0.00173052	0.00201223	0.00165003	0.000523181	0.000724404	0.00120734	4.02447e-05	4.02447e-05	0	0.000845138	0.0015293	0.00136832	0.00100612	0.0018915	0.00273664	0.000160979	0.000241468	4.02447e-05	4.02447e-05	0	0	0.000160979	8.04894e-05	0.000120734	0.00144881	0.0011671	0.00144881	0.000643915	0.000321958	0.000442692	0.000281713	0.000120734	0.000160979	0.000281713	4.02447e-05	0.000201223	0	0	4.02447e-05	0	8.04894e-05	0	8.04894e-05	0	0
OTU_167	k__Bacteria; p__Bacteroidetes; c__Flavobacteriia; o__Flavobacteriales; f__Cryomorphaceae; g__Fluviicola; s__	0.000925628	0.00068416	0.000965873	0.00136832	0.00165003	0.000563426	0.000764649	0.000643915	0.00060367	0.000362202	8.04894e-05	4.02447e-05	0.00060367	0.00060367	0.000724404	0.0015293	0.00104636	0.000804894	0	0	0	0.000362202	0.000724404	0.000563426	0.000201223	0	4.02447e-05	0.000321958	0.000724404	0.000965873	0.000442692	0.000563426	0.000563426	0.000482936	0.000241468	0.000643915	0.000321958	0.000120734	0.000120734	0.000563426	0.000442692	0.00108661	0.000241468	0.000281713	0.000321958	0.000201223	0.000241468	0.000281713
OTU_11041	k__Bacteria; p__Bacteroidetes; c__Cytophagia; o__Cytophagales; f__Cyclobacteriaceae; g__; s__	0.000160979	0.000120734	8.04894e-05	0.000241468	0.000281713	0.000362202	0.000120734	0.000523181	0.000563426	0.00193175	0.0015293	0.00209272	0.000845138	0.000120734	0.000482936	0.000643915	0.0011671	0.000643915	0.000120734	0.00060367	4.02447e-05	0.000241468	0.000321958	0	8.04894e-05	4.02447e-05	4.02447e-05	0.000442692	0.00060367	0.000402447	0.000482936	0.00060367	0.00100612	0.000482936	0.000442692	0.000362202	0.000321958	0.000281713	0.000160979	0.000643915	0.0011671	0.000925628	0.00060367	0.000643915	0.000402447	0.000281713	0.000201223	0.000281713
OTU_130	k__Bacteria; p__Gemmatimonadetes; c__Gemmatimonadetes; o__Gemmatimonadales; f__Gemmatimonadaceae; g__Gemmatimonas; s__	0.00112685	0.000160979	0.000482936	0.000241468	0.000120734	0.000120734	0.000804894	0.000885383	0.000523181	0	4.02447e-05	4.02447e-05	0.000523181	0.000362202	0.000523181	0.000523181	0.00060367	0.000885383	0	0.000120734	0.000120734	0.000120734	0.000120734	0.000120734	0.000160979	0.000201223	0.000201223	0.000402447	0.000523181	0.000362202	0.000764649	0.000321958	0.000241468	0.00112685	0.00068416	0.000482936	0.00229395	0.00249517	0.0015293	0.000241468	0.000241468	0.000281713	0.000845138	0.000845138	0.00100612	0.000241468	8.04894e-05	4.02447e-05
OTU_134	k__Bacteria; p__Actinobacteria; c__Actinobacteria; o__Actinomycetales; f__Microbacteriaceae; g__Clavibacter; s__	0.000120734	0.000201223	8.04894e-05	0	8.04894e-05	8.04894e-05	0	8.04894e-05	0	0.000885383	0.0015293	0.00112685	0.000321958	0.000241468	0.000241468	0.000120734	0.000120734	0.000120734	0	8.04894e-05	8.04894e-05	0.0022537	0.00249517	0.00160979	0.00245493	0.00201223	0.00160979	0.000120734	0.000160979	4.02447e-05	4.02447e-05	8.04894e-05	8.04894e-05	0	8.04894e-05	8.04894e-05	4.02447e-05	0	0	0	4.02447e-05	4.02447e-05	4.02447e-05	8.04894e-05	8.04894e-05	0.000241468	8.04894e-05	0.000160979
OTU_113	k__Bacteria; p__Cyanobacteria; c__Synechococcophycideae; o__Synechococcales; f__Synechococcaceae; g__Synechococcus; s__	0.00394398	0.0026159	0.00350129	0.000724404	0.000482936	0.000724404	0.000724404	0.000925628	0.00165003	0	0	0.000120734	0.000201223	0.000643915	0.000523181	0.000925628	0.00144881	0.000804894	8.04894e-05	4.02447e-05	4.02447e-05	4.02447e-05	4.02447e-05	8.04894e-05	4.02447e-05	4.02447e-05	0	0.000804894	0.000442692	0.000563426	0.000442692	0.000120734	0.000362202	0.000482936	0.000160979	0.000362202	0.000241468	0.000201223	0.000120734	4.02447e-05	8.04894e-05	0	0	4.02447e-05	0.000120734	0	0	4.02447e-05
OTU_11370	k__Bacteria; p__Cyanobacteria; c__Synechococcophycideae; o__Synechococcales; f__Synechococcaceae; g__Synechococcus; s__	0.00132807	0.00128783	0.000925628	0.000120734	0.000523181	0.000321958	0.000160979	0.000241468	0.000321958	0.000281713	0.000201223	0.000563426	0.000160979	0.000241468	0.000321958	0.000241468	0.000482936	0.000442692	4.02447e-05	8.04894e-05	0	0.000482936	0.00060367	0	8.04894e-05	0	0	0.000201223	0.000241468	0.000241468	0.000120734	0.000120734	0.000362202	0.00068416	0.000281713	0.000523181	0.00237444	0.00209272	0.00209272	0.00160979	0.00104636	0.00060367	0.00104636	0.000523181	0.000523181	0.000120734	4.02447e-05	8.04894e-05
OTU_5651	k__Bacteria; p__Verrucomicrobia; c__Opitutae; o__[Cerasicoccales]; f__[Cerasicoccaceae]; g__; s__	0.000281713	0.000120734	0.000120734	0	4.02447e-05	0.000160979	0.000160979	0.000201223	8.04894e-05	0	0	4.02447e-05	4.02447e-05	4.02447e-05	4.02447e-05	0.000160979	0.000442692	8.04894e-05	0	4.02447e-05	0	0.000845138	0.000724404	0.000764649	0	0	4.02447e-05	8.04894e-05	4.02447e-05	0	0.000120734	4.02447e-05	4.02447e-05	0.000281713	0.000402447	0.000362202	8.04894e-05	8.04894e-05	8.04894e-05	8.04894e-05	8.04894e-05	0.000160979	8.04894e-05	4.02447e-05	0.000241468	0.000120734	0.000120734	4.02447e-05
OTU_168	k__Bacteria; p__Actinobacteria; c__Actinobacteria; o__Actinomycetales; f__; g__; s__	0.000724404	0.000724404	0.00060367	0.000402447	0.00156954	0.00144881	0.000724404	0.00068416	0.00181101	4.02447e-05	4.02447e-05	0	0.000362202	0.000925628	0.000523181	0.000764649	0.000804894	0.000965873	0.00120734	0.00205248	0.000402447	0.000201223	0.000281713	0.000201223	8.04894e-05	8.04894e-05	0.000241468	0.000442692	0.00112685	0.000563426	0.000523181	0.000321958	0.000160979	0.000442692	0.000241468	0.000281713	8.04894e-05	0.000321958	0.000120734	0	8.04894e-05	0	0.000402447	0.000402447	0.000724404	8.04894e-05	0.000241468	8.04894e-05
OTU_6758	k__Bacteria; p__Proteobacteria; c__Alphaproteobacteria; o__Sphingomonadales; f__; g__; s__	0.000482936	0.000845138	0.000845138	0.00068416	0.000160979	0.000804894	0.000482936	0.000362202	0.000965873	0.000201223	0.000241468	0.000321958	0.000482936	0.000362202	0.000563426	0.000482936	0.000724404	0.000724404	0.00136832	0.00148905	0.00124759	0.000523181	0.000885383	0.000442692	0.00060367	0	0.000724404	0.00068416	0.000523181	0.000362202	0.000643915	0.000845138	0.00104636	0.000523181	0.000764649	0.000281713	4.02447e-05	0.000120734	4.02447e-05	4.02447e-05	0.000402447	4.02447e-05	4.02447e-05	0	4.02447e-05	0.000120734	0.000160979	4.02447e-05
OTU_165	k__Bacteria; p__Chloroflexi; c__Ktedonobacteria; o__TK10; f__; g__; s__	0.00233419	0.00140856	0.00338055	0.000523181	0.000120734	0.00108661	0.000523181	0.00112685	0.00301835	0	0	0	0.000281713	0.000402447	0.000482936	0.000402447	0.00120734	0.00104636	0	0.000160979	0	0.00060367	0.00132807	0.000643915	4.02447e-05	0	4.02447e-05	0.00060367	0.00068416	0.000523181	0.000643915	0.000281713	0.000402447	0.000442692	0.000201223	0.000362202	0.000120734	4.02447e-05	0.000120734	0	0	4.02447e-05	0	0	0	4.02447e-05	0	0
OTU_155	k__Bacteria; p__Bacteroidetes; c__Sphingobacteriia; o__Sphingobacteriales; f__Sphingobacteriaceae; g__; s__	0.00120734	0.000925628	0.000764649	0.000281713	0.000120734	0.000281713	0.000402447	0.000482936	0.000724404	0	8.04894e-05	0	0.000201223	0.000402447	0.000281713	0.000804894	0.000804894	0.000402447	0	0.000160979	4.02447e-05	0.00060367	0.000362202	0.000120734	0.000201223	0.000160979	0.000120734	0.000402447	0.000482936	0.000724404	0.000523181	0.000523181	0.000804894	0.000523181	0.000241468	0.000885383	0.000402447	0.000442692	0.00060367	8.04894e-05	0.000201223	0	0.000281713	0.000764649	0.000563426	0.000160979	0.000120734	0.000241468
OTU_12782	k__Bacteria; p__Cyanobacteria; c__Chloroplast; o__Stramenopiles; f__; g__; s__	0.00221346	0.000241468	0.000965873	0.000442692	0.000241468	0.00060367	0.00124759	0.000925628	0.000724404	8.04894e-05	4.02447e-05	0.000120734	0.000281713	0	0.000281713	0.00144881	0.00112685	0.00112685	0	4.02447e-05	0	0	4.02447e-05	0.000120734	0	0	4.02447e-05	0.000845138	0.00060367	0.000160979	0.000965873	0.00132807	0.0011671	0.000845138	0.00124759	0.00132807	0.000120734	0.000120734	0.000281713	0.000643915	0.000925628	0.000965873	0.000523181	4.02447e-05	8.04894e-05	0	0	8.04894e-05
OTU_15290	k__Bacteria; p__Proteobacteria; c__Betaproteobacteria; o__Burkholderiales; f__Comamonadaceae; g__Limnohabitans; s__	0.00068416	0.000845138	0.00068416	0.000885383	0.000925628	0.000764649	0.00104636	0.00136832	0.00112685	4.02447e-05	4.02447e-05	4.02447e-05	0.0011671	0.00068416	0.000885383	0.000482936	0.00060367	0.00068416	0.000160979	8.04894e-05	0.000281713	4.02447e-05	8.04894e-05	0.000321958	0	0	8.04894e-05	0.000643915	0.000563426	0.000321958	0.000764649	0.000563426	0.000643915	0.000724404	0.00060367	0.000402447	0.000321958	0.000362202	0.000160979	0.000523181	0.000402447	0.000724404	0.000160979	0.000321958	0.00060367	0.000281713	0.000442692	8.04894e-05
OTU_12758	k__Bacteria; p__Actinobacteria; c__Acidimicrobiia; o__Acidimicrobiales; f__C111; g__; s__	8.04894e-05	0	8.04894e-05	0	0.000160979	0	8.04894e-05	4.02447e-05	4.02447e-05	0	4.02447e-05	4.02447e-05	4.02447e-05	4.02447e-05	8.04894e-05	4.02447e-05	4.02447e-05	0	4.02447e-05	0.000160979	0	0.000120734	0.000201223	0	0	0	0	0	4.02447e-05	0	4.02447e-05	0	4.02447e-05	0.000281713	0.000120734	8.04894e-05	0.00277688	0.00265615	0.00136832	0.000885383	0.00104636	0.00068416	0.00366227	0.00277688	0.00185126	0.000643915	0.00197199	0.000321958
OTU_19675	k__Bacteria; p__Bacteroidetes; c__[Saprospirae]; o__[Saprospirales]; f__Saprospiraceae; g__Aquirestis; s__calciphila	0.000885383	0.00060367	0.000724404	0.000482936	0.00100612	0.000563426	0.000563426	0.000201223	0.000925628	0.00201223	0.000804894	0.00241468	0.000442692	0.000402447	0.000402447	8.04894e-05	0.000402447	0.000764649	0	0.000160979	4.02447e-05	8.04894e-05	0.000160979	8.04894e-05	0.0011671	0.000764649	0.00060367	0.000281713	0.000563426	0.000160979	0.000402447	8.04894e-05	0.000764649	0.000201223	0.000160979	0.000321958	0.00132807	0.000442692	0.000724404	0.000201223	0.000321958	0.000120734	0.000321958	0.000362202	0.000563426	4.02447e-05	0	0.000120734
OTU_164	k__Bacteria; p__Proteobacteria; c__Gammaproteobacteria; o__Methylococcales; f__Crenotrichaceae; g__Crenothrix; s__	0.00156954	0.00136832	0.00181101	0.000482936	0.000925628	0.000804894	0.000241468	0.00100612	0.00128783	4.02447e-05	0	4.02447e-05	0.000321958	0.000402447	0.000563426	0.000402447	0.000563426	0.000925628	4.02447e-05	0.000160979	8.04894e-05	0.000563426	0.00144881	0.000965873	0	4.02447e-05	0.000120734	0.000201223	0.000201223	0.000362202	0.000201223	8.04894e-05	0.000160979	0.000201223	8.04894e-05	0.000321958	0.00140856	0.00112685	0.00148905	4.02447e-05	8.04894e-05	0	0.000482936	0.000402447	0.00060367	0.000120734	8.04894e-05	0.000160979
OTU_10569	k__Bacteria; p__Proteobacteria; c__Betaproteobacteria; o__Burkholderiales; f__Comamonadaceae	0.000845138	0.000724404	0.000885383	0.00060367	0.000482936	0.00060367	0.00124759	0.000965873	0.000764649	0.000120734	8.04894e-05	8.04894e-05	0.000925628	0.000201223	0.000804894	0.000482936	0.000804894	0.000965873	4.02447e-05	0.000120734	0.000120734	0.000201223	0.000120734	0.000321958	8.04894e-05	0	4.02447e-05	0.000563426	0.000362202	0.000442692	0.000845138	0.000523181	0.000724404	0.000482936	0.000845138	0.000523181	0.000281713	0.000241468	0.000402447	0.000321958	0.000241468	0.000201223	0.000120734	0.000241468	0.000241468	0.000160979	0.000241468	0.000321958
OTU_5113	k__Bacteria; p__Actinobacteria; c__Actinobacteria; o__Actinomycetales; f__ACK-M1; g__; s__	0.000201223	0.000643915	0.000442692	0.00100612	0.000643915	0.00100612	0.00120734	0.000965873	0.000442692	0.000120734	8.04894e-05	4.02447e-05	0.000724404	0.000201223	0.000724404	0.000804894	0.000563426	0.000804894	4.02447e-05	0.000160979	0.000160979	0	4.02447e-05	4.02447e-05	0.000120734	0	4.02447e-05	0.000321958	0.000362202	0.000643915	0.000724404	0.00100612	0.000965873	0.00104636	0.000643915	0.0011671	0.000201223	8.04894e-05	8.04894e-05	0.000201223	0.000402447	0.000321958	0.000201223	0.000563426	0.000321958	4.02447e-05	0.000160979	0.000201223
OTU_14302	k__Bacteria; p__Proteobacteria; c__Betaproteobacteria; o__Burkholderiales; f__Comamonadaceae; g__Limnohabitans; s__	0.00068416	0.00100612	0.000724404	0.000402447	0.000482936	0.000482936	0.000442692	0.000764649	0.000402447	0.000201223	0.000160979	0.000362202	0.00100612	0.000281713	0.000643915	0.000321958	0.00060367	0.000764649	8.04894e-05	0.000160979	0.000442692	0.000523181	0.000482936	0.000281713	8.04894e-05	0.000160979	0.000120734	0.000442692	0.000241468	8.04894e-05	0.000523181	0.00060367	0.000281713	0.000281713	0.000402447	0.000523181	0.000120734	4.02447e-05	0.000321958	0.000523181	0.000925628	0.000563426	0.000241468	0.000241468	0.000321958	0.000563426	0.000362202	0.000362202
OTU_20451	k__Bacteria; p__Proteobacteria; c__Betaproteobacteria; o__Burkholderiales; f__Comamonadaceae	0.000563426	0.000845138	0.000885383	0.000120734	0.000120734	8.04894e-05	4.02447e-05	4.02447e-05	8.04894e-05	0.00104636	0.00068416	0.00068416	0.000563426	0.000241468	0.000442692	0.000160979	0.000120734	0.000201223	0.000321958	0.00068416	0.000402447	0.00112685	0.00108661	0.00136832	0.000362202	0.000402447	0.000482936	0.000523181	0.000120734	0.000120734	0.000241468	0.000160979	0.000563426	0.000120734	8.04894e-05	8.04894e-05	0.000160979	0.000160979	0.000321958	0.000563426	0.00068416	0.000563426	0.000120734	0	0.000120734	0.00108661	0.0011671	0.00068416
OTU_12683	k__Bacteria; p__Proteobacteria; c__Alphaproteobacteria; o__Sphingomonadales; f__Sphingomonadaceae; g__Novosphingobium; s__	0.000362202	0.000321958	8.04894e-05	0.000241468	0.000482936	0.000402447	8.04894e-05	4.02447e-05	0.000201223	0.000362202	0.000201223	0.000281713	0.000482936	0.000804894	0.000321958	4.02447e-05	0.000201223	0.000160979	0.00112685	0.000442692	0.000523181	0.00221346	0.00257566	0.00165003	0.0011671	0.000845138	0.00060367	0.000241468	0.000160979	0.000201223	0.000482936	0.000160979	0.00165003	0.000402447	0.000281713	0.000482936	0.000321958	0.000442692	0.000362202	8.04894e-05	4.02447e-05	0.000160979	0.000201223	4.02447e-05	8.04894e-05	0.000281713	0.000120734	0.000120734
OTU_3293	k__Bacteria; p__Bacteroidetes; c__Flavobacteriia; o__Flavobacteriales; f__Flavobacteriaceae; g__Flavobacterium; s__frigidarium	0.000442692	0.000201223	0.000160979	0.000563426	0.000201223	0.000442692	0.000241468	0.000201223	0.000321958	0.00160979	0.000643915	0.00108661	4.02447e-05	0.000160979	0.000201223	0.000523181	0.00060367	0.000563426	8.04894e-05	0.000201223	0.000362202	0.00169028	0.00205248	0.0011671	0.000804894	0.000321958	0.000523181	0.000241468	0.000321958	0.000241468	0.000482936	0.000362202	8.04894e-05	0.000120734	0.000201223	0.000362202	0.000160979	4.02447e-05	0.000120734	0.000281713	0.000402447	0.000120734	0.000160979	0.000160979	0.000241468	0.000120734	0.000321958	0.000281713
OTU_19073	k__Bacteria; p__Actinobacteria; c__Actinobacteria; o__Actinomycetales; f__ACK-M1; g__; s__	0.000442692	0.000482936	0.000362202	0.000482936	0.000281713	0.000160979	0.000523181	0.000643915	0.000321958	0.000160979	8.04894e-05	4.02447e-05	0.000362202	0.000321958	0.000241468	0.000643915	0.000281713	0.000160979	0.000120734	4.02447e-05	4.02447e-05	0.000120734	0	0	0.000160979	4.02447e-05	8.04894e-05	0.000281713	0.000160979	0.000442692	0.000523181	0.000965873	0.000362202	0.00060367	0.000643915	0.000643915	0.000362202	0.000281713	0.000362202	0.000402447	0.000321958	0.000482936	0.000241468	0.000764649	0.000321958	0.000120734	0.000482936	8.04894e-05
OTU_20071	k__Bacteria; p__Bacteroidetes; c__Flavobacteriia; o__Flavobacteriales; f__Cryomorphaceae; g__Fluviicola; s__	0.000925628	0.00060367	0.000804894	0.000845138	0.000402447	0.000402447	0.000724404	0.000482936	0.000321958	4.02447e-05	0	4.02447e-05	0.000321958	0.000281713	0.000523181	0.000804894	0.000724404	0.000724404	4.02447e-05	4.02447e-05	0	0.000201223	4.02447e-05	8.04894e-05	0	0	4.02447e-05	0.000201223	0.000362202	0.000482936	0.00060367	0.00068416	0.000643915	0.000402447	0.000160979	0.000201223	0.000201223	0	0.000241468	0.000241468	0.000563426	0.000120734	0.00205248	0.00185126	0.00165003	0.000362202	0.000362202	0.000764649
OTU_13	k__Bacteria; p__Bacteroidetes; c__Flavobacteriia; o__Flavobacteriales; f__Cryomorphaceae; g__Fluviicola; s__	0.000362202	8.04894e-05	0.000120734	0.000442692	0.000160979	0.000402447	0.000442692	0.000764649	0.000281713	0.000120734	4.02447e-05	0.000241468	0.000362202	0.000362202	0.000281713	0.000885383	0.000442692	0.00068416	0.000120734	8.04894e-05	0	0.000523181	0.000201223	0.000402447	4.02447e-05	8.04894e-05	4.02447e-05	0.000321958	0.000523181	0.000321958	0.000321958	0.000402447	0.000482936	0.000321958	0.000321958	0.000523181	0.000321958	0.000160979	0.000160979	0.000845138	0.000925628	0.000643915	0.0011671	0.000925628	0.00108661	0.00100612	0.000724404	0.00060367
OTU_158	k__Bacteria; p__Verrucomicrobia; c__Verrucomicrobiae; o__Verrucomicrobiales; f__Verrucomicrobiaceae; g__Luteolibacter; s__	4.02447e-05	0.000201223	8.04894e-05	0.00201223	0.00293786	0.0022537	0.000201223	0.000523181	0.0015293	4.02447e-05	0	0	0.000885383	0.00173052	0.00120734	0.000321958	0.00100612	0.00104636	0.000160979	0	0	0.000120734	0.000160979	0	0.000321958	0.000160979	0.000362202	0.00060367	0.000442692	0.00104636	0.000241468	8.04894e-05	0.000241468	0.000120734	8.04894e-05	8.04894e-05	0.000201223	0.000201223	0.000201223	0.000160979	0.000241468	0.000120734	0.000241468	4.02447e-05	0.000281713	0	4.02447e-05	4.02447e-05
OTU_1749	k__Bacteria; p__Bacteroidetes; c__Flavobacteriia; o__Flavobacteriales; f__Flavobacteriaceae; g__Flavobacterium; s__succinicans	0.000241468	4.02447e-05	0.000160979	4.02447e-05	8.04894e-05	8.04894e-05	0	8.04894e-05	8.04894e-05	0	8.04894e-05	0	0.000160979	0	4.02447e-05	0.000120734	0.000160979	0	0	0	4.02447e-05	0.000201223	0.000362202	0.000201223	8.04894e-05	0	0	8.04894e-05	0	0	0.000160979	0	0	8.04894e-05	8.04894e-05	4.02447e-05	0.00124759	0.000764649	0.000845138	0.000201223	0.000160979	0.000120734	0.00523181	0.0034208	0.00555377	0.000402447	0.000523181	0.000724404
OTU_178	k__Bacteria; p__Proteobacteria; c__Betaproteobacteria; o__Nitrosomonadales; f__Nitrosomonadaceae; g__; s__	0.00104636	0.000724404	0.000482936	0.000402447	0.000724404	0.000442692	0.000321958	0.000362202	0.000241468	0	0	0	0.000160979	0.000201223	0.000160979	0.000442692	0.000281713	0.000201223	4.02447e-05	0.000241468	0.000120734	8.04894e-05	0.000201223	0.000120734	0	4.02447e-05	4.02447e-05	0.000160979	0.000160979	8.04894e-05	0.000201223	0.000160979	4.02447e-05	0.000362202	0	0.000281713	0.00185126	0.00249517	0.00237444	0.000281713	0.00068416	0.000523181	0.00104636	0.00136832	0.00120734	0.000281713	0.000321958	0.000201223
OTU_9685	k__Bacteria; p__Bacteroidetes; c__Flavobacteriia; o__Flavobacteriales; f__Flavobacteriaceae; g__Flavobacterium; s__	0.000201223	0.000402447	0.000362202	0.000643915	0.000482936	0.00068416	0.00100612	0.000845138	0.000724404	0	0	0	0.000482936	0.000442692	0.000442692	0.000643915	0.00108661	0.000764649	0.000201223	0.000362202	0.000523181	0.000804894	0.00060367	0.000643915	0.000362202	4.02447e-05	0.000523181	0.000442692	0.000482936	0.000321958	0.000442692	0.000724404	0.000321958	0.000402447	0.000442692	0.000362202	0.000201223	0	4.02447e-05	0.000321958	0.000482936	0.000160979	0.000804894	0.000362202	0.000523181	0.000362202	0.000321958	0.000241468
OTU_186	k__Bacteria; p__Proteobacteria; c__Gammaproteobacteria; o__Xanthomonadales; f__Sinobacteraceae; g__; s__	0	0.000281713	8.04894e-05	0.000120734	0.000201223	0.000201223	4.02447e-05	0.000120734	0.000201223	4.02447e-05	0.000120734	0.000120734	4.02447e-05	0.000241468	8.04894e-05	8.04894e-05	0.000160979	0.000442692	8.04894e-05	0.000160979	0.000120734	0.000201223	0.000120734	0	0.00370251	0.00309884	0.00442692	0.00068416	0.00140856	0.00104636	4.02447e-05	0.000281713	0.000160979	8.04894e-05	0.000523181	0.000120734	4.02447e-05	0.000482936	0.000201223	4.02447e-05	0	4.02447e-05	4.02447e-05	4.02447e-05	0	0	0	0
OTU_20447	k__Bacteria; p__Proteobacteria; c__Betaproteobacteria; o__Burkholderiales; f__Comamonadaceae	0.000482936	0.000321958	0.000160979	0.000321958	0.000402447	0.000120734	4.02447e-05	0.000120734	0.000160979	0.000643915	0.000523181	0.00068416	0.000482936	0.000201223	0.000321958	0.000201223	0.000201223	0.000241468	0.000563426	0.00181101	0.000563426	0.000804894	0.00100612	0.000724404	0.000160979	0.000402447	0.000241468	0.000362202	0.000402447	0.000201223	0.000160979	0.000160979	0.000321958	0.000402447	0.000523181	0	0.000120734	0.000201223	0.000241468	0.00068416	0.000523181	0.000643915	0.000281713	0.000120734	4.02447e-05	0.000402447	0.00193175	0.000321958
OTU_13165	k__Bacteria; p__Proteobacteria; c__Alphaproteobacteria; o__Sphingomonadales; f__; g__; s__	0.000160979	8.04894e-05	0.000160979	0.000362202	0.00068416	0.000442692	0.000160979	0.000241468	0.000281713	4.02447e-05	4.02447e-05	4.02447e-05	0.000321958	0.000321958	0.000160979	0.000160979	0.000321958	0.000321958	0.00273664	0.00229395	0.000925628	0.000281713	0	0.000201223	0.00112685	0.0034208	0.00112685	0.000321958	0.000764649	0.00060367	0.000120734	0.000402447	0.000120734	0.000281713	0.000643915	4.02447e-05	8.04894e-05	0.000160979	0.000321958	4.02447e-05	4.02447e-05	4.02447e-05	0.000120734	4.02447e-05	0.000160979	0	4.02447e-05	0.000362202
OTU_171	k__Bacteria; p__Cyanobacteria; c__Chloroplast; o__Chlorophyta; f__; g__; s__	0.00100612	0.00100612	0.00148905	0.000160979	0.000241468	0.000241468	0.000160979	0.000201223	0.000643915	0.000241468	0	0.000120734	0.000120734	0.000241468	0.000241468	0.00060367	0.000523181	0.000563426	0.000362202	0.000362202	8.04894e-05	0.000845138	0.00104636	0.000643915	0.00100612	0.000321958	0.000804894	0.000321958	0.000362202	0.000241468	0.000643915	0.000241468	0.000362202	0.000281713	0.000120734	0.000241468	0.000442692	0.000482936	0.000201223	0.000523181	0.000764649	0.00068416	0.00108661	0.000281713	0.000321958	8.04894e-05	8.04894e-05	0.000120734
OTU_11251	k__Bacteria; p__Actinobacteria; c__Actinobacteria; o__Actinomycetales; f__ACK-M1; g__; s__	0.000241468	0.000643915	0.000201223	0.000563426	0.000523181	0.00068416	0.00108661	0.00108661	0.000281713	0.000241468	0.000201223	0.000160979	0.000563426	0.000321958	0.000643915	0.000925628	0.000281713	0.000442692	4.02447e-05	0.000160979	0	8.04894e-05	0.000160979	0	4.02447e-05	4.02447e-05	4.02447e-05	0.000523181	0.000362202	0.000160979	0.000804894	0.000845138	0.000643915	0.000402447	0.000885383	0.00104636	0.000362202	0.000160979	8.04894e-05	0.000402447	0.000362202	0.000281713	4.02447e-05	0.000442692	0.000482936	0.000201223	0.000201223	0.000160979
OTU_176	k__Bacteria; p__Proteobacteria; c__Alphaproteobacteria; o__Rhizobiales; f__; g__; s__	0.000482936	0.000241468	0.000160979	0.00120734	0.00201223	0.00104636	0.000764649	0.000563426	0.00112685	4.02447e-05	4.02447e-05	0	0.00104636	0.000845138	0.00068416	0.000925628	0.000563426	0.000804894	8.04894e-05	0	0	4.02447e-05	0	0.000281713	4.02447e-05	0	0	0.000845138	0.00060367	0.00100612	0.000925628	0.000160979	0.000724404	0.000442692	0.000281713	0.000804894	0.000362202	0.000241468	0.000241468	4.02447e-05	0	8.04894e-05	0.000241468	0.000160979	0.000160979	0.000160979	4.02447e-05	0
OTU_14986	k__Bacteria; p__Proteobacteria; c__Betaproteobacteria; o__Burkholderiales; f__Comamonadaceae	0.000321958	0.000321958	0.000643915	0.000160979	8.04894e-05	4.02447e-05	0.000120734	8.04894e-05	4.02447e-05	0.000281713	0.000160979	0.000281713	0.000241468	0.000241468	0.000120734	4.02447e-05	4.02447e-05	4.02447e-05	0.00201223	0.000925628	0.00358178	0.000241468	0.000241468	0.000201223	0.000201223	0.000643915	0.000120734	0.000241468	0.000845138	0.000362202	0.000120734	0.000201223	0.000120734	0.000120734	0.000523181	8.04894e-05	0.000160979	8.04894e-05	0.000281713	0.000160979	0.000281713	0.000402447	0.000120734	4.02447e-05	8.04894e-05	0.00140856	0.00108661	0.00104636
OTU_419	k__Bacteria; p__Bacteroidetes; c__Flavobacteriia; o__Flavobacteriales; f__Flavobacteriaceae; g__Flavobacterium; s__	0.000281713	0.000120734	0.000241468	0.00100612	0.000724404	0.000643915	0.000402447	0.00112685	0.00068416	0	4.02447e-05	4.02447e-05	0.000362202	8.04894e-05	0.000201223	0.00108661	0.00108661	0.000925628	4.02447e-05	4.02447e-05	0	0.000724404	0.000845138	0.000804894	0.000925628	0.000321958	0.000643915	0.000281713	0.00068416	0.000764649	0.000362202	0.000362202	0.000281713	0.000120734	0.000281713	0.000120734	0.000201223	0.000201223	0.000201223	0.000120734	8.04894e-05	0	0	0	0.000120734	0	0	0
OTU_20650	k__Bacteria; p__Proteobacteria; c__Betaproteobacteria; o__Burkholderiales; f__Comamonadaceae; g__Comamonas; s__	0.000281713	0.000643915	0.00060367	0.000281713	0.000442692	0.000201223	0.000120734	0.000241468	4.02447e-05	0.000402447	0.000442692	0.000402447	0.000643915	0.00112685	0.000724404	0	8.04894e-05	0.000160979	0.00229395	0.000845138	0.00321958	0.000160979	0.000321958	0.000241468	0.000201223	0.000160979	8.04894e-05	0.000402447	0.00068416	0.000201223	0.000281713	0.000160979	8.04894e-05	0.000321958	0.000281713	0.000120734	0.000120734	8.04894e-05	0.000402447	0.000160979	0.000321958	0.000241468	0.000201223	4.02447e-05	8.04894e-05	0.000724404	0.000482936	0.000563426
OTU_12680	k__Bacteria; p__Proteobacteria; c__Alphaproteobacteria; o__Rhizobiales; f__Rhizobiaceae	0.000321958	0.000482936	0.000160979	0.000160979	0.000442692	0.000160979	0.000120734	0.000241468	0.000241468	0.000362202	0.000281713	0.000160979	0.000160979	0.000442692	0.000402447	0.000201223	0.000362202	0.000120734	0.00201223	0.00068416	0.00140856	0.000281713	0.000281713	0.000321958	0.00068416	0.00108661	0.00060367	0.000201223	0.000442692	0.000523181	0.000201223	0.000201223	0.000241468	0.000201223	0.000442692	0.000402447	0.000281713	0.000201223	0.000160979	0.000241468	0.000241468	0.000281713	0.000321958	0.000201223	0.000160979	0.000321958	0.000402447	0.00197199
OTU_1891	k__Bacteria; p__Proteobacteria; c__Betaproteobacteria; o__Burkholderiales; f__Oxalobacteraceae; g__; s__	0.000120734	0.000201223	0.000120734	0.000201223	0	0.000160979	0.000241468	4.02447e-05	0.000201223	0.000281713	0.000281713	0.000281713	0.000120734	0.000362202	0.000241468	0.000201223	0.000160979	0.000281713	4.02447e-05	0.000201223	0.000120734	0.000321958	0.000201223	0.000281713	0.000402447	0.000482936	0.000402447	0.000241468	0.000201223	8.04894e-05	0.000160979	0.000241468	0.000201223	0.000201223	8.04894e-05	0.000160979	0.000482936	0.000563426	0.00060367	0.00060367	0.00068416	0.000482936	0.000523181	0.000845138	0.000764649	0.000523181	0.000241468	0.000321958
OTU_15307	k__Bacteria; p__Proteobacteria; c__Betaproteobacteria; o__Burkholderiales; f__Comamonadaceae; g__Methylibium; s__	8.04894e-05	0.000201223	0.000402447	0	0.000321958	0.000321958	0.000241468	0.000120734	4.02447e-05	0.000241468	0.000120734	0.000120734	0.000201223	0.000321958	0.000201223	0.000160979	0.000160979	0.000362202	0.000120734	0.000321958	0.000120734	0.000362202	0.000402447	0.000523181	8.04894e-05	0.000160979	0.000120734	0.000643915	0.000281713	0.000201223	0.000120734	0.000160979	0.000321958	0.000241468	0.000845138	0.000362202	0.00209272	0.00124759	0.000201223	0.000764649	0.000201223	0.000523181	0.000120734	0.0018915	4.02447e-05	0.00253542	0.000120734	0.000362202
OTU_172	k__Bacteria; p__Proteobacteria; c__Alphaproteobacteria; o__Caulobacterales; f__Caulobacteraceae; g__Mycoplana; s__	0.000160979	0.000120734	4.02447e-05	0.000281713	0.000482936	0.000201223	0.000402447	0.000281713	0.000321958	0.000160979	0.000201223	0.000241468	0.000160979	0.000402447	8.04894e-05	0.000120734	0.000482936	0.000281713	0.00124759	0.0015293	0.00104636	0.000442692	0.000321958	0.000362202	0.00241468	0.0018915	0.00140856	0.000402447	0.000402447	0.00068416	0.000402447	0.000241468	0.000241468	0.000402447	0.000482936	0.000321958	0.000201223	0.000321958	0.000482936	0.000120734	0	0.000201223	0.000281713	0.000201223	0	0.000120734	0.000201223	4.02447e-05
OTU_10312	k__Bacteria; p__Proteobacteria; c__Gammaproteobacteria; o__Alteromonadales; f__125ds10; g__; s__	0.000281713	0	0.000402447	0.000281713	0.000281713	0.000201223	0.000281713	0.000764649	0.000321958	0.000362202	0.000201223	0.000241468	0.000281713	8.04894e-05	0.000120734	0.000362202	0.00068416	0.000402447	0	0	4.02447e-05	0.000120734	0.000321958	0.000160979	4.02447e-05	0.000160979	0.000201223	0.000160979	0.000120734	0.000201223	0.000965873	0.000845138	0.000523181	0.000523181	0.000885383	0.000362202	0.00237444	0.00201223	0.00217321	0.000241468	0.000241468	0.000362202	0.000241468	0.000402447	0.000321958	0.000120734	4.02447e-05	0.000120734
OTU_12149	k__Bacteria; p__Verrucomicrobia; c__Opitutae; o__[Cerasicoccales]; f__[Cerasicoccaceae]; g__; s__	0.00068416	0.000241468	0.000402447	0.000362202	0.000442692	0.000523181	0.000643915	0.000523181	0.000482936	0.00112685	0.00160979	0.00169028	0.000362202	0.000160979	0.000482936	0.000724404	0.00068416	0.00068416	0	4.02447e-05	0	8.04894e-05	0	0.000201223	0	8.04894e-05	0	0.00060367	0.000201223	0.000160979	0.000563426	0.000845138	0.000402447	0.000201223	0.000321958	8.04894e-05	0.000321958	0.000201223	0.000241468	0.000160979	0.000120734	8.04894e-05	0.000160979	8.04894e-05	0.000201223	4.02447e-05	4.02447e-05	4.02447e-05
OTU_19130	k__Bacteria; p__Actinobacteria; c__Actinobacteria; o__Actinomycetales; f__ACK-M1; g__; s__	0.000160979	0.000442692	0.000482936	0.000804894	0.000362202	0.000523181	0.000804894	0.000563426	0.000643915	4.02447e-05	8.04894e-05	0	0.000724404	0.000362202	0.000442692	0.000845138	0.000523181	0.000563426	0.000120734	0.000160979	0.000120734	8.04894e-05	0.000120734	8.04894e-05	0	4.02447e-05	0	0.000523181	0.000362202	0.000321958	0.00068416	0.00112685	0.000442692	0.000482936	0.000764649	0.000804894	0.000321958	0.00060367	0.000482936	8.04894e-05	0.000281713	0.000160979	0.000160979	0.000643915	0.000442692	0.000201223	0.000241468	0.000160979
OTU_183	k__Bacteria; p__Proteobacteria; c__Alphaproteobacteria; o__Caulobacterales; f__Caulobacteraceae; g__Arthrospira; s__	0.000201223	0.000201223	0.000160979	0.000241468	0.000281713	8.04894e-05	0.000321958	8.04894e-05	0.000160979	4.02447e-05	0	4.02447e-05	8.04894e-05	0.000241468	0.000120734	0.000120734	0.000120734	8.04894e-05	0.0015293	0.0034208	0.00144881	0.000281713	0.000321958	0.000362202	0.000724404	0.00285737	0.000925628	0.000120734	0.000442692	0.000402447	0.000321958	0.000201223	0.000241468	0.000442692	0.000563426	0.000362202	0.000442692	0.000482936	0.000362202	8.04894e-05	0.000281713	8.04894e-05	0.000160979	0	4.02447e-05	0.000241468	0.000120734	0.000241468
OTU_265	k__Bacteria; p__Actinobacteria; c__Actinobacteria; o__Actinomycetales; f__; g__; s__	0.000402447	0.0011671	0.000764649	0.000281713	0.000362202	0.000281713	0.000321958	0.000201223	0.000442692	0.000281713	8.04894e-05	8.04894e-05	0.000442692	0.000321958	0.000201223	0.000321958	0.000764649	0.000442692	0.000160979	0.000160979	0	0.000563426	0.000764649	0.000523181	0.0015293	0.00112685	0.000885383	0.000362202	0.00124759	0.000563426	0.000563426	0.000482936	0.000160979	0.000281713	0.000321958	0.000201223	0.000120734	0.000120734	8.04894e-05	4.02447e-05	0	0.000160979	0.000160979	4.02447e-05	0	4.02447e-05	4.02447e-05	8.04894e-05
OTU_139	k__Bacteria; p__Proteobacteria; c__Gammaproteobacteria; o__Alteromonadales; f__125ds10; g__; s__	0.000482936	0.000160979	0.000160979	0.000402447	0.000120734	0.000201223	0.000482936	0.000804894	0.000321958	0	0.000120734	0.000241468	0.000201223	4.02447e-05	0.000241468	0.000523181	0.000563426	0.000281713	0	4.02447e-05	4.02447e-05	8.04894e-05	4.02447e-05	0.000120734	0	0	0	8.04894e-05	4.02447e-05	0.000120734	0.000764649	0.000764649	0.000321958	0.000563426	0.000482936	0.000563426	0.0034208	0.00249517	0.00265615	0.000160979	0.000241468	0.000321958	0.000563426	0.000442692	0.000402447	8.04894e-05	0.000120734	4.02447e-05
OTU_19655	k__Bacteria; p__Bacteroidetes; c__Cytophagia; o__Cytophagales; f__Cytophagaceae; g__; s__	0.000120734	0.000241468	0.000402447	0.000241468	0.000120734	0.000201223	0.000201223	0.000201223	0.000241468	0.000482936	0.000160979	0.00060367	0.000643915	8.04894e-05	0.000281713	0.000321958	0.000201223	0.000201223	0	4.02447e-05	4.02447e-05	0.00132807	0.00136832	0.00068416	8.04894e-05	0.000160979	4.02447e-05	0.000241468	0.000120734	0.000160979	0.000362202	8.04894e-05	0.000241468	0.000120734	0.000160979	0.000362202	0	4.02447e-05	0	8.04894e-05	0	4.02447e-05	4.02447e-05	0	4.02447e-05	0.000160979	8.04894e-05	0
OTU_147	k__Bacteria; p__Cyanobacteria; c__Chloroplast; o__Stramenopiles; f__; g__; s__	4.02447e-05	0	0	0.00144881	0.000965873	0.000965873	0.000643915	0.000643915	0.000724404	0.00068416	0.000442692	0.000523181	0.000482936	0.000362202	0.000321958	0.000724404	0.000965873	0.000724404	0	8.04894e-05	0	0.000160979	4.02447e-05	4.02447e-05	4.02447e-05	0	0	0.000482936	0.000160979	8.04894e-05	0.000442692	0.000643915	0.000523181	0.00213297	0.00120734	0.00241468	0.000281713	0.000201223	0.000201223	0	0	0	0.000120734	4.02447e-05	0.000120734	0	0	0
OTU_18006	k__Bacteria; p__Proteobacteria; c__Betaproteobacteria; o__Methylophilales; f__Methylophilaceae; g__Methylotenera; s__mobilis	0.000160979	0.000160979	8.04894e-05	0	0.000120734	0.000160979	8.04894e-05	0.000402447	0.000321958	4.02447e-05	0.000120734	4.02447e-05	0.000160979	4.02447e-05	0.000120734	8.04894e-05	0.000241468	4.02447e-05	4.02447e-05	0	0	0.000523181	0.000321958	0.000482936	0.000120734	0.000201223	8.04894e-05	0.000120734	4.02447e-05	8.04894e-05	8.04894e-05	4.02447e-05	8.04894e-05	8.04894e-05	8.04894e-05	0	4.02447e-05	8.04894e-05	0	0	0	4.02447e-05	0	8.04894e-05	8.04894e-05	4.02447e-05	0	4.02447e-05
OTU_1959	k__Bacteria; p__Bacteroidetes; c__[Saprospirae]; o__[Saprospirales]; f__Chitinophagaceae; g__; s__	0.00173052	0.00148905	0.00245493	0.000482936	0.000482936	0.000362202	0.000442692	0.000442692	0.000402447	0.00100612	0.000321958	0.00112685	8.04894e-05	0.000160979	0.000442692	0.000321958	0.000482936	0.000563426	4.02447e-05	8.04894e-05	0	0.000643915	0.000845138	0.00060367	0.000442692	0.00112685	0.00104636	8.04894e-05	0.000281713	0.000201223	0.000201223	0.000120734	0.000201223	0.000120734	0.000321958	0.000160979	4.02447e-05	0	0	0.000201223	0	0	8.04894e-05	0	0	0	8.04894e-05	0
OTU_718	k__Bacteria; p__Proteobacteria; c__Betaproteobacteria; o__Rhodocyclales; f__Rhodocyclaceae; g__Dechloromonas; s__	8.04894e-05	0.000201223	0.000201223	0.000442692	0.00068416	0.000160979	0.000160979	0.000120734	8.04894e-05	0.000160979	0.000201223	8.04894e-05	0.000120734	0.000321958	0.000201223	0.000120734	0.000241468	0.000402447	8.04894e-05	4.02447e-05	0	0.00068416	0.00068416	0.000281713	0.00265615	0.00221346	0.00253542	0.000523181	0.00132807	0.000482936	0.000120734	0.000201223	0.000120734	0.000362202	0.000281713	8.04894e-05	0.000120734	8.04894e-05	0.000362202	8.04894e-05	4.02447e-05	0	0.000120734	4.02447e-05	0	0.000160979	0.000281713	0.000241468
OTU_8946	k__Bacteria; p__Actinobacteria; c__Acidimicrobiia; o__Acidimicrobiales; f__C111; g__; s__	8.04894e-05	0.000201223	0.000281713	0.000120734	4.02447e-05	4.02447e-05	0.000120734	8.04894e-05	0.000201223	0	0	0	0	8.04894e-05	0	4.02447e-05	0	0	0	0.000120734	4.02447e-05	0	0	0	0	0	0	8.04894e-05	0.000120734	0	8.04894e-05	8.04894e-05	0.000160979	0.000241468	4.02447e-05	0	0.000885383	0.00060367	0.00112685	0.00060367	0.000845138	0.00185126	0.00148905	0.00148905	0.00197199	0.000402447	0.00233419	0.000724404
OTU_15093	k__Bacteria; p__Proteobacteria; c__Betaproteobacteria; o__Burkholderiales; f__Comamonadaceae	0.00289762	0.00181101	0.00213297	0.000724404	0.000482936	0.000523181	0.00128783	0.000845138	0.000764649	4.02447e-05	0.000160979	0.000160979	0.000925628	0.000321958	0.00104636	0.000442692	0.000482936	0.000281713	4.02447e-05	0.000120734	4.02447e-05	0.000160979	0.000321958	0.000281713	4.02447e-05	0.000120734	4.02447e-05	0.000321958	0.000321958	0.000160979	0.000281713	0.000120734	0.000442692	0.000281713	0.000241468	0.000201223	0	8.04894e-05	8.04894e-05	8.04894e-05	8.04894e-05	4.02447e-05	0	8.04894e-05	0	0	0	8.04894e-05
OTU_203	k__Bacteria; p__Proteobacteria; c__Gammaproteobacteria; o__Xanthomonadales; f__Xanthomonadaceae; g__; s__	0.000160979	0.000201223	0.000160979	4.02447e-05	0.000160979	0.000120734	0.000120734	0.000160979	0.000241468	0.000965873	0.000362202	0.000523181	0.00060367	0.000925628	0.000724404	0.000120734	0.000241468	0.000321958	0.00148905	0.00148905	0.000764649	0.000362202	0.000402447	0.000482936	0.000362202	0.000764649	0.000442692	0.000321958	0.000563426	0.000804894	0.000281713	0.000120734	4.02447e-05	0.00068416	0.000523181	0.00104636	0.000120734	0.000402447	0.000160979	0.000201223	8.04894e-05	0.000201223	0.000201223	4.02447e-05	8.04894e-05	0.000362202	0.000120734	4.02447e-05
OTU_1428	k__Bacteria; p__Proteobacteria; c__Gammaproteobacteria; o__Xanthomonadales; f__Xanthomonadaceae; g__Lysobacter; s__brunescens	0.000281713	0.000201223	0.000241468	0.000321958	0.000523181	4.02447e-05	0.000281713	0.000160979	0.000402447	8.04894e-05	4.02447e-05	8.04894e-05	0.000321958	0.000482936	0.000160979	0.000281713	0.000402447	0.000402447	0.00197199	0.00124759	0.000885383	0.000160979	0.000281713	8.04894e-05	0.00104636	0.00136832	0.000764649	0.000523181	0.000764649	0.000965873	0.000201223	0.000241468	0	0.000442692	0.0015293	0.000281713	0.000201223	8.04894e-05	0.000482936	0	8.04894e-05	0.000120734	0.000160979	0.000120734	0	8.04894e-05	8.04894e-05	0.000120734
OTU_19548	k__Bacteria; p__Bacteroidetes; c__Flavobacteriia; o__Flavobacteriales; f__Cryomorphaceae; g__; s__	0.000160979	0.000523181	0.000160979	0.0011671	0.00100612	0.0015293	0.000764649	0.00124759	0.00132807	0.000120734	0	8.04894e-05	0.000643915	0.000885383	0.000724404	0.000804894	0.00104636	0.00160979	0	0.000160979	4.02447e-05	0.000281713	0.000402447	0.000281713	4.02447e-05	4.02447e-05	0	0.000402447	0.000241468	0.000241468	0.000442692	0.000201223	8.04894e-05	0	0.000120734	8.04894e-05	4.02447e-05	4.02447e-05	0	0.000120734	0.000160979	0.000201223	0.000442692	0.000241468	0.000482936	0.000523181	0.000160979	0.000160979
OTU_19681	k__Bacteria; p__Bacteroidetes; c__Flavobacteriia; o__Flavobacteriales; f__Cryomorphaceae; g__Fluviicola; s__	8.04894e-05	0	0	4.02447e-05	4.02447e-05	4.02447e-05	4.02447e-05	0	0	0	0	0	4.02447e-05	4.02447e-05	4.02447e-05	0	4.02447e-05	0.000160979	0	8.04894e-05	8.04894e-05	0.00160979	0.0018915	0.0022537	4.02447e-05	0	4.02447e-05	4.02447e-05	0	0.000241468	4.02447e-05	0.000241468	4.02447e-05	0.000160979	8.04894e-05	8.04894e-05	0	0	4.02447e-05	0.000362202	0.000523181	0.000523181	0.000724404	0.000643915	0.00160979	0.000845138	0.000402447	0.00100612
OTU_191	k__Bacteria; p__Proteobacteria; c__Alphaproteobacteria; o__Sphingomonadales; f__Sphingomonadaceae; g__; s__	0.000201223	0.000241468	0.000120734	8.04894e-05	0.000362202	4.02447e-05	4.02447e-05	8.04894e-05	0.000120734	0	4.02447e-05	4.02447e-05	0	0.000281713	0.000201223	0.000120734	0.000160979	0.000160979	0.000764649	0.0011671	0.000643915	0	4.02447e-05	0.000120734	0.00108661	0.00277688	0.000724404	0.000241468	0.000201223	0.000120734	4.02447e-05	8.04894e-05	0.000321958	0.000442692	0.00100612	0	0.000281713	0.00068416	0.000281713	4.02447e-05	0.0015293	0.000281713	0.000442692	4.02447e-05	0	0.000563426	0.00173052	0.00104636
OTU_195	k__Bacteria; p__Proteobacteria; c__Deltaproteobacteria; o__Spirobacillales; f__; g__; s__	0	4.02447e-05	0	0.00068416	0.00104636	0.00120734	0.000362202	0.000241468	0.000965873	0	0	4.02447e-05	0.000201223	0.000925628	0.000442692	0.000241468	0.000362202	0.000563426	4.02447e-05	0	4.02447e-05	0	0	4.02447e-05	0	0	0	0.000402447	0.000804894	0.00124759	0.000563426	0.000281713	0.0011671	0.00128783	0.000523181	0.00132807	0.000523181	0.00068416	0.000482936	4.02447e-05	8.04894e-05	0.000241468	0.000885383	0.000482936	0.000482936	0.000120734	8.04894e-05	8.04894e-05
OTU_4051	k__Bacteria; p__Proteobacteria; c__Gammaproteobacteria; o__Xanthomonadales; f__Sinobacteraceae; g__; s__	0.000402447	0.000402447	0.000442692	0.000201223	0.000120734	4.02447e-05	0.000120734	8.04894e-05	0.000241468	4.02447e-05	4.02447e-05	0	0.000321958	0.000160979	4.02447e-05	0.000160979	0.000241468	0.000201223	0.000160979	0.000120734	4.02447e-05	0	0	4.02447e-05	0	0	0	8.04894e-05	8.04894e-05	0.000241468	0.000362202	0.000281713	0.000321958	0.000241468	0.000563426	0.000362202	0.000804894	0.000925628	0.0011671	0.00112685	0.000442692	0.00108661	0.00112685	0.00112685	0.00169028	0.000321958	0.000362202	0.000442692
OTU_12450	k__Bacteria; p__Proteobacteria; c__Alphaproteobacteria; o__Sphingomonadales; f__Sphingomonadaceae; g__Novosphingobium; s__	0.000845138	0.000442692	0.000321958	0.000241468	0.000442692	0.000321958	0.000241468	0	0.000362202	0.000201223	4.02447e-05	0	0.000362202	0.000482936	0.000523181	0.000201223	0.000241468	0.000241468	0.000442692	0.000160979	0.000120734	0.00132807	0.000845138	0.00060367	0.00100612	0.000402447	0.00112685	0.000362202	0.00060367	0.000281713	4.02447e-05	0.000321958	0.000643915	0.000120734	8.04894e-05	0.000201223	0.000321958	0.000442692	0.000321958	8.04894e-05	8.04894e-05	8.04894e-05	0.000482936	0.000321958	0.000523181	0.000321958	0.000120734	0.000160979
OTU_210	k__Bacteria; p__Actinobacteria; c__Actinobacteria; o__Actinomycetales; f__; g__; s__	0.000160979	0.000120734	8.04894e-05	0.000160979	0.000442692	0.000120734	0.000120734	0.000160979	0.000201223	8.04894e-05	8.04894e-05	0	0.000160979	4.02447e-05	8.04894e-05	8.04894e-05	0.000160979	0.000442692	4.02447e-05	0.000201223	4.02447e-05	0.000281713	0.000120734	0.000120734	0.00289762	0.00281713	0.00426594	0.000281713	0.00108661	0.000764649	0.000160979	8.04894e-05	4.02447e-05	0.000201223	0.000241468	0.000120734	0.000120734	0.000201223	0.000201223	8.04894e-05	8.04894e-05	0.000201223	0.000241468	0.000120734	4.02447e-05	8.04894e-05	0.000120734	0.000120734
OTU_13095	k__Bacteria; p__Chloroflexi; c__SL56; o__; f__; g__; s__	0	0.000120734	0.000160979	0.000201223	0.000281713	0.000281713	0.000241468	0.000241468	0.000402447	0	0	0	0.000402447	4.02447e-05	0.000201223	0.000160979	0.000241468	0.000160979	8.04894e-05	0.000120734	0	4.02447e-05	8.04894e-05	4.02447e-05	0	0	0	0.000362202	0.000120734	8.04894e-05	0.000402447	0.000281713	0.000201223	0.000201223	0.000321958	0.000523181	0.000925628	0.000925628	0.00140856	0.000563426	0.000201223	0.000281713	0.00132807	0.00165003	0.0018915	0.000321958	0.000120734	0.000241468
OTU_212	k__Bacteria; p__Proteobacteria; c__Gammaproteobacteria; o__Xanthomonadales; f__Xanthomonadaceae; g__; s__	8.04894e-05	0.000160979	0	8.04894e-05	4.02447e-05	8.04894e-05	4.02447e-05	0	0	4.02447e-05	8.04894e-05	8.04894e-05	0	0	0.000160979	0.000160979	0.000160979	0.000201223	0.00281713	0.00446716	0.00213297	0	4.02447e-05	8.04894e-05	0.000201223	0.00237444	8.04894e-05	4.02447e-05	0.000160979	0.000120734	4.02447e-05	0.000160979	4.02447e-05	0.000120734	0.00386349	4.02447e-05	0	8.04894e-05	0.000120734	0	0	0	0.000160979	0	4.02447e-05	0	0	0.000201223
OTU_14310	k__Bacteria; p__Proteobacteria; c__Betaproteobacteria; o__Burkholderiales; f__Comamonadaceae	0.000563426	0.000845138	0.000442692	0.000241468	0.000241468	0.000120734	0	4.02447e-05	4.02447e-05	0.000402447	0.000563426	0.000402447	0.00060367	0.000201223	0.000241468	4.02447e-05	8.04894e-05	0.000120734	0.000442692	0.000321958	0.000241468	0.000845138	0.000724404	0.00120734	0.000120734	0.000563426	0.000201223	8.04894e-05	0.000281713	0.000362202	0.000160979	0.000442692	0.000321958	8.04894e-05	8.04894e-05	0.000281713	8.04894e-05	0.000120734	0.000160979	0.000362202	0.000563426	0.000563426	0.000120734	0.000120734	8.04894e-05	0.00068416	0.00112685	0.000362202
OTU_11727	k__Bacteria; p__Actinobacteria; c__Actinobacteria; o__Actinomycetales; f__Nocardioidaceae; g__Nocardioides; s__furvisabuli	8.04894e-05	0	8.04894e-05	0.000120734	0.000120734	8.04894e-05	4.02447e-05	0.000120734	0.000160979	0.000120734	0	4.02447e-05	0.000160979	0.000321958	0.000120734	0	0.000241468	0.000321958	0.000281713	0.000321958	0.000201223	8.04894e-05	8.04894e-05	0.000120734	0.00213297	0.00181101	0.0015293	0.000402447	0.00104636	0.000281713	8.04894e-05	0.000201223	0.000201223	0.000724404	0.000160979	0.000442692	0.00060367	0.0011671	0.000643915	0.000362202	0.000120734	0.000120734	0.00132807	0.000321958	0.000201223	0.000281713	0.000120734	8.04894e-05
OTU_10418	k__Bacteria; p__Proteobacteria; c__Betaproteobacteria; o__Burkholderiales; f__Comamonadaceae; g__Rhodoferax; s__	0.000442692	0.000321958	0.000201223	0.000281713	0.000201223	0.000321958	0.000281713	4.02447e-05	4.02447e-05	0.000281713	0.000241468	0.000120734	0.000201223	0.000201223	0.000362202	4.02447e-05	0.000321958	8.04894e-05	0.000402447	0.000241468	0.000160979	0.000201223	0.000281713	0.000201223	0.000764649	8.04894e-05	0.000563426	0.000201223	0.000201223	0.000160979	0.000160979	0.000241468	0.000241468	0.000120734	0	0	0	0.000160979	0.000160979	0.00128783	0.00160979	0.00140856	0.0011671	0.000442692	0.000885383	0.000804894	0.00136832	0.000764649
OTU_20279	k__Bacteria; p__Bacteroidetes; c__Cytophagia; o__Cytophagales; f__Cyclobacteriaceae; g__; s__	0.000482936	0.000281713	0.000442692	0.000321958	0.000241468	0.000362202	0.000321958	0.000402447	0.000402447	0.000402447	0.00068416	0.000563426	0.000362202	0	0.000402447	0.000523181	0.000764649	0.000482936	0	4.02447e-05	4.02447e-05	0.000201223	8.04894e-05	4.02447e-05	4.02447e-05	4.02447e-05	4.02447e-05	0.000281713	0.000201223	0.000201223	0.000362202	0.00060367	0.000724404	0.000362202	0.000362202	0.000241468	0.000160979	0.000321958	0.000160979	0.000845138	0.0011671	0.000724404	0.000160979	0.000362202	0.000201223	0.000160979	0.000241468	0.000482936
OTU_19113	k__Bacteria; p__Actinobacteria; c__Actinobacteria; o__Actinomycetales; f__ACK-M1; g__; s__	0.000281713	0.000160979	0.000523181	0.000321958	0.000442692	0.000321958	0.000362202	0.000724404	0.000563426	0	4.02447e-05	0	0.000442692	0.000160979	0.00104636	0.000925628	0.000241468	0.000201223	8.04894e-05	0.000201223	8.04894e-05	4.02447e-05	4.02447e-05	4.02447e-05	0	8.04894e-05	4.02447e-05	0.000321958	0.000321958	0.000724404	0.000885383	0.000724404	0.000281713	0.000482936	0.000442692	0.00100612	0.000362202	0.000281713	0.000241468	0.000281713	0.000201223	0.000482936	0.000160979	0.000523181	0.000442692	0.000160979	0.000321958	0.000120734
OTU_196	k__Bacteria; p__Proteobacteria; c__Alphaproteobacteria; o__Rhizobiales; f__; g__; s__	0.00104636	0.00132807	0.00144881	0.000241468	0.000402447	0.000281713	0.000160979	0.000201223	0.000442692	0.000362202	0.000362202	0.000563426	0.000120734	0.000362202	0.000321958	0.000160979	0.000160979	0.000160979	0.00124759	0.00104636	0.000362202	0.000160979	0.000160979	8.04894e-05	0.000482936	0.000241468	0.000764649	4.02447e-05	0.000281713	0.000241468	0.000120734	0.000160979	0.000241468	0.000160979	0.000120734	8.04894e-05	4.02447e-05	4.02447e-05	4.02447e-05	0	0	0	4.02447e-05	0	4.02447e-05	0	4.02447e-05	4.02447e-05
OTU_205	k__Bacteria; p__Actinobacteria; c__Acidimicrobiia; o__Acidimicrobiales; f__C111; g__; s__	0.000563426	0.000563426	0.00132807	0.000442692	0.000523181	0.000563426	0.000482936	0.000724404	0.00104636	0	0	0	0.000241468	0.00068416	0.000643915	0.000402447	0.000764649	0.000925628	0.000201223	0.000281713	0.000201223	0.000321958	0.000523181	0.000321958	0	0	0	0.000241468	0.000523181	0.000965873	0.000321958	0.000281713	0.000201223	0.000885383	0.000442692	0.000563426	4.02447e-05	0	8.04894e-05	4.02447e-05	0	0	8.04894e-05	4.02447e-05	0	0	8.04894e-05	0
OTU_12317	k__Bacteria; p__Proteobacteria; c__Alphaproteobacteria; o__Sphingomonadales; f__; g__; s__	8.04894e-05	0.000442692	8.04894e-05	0.00068416	0.0015293	0.000563426	4.02447e-05	0.000120734	0.00068416	0	0	0	0.000321958	0.000643915	0.000241468	0.000201223	0.000241468	0.000402447	0.000925628	0.000482936	0.000120734	0.000201223	8.04894e-05	0.000120734	0.00233419	0.0018915	0.00229395	0.000160979	0.00100612	0.000643915	0.000160979	0.000241468	0.000120734	0.000160979	0.000201223	4.02447e-05	0.000120734	0.000160979	0.000241468	0	0	0.000201223	0	4.02447e-05	0	0.000120734	8.04894e-05	4.02447e-05
OTU_8060	k__Bacteria; p__Proteobacteria; c__Alphaproteobacteria; o__Rhodobacterales; f__Rhodobacteraceae; g__Rhodobacter; s__	0.000523181	0.000563426	0.000482936	0.000201223	0.000241468	0.000281713	0.000201223	0.000241468	0.000241468	0.000120734	8.04894e-05	8.04894e-05	0.000241468	0	0.000281713	0.000120734	0.000201223	0.000402447	0.000362202	0.000724404	0.000160979	0.00185126	0.00132807	0.00128783	0.000804894	0.000321958	0.000925628	0.000402447	0.00068416	0.000241468	0.000362202	0.000160979	0.000442692	0.000402447	0.000281713	0.000201223	0.000120734	8.04894e-05	8.04894e-05	4.02447e-05	4.02447e-05	0	8.04894e-05	0.000160979	0.000160979	0.00060367	0.000321958	0.000160979
OTU_13488	k__Bacteria; p__Proteobacteria; c__Betaproteobacteria; o__Methylophilales; f__Methylophilaceae; g__Methylotenera; s__mobilis	0.000160979	0	0.000201223	0.000120734	8.04894e-05	8.04894e-05	0.000281713	0.000160979	8.04894e-05	4.02447e-05	0.000120734	0.000241468	8.04894e-05	8.04894e-05	0	4.02447e-05	4.02447e-05	0.000120734	8.04894e-05	4.02447e-05	4.02447e-05	0.000160979	0.000321958	0.000482936	0.000120734	0	0.000120734	4.02447e-05	0.000120734	4.02447e-05	0	0	0	0.000120734	0.000120734	4.02447e-05	8.04894e-05	8.04894e-05	0.000160979	0.000201223	0.000160979	0	0	0	8.04894e-05	4.02447e-05	4.02447e-05	0.000120734
OTU_15	k__Bacteria; p__Proteobacteria; c__Alphaproteobacteria; o__Rhodobacterales; f__Rhodobacteraceae; g__Rhodobacter; s__	0.000281713	0.000281713	0.000321958	0.000201223	0.000241468	0.000241468	4.02447e-05	8.04894e-05	0.000120734	0.000845138	0.000442692	0.000764649	0.000241468	0.000281713	0.000201223	0.000120734	0.000120734	0.000321958	0.00108661	0.00156954	0.000643915	0.000643915	0.000442692	0.000281713	0.000442692	0.000321958	0.000160979	8.04894e-05	0.000201223	0.000120734	0.000160979	0.000120734	0.00104636	0.000120734	0.000120734	4.02447e-05	0.000160979	0.000160979	0.000241468	0.00060367	0.000482936	0.000523181	0.000201223	0.000362202	0.000523181	0.000845138	0.000523181	0.000201223
OTU_18243	k__Bacteria; p__Proteobacteria; c__Gammaproteobacteria; o__Xanthomonadales; f__Xanthomonadaceae; g__; s__	8.04894e-05	0.000482936	0.000160979	0.00060367	0.0015293	0.000764649	0.000241468	0.000402447	0.00068416	0.000120734	0	4.02447e-05	0.000201223	0.000160979	0.000201223	0.000402447	0.000362202	0.000804894	0.000120734	0.000120734	0.000120734	0.000402447	0.000321958	0.000321958	0.000563426	0.000402447	0.000925628	0.000764649	0.00108661	0.000885383	0.000402447	0.000201223	4.02447e-05	0.000281713	0.000643915	0.000120734	8.04894e-05	0.000120734	0.000281713	0	4.02447e-05	0	8.04894e-05	4.02447e-05	0	0.000160979	4.02447e-05	4.02447e-05
OTU_13227	k__Bacteria; p__Verrucomicrobia; c__Opitutae; o__Opitutales; f__Opitutaceae; g__Opitutus; s__	0.000281713	0.000241468	0.000482936	8.04894e-05	8.04894e-05	0	0.000362202	0.000201223	0.000321958	0	0	4.02447e-05	0.000120734	0	0.000160979	0.000402447	0.000241468	0.000321958	4.02447e-05	0.000201223	4.02447e-05	8.04894e-05	8.04894e-05	0.000120734	0	8.04894e-05	4.02447e-05	0.000201223	0.000201223	0.000120734	0.000120734	0.000201223	0.000160979	0.000804894	0.000523181	0.000362202	0.00136832	0.00112685	0.00100612	0.000201223	0.000281713	0.000281713	0.00112685	0.00100612	0.0018915	0.000201223	0.000442692	0.000643915
OTU_492	k__Bacteria; p__Proteobacteria; c__Alphaproteobacteria; o__Rhodobacterales; f__Rhodobacteraceae; g__Rhodobacter; s__	0.000241468	0.000523181	0.000241468	0.00104636	0.00120734	0.000885383	0.000120734	0.000241468	0.000563426	0.000120734	0	8.04894e-05	0.000160979	0.000482936	0.000362202	0.000362202	0.000563426	0.000442692	0.000281713	0.000523181	8.04894e-05	0.000281713	0.000362202	0.000120734	0.0011671	0.000764649	0.00140856	0.000523181	0.00108661	0.00112685	0.000201223	0.000321958	8.04894e-05	8.04894e-05	0.000281713	8.04894e-05	0.000241468	0.000160979	0.000402447	8.04894e-05	0.000160979	0	8.04894e-05	4.02447e-05	4.02447e-05	4.02447e-05	4.02447e-05	0
OTU_241	k__Bacteria; p__Proteobacteria; c__Alphaproteobacteria; o__Rhizobiales	0.000482936	0.000442692	0.000201223	0.000201223	0.000563426	0.000281713	0.000281713	4.02447e-05	0.000362202	0.000201223	0.000201223	0.000241468	0.000362202	0.000281713	0.000321958	0.000321958	0.000362202	0.000241468	0.00060367	0.000201223	0.000321958	0.000442692	0.000321958	0.000362202	0.000845138	0.00112685	0.000965873	0.000201223	0.000321958	0.000362202	0.000321958	0.000321958	0.000321958	0.000321958	0.000362202	8.04894e-05	0.000201223	0.000362202	0.000201223	0.000281713	0.000321958	0.000321958	0.000201223	0.000281713	0.000321958	0.000241468	0.000120734	0.000845138
OTU_175	k__Bacteria; p__Proteobacteria; c__Alphaproteobacteria; o__Sphingomonadales; f__; g__; s__	0.00169028	0.00177077	0.00132807	0.000482936	0.000362202	0.00060367	8.04894e-05	0.000120734	0.000965873	4.02447e-05	4.02447e-05	0.000160979	0.000402447	0.00112685	0.000845138	8.04894e-05	0.000281713	0.000321958	0.00185126	0.000160979	0.00060367	8.04894e-05	8.04894e-05	4.02447e-05	0.000482936	0.000160979	0.000241468	0.000281713	0.000402447	0.000442692	0.000160979	0.000321958	4.02447e-05	0.000241468	0.000281713	8.04894e-05	0.000201223	4.02447e-05	0.000160979	0.000160979	8.04894e-05	4.02447e-05	4.02447e-05	0.000120734	0	0.000201223	0.000120734	0
OTU_208	k__Bacteria; p__Chloroflexi; c__Anaerolineae; o__H39; f__; g__; s__	0.0018915	0.0011671	0.000965873	0.000523181	0.000321958	0.000845138	0.000362202	0.000724404	0.0011671	0	0	0	0.000563426	0.000281713	0.000321958	0.000362202	0.00060367	0.000482936	4.02447e-05	8.04894e-05	0	8.04894e-05	0	4.02447e-05	4.02447e-05	0	0	0.000362202	0.000160979	0.000241468	0.000885383	0.000281713	0.000160979	0.000241468	4.02447e-05	0.000241468	0.000804894	0.000845138	0.000804894	8.04894e-05	0	4.02447e-05	0.000442692	0.000563426	0.000563426	0.000120734	0	8.04894e-05
OTU_251	k__Bacteria; p__Actinobacteria; c__Actinobacteria; o__Actinomycetales; f__Sporichthyaceae; g__; s__	0.000160979	8.04894e-05	0.000160979	0.000120734	0.000120734	0.000201223	0.000201223	8.04894e-05	4.02447e-05	0.000281713	0.000160979	8.04894e-05	0.000120734	0.000402447	0.000120734	0.000160979	8.04894e-05	0.000160979	0.000442692	0.000523181	0	4.02447e-05	0.000362202	0.000120734	0.00100612	0.000885383	0.00060367	0.000563426	0.000845138	0.000442692	0.000120734	0.000241468	0.000120734	0.000804894	0.00140856	0.000281713	0.000321958	0.000563426	0.000160979	0.000120734	0.000120734	0.000281713	0.00136832	0.000845138	0.000241468	0.000563426	8.04894e-05	0.000281713
OTU_193	k__Bacteria; p__Cyanobacteria; c__Chloroplast; o__Chlorophyta; f__Chlamydomonadaceae; g__; s__	0.000241468	0.000362202	0.000281713	8.04894e-05	0.000120734	4.02447e-05	0.000120734	8.04894e-05	0.000321958	0	0	4.02447e-05	8.04894e-05	4.02447e-05	0.000120734	0.000362202	0.000321958	0.000160979	0	0	4.02447e-05	8.04894e-05	0	0	0	0	0	0.000160979	0	0.000120734	0.000281713	4.02447e-05	0.000160979	0.000563426	0.000160979	0.000120734	0.000885383	0.00068416	0.00165003	0.00104636	0.000442692	0.000241468	0.00515132	0.000724404	0.000804894	0.000442692	0.000442692	0.000482936
OTU_11373	k__Bacteria; p__Actinobacteria; c__Actinobacteria; o__Actinomycetales; f__Micrococcaceae; g__Arthrobacter; s__	0	0.000201223	0.000120734	0.000120734	4.02447e-05	4.02447e-05	8.04894e-05	0.000160979	0.000120734	0	0.000160979	0.000120734	4.02447e-05	0.000120734	0.000201223	0.000120734	0	0.000160979	0.000120734	8.04894e-05	8.04894e-05	0.000120734	0.000120734	4.02447e-05	0.00527205	0.0015293	0.00539279	0.000523181	0.000523181	0.000120734	0	8.04894e-05	0.000160979	4.02447e-05	8.04894e-05	0.000120734	0.000241468	8.04894e-05	0	8.04894e-05	0	8.04894e-05	0.000201223	4.02447e-05	4.02447e-05	8.04894e-05	8.04894e-05	0.000160979
OTU_202	k__Bacteria; p__Cyanobacteria; c__Synechococcophycideae; o__Synechococcales; f__Chamaesiphonaceae; g__; s__	0.000160979	0.000321958	0.000201223	0.000442692	0.000442692	0.000201223	4.02447e-05	8.04894e-05	0.000362202	0	4.02447e-05	8.04894e-05	0	0.000160979	0.000120734	0.000241468	0.000362202	0.00120734	0	0.000201223	0	0.00112685	0.00144881	0.00237444	0.000442692	0.000160979	0.00156954	0.000482936	0.000482936	0.000724404	0.000120734	0.000201223	0.000120734	8.04894e-05	4.02447e-05	4.02447e-05	0.000160979	0	8.04894e-05	4.02447e-05	0.000120734	8.04894e-05	0.0022537	0.000160979	4.02447e-05	4.02447e-05	4.02447e-05	0.000120734
OTU_17751	k__Bacteria; p__Cyanobacteria; c__Chloroplast; o__Cryptophyta; f__; g__; s__	0.000563426	0.000281713	0.00100612	0.000281713	0	0.000201223	0.000201223	0.000160979	0.000523181	0	0	0	0.000281713	8.04894e-05	0.000160979	0.000321958	0.000442692	0.000281713	0	8.04894e-05	0	0.00362202	0.00358178	0.00478912	0	0	0	0.000201223	0.000120734	0.000120734	0	4.02447e-05	4.02447e-05	8.04894e-05	0	0.000160979	0	0	0	0	0	0	0	0	0	0	0	0
OTU_192	k__Bacteria; p__Proteobacteria; c__Alphaproteobacteria; o__Ellin329; f__; g__; s__	0.000241468	0.000120734	0.000201223	4.02447e-05	0.000160979	4.02447e-05	0.000281713	0.000120734	0.000241468	4.02447e-05	0	4.02447e-05	0.000281713	8.04894e-05	0.000120734	0.000201223	8.04894e-05	0.000241468	8.04894e-05	4.02447e-05	4.02447e-05	0	4.02447e-05	0	0	0	4.02447e-05	0	4.02447e-05	8.04894e-05	0.000523181	0.000764649	0.000362202	0.000845138	0.00060367	0.000482936	0.00060367	0.000482936	0.000321958	0.000120734	8.04894e-05	0.000120734	0.000160979	0.000563426	0.000563426	0.000160979	4.02447e-05	0
OTU_12570	k__Bacteria; p__Proteobacteria; c__Alphaproteobacteria; o__Sphingomonadales; f__Erythrobacteraceae; g__; s__	8.04894e-05	0.000321958	0.000201223	0.000120734	0.00060367	0.000120734	0.000160979	0.000120734	0.000120734	0.000442692	0.000281713	0.000160979	0.000120734	0.000523181	0.000120734	4.02447e-05	0.000120734	0.000120734	0.000201223	0.000281713	0.000160979	0.000321958	0.000201223	0.000241468	0.00309884	0.00181101	0.00233419	0.00068416	0.000523181	0.000482936	0.000241468	0.000120734	4.02447e-05	0.000321958	0.000241468	8.04894e-05	0.000281713	0.000321958	0.000281713	0.000281713	0.000201223	4.02447e-05	4.02447e-05	0.000120734	0.000160979	8.04894e-05	0	4.02447e-05
OTU_13749	k__Bacteria; p__Proteobacteria; c__Betaproteobacteria; o__Burkholderiales; f__Comamonadaceae; g__Methylibium; s__	0.000643915	0.000201223	0.000321958	0.000362202	0.000362202	0.000120734	8.04894e-05	0.000362202	8.04894e-05	8.04894e-05	0.000160979	4.02447e-05	0.000160979	0.000201223	0.000724404	0.000241468	0.000120734	0.000201223	0.000321958	0.000281713	0.000362202	0.000563426	0.000402447	0.000362202	4.02447e-05	0.000281713	0.000362202	0.000845138	0.000482936	0.000201223	0.000442692	0.000281713	0.000160979	0.000241468	0.000241468	0.000241468	0.000160979	0.000160979	0.000281713	0.000201223	0.000241468	0.000241468	0.000120734	0.000402447	0.000120734	0.000402447	0.000482936	0.000482936
OTU_250	k__Bacteria; p__Bacteroidetes; c__Sphingobacteriia; o__Sphingobacteriales; f__; g__; s__	0.00068416	0.000160979	0.000120734	0.000724404	0.000160979	0.000563426	0.000563426	0.000482936	0.000482936	0	0	4.02447e-05	0.000482936	0.000362202	0.000402447	0.000362202	0.000241468	0.000482936	0	4.02447e-05	0	0.00132807	0.0015293	0.00104636	0.000160979	0.000120734	0.000120734	0.000281713	0.000321958	0.000120734	0.000321958	8.04894e-05	0.000241468	0.000482936	0.000402447	0.000442692	0.000160979	0.000201223	0.000321958	4.02447e-05	8.04894e-05	4.02447e-05	0.000241468	0.000523181	0.000563426	0.000201223	0.000120734	0.000201223
OTU_9243	k__Bacteria; p__Proteobacteria; c__Betaproteobacteria; o__Burkholderiales; f__Comamonadaceae	0.000563426	0.000563426	0.000523181	0.000281713	0.000201223	0.000160979	0.000201223	0.000281713	0.000201223	0.000241468	0.000442692	0.000321958	0.000442692	0.000120734	0.000482936	0.000120734	0.000201223	0.000160979	0.000201223	0.00060367	0.000482936	0.000643915	0.000442692	0.000482936	4.02447e-05	0.000160979	0.000201223	0.000241468	0.000160979	0.000160979	8.04894e-05	0.000241468	0.000402447	0.000281713	0.00060367	0.000321958	8.04894e-05	8.04894e-05	8.04894e-05	0.000563426	0.000402447	0.000402447	4.02447e-05	8.04894e-05	8.04894e-05	0.00144881	0.000643915	0.000764649
OTU_204	k__Bacteria; p__Bacteroidetes; c__Sphingobacteriia; o__Sphingobacteriales; f__; g__; s__	0.00060367	0.000563426	0.000241468	0.000160979	8.04894e-05	4.02447e-05	0.000120734	0.000281713	0.000201223	4.02447e-05	4.02447e-05	0	8.04894e-05	0	8.04894e-05	0.000160979	0.000281713	0.000523181	0	0.000160979	8.04894e-05	0	4.02447e-05	0	0.000160979	0.000120734	0.000241468	0.000281713	0.000321958	4.02447e-05	0.000362202	0.000160979	0.000160979	0.000362202	0.000160979	0.000241468	0.000241468	0.000523181	0.000442692	0.000764649	0.000482936	0.000845138	0.00156954	0.00124759	0.00193175	0.000402447	0.000563426	0.000362202
OTU_188	k__Bacteria; p__Firmicutes; c__Bacilli; o__Bacillales; f__Planococcaceae; g__Chryseomicrobium; s__imtechense	0.000120734	0.000120734	0.000120734	0.000160979	0.000321958	0.000160979	4.02447e-05	0.000241468	0	0.000120734	8.04894e-05	8.04894e-05	0.000321958	0.000160979	4.02447e-05	0.000160979	8.04894e-05	4.02447e-05	0.000321958	0.000160979	8.04894e-05	8.04894e-05	4.02447e-05	0.000160979	0.00309884	0.000925628	0.00499034	0.000482936	0.000724404	0.000643915	0	8.04894e-05	8.04894e-05	0.000201223	0.000362202	4.02447e-05	0.000120734	0.000160979	0.000402447	4.02447e-05	0	0.000120734	0.000442692	4.02447e-05	4.02447e-05	8.04894e-05	0.000120734	8.04894e-05
OTU_190	k__Bacteria; p__Verrucomicrobia; c__Verrucomicrobiae; o__Verrucomicrobiales; f__Verrucomicrobiaceae; g__Luteolibacter; s__	4.02447e-05	4.02447e-05	4.02447e-05	8.04894e-05	8.04894e-05	0	0	0	0.000120734	0.00454765	0.00265615	0.00346104	0	4.02447e-05	4.02447e-05	0	0.000281713	0.000201223	0	4.02447e-05	0	0.000160979	0.000120734	8.04894e-05	0.00185126	0.000885383	0.00124759	8.04894e-05	8.04894e-05	0.000362202	4.02447e-05	4.02447e-05	0	0	0.000160979	4.02447e-05	0	0	0	0	0	0	4.02447e-05	0	0	0	0	8.04894e-05
OTU_4456	k__Bacteria; p__Gemmatimonadetes; c__Gemmatimonadetes; o__Gemmatimonadales; f__Gemmatimonadaceae; g__Gemmatimonas; s__	0.000362202	0.000281713	0.000201223	0.000321958	0.000201223	0.000281713	0.000482936	0.000402447	0.000402447	0	8.04894e-05	0	0.000321958	0	0.000362202	0.000241468	0.000321958	0.000764649	0	4.02447e-05	4.02447e-05	0.000120734	0.000120734	0.000241468	0.000201223	4.02447e-05	8.04894e-05	0.000201223	0.000321958	0.000321958	0.000281713	0.000160979	0.000563426	0.000402447	0.000523181	0.000563426	0.00140856	0.00132807	0.00132807	0.000281713	0.000160979	0.000160979	0.000482936	0.00060367	0.00068416	0.000241468	0	0.000201223
OTU_184	k__Bacteria; p__Bacteroidetes; c__Flavobacteriia; o__Flavobacteriales; f__Cryomorphaceae; g__Fluviicola; s__	0.00060367	8.04894e-05	0.000160979	0.000362202	0.000241468	0.000321958	0.000120734	0.000160979	0.000241468	4.02447e-05	0	0	0.000241468	0	4.02447e-05	0.000442692	0.000402447	8.04894e-05	4.02447e-05	0	0	4.02447e-05	4.02447e-05	0.000201223	0	0	0	0	4.02447e-05	4.02447e-05	0.000120734	0	0	0	0.000120734	0.000120734	0.000442692	0.000201223	0.000281713	0.00221346	0.00301835	0.00269639	0.00128783	0.000925628	0.00108661	0.000201223	4.02447e-05	0.000201223
OTU_238	k__Bacteria; p__Proteobacteria; c__Gammaproteobacteria; o__Xanthomonadales; f__Xanthomonadaceae; g__; s__	0.000281713	0.000201223	0.000120734	0.000241468	0.000362202	0.000160979	0.000120734	0.000120734	0.000160979	0	0	0	0.000201223	0.000201223	0.000120734	0.000201223	0.000321958	0.000482936	0.000281713	0.000321958	0.000120734	0.000321958	0.000160979	0.000402447	0.0011671	0.00060367	0.000643915	0.000563426	0.000965873	0.000523181	0.000442692	0.00068416	0.000402447	0.000764649	0.000764649	0.000643915	0.000201223	0.000804894	0.000523181	4.02447e-05	0.000120734	4.02447e-05	0.000281713	4.02447e-05	4.02447e-05	0.000241468	0.000120734	0.000160979
OTU_12757	k__Bacteria; p__Actinobacteria; c__Acidimicrobiia; o__Acidimicrobiales; f__C111; g__; s__	4.02447e-05	8.04894e-05	0	0	4.02447e-05	4.02447e-05	0	0	0	0	0	0	0	8.04894e-05	0	0	8.04894e-05	4.02447e-05	4.02447e-05	0.000201223	0	0	0	0	0	0	4.02447e-05	0	0	4.02447e-05	0	4.02447e-05	0	0.000120734	8.04894e-05	8.04894e-05	0.00156954	0.00100612	0.00112685	0.000241468	0.000804894	0.000281713	0.00217321	0.00173052	0.00229395	0.00068416	0.00181101	0.000442692
OTU_12133	k__Bacteria; p__Cyanobacteria; c__Chloroplast; o__Cryptophyta; f__; g__; s__	0.000482936	8.04894e-05	0.000362202	0.000482936	0.000523181	0.00124759	0.000885383	0.000845138	0.000885383	4.02447e-05	0	0	0.000362202	0.000241468	0.000402447	0.000845138	0.000965873	0.00060367	0	0	0	0.000321958	0.000563426	0.00068416	4.02447e-05	4.02447e-05	0	0.000643915	0.000281713	0.000201223	0.000402447	4.02447e-05	0	0.000402447	0.000160979	0.000120734	0.000201223	4.02447e-05	4.02447e-05	8.04894e-05	8.04894e-05	0	0.000724404	0.000643915	0.00100612	0.000160979	0.000160979	0.000241468
OTU_16782	k__Bacteria; p__Proteobacteria; c__Betaproteobacteria; o__Burkholderiales; f__Comamonadaceae; g__Diaphorobacter; s__	0.000201223	0.000442692	0.000201223	4.02447e-05	0.000160979	0.000120734	8.04894e-05	0.000160979	4.02447e-05	0.00120734	0.000965873	0.00100612	0.000321958	0.000402447	0.000321958	0.000160979	8.04894e-05	0.000120734	0.000643915	0.000482936	0.000321958	0.000442692	0.000442692	0.000482936	0.000201223	8.04894e-05	0.000201223	0.000160979	4.02447e-05	0.000321958	0.000201223	0.000241468	0.000160979	8.04894e-05	0.000120734	0.000201223	0.000201223	0.000120734	0.000160979	0.000241468	0.000120734	0.000362202	8.04894e-05	4.02447e-05	4.02447e-05	0.000281713	0.000523181	0.000160979
OTU_213	k__Bacteria; p__Bacteroidetes; c__Flavobacteriia; o__Flavobacteriales; f__Cryomorphaceae; g__; s__	4.02447e-05	0	0.000120734	4.02447e-05	4.02447e-05	8.04894e-05	4.02447e-05	8.04894e-05	0.000120734	4.02447e-05	0	0	8.04894e-05	4.02447e-05	0.000120734	4.02447e-05	4.02447e-05	0.000160979	0	4.02447e-05	0	0	0	4.02447e-05	0	0	0	4.02447e-05	0.000120734	0.000120734	0.000160979	0	0	0.000241468	8.04894e-05	0.000160979	0.000925628	0.000643915	0.000402447	0.00120734	0.00169028	0.00104636	0.00217321	0.00193175	0.00233419	0.000362202	0.000362202	0.000724404
OTU_177	k__Bacteria; p__Verrucomicrobia; c__Verrucomicrobiae; o__Verrucomicrobiales; f__Verrucomicrobiaceae; g__Luteolibacter; s__	0.000281713	0.000321958	0.000120734	0.000241468	4.02447e-05	4.02447e-05	0	0	4.02447e-05	0.0049501	0.00346104	0.00486961	0	0	0	4.02447e-05	8.04894e-05	4.02447e-05	0	0	0	0.000362202	0.000362202	0.000321958	0.000120734	0	0.000120734	0.000120734	0.000120734	0.000120734	0	0	4.02447e-05	4.02447e-05	0	0	0	0	0	0	4.02447e-05	0	0	4.02447e-05	0	0	0	0
OTU_19366	k__Bacteria; p__Bacteroidetes; c__Flavobacteriia; o__Flavobacteriales; f__Flavobacteriaceae; g__Flavobacterium; s__gelidilacus	4.02447e-05	0.000120734	8.04894e-05	0.000120734	0.000362202	0.000281713	0.000201223	0	0.000160979	0	0	0	8.04894e-05	4.02447e-05	8.04894e-05	0.000120734	4.02447e-05	0.000160979	8.04894e-05	0.000120734	0.000281713	0.00281713	0.00313909	0.00209272	0.00100612	0.000321958	0.000885383	8.04894e-05	8.04894e-05	8.04894e-05	0.000281713	0.000201223	4.02447e-05	0.000201223	0.00060367	0.000160979	0	0	0	4.02447e-05	8.04894e-05	8.04894e-05	0.000201223	4.02447e-05	0.000160979	8.04894e-05	4.02447e-05	4.02447e-05
OTU_225	k__Bacteria; p__Bacteroidetes; c__Flavobacteriia; o__Flavobacteriales; f__[Weeksellaceae]; g__Cloacibacterium; s__	0.000120734	0.000120734	8.04894e-05	0.00132807	0.00241468	0.00205248	0.000281713	8.04894e-05	0.000281713	0.000523181	0.000201223	0.000321958	0.000160979	0.00100612	0.000402447	0.000201223	0.000241468	0.000402447	0.000281713	0.000120734	8.04894e-05	0.000321958	0.000120734	0.000201223	0.000523181	0.000281713	0.00060367	0.000120734	0.000160979	0.000160979	0	0.000160979	0.000120734	0.000160979	4.02447e-05	0.000160979	4.02447e-05	8.04894e-05	4.02447e-05	0.000362202	0.000321958	0.000321958	0.000120734	4.02447e-05	4.02447e-05	4.02447e-05	0.000120734	4.02447e-05
OTU_54	k__Bacteria; p__Proteobacteria; c__Betaproteobacteria; o__Burkholderiales; f__Oxalobacteraceae; g__; s__	0.00100612	0.000402447	0.000442692	0.000362202	8.04894e-05	0.000201223	0.000201223	0.000281713	0.000362202	0.000281713	0.000241468	0.000120734	0.000362202	0.000241468	0.000362202	8.04894e-05	0.000201223	0.000201223	0.000643915	0.000563426	0.000321958	8.04894e-05	4.02447e-05	0.000160979	0.000281713	0.000281713	0.000321958	8.04894e-05	0.000241468	0.000160979	0.000160979	0.000120734	0.000160979	4.02447e-05	8.04894e-05	0.000241468	0.000201223	0.000241468	0.000160979	0.000241468	0.000241468	0.000241468	0.000160979	0.000281713	0.000201223	0.000120734	8.04894e-05	0.000442692
OTU_12537	k__Bacteria; p__Cyanobacteria; c__Chloroplast; o__Stramenopiles; f__; g__; s__	0.00128783	0.000724404	0.000965873	0.00068416	0.000885383	0.000523181	0.000724404	0.00104636	0.000241468	8.04894e-05	0	0.000201223	0.000362202	0.000160979	0.000482936	0.000523181	0.000563426	0.00060367	4.02447e-05	4.02447e-05	8.04894e-05	0.000241468	0.00060367	0.000321958	4.02447e-05	4.02447e-05	0	0.000402447	0.000362202	8.04894e-05	0.000241468	0.000764649	0.000643915	0.000241468	0.000281713	0.000482936	0.000241468	0.000201223	0.000402447	4.02447e-05	0.000241468	4.02447e-05	0	0	4.02447e-05	0	4.02447e-05	0
OTU_13814	k__Bacteria; p__Proteobacteria; c__Betaproteobacteria; o__Burkholderiales; f__Comamonadaceae; g__Methylibium	8.04894e-05	0.000241468	0.000201223	0.000402447	0.000563426	0.000201223	4.02447e-05	0.000201223	0.000120734	0.000120734	0.000120734	4.02447e-05	0.000241468	0.000160979	0.000241468	0.000201223	0.000120734	0.000321958	0.000281713	0.000402447	0.000281713	0.000120734	0.000241468	0.000764649	0.00060367	0.000321958	0.000321958	0.000120734	0.000482936	0.000160979	0.000281713	0.000201223	0.000321958	0.000362202	0.000362202	0.000281713	0.00060367	0.000442692	0.000241468	0.000160979	0.000281713	0.000321958	0.000160979	0.000804894	0.000120734	0.00160979	0.000120734	0.000362202
OTU_7441	k__Bacteria; p__Actinobacteria; c__Actinobacteria; o__Actinomycetales; f__ACK-M1; g__; s__	8.04894e-05	0.000362202	0.000201223	0.000241468	0.000402447	0.000241468	0.000321958	0.000523181	4.02447e-05	0.000845138	0.00112685	0.000925628	0.000201223	8.04894e-05	0.000160979	0.000362202	0.000201223	0.000241468	0	0.000201223	0	4.02447e-05	0	8.04894e-05	8.04894e-05	0	4.02447e-05	0.000241468	8.04894e-05	0.000120734	0.000321958	0.00068416	0.000482936	0.00068416	0.000241468	0.00060367	4.02447e-05	4.02447e-05	8.04894e-05	0.000201223	0.000120734	0.000160979	0.000201223	0.000764649	0.000241468	0.000201223	8.04894e-05	0.000201223
OTU_8147	k__Bacteria; p__Cyanobacteria; c__Chloroplast; o__Stramenopiles; f__; g__; s__	0.000160979	4.02447e-05	0.000160979	0.000362202	0.00104636	0.000201223	0.000402447	0.000442692	0.000201223	4.02447e-05	0	0	0	4.02447e-05	0	0.000402447	0.000402447	0.000845138	0	4.02447e-05	0	0.0015293	0.00201223	0.00301835	0.000201223	0.000120734	0.00112685	0.000442692	8.04894e-05	0.000321958	0.000201223	4.02447e-05	0	0.000201223	0.000160979	0.000160979	0	0.000120734	0.000241468	0.000201223	0.000160979	4.02447e-05	4.02447e-05	4.02447e-05	4.02447e-05	8.04894e-05	4.02447e-05	4.02447e-05
OTU_17769	k__Bacteria; p__Actinobacteria; c__Actinobacteria; o__Actinomycetales; f__ACK-M1; g__; s__	0.000160979	0.000523181	0.000362202	0.000281713	0.000241468	0.000160979	0.000523181	0.000442692	8.04894e-05	4.02447e-05	8.04894e-05	0	0.000362202	0.000120734	0.000120734	0.000281713	0.000241468	0.000643915	0.000160979	0.000563426	0.000321958	4.02447e-05	8.04894e-05	0.000120734	0	0	0	0.000241468	0.000241468	0.000442692	0.000482936	0.00068416	0.000402447	0.00104636	0.000925628	0.000845138	0.000281713	4.02447e-05	0.000120734	0.000120734	4.02447e-05	4.02447e-05	4.02447e-05	4.02447e-05	4.02447e-05	0	0	8.04894e-05
OTU_18999	k__Bacteria; p__Proteobacteria; c__Gammaproteobacteria; o__Xanthomonadales; f__Xanthomonadaceae; g__; s__	8.04894e-05	8.04894e-05	4.02447e-05	8.04894e-05	0.00100612	0.000160979	8.04894e-05	0.000120734	0.000201223	0	4.02447e-05	4.02447e-05	4.02447e-05	0.000201223	4.02447e-05	8.04894e-05	0.000281713	0.000201223	0.000442692	0.000523181	8.04894e-05	0.000281713	4.02447e-05	0.000241468	0.00241468	0.00221346	0.00209272	0.000321958	0.00144881	0.000563426	0.000201223	8.04894e-05	0.000201223	0.000201223	0.000442692	4.02447e-05	0.000201223	8.04894e-05	0.000120734	0	0	4.02447e-05	4.02447e-05	0	4.02447e-05	4.02447e-05	0	0
OTU_228	k__Bacteria; p__Bacteroidetes; c__Sphingobacteriia; o__Sphingobacteriales; f__; g__; s__	4.02447e-05	8.04894e-05	0.000120734	4.02447e-05	0.000120734	0	0.000120734	0	4.02447e-05	0	0	0	8.04894e-05	8.04894e-05	0.000160979	0.000120734	0.000241468	0.000402447	0	0	4.02447e-05	0	4.02447e-05	0	0	0	0	4.02447e-05	4.02447e-05	4.02447e-05	0.000120734	4.02447e-05	0.000160979	0	8.04894e-05	0.000120734	0.00160979	0.00132807	0.00156954	0.00108661	0.00108661	0.00128783	0.0015293	0.00128783	0.00201223	0.000281713	0.000321958	0.000241468
OTU_14020	k__Bacteria; p__Proteobacteria; c__Betaproteobacteria; o__Burkholderiales; f__Comamonadaceae; g__Methylibium; s__	0.000281713	4.02447e-05	8.04894e-05	0.000321958	0.000241468	0.000281713	8.04894e-05	0.000120734	0	0.000160979	0.000241468	8.04894e-05	0.000160979	0.000201223	0.000321958	0.000241468	0.000201223	0.000321958	0.000321958	0.000281713	0.000402447	0.000281713	0.000160979	0.000281713	0.000120734	0.000120734	0.000160979	0.000281713	0.000160979	0.000241468	0.000201223	0.000241468	0	0.000241468	0.00100612	0.000321958	0.000925628	0.000442692	0.000120734	0.000160979	0.000120734	0.000643915	8.04894e-05	0.00144881	0	0.00213297	0.000241468	0.000160979
OTU_227	k__Bacteria; p__Planctomycetes; c__Phycisphaerae; o__Phycisphaerales; f__; g__; s__	0.000120734	4.02447e-05	0.000201223	0.000321958	4.02447e-05	0.000362202	0.000241468	0.000362202	0.000523181	0	0	0	8.04894e-05	4.02447e-05	0.000120734	8.04894e-05	0.000241468	0.000120734	0	8.04894e-05	0	8.04894e-05	0.000482936	0.000201223	0	0	0	0.000442692	0.000120734	0.000120734	0.000281713	0	0	4.02447e-05	0.000160979	0.000160979	0.000482936	0.000402447	0.000643915	4.02447e-05	0.000201223	0.000120734	0.00193175	0.00241468	0.00386349	0.000160979	0.000201223	0.000241468
OTU_19721	k__Bacteria; p__Bacteroidetes; c__[Saprospirae]; o__[Saprospirales]; f__Chitinophagaceae; g__Sediminibacterium; s__	0.00060367	0.000160979	0.000120734	0.000241468	0.000241468	0.000201223	0.000160979	0.000241468	8.04894e-05	0.000241468	0.000402447	0.000241468	0.000201223	4.02447e-05	0.000321958	0.000120734	0.000321958	0.000482936	0.000201223	8.04894e-05	0.000362202	0.000925628	0.00132807	0.0011671	0.000442692	0.000281713	0.000402447	0.000241468	0.000402447	0.000402447	8.04894e-05	0.000241468	0.000160979	0.000523181	0.00144881	0.000362202	0.000160979	0.000281713	4.02447e-05	0.000201223	0.000160979	8.04894e-05	0.000120734	0	0	4.02447e-05	0.000241468	0.000160979
OTU_277	k__Bacteria; p__Acidobacteria; c__Acidobacteria-6; o__iii1-15; f__; g__; s__	0.000281713	0.000201223	0.000120734	8.04894e-05	0	0.000241468	8.04894e-05	0.000362202	0.000120734	4.02447e-05	0	0	0.000281713	0.000120734	4.02447e-05	0.000281713	0.000281713	0.000281713	0.000120734	0.000160979	0.000120734	4.02447e-05	0.000160979	8.04894e-05	0.000120734	8.04894e-05	0.000201223	0.000321958	0.000201223	0.000241468	0.000402447	0.000362202	0.000321958	0.000321958	0.000321958	0.000281713	0.00120734	0.00128783	0.0011671	4.02447e-05	4.02447e-05	4.02447e-05	0.00068416	0.000804894	0.0015293	0.000523181	0.000201223	0.000321958
OTU_173	k__Bacteria; p__Planctomycetes; c__Planctomycetia; o__Gemmatales; f__Isosphaeraceae; g__; s__	0.00120734	0.00169028	0.00185126	4.02447e-05	0.000160979	0.000321958	8.04894e-05	0.000201223	0.000643915	4.02447e-05	0.000120734	0.000120734	0	0.000160979	0.000160979	4.02447e-05	0.000362202	0.000281713	0.000120734	0.000402447	0	0.000563426	0.00068416	0.000281713	0.00173052	0.000845138	0.0015293	0.000120734	0.000120734	0.000201223	0.000160979	4.02447e-05	0.000201223	0.000120734	8.04894e-05	4.02447e-05	0.000241468	0.000281713	0.000160979	0	4.02447e-05	0	0.000160979	4.02447e-05	0.000160979	0	4.02447e-05	4.02447e-05
OTU_20030	k__Bacteria; p__Bacteroidetes; c__Cytophagia; o__Cytophagales; f__Cytophagaceae; g__Hymenobacter; s__	0.000241468	0.000281713	0.000120734	0.000120734	0.000362202	0.000281713	0.000482936	0.000523181	0.000241468	0.000160979	0.000201223	0.000402447	0.000281713	0.000120734	0.000523181	0.000241468	8.04894e-05	0.000442692	0.000402447	0.000201223	0.000201223	0.000241468	0.000362202	0.000321958	0.00068416	0.000724404	0.00112685	0.000281713	0.000402447	0.000281713	0.000241468	0.000160979	0.000321958	0.000241468	0.000201223	0.000281713	8.04894e-05	0.000120734	0	0.000201223	0.000160979	0.000241468	0.00060367	4.02447e-05	0.000201223	0.000160979	0.000120734	0.000241468
OTU_219	k__Bacteria; p__Actinobacteria; c__Actinobacteria; o__Actinomycetales; f__Microbacteriaceae; g__; s__	0	0.000120734	0	8.04894e-05	0	4.02447e-05	4.02447e-05	4.02447e-05	0	0.000362202	0.000321958	0.000160979	8.04894e-05	0	0	4.02447e-05	0	4.02447e-05	0	0	0	0.00173052	0.0026159	0.00205248	0.00197199	0.00100612	0.000965873	0	0.000120734	4.02447e-05	0.000120734	0.000160979	4.02447e-05	8.04894e-05	0	8.04894e-05	4.02447e-05	0	4.02447e-05	0	0	0	0	0	0	8.04894e-05	4.02447e-05	0
OTU_8247	k__Bacteria; p__Cyanobacteria; c__Chloroplast; o__Stramenopiles; f__; g__; s__	0.000523181	0.000321958	0.000643915	0.000724404	0.00108661	0.000362202	0.000563426	0.00120734	0.000482936	4.02447e-05	4.02447e-05	0	0.000201223	8.04894e-05	0.000321958	0.000643915	0.000845138	0.000523181	0	4.02447e-05	0	0.000120734	0.000120734	8.04894e-05	4.02447e-05	4.02447e-05	0	0.000281713	0.000160979	8.04894e-05	0.000402447	0.000362202	0.000241468	0.000482936	0.00060367	0.000482936	0.000201223	0.000201223	0.000362202	0.00060367	0.000523181	0.000281713	0.000482936	8.04894e-05	8.04894e-05	0	0	4.02447e-05
OTU_220	k__Bacteria; p__Bacteroidetes; c__Flavobacteriia; o__Flavobacteriales; f__Cryomorphaceae; g__Fluviicola; s__	0.00128783	0.000563426	0.000724404	0.000362202	0.000362202	0.000241468	0.000442692	0.000442692	0.000442692	0	4.02447e-05	0	0.000523181	0.000885383	0.000241468	0.000482936	0.000724404	0.000563426	4.02447e-05	8.04894e-05	0	0.000120734	4.02447e-05	8.04894e-05	0	8.04894e-05	0.000120734	0.000321958	4.02447e-05	0.000160979	0.000442692	0.000523181	0.000362202	0.000643915	0.000362202	0.000482936	0.000563426	0.000563426	0.000402447	0.000201223	0.000321958	0.000160979	0.000281713	0.000241468	0.000321958	0	4.02447e-05	8.04894e-05
OTU_14016	k__Bacteria; p__Proteobacteria; c__Alphaproteobacteria; o__Rhizobiales; f__Rhizobiaceae; g__Agrobacterium; s__	0.000160979	0.000281713	0.000160979	8.04894e-05	8.04894e-05	0	0	4.02447e-05	0	0.000201223	8.04894e-05	0.000160979	0	0.000321958	8.04894e-05	4.02447e-05	8.04894e-05	4.02447e-05	0.00108661	0.000241468	0.00181101	0.000120734	4.02447e-05	8.04894e-05	0.00100612	0.00108661	0.000281713	4.02447e-05	0.000201223	8.04894e-05	4.02447e-05	8.04894e-05	0.000160979	0.000160979	0.00060367	0	0.000482936	0.000201223	0.000241468	0.000120734	8.04894e-05	0.000362202	0.000523181	4.02447e-05	0	0.000241468	0.000804894	0.00334031
OTU_11735	k__Bacteria; p__Cyanobacteria; c__Chloroplast; o__Cryptophyta; f__; g__; s__	0.00060367	0.00068416	0.000764649	0.000402447	0.000362202	0.000724404	0.000321958	4.02447e-05	0.000362202	0.00112685	0.000442692	0.000965873	0.000281713	0.000201223	0.000241468	0.000160979	0.000321958	0.000321958	4.02447e-05	0.000563426	0.000120734	0.00060367	0.000563426	0.000764649	0	0	0	0.000241468	0.000241468	4.02447e-05	0.000241468	0.000402447	0.000120734	0.000281713	0.000160979	0.000885383	8.04894e-05	0	0	4.02447e-05	0	0	0	0	8.04894e-05	4.02447e-05	0	4.02447e-05
OTU_223	k__Bacteria; p__Proteobacteria; c__Gammaproteobacteria; o__Pseudomonadales; f__Moraxellaceae; g__Enhydrobacter; s__	0	0.000201223	8.04894e-05	0.00140856	0.0018915	0.000965873	8.04894e-05	8.04894e-05	8.04894e-05	4.02447e-05	0	4.02447e-05	0.000160979	0.000442692	0.000442692	4.02447e-05	0.000120734	0.000120734	0.000362202	0.000160979	0.00068416	0.000120734	4.02447e-05	4.02447e-05	0.000442692	0.000523181	0.000120734	4.02447e-05	4.02447e-05	8.04894e-05	4.02447e-05	0	0	0.000201223	0.000120734	0.000442692	0.000764649	0.000482936	4.02447e-05	8.04894e-05	0.000321958	0.000160979	0.000241468	0	0	0.000764649	0.00112685	0.000362202
OTU_201	k__Bacteria; p__Actinobacteria; c__Actinobacteria; o__Actinomycetales; f__Mycobacteriaceae; g__Mycobacterium; s__	0.000523181	0.000965873	0.00068416	4.02447e-05	0.000201223	0.000160979	0.000120734	0.000201223	0.000442692	0.000241468	0.000281713	0.000281713	0.000120734	0.000241468	0.000160979	0.000120734	0.000120734	0.000241468	0.000321958	0.000201223	4.02447e-05	0.000120734	8.04894e-05	0.000241468	4.02447e-05	0.000120734	0.000160979	0.000201223	0.000241468	0.000201223	8.04894e-05	8.04894e-05	4.02447e-05	0.000362202	8.04894e-05	0.000160979	0.000201223	0.000523181	0.000120734	4.02447e-05	4.02447e-05	0.000160979	0.000120734	0.000201223	0.000160979	8.04894e-05	8.04894e-05	4.02447e-05
OTU_235	k__Bacteria; p__Verrucomicrobia; c__[Spartobacteria]; o__[Chthoniobacterales]; f__[Chthoniobacteraceae]; g__Candidatus Xiphinematobacter; s__	0.000160979	0.000643915	0.000281713	0.00108661	0.00136832	0.00177077	0.000120734	0.000402447	0.00108661	0	0	0	0.000201223	0.0011671	0.000764649	0.000160979	0.000482936	0.000321958	0.000201223	0.000482936	8.04894e-05	0	0	0	0	0	4.02447e-05	0.000885383	0.00060367	0.00068416	0.000482936	0.000241468	0.000241468	0.000362202	8.04894e-05	0.000523181	0.000120734	0.000120734	0.000281713	0	0	0	0	0	0	0	0	0
OTU_211	k__Bacteria; p__Bacteroidetes; c__Flavobacteriia; o__Flavobacteriales; f__Flavobacteriaceae; g__Flavobacterium; s__columnare	0.000321958	4.02447e-05	4.02447e-05	0.000643915	0.00068416	0.000241468	8.04894e-05	0.000321958	0.000321958	0.000563426	0.000764649	0.000724404	0.000201223	0.000241468	4.02447e-05	8.04894e-05	0.000241468	0.000402447	0.000281713	0.000241468	0.00060367	0.000482936	0.000362202	0.000321958	0.00181101	0.000442692	0.00181101	0.000281713	0.000482936	0.000281713	0.000281713	0.000281713	8.04894e-05	8.04894e-05	0.000160979	0.000201223	0.000120734	0.000120734	4.02447e-05	0	4.02447e-05	0	8.04894e-05	0	4.02447e-05	4.02447e-05	4.02447e-05	4.02447e-05
OTU_242	k__Bacteria; p__Bacteroidetes; c__Flavobacteriia; o__Flavobacteriales; f__Cryomorphaceae; g__Fluviicola; s__	0.000764649	0.000201223	0.000523181	0.000442692	0.000523181	0.00060367	0.000563426	0.00100612	0.000643915	0	4.02447e-05	4.02447e-05	0.000362202	0	0.000201223	0.000804894	0.000482936	0.000845138	0	4.02447e-05	0	4.02447e-05	4.02447e-05	0	0	0	0	0.000482936	0.00068416	0.000241468	0.000281713	0.000281713	0.000402447	0.000321958	0.000201223	0.000321958	0	4.02447e-05	8.04894e-05	0.000643915	0.000643915	0.00068416	0.000724404	0.000321958	0.000643915	0	4.02447e-05	4.02447e-05
OTU_182	k__Bacteria; p__Bacteroidetes; c__[Saprospirae]; o__[Saprospirales]; f__Chitinophagaceae; g__; s__	0.00100612	0.000925628	0.00120734	0.000160979	0.000241468	0.000120734	0.000160979	0.000201223	0.000241468	0.00237444	0.00241468	0.00197199	0	0.000120734	8.04894e-05	0.000160979	4.02447e-05	0.000120734	0.000804894	0.000321958	0.000482936	0.000120734	0	0	0.000120734	0	0.000160979	0	0	0.000160979	8.04894e-05	8.04894e-05	0.000402447	8.04894e-05	4.02447e-05	8.04894e-05	4.02447e-05	0	0	0.000120734	0	4.02447e-05	0.000120734	4.02447e-05	8.04894e-05	0	0	0
OTU_284	k__Bacteria; p__Firmicutes; c__Bacilli; o__Turicibacterales; f__Turicibacteraceae; g__Turicibacter; s__	0.000241468	0.000201223	0.000241468	0.000321958	0.000402447	0.000120734	0.000120734	8.04894e-05	0.000281713	0.000120734	0.000321958	0.000160979	0.000321958	8.04894e-05	0.000201223	0.000241468	0.000160979	0.000201223	8.04894e-05	8.04894e-05	0.000402447	0.000281713	0.000241468	0.000321958	0.000764649	0.000321958	0.00108661	0.000281713	0.000160979	0.000160979	0.000120734	0.000201223	0.000160979	0.000321958	0.000241468	0.000160979	0.000281713	0.000523181	0.00124759	4.02447e-05	0.000160979	0.000402447	0.000482936	0.000160979	0.000241468	0.000281713	0.000241468	0.000201223
OTU_226	k__Bacteria; p__Bacteroidetes; c__Flavobacteriia; o__Flavobacteriales; f__Cryomorphaceae; g__Fluviicola; s__	0.00100612	0.000563426	0.000482936	0.000201223	0.000160979	8.04894e-05	0.000321958	0.000442692	0.000321958	0	0	0	0.000321958	0.000160979	0.000281713	0.000201223	0.000201223	0.000160979	4.02447e-05	0	0	0.000120734	4.02447e-05	0	8.04894e-05	0.000120734	4.02447e-05	0.000281713	0.000482936	0.000281713	0.000362202	0.000201223	0.000402447	0.000442692	0.000201223	0.000281713	8.04894e-05	4.02447e-05	8.04894e-05	0.000885383	0.00132807	0.000965873	0.00112685	0.000482936	0.000442692	0.000402447	0.000281713	0.000281713
OTU_244	k__Bacteria; p__Bacteroidetes; c__[Saprospirae]; o__[Saprospirales]; f__Chitinophagaceae; g__; s__	0.000845138	0.000563426	0.000965873	0.000321958	0.000523181	0.000321958	0.000160979	8.04894e-05	0.00060367	0.000362202	4.02447e-05	0.000120734	0.000321958	0.000321958	0.000281713	8.04894e-05	0.000241468	0.000321958	0.000160979	0.000201223	4.02447e-05	0.000160979	4.02447e-05	0.000201223	0.0015293	0.000724404	0.00217321	0.000321958	0.000563426	0.000523181	4.02447e-05	0.000201223	0.000201223	0.000201223	0.000241468	0.000160979	0	0	8.04894e-05	8.04894e-05	0	0	0	0	4.02447e-05	4.02447e-05	4.02447e-05	0
OTU_11670	k__Bacteria; p__Verrucomicrobia; c__Verrucomicrobiae; o__Verrucomicrobiales; f__Verrucomicrobiaceae; g__; s__	0.000120734	0.000120734	0.000120734	0.00068416	0.000925628	0.000965873	8.04894e-05	0.000201223	0.000643915	8.04894e-05	4.02447e-05	8.04894e-05	0.000241468	0.000402447	0.000845138	0.000281713	0.000482936	0.000563426	0.000120734	8.04894e-05	0	0.000281713	0.000241468	0.000362202	0.000120734	0	0	0.00132807	0.00068416	0.00128783	0.00060367	0.000281713	0.000362202	0.000281713	0.000362202	0.000523181	0.000120734	0.000201223	0.000442692	4.02447e-05	0	0	0.000160979	4.02447e-05	0.000281713	0	4.02447e-05	0
OTU_194	k__Bacteria; p__Cyanobacteria; c__Chloroplast; o__Stramenopiles; f__; g__; s__	8.04894e-05	0.000201223	0.000160979	0.000160979	0.000281713	0.000281713	0.000281713	0.000120734	0.000281713	0.000482936	0.000563426	0.00128783	0.000120734	0.000281713	0.000120734	0.000362202	0.000201223	0.000442692	4.02447e-05	4.02447e-05	0	0.000241468	0.000321958	0.000160979	4.02447e-05	0	0.000120734	0.000281713	8.04894e-05	0.000160979	0.000160979	0.000241468	0.000120734	0.000201223	8.04894e-05	0.000160979	0.000321958	0.000241468	0.000321958	0.000201223	0.000845138	0.000402447	0.0018915	0.000563426	0.00108661	0.000281713	0.000160979	0.000201223
OTU_236	k__Bacteria; p__Proteobacteria; c__Betaproteobacteria; o__Methylophilales	0.00068416	0.000724404	0.000482936	0.000362202	0.00104636	0.000804894	0.000160979	0.000160979	0.000241468	0	0	0	0.00060367	0.00068416	0.000925628	0.000160979	0.000201223	0.000160979	0.000482936	0.000523181	0.0011671	0.000120734	0	0	0	4.02447e-05	0	0.000201223	0.000241468	0	4.02447e-05	0	4.02447e-05	8.04894e-05	8.04894e-05	8.04894e-05	0.000120734	8.04894e-05	4.02447e-05	0.000321958	0.000442692	0.000281713	4.02447e-05	0	0	0.000563426	0.00060367	0.000442692
OTU_18942	k__Bacteria; p__Proteobacteria; c__Gammaproteobacteria; o__Xanthomonadales; f__Xanthomonadaceae; g__; s__	8.04894e-05	0.000241468	4.02447e-05	0.000160979	0.000764649	0.000201223	8.04894e-05	0.000201223	0.000321958	0	0.000120734	4.02447e-05	0	0.000160979	0.000120734	0.000160979	0.000362202	0.000241468	0.000402447	0.000362202	0.000201223	0.000362202	0.000523181	0.000523181	0.00120734	0.00169028	0.00128783	0.000362202	0.0011671	0.000482936	0.000160979	0.000160979	4.02447e-05	0.000241468	0.000643915	8.04894e-05	0	0.000120734	8.04894e-05	4.02447e-05	4.02447e-05	0.000120734	8.04894e-05	8.04894e-05	0	4.02447e-05	4.02447e-05	0
OTU_255	k__Bacteria; p__Planctomycetes; c__Planctomycetia; o__Planctomycetales; f__Planctomycetaceae; g__Planctomyces; s__	0.000523181	0.000643915	0.000643915	0.000482936	0.00068416	0.000281713	0.000281713	0.000201223	0.00060367	4.02447e-05	4.02447e-05	0	8.04894e-05	0.000563426	0.000362202	0.000241468	0.000402447	0.000804894	4.02447e-05	0.000201223	0	0.000321958	0.000241468	0.000160979	0.00128783	0.00108661	0.00104636	0.000563426	0.000563426	0.000724404	0.000241468	8.04894e-05	4.02447e-05	0.000201223	0.000120734	4.02447e-05	0.000120734	0.000362202	0.000160979	0	0	0	4.02447e-05	0	8.04894e-05	4.02447e-05	4.02447e-05	0
OTU_248	k__Bacteria; p__Nitrospirae; c__Nitrospira; o__Nitrospirales; f__Nitrospiraceae; g__Nitrospira; s__	0.000281713	0.000362202	0.000442692	0.000281713	0.000120734	0.000281713	0.000160979	0.000281713	0.000281713	0	0	0	0.000120734	8.04894e-05	0.000160979	0.000201223	0.000201223	0.000281713	0	4.02447e-05	0	0	0	0	0	0	4.02447e-05	0.000120734	0.000281713	8.04894e-05	0.000241468	0.000120734	4.02447e-05	0.000160979	8.04894e-05	0.000120734	0.00213297	0.00249517	0.00241468	8.04894e-05	4.02447e-05	4.02447e-05	0.000845138	0.000764649	0.00060367	0.000241468	8.04894e-05	4.02447e-05
OTU_259	k__Bacteria; p__Proteobacteria; c__Gammaproteobacteria; o__Alteromonadales; f__OM60; g__; s__	8.04894e-05	0.000201223	0.000160979	0.000885383	0.00124759	0.000241468	0.000321958	0.000442692	0.000482936	4.02447e-05	4.02447e-05	0	8.04894e-05	0.000321958	0.000281713	0.000442692	0.000885383	0.000764649	0	4.02447e-05	0	0.000201223	0.000321958	0.000321958	0.000482936	0.000281713	0.00068416	0.000804894	0.000643915	0.000845138	0.000523181	0.000160979	0.000120734	8.04894e-05	0.000281713	4.02447e-05	8.04894e-05	8.04894e-05	4.02447e-05	0	0	0	8.04894e-05	0	4.02447e-05	4.02447e-05	0	0.000120734
OTU_20100	k__Bacteria; p__Bacteroidetes; c__Flavobacteriia; o__Flavobacteriales; f__Cryomorphaceae; g__Fluviicola; s__	8.04894e-05	4.02447e-05	4.02447e-05	4.02447e-05	8.04894e-05	4.02447e-05	0	0	8.04894e-05	0.000241468	0.000201223	0.000120734	0	4.02447e-05	8.04894e-05	0.000120734	0.000120734	4.02447e-05	0	8.04894e-05	0	0.0030586	0.0030586	0.00253542	0.000120734	0.000160979	0.000160979	0	4.02447e-05	4.02447e-05	0.000201223	0.000201223	4.02447e-05	8.04894e-05	0	4.02447e-05	8.04894e-05	0	0	4.02447e-05	0	0	0.000120734	0	0	0	4.02447e-05	0
OTU_264	k__Bacteria; p__Proteobacteria; c__Alphaproteobacteria; o__Rhizobiales; f__Methylobacteriaceae; g__Methylobacterium; s__	0.000402447	8.04894e-05	4.02447e-05	0.000241468	4.02447e-05	0	0	4.02447e-05	0	8.04894e-05	4.02447e-05	0	0	0	0	4.02447e-05	0	0	0.000160979	4.02447e-05	4.02447e-05	0	0	0	0.00140856	0.000321958	8.04894e-05	0	0.0026159	8.04894e-05	0.000201223	0.000201223	0.000201223	8.04894e-05	0.00120734	0.00112685	0.000764649	0.00144881	0.000402447	0.00193175	4.02447e-05	0.000120734	0.000201223	0	0.000120734	0.000563426	0.000201223	8.04894e-05
OTU_19888	k__Bacteria; p__Bacteroidetes; c__Flavobacteriia; o__Flavobacteriales; f__Flavobacteriaceae; g__Flavobacterium; s__	0.000402447	8.04894e-05	0.000160979	0.000201223	0.000160979	0.000201223	0.000120734	0.000120734	8.04894e-05	0.00060367	0.000321958	0.000563426	8.04894e-05	8.04894e-05	0.000120734	0.000201223	8.04894e-05	0.000160979	0.000120734	0.000120734	0.000321958	0.000965873	0.00108661	0.00136832	0.000402447	0.000160979	0.000482936	0.000160979	0.000321958	0.000160979	0.000442692	0.000160979	8.04894e-05	4.02447e-05	0.000201223	0.000120734	0.000120734	4.02447e-05	8.04894e-05	8.04894e-05	0.000120734	0.000160979	0.000241468	0.000120734	0.000241468	0.000402447	0.000281713	0.000160979
OTU_179	k__Bacteria; p__Actinobacteria; c__Actinobacteria; o__Actinomycetales; f__Nocardioidaceae; g__Nocardioides; s__	0.000160979	0.000160979	0	0.000120734	0.000362202	0.000241468	8.04894e-05	8.04894e-05	0.000321958	4.02447e-05	0.000160979	4.02447e-05	0.000241468	0.000523181	0.000120734	0.000160979	0.000120734	0.000281713	0.000241468	0.000241468	0.000281713	0.000402447	0.000160979	0.000120734	0.0015293	0.000643915	0.000885383	0.000482936	0.00060367	0.000402447	0.000201223	4.02447e-05	0.000120734	0.000523181	0.000442692	0.000402447	0.000241468	0.000402447	0.000241468	0.000201223	4.02447e-05	8.04894e-05	0.000321958	4.02447e-05	0.000160979	0.000120734	0.000160979	0.000120734
OTU_7868	k__Bacteria; p__Proteobacteria; c__Betaproteobacteria; o__Rhodocyclales; f__Rhodocyclaceae; g__C39; s__	0	0	0	0	0	0	4.02447e-05	0	0	8.04894e-05	0	0	0.000160979	0.000201223	0.000160979	0	0	4.02447e-05	0	8.04894e-05	8.04894e-05	0.0018915	0.00173052	0.00245493	0	0	0	8.04894e-05	4.02447e-05	0	4.02447e-05	8.04894e-05	0	8.04894e-05	0	4.02447e-05	0	0	0	8.04894e-05	8.04894e-05	0	0	0	0	0.000482936	0.000523181	0.000402447
OTU_272	k__Bacteria; p__Cyanobacteria; c__Oscillatoriophycideae; o__Oscillatoriales; f__Phormidiaceae; g__; s__	0	8.04894e-05	8.04894e-05	0.000160979	0.000362202	8.04894e-05	0	0	4.02447e-05	0	0	0	4.02447e-05	8.04894e-05	0	8.04894e-05	8.04894e-05	0.000281713	4.02447e-05	4.02447e-05	0	0.000845138	0.000724404	0.000563426	0.00209272	0.00293786	0.00370251	4.02447e-05	0.000563426	0.000362202	4.02447e-05	0.000120734	4.02447e-05	0.000362202	8.04894e-05	0	0	4.02447e-05	4.02447e-05	0	0	0	0.000160979	0	4.02447e-05	0	4.02447e-05	0
OTU_12290	k__Bacteria; p__Planctomycetes; c__Planctomycetia; o__Pirellulales; f__Pirellulaceae; g__; s__	0.00144881	0.00217321	0.00181101	0.000120734	0.000201223	0.000281713	0.000201223	0.000362202	0.000563426	0.000885383	0.00128783	0.00148905	0.000120734	0.000362202	0.000160979	0.000241468	0.000321958	0.000442692	0.000120734	0.000281713	4.02447e-05	0	4.02447e-05	0	0	0	0	0.000201223	4.02447e-05	8.04894e-05	4.02447e-05	4.02447e-05	0.000160979	0.000160979	8.04894e-05	0.000120734	0	8.04894e-05	0	4.02447e-05	0	4.02447e-05	0	0	0	0	0	0
OTU_237	k__Bacteria; p__Bacteroidetes; c__Sphingobacteriia; o__Sphingobacteriales; f__; g__; s__	0.00165003	0.000804894	0.00136832	0.000362202	0.000362202	0.000965873	0.000925628	0.000482936	0.0011671	0	0	0	0.000724404	0.000201223	0.000281713	0.000160979	0.00060367	0.000724404	0	8.04894e-05	0	0.000160979	8.04894e-05	4.02447e-05	4.02447e-05	0	0	0.000281713	0.000201223	4.02447e-05	0.000563426	0.000321958	0.000201223	0.000281713	8.04894e-05	0.000120734	4.02447e-05	4.02447e-05	0	0	0	4.02447e-05	8.04894e-05	4.02447e-05	0.000402447	0	0	8.04894e-05
OTU_17754	k__Bacteria; p__Actinobacteria; c__Actinobacteria; o__Actinomycetales; f__ACK-M1; g__; s__	0.000160979	4.02447e-05	4.02447e-05	0.000120734	4.02447e-05	0.000281713	0.000160979	0.000201223	0.000160979	0.000804894	0.00128783	0.000845138	0.000201223	4.02447e-05	0.000120734	0.000201223	0.000160979	0.000120734	0	8.04894e-05	0	0.000201223	0.000120734	8.04894e-05	0.000160979	0.000120734	8.04894e-05	0.000281713	4.02447e-05	4.02447e-05	0.000160979	8.04894e-05	0.000201223	0.000321958	0.000321958	0.000201223	0.000120734	0.000201223	0.000281713	0.000281713	0.000120734	0.000281713	0.000120734	0.000281713	0.000482936	0.000201223	0.000281713	0.000241468
OTU_187	k__Bacteria; p__Proteobacteria; c__Alphaproteobacteria; o__Sphingomonadales; f__Erythrobacteraceae; g__; s__	0.000643915	0.000482936	0.000965873	0.000241468	0.000402447	0.000482936	0.000241468	0.000281713	0.000523181	0	0	0	4.02447e-05	0.000362202	0.000442692	0.000160979	0.000362202	0.000201223	8.04894e-05	8.04894e-05	0	0.000120734	8.04894e-05	4.02447e-05	0	0.000120734	8.04894e-05	0.000281713	0.000362202	0.000643915	0.000241468	8.04894e-05	0.000201223	0.000201223	0.000120734	8.04894e-05	0.000925628	0.00104636	0.000724404	8.04894e-05	8.04894e-05	0	0.000482936	0.000362202	0.000482936	0.000160979	0.000201223	0.000120734
OTU_13060	k__Bacteria; p__Proteobacteria; c__Gammaproteobacteria; o__Xanthomonadales; f__Xanthomonadaceae; g__Luteimonas; s__	0.000281713	8.04894e-05	4.02447e-05	0.000160979	0.000321958	0.000120734	0.000160979	0.000201223	0.000160979	8.04894e-05	4.02447e-05	0	8.04894e-05	4.02447e-05	8.04894e-05	0.000201223	0.000241468	0.000160979	0.00173052	0.00104636	0.000764649	8.04894e-05	0.000120734	0.000241468	0.00104636	0.000885383	0.000845138	0.000482936	0.000321958	0.000563426	0.000281713	0.000241468	0.000120734	0.000321958	0.000321958	8.04894e-05	0.000120734	0.000120734	0.000201223	4.02447e-05	4.02447e-05	0	0.000160979	4.02447e-05	8.04894e-05	0.000120734	0.000281713	8.04894e-05
OTU_231	k__Bacteria; p__Proteobacteria; c__Alphaproteobacteria; o__Sphingomonadales; f__Sphingomonadaceae; g__Novosphingobium	0.00136832	0.000885383	0.00100612	0.000362202	0.000523181	0.000482936	0.000281713	8.04894e-05	0.000281713	0.00132807	0.000482936	0.00140856	0.000201223	0.000241468	0.000120734	0.000160979	0.000160979	0.000643915	0	0.000321958	0.000120734	0.000402447	0.000201223	0.000482936	8.04894e-05	0	0.000321958	0.000241468	8.04894e-05	0.000201223	4.02447e-05	0.000281713	0.000201223	0.000160979	4.02447e-05	4.02447e-05	0.000120734	4.02447e-05	0.000241468	0	8.04894e-05	0	8.04894e-05	4.02447e-05	0	0	0	4.02447e-05
OTU_243	k__Bacteria; p__Proteobacteria; c__Alphaproteobacteria; o__Rickettsiales; f__Rickettsiaceae; g__; s__	0.00060367	0.00068416	0.000402447	0.000241468	0.000281713	0.000362202	8.04894e-05	0.000120734	0.000241468	4.02447e-05	0	8.04894e-05	0.000120734	0.000241468	0	0.000120734	0.000201223	0.000241468	0	0	4.02447e-05	0.000201223	8.04894e-05	0.000160979	0	0	0	4.02447e-05	0.000120734	0.000160979	0.000201223	0.000160979	0.000120734	0.000321958	0.000321958	0.000281713	0.000563426	0.000643915	0.000804894	0.000402447	0.000523181	0.000402447	0.00177077	0.000643915	0.00120734	0.000241468	0.000201223	4.02447e-05
OTU_5065	k__Bacteria; p__Actinobacteria; c__Acidimicrobiia; o__Acidimicrobiales; f__C111; g__; s__	0	0.000201223	0.000160979	0.00128783	0.00108661	0.00221346	0.000643915	0.000523181	0.00104636	0	0	4.02447e-05	0.000281713	0.000442692	0.000482936	0.00060367	0.000281713	0.000201223	0	4.02447e-05	8.04894e-05	0	4.02447e-05	4.02447e-05	0	0	0	0.000523181	0.000281713	0.000402447	0.000241468	0.000523181	0.000241468	0.000160979	0.000281713	0.000362202	0.000160979	8.04894e-05	0.000201223	4.02447e-05	0	8.04894e-05	8.04894e-05	8.04894e-05	4.02447e-05	4.02447e-05	4.02447e-05	8.04894e-05
OTU_13067	k__Bacteria; p__Proteobacteria; c__Gammaproteobacteria; o__Pseudomonadales; f__Moraxellaceae; g__Acinetobacter; s__johnsonii	4.02447e-05	0.000120734	4.02447e-05	4.02447e-05	8.04894e-05	4.02447e-05	4.02447e-05	0	0	0	0	4.02447e-05	8.04894e-05	0.00551352	0.000563426	0	0	4.02447e-05	0.000160979	0	0.00382325	0	4.02447e-05	0	0.000241468	0.000120734	0.000201223	0.000804894	0	0	0	4.02447e-05	4.02447e-05	0.000120734	8.04894e-05	0.000120734	0	0	4.02447e-05	8.04894e-05	4.02447e-05	8.04894e-05	0.000402447	0	0	4.02447e-05	0	0.000482936
OTU_3844	k__Bacteria; p__Bacteroidetes; c__[Saprospirae]; o__[Saprospirales]; f__Chitinophagaceae; g__Sediminibacterium; s__	0.000201223	0.000523181	0.000201223	0.000402447	4.02447e-05	0.000321958	0.000321958	0.000281713	0.000120734	0.000804894	0.00144881	0.000965873	8.04894e-05	4.02447e-05	8.04894e-05	0.000201223	4.02447e-05	0.000241468	4.02447e-05	8.04894e-05	0.000120734	0.000362202	0.000160979	0.000482936	0.000241468	0	0.000241468	0.000201223	4.02447e-05	8.04894e-05	4.02447e-05	4.02447e-05	0.000160979	0.000201223	0.000160979	0.000160979	0	0	0.000120734	8.04894e-05	0	8.04894e-05	4.02447e-05	0	0	0	0	0
OTU_269	k__Bacteria; p__Planctomycetes; c__Phycisphaerae; o__Phycisphaerales; f__; g__; s__	0.000120734	0.000160979	0.000201223	0.000563426	0.000241468	0.000845138	0.000643915	0.000563426	0.00136832	0	0	0	0.000442692	4.02447e-05	0.000643915	0.000442692	0.000402447	0.000845138	0	0.000120734	0	0	8.04894e-05	0	0	0	0	0.00060367	0.000563426	0.000281713	0.000523181	0.000482936	0.000281713	0.000482936	0.000402447	0.000321958	0.000281713	0.000402447	8.04894e-05	0	0	8.04894e-05	0.000160979	0.000281713	0.000643915	4.02447e-05	4.02447e-05	4.02447e-05
OTU_261	k__Bacteria; p__Actinobacteria; c__Thermoleophilia; o__Gaiellales; f__; g__; s__	0.000442692	0.00177077	0.000845138	8.04894e-05	0.000241468	0.000201223	0.000281713	0.000281713	0.000885383	0	0	0	0.000321958	0.000925628	0.000442692	0.000442692	0.000482936	0.000321958	4.02447e-05	0.000120734	8.04894e-05	0.000563426	0.000442692	0.000281713	0	0	0	0.000482936	0.00068416	0.000563426	0.000321958	0.000201223	0.000201223	0.000120734	8.04894e-05	0.000281713	4.02447e-05	4.02447e-05	8.04894e-05	0	4.02447e-05	4.02447e-05	0	0	0	0	0	0
OTU_20	k__Bacteria; p__Chlorobi; c__OPB56; o__; f__; g__; s__	0.000362202	0.000160979	0.000321958	8.04894e-05	0.000201223	0.000120734	0.000160979	0.000402447	0.000241468	0	0	0	4.02447e-05	8.04894e-05	0.000120734	0.000160979	0.000120734	0.000241468	0	0.000281713	4.02447e-05	8.04894e-05	0.000241468	0.000160979	0	0	4.02447e-05	0.000120734	4.02447e-05	8.04894e-05	8.04894e-05	8.04894e-05	4.02447e-05	0.000442692	8.04894e-05	0.000362202	0.00108661	0.000845138	0.00120734	0.000563426	0.000402447	0.000362202	0.00100612	0.000845138	0.00104636	0.000160979	8.04894e-05	0.000241468
OTU_304	k__Bacteria; p__Proteobacteria; c__Gammaproteobacteria; o__Enterobacteriales; f__Enterobacteriaceae; g__Yersinia; s__	0.000442692	0.000402447	0.000362202	8.04894e-05	0.00060367	0.000402447	8.04894e-05	0.000120734	0.000281713	0	4.02447e-05	0	0.000160979	0.00068416	0.000201223	4.02447e-05	0.000160979	0.000201223	4.02447e-05	4.02447e-05	0	0	4.02447e-05	4.02447e-05	0.00265615	0.00124759	0.00313909	8.04894e-05	0.000402447	0.000362202	0.000160979	0.000201223	4.02447e-05	0.000120734	8.04894e-05	0.000160979	0	0	8.04894e-05	0	4.02447e-05	0	0	0	0	0	4.02447e-05	0
OTU_206	k__Bacteria; p__Cyanobacteria; c__Chloroplast; o__Stramenopiles; f__; g__; s__	4.02447e-05	0	0.000120734	4.02447e-05	0.000120734	8.04894e-05	8.04894e-05	8.04894e-05	0	0	0	4.02447e-05	0	0	0	4.02447e-05	8.04894e-05	0.000281713	0	0	4.02447e-05	0.000160979	0.000201223	4.02447e-05	0	0	4.02447e-05	0.000160979	4.02447e-05	4.02447e-05	0.000201223	8.04894e-05	0.000120734	0.000160979	0	0.000120734	0.000201223	0.000201223	0.000804894	0	4.02447e-05	4.02447e-05	0.000362202	0	4.02447e-05	0.000482936	0.000402447	0.000281713
OTU_207	k__Bacteria; p__Verrucomicrobia; c__Verrucomicrobiae; o__Verrucomicrobiales; f__Verrucomicrobiaceae; g__Luteolibacter; s__	0	0	0	0	8.04894e-05	4.02447e-05	0	4.02447e-05	0	0.00474887	0.00354153	0.00478912	0	0	0	0	0	4.02447e-05	0	0	0	0	0	0	0	0	4.02447e-05	0	0	4.02447e-05	8.04894e-05	0	0	4.02447e-05	0	0	0	0	0	0	4.02447e-05	0	0	0	0	0	0	0
OTU_19959	k__Bacteria; p__Proteobacteria; c__Gammaproteobacteria; o__Enterobacteriales; f__Enterobacteriaceae	8.04894e-05	8.04894e-05	0.000120734	0.000281713	0.000563426	0.000362202	8.04894e-05	4.02447e-05	0	0.000402447	0.000120734	4.02447e-05	0.000241468	0.000321958	0.000160979	8.04894e-05	4.02447e-05	0.000120734	0.000804894	0.0011671	0.000804894	0.000201223	0.000160979	8.04894e-05	0.00249517	0.000201223	0.00108661	4.02447e-05	0.000160979	8.04894e-05	8.04894e-05	0.000160979	8.04894e-05	0.000120734	8.04894e-05	0.000120734	0.000281713	0.000120734	4.02447e-05	0.000120734	0.000241468	0.000281713	0.000120734	0	8.04894e-05	0.000160979	0.000120734	0.000160979
OTU_1912	k__Bacteria; p__Cyanobacteria; c__Chloroplast; o__Stramenopiles; f__; g__; s__	4.02447e-05	8.04894e-05	0.000120734	0.000925628	0.00156954	0.000764649	0.000281713	0.000804894	0.00068416	0.000120734	0	0	4.02447e-05	4.02447e-05	0.000160979	0.000321958	0.00060367	0.000523181	0	0.000120734	0	0.00060367	0.00136832	0.00068416	4.02447e-05	0.000201223	0.000160979	0.000724404	0.000120734	0.000120734	8.04894e-05	8.04894e-05	0	0.000201223	0.000201223	0.000201223	0.000201223	0.000160979	0.000160979	0.000160979	4.02447e-05	8.04894e-05	8.04894e-05	0.000120734	0	0	0.000120734	8.04894e-05
OTU_341	k__Bacteria; p__Chlorobi; c__OPB56; o__; f__; g__; s__	8.04894e-05	0.000120734	8.04894e-05	8.04894e-05	4.02447e-05	4.02447e-05	0	8.04894e-05	0.000160979	4.02447e-05	4.02447e-05	0	4.02447e-05	8.04894e-05	0	8.04894e-05	0.000201223	0.000281713	0.000281713	0.00221346	0.000925628	0.000120734	0.000241468	0.000321958	8.04894e-05	8.04894e-05	0	8.04894e-05	4.02447e-05	8.04894e-05	0.000362202	0.000160979	0.000201223	0.000965873	0.000523181	0.000845138	0.000281713	0.000402447	0.000402447	0.000241468	0.000160979	8.04894e-05	0.000241468	0.000241468	0.000201223	8.04894e-05	4.02447e-05	0.000160979
OTU_246	k__Bacteria; p__Actinobacteria; c__Actinobacteria; o__Actinomycetales; f__Microbacteriaceae; g__Yonghaparkia; s__	4.02447e-05	8.04894e-05	0.000120734	0	4.02447e-05	8.04894e-05	8.04894e-05	0.000160979	8.04894e-05	4.02447e-05	8.04894e-05	4.02447e-05	8.04894e-05	0.000281713	4.02447e-05	4.02447e-05	8.04894e-05	8.04894e-05	0.000201223	0.000201223	0.000160979	0.000241468	0.000120734	8.04894e-05	0.000724404	0.00124759	0.00128783	0.000643915	0.000321958	0.000442692	0.000160979	0.000201223	0.000804894	0.000160979	0.000362202	0.000321958	8.04894e-05	0.000321958	0.000201223	0.000120734	0.000120734	8.04894e-05	0.00144881	0.000160979	8.04894e-05	0.000281713	0.000160979	0.000362202
OTU_12762	k__Bacteria; p__Cyanobacteria; c__Chloroplast; o__Stramenopiles; f__; g__; s__	4.02447e-05	4.02447e-05	0.000120734	0.00160979	0.000362202	0.000442692	0.000201223	0.00068416	0.000764649	4.02447e-05	8.04894e-05	4.02447e-05	0.000321958	4.02447e-05	0.000442692	0.000523181	0.000241468	0.000362202	0	0	0	0	0.000201223	4.02447e-05	0	4.02447e-05	0	0.000442692	0.000160979	0.000120734	0.00060367	0.000321958	0.000362202	0.000925628	0.000482936	0.00128783	0.000281713	0.000402447	0.000402447	4.02447e-05	0	4.02447e-05	0.000362202	0.000120734	8.04894e-05	0	4.02447e-05	0
OTU_18961	k__Bacteria; p__Proteobacteria; c__Gammaproteobacteria; o__Xanthomonadales; f__Xanthomonadaceae; g__Lysobacter; s__	4.02447e-05	4.02447e-05	4.02447e-05	8.04894e-05	0.000120734	8.04894e-05	0	4.02447e-05	4.02447e-05	0.000160979	0	4.02447e-05	4.02447e-05	0.000362202	0.000160979	4.02447e-05	4.02447e-05	8.04894e-05	0.00068416	0.000643915	0.000402447	0.000281713	0.000362202	0	0.00148905	0.00120734	0.000442692	0.000281713	0.000482936	0.000724404	4.02447e-05	4.02447e-05	0.000241468	4.02447e-05	0.000321958	0.000362202	0	0.000442692	0.000120734	0.000442692	0.000160979	0	0.000442692	0.000362202	4.02447e-05	0.000523181	4.02447e-05	0.000362202
OTU_9	k__Bacteria; p__Proteobacteria; c__Betaproteobacteria; o__Neisseriales; f__Neisseriaceae; g__Vogesella; s__	0	8.04894e-05	8.04894e-05	4.02447e-05	8.04894e-05	8.04894e-05	0	0	0	4.02447e-05	0	4.02447e-05	8.04894e-05	0.000523181	0	0.000120734	0	4.02447e-05	0.00394398	0.00124759	0.00354153	0	0	0.000120734	0	0.000281713	0	0.000241468	0.000120734	0	4.02447e-05	4.02447e-05	4.02447e-05	4.02447e-05	0	4.02447e-05	0	0	0	4.02447e-05	0	0	4.02447e-05	0	0	0.000965873	0.000362202	0.00068416
OTU_2448	k__Bacteria; p__Actinobacteria; c__Actinobacteria; o__Actinomycetales; f__Microbacteriaceae; g__Clavibacter; s__	0	0.000120734	8.04894e-05	8.04894e-05	4.02447e-05	0	4.02447e-05	4.02447e-05	0	0.000442692	0.000643915	0.000321958	4.02447e-05	8.04894e-05	0.000160979	0.000120734	8.04894e-05	8.04894e-05	4.02447e-05	8.04894e-05	0	0.000965873	0.00108661	0.00128783	0.00068416	0.000724404	0.000804894	4.02447e-05	0.000120734	4.02447e-05	0	0.000160979	8.04894e-05	0	4.02447e-05	0	4.02447e-05	4.02447e-05	4.02447e-05	0	0	0	8.04894e-05	4.02447e-05	0	0.000201223	8.04894e-05	0.000120734
OTU_247	k__Bacteria; p__Proteobacteria; c__Deltaproteobacteria; o__Myxococcales; f__OM27; g__; s__	0.000201223	4.02447e-05	0.000160979	8.04894e-05	0	4.02447e-05	0	0.000160979	0	0	0	4.02447e-05	4.02447e-05	0	4.02447e-05	8.04894e-05	0.000241468	8.04894e-05	0	0	0	4.02447e-05	0	4.02447e-05	0	0	4.02447e-05	4.02447e-05	0	0	0	0	8.04894e-05	8.04894e-05	8.04894e-05	0	0.000643915	0.000643915	0.00068416	4.02447e-05	0.000120734	0.000201223	0.00229395	0.00120734	0.00330006	0.000201223	0.000643915	0.000523181
OTU_13994	k__Bacteria; p__Proteobacteria; c__Betaproteobacteria; o__Burkholderiales; f__Comamonadaceae	8.04894e-05	4.02447e-05	0.000201223	0.000120734	0.000321958	0.000523181	0.000120734	8.04894e-05	4.02447e-05	0.000120734	0	0.000120734	0.000241468	0.000321958	0.000362202	0.000120734	8.04894e-05	0.000160979	8.04894e-05	0.000241468	0.000160979	8.04894e-05	0.000241468	4.02447e-05	0.00144881	0.0011671	0.00209272	0.000281713	0.00068416	0.000482936	4.02447e-05	8.04894e-05	0.000362202	0.000120734	0.000160979	0.000120734	8.04894e-05	8.04894e-05	0.000442692	0.000120734	4.02447e-05	0.000120734	8.04894e-05	4.02447e-05	0	8.04894e-05	0.000120734	0.000160979
OTU_258	k__Bacteria; p__Planctomycetes; c__Planctomycetia; o__Gemmatales; f__Gemmataceae; g__; s__	0.000482936	0.000764649	0.00108661	0.000643915	0.000482936	0.000442692	0.000160979	0.000281713	0.000442692	0	4.02447e-05	0	0.000120734	0.000523181	0.000321958	0.000321958	0.000523181	0.000281713	8.04894e-05	4.02447e-05	4.02447e-05	0	0	0	0.000845138	0.000362202	0.0011671	0.000201223	0.000201223	0.000442692	0.000442692	0.000201223	0.000321958	0.000201223	0.000321958	0.000321958	0.000160979	0.000241468	0.000120734	0.000120734	0	0	0.000120734	4.02447e-05	4.02447e-05	4.02447e-05	0	0
OTU_266	k__Bacteria; p__Proteobacteria; c__Betaproteobacteria; o__; f__; g__; s__	0.000281713	0.000120734	0.000201223	0.000120734	0.000442692	0.000201223	0.000442692	0.000362202	0.000241468	4.02447e-05	0	0	0.000160979	4.02447e-05	0.000321958	0.000201223	0.000482936	0.000241468	4.02447e-05	4.02447e-05	0	8.04894e-05	8.04894e-05	4.02447e-05	0	0	0	4.02447e-05	8.04894e-05	0.000160979	0.000160979	8.04894e-05	0.000120734	0.000402447	0.000120734	0.000201223	0.000885383	0.000925628	0.000563426	0.000241468	0.000201223	0.000281713	0.000643915	0.000764649	0.00140856	0.000321958	0.000402447	0.000482936
OTU_4	k__Bacteria; p__Actinobacteria; c__Actinobacteria; o__Actinomycetales; f__ACK-M1; g__; s__	0.000160979	0.000201223	8.04894e-05	0.000201223	0.000160979	0.000201223	0.000120734	0.000201223	0.000120734	0.00104636	0.00136832	0.000362202	0.000201223	0	8.04894e-05	0.000160979	4.02447e-05	0.000281713	8.04894e-05	8.04894e-05	0.000120734	4.02447e-05	0.000160979	0	0.000201223	0.000120734	8.04894e-05	4.02447e-05	0.000201223	0.000120734	0.000321958	0.000281713	0.000201223	0.000241468	0.000201223	0.000201223	8.04894e-05	0.000120734	4.02447e-05	0.000201223	0.000160979	0.000241468	0.000120734	0.000241468	0.000362202	8.04894e-05	4.02447e-05	0.000120734
OTU_249	k__Bacteria; p__Proteobacteria; c__Gammaproteobacteria; o__Pseudomonadales; f__Pseudomonadaceae; g__; s__	0.000281713	0.000402447	4.02447e-05	0.000402447	0.000724404	8.04894e-05	0.000120734	8.04894e-05	0.000241468	0	4.02447e-05	0	0.000160979	0.000764649	0.000724404	0.000120734	0.00060367	0.000321958	0.000120734	0.000160979	0.000281713	4.02447e-05	4.02447e-05	0.000120734	8.04894e-05	0.000201223	0.000201223	0.00148905	0.000321958	0.000482936	0.000160979	0.000321958	8.04894e-05	8.04894e-05	0.000201223	0.000160979	0.000160979	8.04894e-05	0.000201223	0	4.02447e-05	4.02447e-05	4.02447e-05	0.000120734	8.04894e-05	0.000120734	0.000120734	8.04894e-05
OTU_13408	k__Bacteria; p__Proteobacteria; c__Alphaproteobacteria; o__Sphingomonadales; f__; g__; s__	0.000362202	0.000482936	0.000804894	0.000321958	0.000482936	0.000201223	0.000321958	0.000241468	0.000120734	0.000442692	0.000241468	0.000321958	8.04894e-05	4.02447e-05	0.000201223	0.000160979	0.000241468	0.000402447	0.000362202	0.000442692	0.000442692	8.04894e-05	0.000120734	0.000201223	0.000965873	0.000241468	0.00144881	0.000160979	0.000442692	0.000402447	0.000160979	0.000120734	0	4.02447e-05	8.04894e-05	0	0.000201223	0.000120734	0.000160979	8.04894e-05	8.04894e-05	0.000241468	0.000201223	4.02447e-05	0.000120734	8.04894e-05	4.02447e-05	0
OTU_12886	k__Bacteria; p__Proteobacteria; c__Gammaproteobacteria; o__Xanthomonadales; f__Sinobacteraceae; g__; s__	0	8.04894e-05	4.02447e-05	8.04894e-05	0	8.04894e-05	0.000160979	0.000120734	0.000120734	0	4.02447e-05	0	4.02447e-05	0	8.04894e-05	0.000160979	0.000120734	0	4.02447e-05	8.04894e-05	0.000160979	4.02447e-05	0	8.04894e-05	0	4.02447e-05	0	8.04894e-05	8.04894e-05	4.02447e-05	0.000281713	4.02447e-05	0.000120734	0.000281713	0.000201223	0.000241468	0.000845138	0.000764649	0.000643915	0.000643915	0.000402447	0.000885383	0.000724404	0.00100612	0.00140856	0.000281713	0.000563426	0.000523181
OTU_20382	k__Bacteria; p__Bacteroidetes; c__[Saprospirae]; o__[Saprospirales]; f__Chitinophagaceae; g__Sediminibacterium; s__	0.000281713	0.000281713	0.000563426	8.04894e-05	0.000201223	8.04894e-05	8.04894e-05	0.000321958	0	0.000965873	0.00112685	0.0011671	4.02447e-05	4.02447e-05	4.02447e-05	0.000321958	0.000201223	0.000160979	0	8.04894e-05	0	0.000321958	0.000281713	0.000442692	0.000160979	4.02447e-05	8.04894e-05	0	0.000120734	0.000241468	8.04894e-05	8.04894e-05	4.02447e-05	8.04894e-05	8.04894e-05	0.000160979	4.02447e-05	0	4.02447e-05	0	4.02447e-05	8.04894e-05	0	0	8.04894e-05	0	0	0
OTU_13672	k__Bacteria; p__Proteobacteria; c__Betaproteobacteria; o__Methylophilales; f__Methylophilaceae; g__; s__	0	0	0	0	4.02447e-05	0	0	0	4.02447e-05	0	0	4.02447e-05	0	0	0	0	0	0	0	4.02447e-05	0	0	4.02447e-05	0	0	0	0	0	4.02447e-05	0	0	8.04894e-05	0	0	0	0	0	0	0	0	0	0	0	0	0	4.02447e-05	0	0
OTU_276	k__Bacteria; p__Proteobacteria; c__Gammaproteobacteria; o__Alteromonadales; f__HTCC2188; g__HTCC; s__	0.000241468	8.04894e-05	0.000201223	0.000241468	4.02447e-05	4.02447e-05	0.000160979	0.000241468	0.000281713	0.000120734	8.04894e-05	0.000201223	0.000120734	0.000120734	0.000160979	0.000120734	0.000160979	0.000281713	0	4.02447e-05	8.04894e-05	0.000442692	0.000563426	0.000442692	4.02447e-05	8.04894e-05	4.02447e-05	4.02447e-05	4.02447e-05	8.04894e-05	0.000281713	8.04894e-05	0.000321958	0.000281713	0.000160979	0.000442692	0.000321958	0.000201223	0.000241468	0	4.02447e-05	0	0.000321958	0.000281713	0.000523181	0.000201223	0	8.04894e-05
OTU_12841	k__Bacteria; p__Proteobacteria; c__Betaproteobacteria; o__Rhodocyclales; f__Rhodocyclaceae; g__Dechloromonas; s__	0	8.04894e-05	0.000120734	0.000160979	0.000362202	0.000120734	0	0.000120734	4.02447e-05	8.04894e-05	8.04894e-05	8.04894e-05	4.02447e-05	0.000281713	0.000160979	0.000120734	0.000120734	8.04894e-05	8.04894e-05	0	4.02447e-05	0.000321958	0.000281713	0.000402447	0.00100612	0.00128783	0.00136832	0.000321958	0.000764649	0.000321958	0.000160979	8.04894e-05	8.04894e-05	0.000160979	0.000362202	4.02447e-05	4.02447e-05	4.02447e-05	0.000241468	0.000120734	4.02447e-05	4.02447e-05	0	0	4.02447e-05	0.000160979	0.000281713	0.000281713
OTU_253	k__Bacteria; p__Actinobacteria; c__Actinobacteria; o__Actinomycetales; f__; g__; s__	0.000160979	0.000321958	0.000402447	0	0.000120734	0	0.000160979	0.000241468	8.04894e-05	8.04894e-05	0	4.02447e-05	8.04894e-05	0.000120734	0.000120734	0	0.000120734	0.000201223	0.000442692	0.00060367	0.000120734	4.02447e-05	0.000201223	0.000120734	0.000120734	0.000201223	0.000160979	0.000160979	0.000120734	8.04894e-05	4.02447e-05	0.000281713	0	0.000160979	0.000120734	0.000241468	0.000724404	0.000442692	0.000201223	4.02447e-05	0	0	0.000160979	8.04894e-05	0.000120734	0.000241468	8.04894e-05	4.02447e-05
OTU_232	k__Bacteria; p__Cyanobacteria; c__Chloroplast; o__Chlorophyta; f__Chlamydomonadaceae; g__; s__	4.02447e-05	8.04894e-05	0	0	0	4.02447e-05	0	0	4.02447e-05	0	0	0	0	4.02447e-05	4.02447e-05	4.02447e-05	4.02447e-05	0	0	0	0	0	0	8.04894e-05	0	0	0	0	0	4.02447e-05	0	0	0	0	0	0	0.00169028	0.00169028	0.00128783	0.00156954	0.0011671	0.000523181	0.00249517	0.000281713	0.000563426	0.000160979	0.000241468	0.000120734
OTU_7773	k__Bacteria; p__Proteobacteria; c__Alphaproteobacteria; o__Sphingomonadales; f__; g__; s__	0.000120734	0.000160979	0.000201223	0.000362202	0.000442692	0.000281713	0.000241468	0.000241468	0.000241468	4.02447e-05	4.02447e-05	0	0.000201223	0.000563426	0.000321958	0.000201223	0.000241468	0.000201223	0.000120734	0.000120734	8.04894e-05	0.000362202	0.000442692	0.000201223	0.00104636	0.000965873	0.00100612	0.000120734	0.000281713	0.000643915	0.000402447	0.000523181	0.000402447	0.000241468	0.000160979	0.000241468	0	4.02447e-05	0.000201223	4.02447e-05	0.000120734	0	0	0	0	0	4.02447e-05	4.02447e-05
OTU_257	k__Bacteria; p__Cyanobacteria; c__Chloroplast; o__Chlorophyta; f__; g__; s__	0.000201223	0.000362202	0.000241468	4.02447e-05	0.000120734	4.02447e-05	4.02447e-05	4.02447e-05	0.000442692	0	0	0	8.04894e-05	4.02447e-05	4.02447e-05	8.04894e-05	0.000241468	8.04894e-05	0	0.000120734	0	4.02447e-05	0.000241468	0	8.04894e-05	8.04894e-05	8.04894e-05	0.000120734	8.04894e-05	8.04894e-05	0.000402447	0.000241468	0.000241468	0.000160979	0.000321958	0.000241468	0.00160979	0.00132807	0.00160979	0.000402447	0.000160979	0.000241468	0.000724404	0.000160979	0.000281713	0.000523181	0.000241468	0.000201223
OTU_14122	k__Bacteria; p__Proteobacteria; c__Betaproteobacteria; o__Burkholderiales; f__Alcaligenaceae; g__; s__	0.00060367	0.00132807	0.00068416	0.000362202	0.000643915	0.000402447	0.000402447	0.000482936	0.000925628	8.04894e-05	4.02447e-05	4.02447e-05	0.000160979	0.000281713	0.000482936	0.000321958	0.000362202	0.000321958	8.04894e-05	0	4.02447e-05	0.000120734	0	4.02447e-05	8.04894e-05	0.000160979	0	0.000241468	0.000402447	0.000120734	0.000321958	0.000160979	4.02447e-05	0.000241468	0.000160979	0.000362202	4.02447e-05	0.000201223	0.000120734	8.04894e-05	8.04894e-05	8.04894e-05	4.02447e-05	4.02447e-05	0.000160979	8.04894e-05	4.02447e-05	4.02447e-05
OTU_280	k__Bacteria; p__Bacteroidetes; c__[Saprospirae]; o__[Saprospirales]; f__Chitinophagaceae; g__Flavisolibacter; s__	0.000120734	0.000160979	0.000201223	0.000442692	0.000523181	0.000362202	0.000241468	0.000201223	0.00060367	0.000201223	8.04894e-05	0.000201223	0	0.000241468	0.000201223	0.000241468	8.04894e-05	0.000402447	0.000201223	0.00112685	0.000241468	4.02447e-05	0.000160979	0.000241468	0.000241468	0.000321958	0.000160979	0.000281713	0.000201223	0.000281713	0.000120734	0.000241468	0.000201223	0.000201223	4.02447e-05	0.000160979	0.000241468	0.000160979	0.000362202	0.000160979	0.000321958	0.000160979	0.000120734	0.000160979	0.000241468	0.000160979	0	0.000201223
OTU_279	k__Bacteria; p__Proteobacteria; c__Betaproteobacteria; o__Rhodocyclales; f__Rhodocyclaceae; g__Methyloversatilis; s__	0	0	0	0.000321958	0.000160979	0	0.000160979	4.02447e-05	4.02447e-05	0	4.02447e-05	4.02447e-05	0.000120734	0	4.02447e-05	0	0.000120734	4.02447e-05	0	4.02447e-05	4.02447e-05	0	4.02447e-05	0	0	4.02447e-05	4.02447e-05	8.04894e-05	4.02447e-05	0	4.02447e-05	0	0	4.02447e-05	8.04894e-05	4.02447e-05	0.000160979	0.000120734	8.04894e-05	0	4.02447e-05	8.04894e-05	4.02447e-05	0	0	4.02447e-05	4.02447e-05	4.02447e-05
OTU_337	k__Bacteria; p__Cyanobacteria; c__Oscillatoriophycideae; o__Chroococcales; f__Xenococcaceae; g__; s__	0.000321958	0.000201223	0.000442692	0.000643915	0.0015293	4.02447e-05	0.000160979	0.000201223	0.000241468	4.02447e-05	4.02447e-05	8.04894e-05	4.02447e-05	4.02447e-05	8.04894e-05	8.04894e-05	0.000160979	0.000321958	8.04894e-05	8.04894e-05	4.02447e-05	0.000442692	0.0011671	0.00120734	8.04894e-05	4.02447e-05	0.000281713	0.000362202	0.000321958	0.000281713	4.02447e-05	0.000120734	8.04894e-05	8.04894e-05	0.000160979	4.02447e-05	0.000241468	0.000120734	0.000160979	0.000201223	0	8.04894e-05	0.000362202	0.000281713	8.04894e-05	0.000241468	0.000120734	8.04894e-05
OTU_17875	k__Bacteria; p__Cyanobacteria; c__Chloroplast; o__Stramenopiles; f__; g__; s__	0.00060367	0.000402447	0.000402447	0.000281713	0.000241468	0.000724404	0.000281713	0.000201223	0.000281713	4.02447e-05	4.02447e-05	0	8.04894e-05	8.04894e-05	0.000201223	0.000201223	0.000201223	0.000402447	0	8.04894e-05	0	0.000724404	0.0011671	0.000523181	0	0	0.000120734	0.000120734	4.02447e-05	4.02447e-05	0.000362202	8.04894e-05	0.000362202	0.000321958	0.00068416	0.000241468	0.00060367	0.000321958	0.000523181	0	0.000201223	0.000120734	4.02447e-05	4.02447e-05	8.04894e-05	8.04894e-05	4.02447e-05	8.04894e-05
OTU_6401	k__Bacteria; p__Proteobacteria; c__Betaproteobacteria; o__Burkholderiales; f__Comamonadaceae	0.000321958	0.000482936	0.000321958	0.000160979	0.000120734	8.04894e-05	8.04894e-05	8.04894e-05	8.04894e-05	0.000281713	0.000120734	0	0.000402447	0.000321958	0.000160979	8.04894e-05	0.000120734	4.02447e-05	0.000241468	8.04894e-05	0.000241468	0.000120734	0.00060367	0.000281713	0.000281713	0.000281713	0	8.04894e-05	8.04894e-05	0.000160979	0.000241468	0.000120734	4.02447e-05	0.000120734	4.02447e-05	8.04894e-05	0.000160979	0.000120734	8.04894e-05	0.000241468	0.000160979	0.000482936	8.04894e-05	0.000160979	4.02447e-05	0.00120734	0.00112685	0.000482936
OTU_297	k__Bacteria; p__Proteobacteria; c__Alphaproteobacteria; o__Rhizobiales; f__; g__; s__	0	8.04894e-05	0.000201223	0.000201223	0.000321958	0.000120734	0.000160979	8.04894e-05	0.000160979	8.04894e-05	4.02447e-05	4.02447e-05	4.02447e-05	0.000160979	4.02447e-05	0.000120734	0.000321958	0.000442692	0.000201223	8.04894e-05	4.02447e-05	8.04894e-05	0.000120734	4.02447e-05	0.0011671	0.00136832	0.00165003	0.000523181	0.000885383	0.000764649	0.000281713	8.04894e-05	0.000201223	0.000241468	0.000321958	4.02447e-05	4.02447e-05	0.000241468	0.000321958	0	0	4.02447e-05	0.000120734	4.02447e-05	8.04894e-05	0	0	0.000120734
OTU_285	k__Bacteria; p__Proteobacteria; c__Alphaproteobacteria; o__Rhizobiales; f__Hyphomicrobiaceae; g__Hyphomicrobium; s__	0.00060367	0.000281713	0.000925628	0.000201223	0.000241468	0.000120734	0.000120734	0.000120734	0.000120734	0	0	0	8.04894e-05	0.000281713	0.000482936	8.04894e-05	0.000321958	0.000563426	0	0.000120734	0	0.000120734	8.04894e-05	4.02447e-05	0.000201223	0	0.000201223	0.000201223	0.000201223	0.000201223	0.000160979	8.04894e-05	0.000201223	8.04894e-05	4.02447e-05	0.000201223	0.0011671	0.00112685	0.00108661	0.000201223	0.000120734	0.000160979	0.00060367	8.04894e-05	8.04894e-05	0.000120734	0.000160979	0.000120734
OTU_278	k__Bacteria; p__Planctomycetes; c__Phycisphaerae; o__Phycisphaerales; f__; g__; s__	0.000201223	8.04894e-05	0	0.000160979	0	4.02447e-05	4.02447e-05	0.000281713	0.000120734	8.04894e-05	0.000201223	0.000281713	8.04894e-05	8.04894e-05	8.04894e-05	0	0	4.02447e-05	0	0.000120734	0	0	0	4.02447e-05	0	4.02447e-05	0	4.02447e-05	0	0	0	8.04894e-05	0	8.04894e-05	4.02447e-05	4.02447e-05	0.00060367	0.000402447	0.000482936	0.000321958	0.000523181	0.000160979	0.00233419	0.0011671	0.00209272	0.000281713	0.000321958	0.000321958
OTU_233	k__Bacteria; p__Proteobacteria; c__Betaproteobacteria; o__MWH-UniP1; f__; g__; s__	8.04894e-05	0.000120734	0.000160979	8.04894e-05	8.04894e-05	0.000120734	8.04894e-05	0.000362202	4.02447e-05	0.00068416	0.00136832	0.00068416	0.000120734	0.000201223	0.000362202	8.04894e-05	0.000120734	8.04894e-05	0.000201223	0.000523181	0	4.02447e-05	0	0	0	0	0	8.04894e-05	4.02447e-05	0	8.04894e-05	0.000160979	8.04894e-05	0.000160979	0.000120734	0.000241468	8.04894e-05	0.000120734	8.04894e-05	4.02447e-05	4.02447e-05	0.000120734	0	4.02447e-05	8.04894e-05	4.02447e-05	4.02447e-05	0
OTU_4482	k__Bacteria; p__Cyanobacteria; c__Chloroplast; o__Stramenopiles; f__; g__; s__	0.000160979	0.000201223	0.000160979	0.000402447	0.000120734	0.000241468	0.000201223	0.000281713	0.000241468	0.000120734	0	0.000120734	0.000120734	8.04894e-05	0.000281713	8.04894e-05	0.000402447	0.000402447	0	0.000482936	4.02447e-05	0.000402447	0.0011671	0.000482936	4.02447e-05	0	0.000201223	0.000241468	0.000885383	0.000120734	0.000201223	0.000160979	0.000281713	0.000321958	0.000925628	0.00060367	0.000120734	0.000120734	0.000201223	4.02447e-05	0.000201223	0.000160979	4.02447e-05	0	0	0	8.04894e-05	0
OTU_19596	k__Bacteria; p__Bacteroidetes; c__Flavobacteriia; o__Flavobacteriales; f__Flavobacteriaceae; g__Flavobacterium; s__succinicans	0.000643915	8.04894e-05	8.04894e-05	4.02447e-05	0.000160979	8.04894e-05	0	8.04894e-05	4.02447e-05	4.02447e-05	0	4.02447e-05	0.000120734	0.000160979	8.04894e-05	8.04894e-05	0.000241468	0.000241468	8.04894e-05	0	0.000120734	0.00068416	0.000362202	0.000804894	0.00177077	0	0.00144881	0	0.000120734	8.04894e-05	0.000120734	0.000120734	8.04894e-05	0.000160979	8.04894e-05	0.000160979	0.000160979	4.02447e-05	0.000120734	0.000724404	0.000643915	0.00060367	0.000160979	4.02447e-05	4.02447e-05	4.02447e-05	0.000120734	4.02447e-05
OTU_13735	k__Bacteria; p__Proteobacteria; c__Betaproteobacteria; o__Burkholderiales; f__Comamonadaceae	0.000643915	0.000120734	0.000281713	0	0	0.000120734	0	8.04894e-05	8.04894e-05	0	0.000120734	4.02447e-05	4.02447e-05	0.000362202	0.00068416	8.04894e-05	0.000120734	0	4.02447e-05	4.02447e-05	0.000120734	4.02447e-05	4.02447e-05	0	4.02447e-05	0.000120734	0	0.000120734	8.04894e-05	4.02447e-05	4.02447e-05	4.02447e-05	4.02447e-05	4.02447e-05	0.000885383	0.000160979	0.000120734	4.02447e-05	0.000120734	4.02447e-05	0.000120734	0.000120734	0.000201223	8.04894e-05	8.04894e-05	4.02447e-05	0.000160979	0
OTU_291	k__Bacteria; p__Chloroflexi; c__Ellin6529; o__; f__; g__; s__	0.000362202	0.000241468	0.000120734	4.02447e-05	0.000120734	0	0.000120734	4.02447e-05	0.000201223	0	0	0	0.000120734	0.000120734	4.02447e-05	0	4.02447e-05	0.000120734	0	0	0	0	0	8.04894e-05	4.02447e-05	0	0	4.02447e-05	0.000120734	0.000160979	0	0	4.02447e-05	0	0	4.02447e-05	0.0026159	0.00213297	0.00132807	8.04894e-05	8.04894e-05	0.000241468	0.000764649	0.000523181	0.00104636	8.04894e-05	0.000241468	8.04894e-05
OTU_3773	k__Bacteria; p__Proteobacteria; c__Alphaproteobacteria; o__Caulobacterales; f__Caulobacteraceae; g__; s__	0.000402447	0.000523181	0.000241468	0.000201223	0.000362202	0.000241468	8.04894e-05	0.000120734	4.02447e-05	0.00144881	0.00136832	0.00217321	8.04894e-05	0.000281713	0.000241468	8.04894e-05	0.000120734	8.04894e-05	0.00068416	0.00108661	0.000201223	0.000241468	8.04894e-05	0	0	0	0	4.02447e-05	0.000120734	0.000120734	0.000201223	0.000120734	0.000160979	0	4.02447e-05	8.04894e-05	0	4.02447e-05	0	0	0	0	4.02447e-05	0	0	0	0	4.02447e-05
OTU_10328	k__Bacteria; p__Bacteroidetes; c__Flavobacteriia; o__Flavobacteriales; f__Flavobacteriaceae; g__Flavobacterium; s__	0	0	8.04894e-05	0.000160979	0.000281713	0.000160979	0	0.000281713	8.04894e-05	0	4.02447e-05	8.04894e-05	8.04894e-05	0	0.000160979	0.000201223	8.04894e-05	0.000120734	0.00104636	0.0018915	0.00478912	0.000241468	8.04894e-05	8.04894e-05	0	0	4.02447e-05	0	8.04894e-05	0	8.04894e-05	8.04894e-05	0.000120734	0	8.04894e-05	4.02447e-05	4.02447e-05	0	0	0	0	0	8.04894e-05	8.04894e-05	0	4.02447e-05	0	0
OTU_295	k__Bacteria; p__Chloroflexi; c__Chloroflexi; o__Herpetosiphonales; f__; g__; s__	4.02447e-05	4.02447e-05	8.04894e-05	0.000241468	0.000160979	8.04894e-05	0	0	0	0.000241468	0.000201223	0.000160979	0	0.000160979	0	0.000120734	0	0.000160979	0.000925628	0.00068416	0.000160979	4.02447e-05	8.04894e-05	0.000241468	0.000563426	0.00140856	0.000845138	4.02447e-05	0.00060367	0.000321958	8.04894e-05	4.02447e-05	8.04894e-05	0.000201223	0.00060367	0.000201223	0.000201223	0	4.02447e-05	0.000120734	0.000120734	0.000281713	0.00068416	0.000160979	0.000120734	4.02447e-05	8.04894e-05	0.000442692
OTU_7358	k__Bacteria; p__Cyanobacteria; c__Chloroplast; o__Stramenopiles; f__; g__; s__	4.02447e-05	0	0.000120734	0.000362202	0.000804894	0.000160979	0.000442692	0.000241468	0.000120734	4.02447e-05	0	0	0	8.04894e-05	0	0.000241468	0.000201223	0.000643915	0	0	4.02447e-05	0.0011671	0.00160979	0.00193175	4.02447e-05	0.000120734	0.000402447	0.000281713	0.000160979	8.04894e-05	4.02447e-05	0	0	0.000160979	0.000201223	4.02447e-05	0.000160979	8.04894e-05	0.000120734	8.04894e-05	8.04894e-05	8.04894e-05	8.04894e-05	4.02447e-05	8.04894e-05	4.02447e-05	4.02447e-05	8.04894e-05
OTU_288	k__Bacteria; p__Proteobacteria; c__Alphaproteobacteria; o__Rhodospirillales; f__Acetobacteraceae; g__; s__	0.000321958	8.04894e-05	0.000362202	0.000281713	0.000160979	4.02447e-05	8.04894e-05	0.000281713	0.000321958	0	0	0	0.000201223	0	8.04894e-05	0.000160979	0.000201223	0.000482936	0	0	0	0	0	0	0	0	0	4.02447e-05	0.000160979	0.000160979	0.000160979	0.000362202	0.000201223	0.000201223	4.02447e-05	8.04894e-05	0.00136832	0.000925628	0.00100612	0.000241468	0.000201223	0.000362202	0.000563426	0.00108661	0.000885383	8.04894e-05	8.04894e-05	4.02447e-05
OTU_321	k__Bacteria; p__Cyanobacteria; c__Chloroplast; o__Cryptophyta; f__; g__; s__	0.000442692	0.000402447	0.000120734	0.000281713	0.000160979	0.00313909	0.000160979	8.04894e-05	0.000241468	0	0	0	4.02447e-05	8.04894e-05	0.000201223	0.000281713	0.000523181	0.000201223	4.02447e-05	0	0	0.000804894	0.000241468	0.000804894	0	0	0	0.000160979	0.000120734	8.04894e-05	0.000120734	0.000120734	8.04894e-05	0.000120734	0	0.000241468	0	8.04894e-05	0	8.04894e-05	0	0	0.000201223	0.000160979	0.000120734	0	4.02447e-05	4.02447e-05
OTU_10325	k__Bacteria; p__Proteobacteria; c__Betaproteobacteria; o__Burkholderiales; f__Oxalobacteraceae; g__Polynucleobacter; s__	8.04894e-05	4.02447e-05	0.000160979	0.000281713	0.000281713	0.000563426	0.000241468	0.000523181	0.000241468	0.000925628	0.00132807	0.000724404	0.000241468	0.000241468	0.000281713	0.000160979	0.000281713	0.000281713	0	8.04894e-05	8.04894e-05	0.000160979	0.000241468	0.000160979	4.02447e-05	0.000120734	0.000160979	0.000201223	0.000120734	0.000281713	0.000442692	0.000241468	0.000160979	8.04894e-05	0.000160979	0.000241468	0	0	0	8.04894e-05	8.04894e-05	0	4.02447e-05	8.04894e-05	0	0.000120734	4.02447e-05	0
OTU_946	k__Bacteria; p__Actinobacteria; c__Actinobacteria; o__Actinomycetales; f__Microbacteriaceae; g__Candidatus Rhodoluna; s__	4.02447e-05	0.000120734	4.02447e-05	8.04894e-05	0	8.04894e-05	4.02447e-05	0	4.02447e-05	0.000120734	0.000160979	0.000120734	4.02447e-05	4.02447e-05	4.02447e-05	8.04894e-05	4.02447e-05	0	0.000120734	4.02447e-05	4.02447e-05	0.00132807	0.0015293	0.00144881	0.000482936	0.000965873	0.000321958	0	4.02447e-05	8.04894e-05	0	8.04894e-05	4.02447e-05	4.02447e-05	8.04894e-05	4.02447e-05	4.02447e-05	4.02447e-05	0	0	0	4.02447e-05	0	0.000120734	0	0.000160979	4.02447e-05	8.04894e-05
OTU_6172	k__Bacteria; p__Proteobacteria; c__Alphaproteobacteria; o__Sphingomonadales; f__Sphingomonadaceae; g__Novosphingobium; s__	8.04894e-05	0.000160979	4.02447e-05	4.02447e-05	0.000201223	4.02447e-05	0	0	8.04894e-05	0	0	0	0	0.000201223	4.02447e-05	4.02447e-05	0.000120734	8.04894e-05	0.000201223	4.02447e-05	4.02447e-05	8.04894e-05	0	4.02447e-05	0.00273664	0.00108661	0.00281713	0.000201223	0.000885383	0.000523181	4.02447e-05	4.02447e-05	4.02447e-05	0.000241468	0.000201223	0.000201223	8.04894e-05	4.02447e-05	0.000120734	4.02447e-05	4.02447e-05	0	4.02447e-05	4.02447e-05	0	4.02447e-05	0	0
OTU_317	k__Bacteria; p__Proteobacteria; c__Gammaproteobacteria; o__Legionellales; f__Legionellaceae; g__; s__	0.000563426	0.00104636	0.000845138	0.000120734	0	0.000201223	4.02447e-05	0.000201223	0.000321958	0	0	0	8.04894e-05	8.04894e-05	8.04894e-05	0.000120734	0.000120734	0.000201223	0.000201223	0.000120734	4.02447e-05	0.000201223	0.000442692	0.000321958	0	4.02447e-05	4.02447e-05	0.000120734	4.02447e-05	0.000241468	4.02447e-05	0.000160979	8.04894e-05	0	0.000120734	8.04894e-05	0.000442692	0.000362202	0.000120734	0.000120734	0.000120734	8.04894e-05	0.000724404	0.000643915	0.000845138	0.000442692	8.04894e-05	0.000120734
OTU_14253	k__Bacteria; p__Proteobacteria; c__Betaproteobacteria; o__Burkholderiales; f__Comamonadaceae; g__Hydrogenophaga; s__	0.000281713	8.04894e-05	4.02447e-05	8.04894e-05	0	4.02447e-05	0	4.02447e-05	0	0	0	0	0.00104636	0.000201223	0.000523181	0	4.02447e-05	8.04894e-05	0.000201223	0.00201223	0.000120734	0.000442692	0.000241468	4.02447e-05	4.02447e-05	0	0	0.000120734	0.000201223	0.000281713	0.000120734	4.02447e-05	0.000643915	8.04894e-05	0	0	0.000160979	0.000241468	0.000120734	0	0	4.02447e-05	0.000120734	0	4.02447e-05	0.000965873	0.00104636	0.00104636
OTU_270	k__Bacteria; p__Proteobacteria; c__Betaproteobacteria; o__Burkholderiales	0.000643915	0.000362202	0.000643915	8.04894e-05	0.000201223	8.04894e-05	0.000120734	4.02447e-05	0.000160979	0.00193175	0.00112685	0.0022537	8.04894e-05	0.000201223	0.000120734	0.000201223	0.000241468	8.04894e-05	8.04894e-05	4.02447e-05	0	8.04894e-05	0	0	4.02447e-05	0	0.000120734	4.02447e-05	4.02447e-05	0	4.02447e-05	4.02447e-05	8.04894e-05	0.000120734	4.02447e-05	0.000241468	8.04894e-05	8.04894e-05	0	0.000120734	8.04894e-05	8.04894e-05	4.02447e-05	0	0	8.04894e-05	0.000241468	4.02447e-05
OTU_2587	k__Bacteria; p__Proteobacteria; c__Alphaproteobacteria; o__Sphingomonadales; f__Erythrobacteraceae; g__; s__	0.000160979	0	4.02447e-05	0.000120734	0.000120734	0	4.02447e-05	4.02447e-05	8.04894e-05	8.04894e-05	0	4.02447e-05	8.04894e-05	0.000442692	4.02447e-05	0	4.02447e-05	8.04894e-05	0.000120734	0.000120734	0.000120734	0	0	4.02447e-05	0.000764649	0.00237444	0.000804894	0.000120734	0.000120734	0.000241468	4.02447e-05	4.02447e-05	0	0.000241468	0.0011671	4.02447e-05	0	0.000724404	0.000160979	0.000321958	0.000160979	0.000160979	0.000563426	4.02447e-05	4.02447e-05	0.000241468	0.000160979	0.000402447
OTU_289	k__Bacteria; p__Proteobacteria; c__Betaproteobacteria; o__Neisseriales; f__Neisseriaceae; g__Aquaspirillum; s__serpens	0.000281713	0.000482936	0.000281713	0.000120734	0.000281713	0.000120734	0.000160979	8.04894e-05	0.000120734	8.04894e-05	4.02447e-05	4.02447e-05	0.000241468	0.000201223	0.000563426	0.000160979	4.02447e-05	4.02447e-05	0.00177077	0.00193175	0.00136832	0.000120734	8.04894e-05	0.000120734	4.02447e-05	4.02447e-05	4.02447e-05	0.000120734	0.000120734	4.02447e-05	8.04894e-05	8.04894e-05	8.04894e-05	4.02447e-05	0	0.000120734	4.02447e-05	0	0	8.04894e-05	0	8.04894e-05	8.04894e-05	4.02447e-05	0	0.000482936	0.000160979	0.000120734
OTU_20012	k__Bacteria; p__Bacteroidetes; c__Flavobacteriia; o__Flavobacteriales; f__Flavobacteriaceae; g__Flavobacterium; s__succinicans	8.04894e-05	4.02447e-05	4.02447e-05	4.02447e-05	0.000160979	0	0	8.04894e-05	0	4.02447e-05	0	0	0.000160979	4.02447e-05	0.000160979	4.02447e-05	4.02447e-05	4.02447e-05	0.000120734	0.000120734	0.000402447	0.00177077	0.00132807	0.0018915	4.02447e-05	0.000201223	8.04894e-05	0.000160979	0	4.02447e-05	8.04894e-05	0.000160979	0.000160979	0.000120734	8.04894e-05	8.04894e-05	0	8.04894e-05	0	4.02447e-05	0	4.02447e-05	4.02447e-05	0.000120734	0.000160979	0.000402447	0.000321958	0.000120734
OTU_263	k__Bacteria; p__Proteobacteria; c__Alphaproteobacteria; o__Rhodobacterales; f__Rhodobacteraceae	0.000281713	0.000160979	0.000160979	0.000241468	0.00112685	0.000402447	0.000201223	0.000201223	0.000120734	8.04894e-05	0	0	8.04894e-05	0.000482936	8.04894e-05	0.000120734	0.000120734	0.000362202	0.000120734	0.000201223	8.04894e-05	0.000281713	0.000281713	0.000120734	0.00108661	0.000764649	0.000402447	0.000160979	0.000281713	0.000643915	0.000120734	0.000120734	0.000120734	4.02447e-05	0.000241468	4.02447e-05	0.000120734	0.000120734	0.000120734	0	0	0	4.02447e-05	0	0	0	8.04894e-05	0.000120734
OTU_2973	k__Bacteria; p__Bacteroidetes; c__Flavobacteriia; o__Flavobacteriales; f__Flavobacteriaceae; g__Flavobacterium; s__	0.000442692	0.000321958	0.000201223	0.000201223	0.000201223	0.000160979	0.000241468	0.000160979	0.000160979	0	0	0	8.04894e-05	4.02447e-05	8.04894e-05	0.000120734	0.000321958	0.000201223	8.04894e-05	0.000120734	0.000120734	0.000241468	0.000241468	0.000482936	0.00229395	0.000241468	0.00144881	4.02447e-05	0.000120734	0.000241468	8.04894e-05	0.000160979	4.02447e-05	0.000160979	0.00136832	0	4.02447e-05	0	4.02447e-05	0	0	0	4.02447e-05	0	4.02447e-05	4.02447e-05	0	0
OTU_262	k__Bacteria; p__Verrucomicrobia; c__Opitutae; o__Opitutales; f__Opitutaceae; g__Opitutus; s__	0.000281713	0.000241468	0.000321958	0.000160979	0.000120734	0.000201223	0.000120734	0.000281713	0.000241468	0	0	0.000160979	0.000160979	4.02447e-05	0.000201223	0.000120734	0.000120734	0.000281713	8.04894e-05	4.02447e-05	4.02447e-05	0	0	0	8.04894e-05	0.000120734	4.02447e-05	0.000241468	0.000321958	8.04894e-05	0.000402447	0.000201223	0.000201223	0.000281713	0.000281713	0.000160979	4.02447e-05	0	0	0	0	4.02447e-05	0	0	4.02447e-05	0	0	0
OTU_302	k__Bacteria; p__Proteobacteria; c__Alphaproteobacteria; o__Rickettsiales; f__; g__; s__	0.000281713	8.04894e-05	8.04894e-05	8.04894e-05	4.02447e-05	0.000160979	0.000442692	0.000281713	0.000201223	0	0	0	0.000120734	4.02447e-05	0.000160979	0.000120734	0.000160979	0.000120734	0	0	0	0.000482936	0.000201223	0.000241468	0	0	0	0.000120734	4.02447e-05	0.000160979	0.000241468	4.02447e-05	8.04894e-05	0.000120734	8.04894e-05	0.000281713	0.000241468	0.000160979	0.000362202	0.00068416	0.000845138	0.000523181	0.00108661	0.000724404	0.00068416	0.000201223	0.000120734	0.000321958
OTU_331	k__Bacteria; p__Proteobacteria; c__Gammaproteobacteria; o__Xanthomonadales; f__Sinobacteraceae; g__; s__	4.02447e-05	0.000201223	0.000160979	0.000120734	0.000362202	0.000160979	4.02447e-05	0.000120734	0.000201223	0.000160979	8.04894e-05	0.000201223	4.02447e-05	0.000201223	8.04894e-05	0.000160979	8.04894e-05	0.000321958	8.04894e-05	4.02447e-05	0	0.000241468	0	0.000120734	0.000724404	0.000965873	0.00100612	0.000201223	0.00060367	0.000241468	8.04894e-05	0.000120734	8.04894e-05	0	4.02447e-05	4.02447e-05	4.02447e-05	0.000402447	8.04894e-05	0	4.02447e-05	0	0.000160979	0	0	4.02447e-05	4.02447e-05	0
OTU_16934	k__Bacteria; p__Proteobacteria; c__Betaproteobacteria; o__Burkholderiales; f__Comamonadaceae; g__Hydrogenophaga; s__	0.000321958	0.000482936	0.00060367	0.000160979	0	4.02447e-05	0	0.000120734	0	0.000362202	0.000442692	0.000362202	0.000442692	0.000120734	0.000281713	4.02447e-05	0	0.000120734	0.00060367	0.00104636	0.00060367	0.000201223	0.000281713	0.000201223	4.02447e-05	0	0	0	8.04894e-05	8.04894e-05	8.04894e-05	0.000120734	0.000482936	0.000201223	4.02447e-05	0.000120734	4.02447e-05	4.02447e-05	0.000201223	0.000160979	8.04894e-05	4.02447e-05	0.000201223	0	0	0.000523181	0.000281713	0.000321958
OTU_6847	k__Bacteria; p__Cyanobacteria; c__Chloroplast; o__Stramenopiles; f__; g__; s__	8.04894e-05	4.02447e-05	0.000160979	4.02447e-05	4.02447e-05	0	4.02447e-05	0	0	0	0	0	0	0	0.000201223	8.04894e-05	4.02447e-05	8.04894e-05	0	0	0	0.000120734	0	4.02447e-05	0	0	0	8.04894e-05	4.02447e-05	4.02447e-05	8.04894e-05	0	8.04894e-05	0.00285737	0.00201223	0.00297811	0	4.02447e-05	4.02447e-05	8.04894e-05	0	4.02447e-05	8.04894e-05	0	0	0	0	0
OTU_305	k__Bacteria; p__Proteobacteria; c__Gammaproteobacteria; o__Legionellales; f__Coxiellaceae; g__; s__	0.000160979	0.000120734	0.000241468	0.000965873	0.00128783	0.000965873	0.000241468	0.000160979	0.000724404	0	0	4.02447e-05	0.000160979	0.000482936	0.000563426	0.000201223	0.000321958	0.000281713	8.04894e-05	0	0	0	0	0	0	0	0	0.000764649	0.000563426	0.000442692	0.000201223	0.000281713	0.000241468	0	8.04894e-05	0.000281713	8.04894e-05	0	4.02447e-05	0	0	0	0.000120734	0	4.02447e-05	4.02447e-05	8.04894e-05	8.04894e-05
OTU_11176	k__Bacteria; p__Proteobacteria; c__Gammaproteobacteria; o__Pseudomonadales; f__Pseudomonadaceae; g__Pseudomonas; s__alcaligenes	0.000241468	0.000321958	0.000120734	0.000482936	0.000321958	4.02447e-05	8.04894e-05	4.02447e-05	4.02447e-05	8.04894e-05	0.000160979	0	0.000201223	0.000482936	0.000321958	4.02447e-05	4.02447e-05	4.02447e-05	0.000925628	0.000362202	0.000845138	4.02447e-05	4.02447e-05	0	4.02447e-05	0.000120734	4.02447e-05	0.00197199	4.02447e-05	4.02447e-05	0.000241468	0.000321958	8.04894e-05	0	0.000160979	8.04894e-05	8.04894e-05	0.000402447	0.00060367	4.02447e-05	0	4.02447e-05	8.04894e-05	4.02447e-05	4.02447e-05	8.04894e-05	8.04894e-05	4.02447e-05
OTU_767	k__Bacteria; p__Verrucomicrobia; c__Verrucomicrobiae; o__Verrucomicrobiales; f__Verrucomicrobiaceae; g__Luteolibacter; s__	0.000201223	0.000201223	4.02447e-05	0.000120734	0.000160979	0.000160979	8.04894e-05	0.000120734	0.000160979	0.000321958	0.000281713	0.000482936	0.000120734	0.000241468	4.02447e-05	4.02447e-05	0.000402447	0.000120734	4.02447e-05	0	0	0.000321958	0.000523181	0.000281713	0.00144881	0.000845138	0.00104636	0.000241468	0.000362202	0.000845138	8.04894e-05	0.000120734	0.000160979	0.000120734	0	8.04894e-05	0	0.000120734	0	0	0	0	0	0	0	0	0	0
OTU_8052	k__Bacteria; p__Proteobacteria; c__Betaproteobacteria; o__Burkholderiales; f__Alcaligenaceae; g__Pigmentiphaga; s__	4.02447e-05	4.02447e-05	0.000120734	4.02447e-05	8.04894e-05	0.000160979	0.000160979	0	0.000201223	0.000160979	0.000764649	0.00136832	0.000241468	0.000201223	0.000241468	0.000120734	0.000120734	0.000160979	0.000362202	0.000120734	0.000160979	0.000281713	0.000281713	0.000442692	8.04894e-05	0	4.02447e-05	0.000201223	0.000120734	8.04894e-05	8.04894e-05	0.000120734	4.02447e-05	0.000201223	0.000241468	8.04894e-05	8.04894e-05	0.000120734	0.000160979	0.000241468	0.000160979	4.02447e-05	8.04894e-05	4.02447e-05	4.02447e-05	0.000160979	0.000160979	0.000120734
OTU_14373	k__Bacteria; p__Proteobacteria; c__Betaproteobacteria; o__Burkholderiales; f__Comamonadaceae	0.000281713	0.000201223	0.000160979	0.000120734	0.000241468	0.000120734	4.02447e-05	8.04894e-05	0.000120734	0.000885383	0.000523181	0.00112685	0.000201223	0.000201223	0.000442692	8.04894e-05	0	0.000160979	4.02447e-05	0.000120734	4.02447e-05	0.000402447	0.000563426	0.00060367	4.02447e-05	8.04894e-05	8.04894e-05	8.04894e-05	0.000362202	8.04894e-05	8.04894e-05	0.000120734	0.000120734	0.000160979	0.000241468	4.02447e-05	8.04894e-05	8.04894e-05	8.04894e-05	4.02447e-05	4.02447e-05	0	4.02447e-05	0	4.02447e-05	0.000281713	0.000442692	0.000442692
OTU_12825	k__Bacteria; p__Proteobacteria; c__Betaproteobacteria; o__Methylophilales; f__Methylophilaceae; g__; s__	0	0	0	0	0	4.02447e-05	0	0	0	4.02447e-05	4.02447e-05	0	0	0	0	4.02447e-05	0	0	0	4.02447e-05	0	0	0	0	0	0	0	0	0	0	0	4.02447e-05	0	0	0	0	0	4.02447e-05	0.000201223	0	0	0	4.02447e-05	0	0	0	0	0
OTU_322	k__Bacteria; p__Acidobacteria; c__Solibacteres; o__Solibacterales; f__[Bryobacteraceae]; g__; s__	0.000201223	4.02447e-05	8.04894e-05	0	0.000201223	0.000160979	8.04894e-05	0.000160979	4.02447e-05	0	8.04894e-05	8.04894e-05	0.000241468	4.02447e-05	0.000241468	8.04894e-05	8.04894e-05	8.04894e-05	0	0	4.02447e-05	0.000160979	4.02447e-05	4.02447e-05	4.02447e-05	8.04894e-05	0	0.000160979	0.000120734	0.000201223	0.000281713	0.000160979	0.000120734	0.000442692	4.02447e-05	8.04894e-05	0.00185126	0.00144881	0.00124759	4.02447e-05	8.04894e-05	0	0.000482936	0.000321958	0.000241468	0.000120734	0.000120734	0.000120734
OTU_18369	k__Bacteria; p__Cyanobacteria; c__Chloroplast; o__Stramenopiles; f__; g__; s__	0.000160979	0.000120734	4.02447e-05	4.02447e-05	0.000563426	0.000281713	0.000201223	0.000120734	0.000120734	0	0	4.02447e-05	0.000120734	4.02447e-05	4.02447e-05	0.000321958	0.000160979	0.000362202	0	0.000201223	0	0.00128783	0.00205248	0.000804894	0.000120734	0	0	0.000201223	0.000321958	0.000241468	0.000120734	0.000160979	8.04894e-05	0.000362202	0.000241468	0.000160979	8.04894e-05	8.04894e-05	4.02447e-05	0.000120734	0.000160979	0.000120734	0.000120734	8.04894e-05	4.02447e-05	0	0	0
OTU_294	k__Bacteria; p__Verrucomicrobia; c__Verrucomicrobiae; o__Verrucomicrobiales; f__Verrucomicrobiaceae; g__; s__	0.00068416	0.000402447	0.000764649	0	8.04894e-05	0.000281713	0	0	4.02447e-05	0.000482936	0.000120734	0.000281713	0	0.000160979	0	0	8.04894e-05	8.04894e-05	0.000241468	0.000241468	4.02447e-05	4.02447e-05	0	0	0.00193175	0.00120734	0.00209272	4.02447e-05	8.04894e-05	0.000442692	0	0	0	8.04894e-05	4.02447e-05	4.02447e-05	0	0	0	0	0	0	0	0	0	0	0	0
OTU_308	k__Bacteria; p__Proteobacteria; c__Deltaproteobacteria; o__Myxococcales; f__; g__; s__	0.000201223	0.000120734	8.04894e-05	0.000482936	0.000523181	0.000845138	0.000523181	0.000281713	0.00148905	0	0	0	4.02447e-05	0.000120734	8.04894e-05	0.000321958	0.000402447	0.00112685	0	8.04894e-05	0	0	4.02447e-05	8.04894e-05	0	0	4.02447e-05	0.000241468	0.000362202	0.000120734	0.000241468	4.02447e-05	0.000120734	0.000321958	0.000321958	0.000402447	0.000321958	4.02447e-05	0.000120734	4.02447e-05	8.04894e-05	0	8.04894e-05	0.000160979	0.000201223	0	0	4.02447e-05
OTU_18614	k__Bacteria; p__Actinobacteria; c__Actinobacteria; o__Actinomycetales; f__Microbacteriaceae; g__Candidatus Rhodoluna; s__	0	8.04894e-05	8.04894e-05	0.000120734	0	0	4.02447e-05	0.000160979	0	0.000885383	0.00169028	0.00132807	0.000120734	4.02447e-05	8.04894e-05	0	4.02447e-05	0	4.02447e-05	0	0	0.000643915	0.00060367	0.000643915	0	4.02447e-05	0	4.02447e-05	4.02447e-05	4.02447e-05	0	0.000160979	8.04894e-05	4.02447e-05	4.02447e-05	0	8.04894e-05	0.000281713	0.000201223	8.04894e-05	8.04894e-05	0.000201223	0	0.000160979	0.000160979	0	8.04894e-05	4.02447e-05
OTU_126	k__Bacteria; p__Proteobacteria; c__Gammaproteobacteria; o__Enterobacteriales; f__Enterobacteriaceae	0	0	0	0	4.02447e-05	0	0	0	0	0	0	0	0	0	0	0	0	0	0	0	0	0	0	0	8.04894e-05	8.04894e-05	0	0	8.04894e-05	0	0	0	0	0	0	0	0	0	0	0	0	0	0	4.02447e-05	0	0	0	0
OTU_6839	k__Bacteria; p__Proteobacteria; c__Betaproteobacteria; o__Burkholderiales; f__Comamonadaceae; g__Hydrogenophaga; s__	0.000201223	0.000241468	0.000241468	0.000120734	8.04894e-05	0.000160979	0.000120734	8.04894e-05	0	0.000442692	0.000241468	0.000482936	0.000120734	0	8.04894e-05	0.000160979	8.04894e-05	4.02447e-05	0.000965873	0.00160979	0.00120734	0.000160979	0	8.04894e-05	0	0	0.000160979	0.000120734	8.04894e-05	8.04894e-05	8.04894e-05	0.000120734	4.02447e-05	0	0	4.02447e-05	0	4.02447e-05	8.04894e-05	8.04894e-05	0.000201223	0.000201223	4.02447e-05	8.04894e-05	4.02447e-05	8.04894e-05	0.000281713	0.000160979
OTU_2706	k__Bacteria; p__Actinobacteria; c__Acidimicrobiia; o__Acidimicrobiales; f__C111; g__; s__	0.000281713	0.000402447	0.000563426	8.04894e-05	0.000160979	0.000160979	0	0.000160979	8.04894e-05	0.000643915	0.000482936	0.00104636	0	0.000160979	0.000160979	8.04894e-05	0.000120734	4.02447e-05	0.000160979	0.000724404	0.000120734	0.000321958	4.02447e-05	8.04894e-05	8.04894e-05	0.000120734	8.04894e-05	4.02447e-05	4.02447e-05	0.000160979	0.000120734	4.02447e-05	0	4.02447e-05	0	0.000120734	0	0	0	4.02447e-05	0	0	4.02447e-05	0	0	0.000120734	0	0
OTU_299	k__Bacteria; p__Actinobacteria; c__Actinobacteria; o__Actinomycetales; f__Intrasporangiaceae; g__Phycicoccus; s__	0.000120734	0.000120734	0.000120734	8.04894e-05	0.000160979	4.02447e-05	4.02447e-05	0.000120734	8.04894e-05	4.02447e-05	0	0	0	0.000160979	0	0.000160979	0.000201223	0.000120734	0	8.04894e-05	0	0.000120734	0.000160979	0.000120734	0.00181101	0.0011671	0.00160979	8.04894e-05	0.00068416	8.04894e-05	0	0.000241468	0.000160979	0.000160979	0.000160979	4.02447e-05	8.04894e-05	0.000241468	4.02447e-05	4.02447e-05	0.000120734	0	0.000160979	8.04894e-05	4.02447e-05	0.000120734	0	4.02447e-05
OTU_296	k__Bacteria; p__Planctomycetes; c__Phycisphaerae; o__Phycisphaerales; f__; g__; s__	0.000321958	8.04894e-05	0.000201223	0.000201223	0	8.04894e-05	0.000281713	0.000160979	0.000321958	8.04894e-05	0	0	0.000241468	0	4.02447e-05	8.04894e-05	0.000160979	4.02447e-05	0	0	4.02447e-05	0	0	0	0	0	0	0	0	0	4.02447e-05	0	4.02447e-05	8.04894e-05	4.02447e-05	0	0.000764649	0.000281713	0.000925628	8.04894e-05	0.000201223	8.04894e-05	0.00136832	0.00108661	0.00181101	0.000120734	0.000160979	0.000120734
OTU_338	k__Bacteria; p__Proteobacteria; c__Alphaproteobacteria; o__Rhodospirillales; f__Rhodospirillaceae; g__; s__	8.04894e-05	4.02447e-05	4.02447e-05	4.02447e-05	8.04894e-05	4.02447e-05	0.000120734	4.02447e-05	8.04894e-05	0	0	0	0	0	0.000120734	0	8.04894e-05	0.000281713	0.000120734	0.00068416	0.000160979	0	0	4.02447e-05	0	0	0	8.04894e-05	8.04894e-05	8.04894e-05	0	0	4.02447e-05	0.000563426	0.000442692	0.000563426	0.000925628	0.00104636	0.00100612	0.000402447	0.000160979	0.000241468	0.000321958	0.000482936	0.000321958	8.04894e-05	0	8.04894e-05
OTU_325	k__Bacteria; p__Proteobacteria; c__Alphaproteobacteria; o__Sphingomonadales; f__Sphingomonadaceae; g__Novosphingobium; s__	8.04894e-05	4.02447e-05	8.04894e-05	0.000160979	0.000201223	0.000160979	8.04894e-05	8.04894e-05	0	8.04894e-05	0	0	0	0	0	0	0.000201223	0.000160979	8.04894e-05	0	4.02447e-05	0.000523181	0.000442692	0.000281713	0.00193175	0.00148905	0.00112685	8.04894e-05	0.00068416	0.000362202	4.02447e-05	8.04894e-05	0.000241468	0.000201223	0.000120734	4.02447e-05	0	0.000160979	8.04894e-05	0	4.02447e-05	0	4.02447e-05	0	0	8.04894e-05	0	0
OTU_373	k__Bacteria; p__Bacteroidetes; c__[Saprospirae]; o__[Saprospirales]; f__Chitinophagaceae; g__Niabella; s__	0.000201223	0	4.02447e-05	0.000241468	0.000523181	0	4.02447e-05	0.000321958	0.000160979	4.02447e-05	4.02447e-05	8.04894e-05	0.000201223	4.02447e-05	0.000120734	0.000160979	0.000120734	0.000160979	4.02447e-05	0.000120734	4.02447e-05	8.04894e-05	4.02447e-05	0.000281713	0.00124759	0.00068416	0.00169028	0.000201223	0.000563426	0.000321958	8.04894e-05	0.000120734	4.02447e-05	8.04894e-05	0.000281713	4.02447e-05	8.04894e-05	0.000160979	8.04894e-05	4.02447e-05	0	4.02447e-05	8.04894e-05	4.02447e-05	0	8.04894e-05	4.02447e-05	4.02447e-05
OTU_329	k__Bacteria; p__Proteobacteria; c__Betaproteobacteria; o__Hydrogenophilales; f__Hydrogenophilaceae; g__Thiobacillus; s__	0	0	0	0.000482936	0.000804894	0.000563426	8.04894e-05	0	8.04894e-05	8.04894e-05	8.04894e-05	8.04894e-05	0.0011671	0.000362202	0.000402447	0.000160979	0.000120734	0.000160979	0	0	0	0.000362202	0.000201223	0.000160979	8.04894e-05	8.04894e-05	8.04894e-05	8.04894e-05	0.000402447	0.000241468	0.000241468	0.000241468	0.000442692	0.000120734	8.04894e-05	0.000241468	0	0.000241468	4.02447e-05	0	4.02447e-05	0.000120734	0	4.02447e-05	0	4.02447e-05	8.04894e-05	4.02447e-05
OTU_12182	k__Bacteria; p__Actinobacteria; c__Actinobacteria; o__Actinomycetales; f__Microbacteriaceae; g__Candidatus Aquiluna; s__rubra	0	8.04894e-05	0	0.000120734	4.02447e-05	0.000120734	0	4.02447e-05	0.000120734	0.00185126	0.0015293	0.00165003	0	8.04894e-05	0.000201223	0	0	0	4.02447e-05	0.000160979	0	0.000362202	0.000402447	0.000402447	0.000523181	0.000201223	0.000402447	0	4.02447e-05	0.000160979	0.000120734	0.000201223	4.02447e-05	0	0	0	0	4.02447e-05	0	0	0	4.02447e-05	0	0	4.02447e-05	0	0	0
OTU_381	k__Bacteria; p__Bacteroidetes; c__Cytophagia; o__Cytophagales; f__Cytophagaceae; g__Emticicia; s__	0.00060367	0.000523181	0.00120734	0.000120734	0.000201223	0.000160979	0.000160979	8.04894e-05	0.000160979	0.000643915	0.000241468	0.000201223	4.02447e-05	0.000120734	8.04894e-05	8.04894e-05	0	4.02447e-05	4.02447e-05	0	0	0.000523181	0.00100612	0.00144881	0.000160979	0.000201223	8.04894e-05	4.02447e-05	0	4.02447e-05	8.04894e-05	0	8.04894e-05	0	4.02447e-05	4.02447e-05	8.04894e-05	4.02447e-05	0	8.04894e-05	0.000120734	0	0.000201223	0	0	0.000241468	0.000120734	4.02447e-05
OTU_14908	k__Bacteria; p__Bacteroidetes; c__Cytophagia; o__Cytophagales; f__Cyclobacteriaceae; g__; s__	4.02447e-05	8.04894e-05	0.000120734	8.04894e-05	4.02447e-05	4.02447e-05	0.000241468	0.000160979	4.02447e-05	0	0	4.02447e-05	0.000120734	4.02447e-05	0.000201223	4.02447e-05	8.04894e-05	0.000120734	0	4.02447e-05	0	0	0	0	0	0	4.02447e-05	0.000120734	0	4.02447e-05	4.02447e-05	0.000281713	8.04894e-05	8.04894e-05	0	4.02447e-05	0.000241468	0.000281713	0.000281713	0.000885383	0.00124759	0.0011671	0.000321958	0.000563426	0.000442692	0.000482936	0.000160979	0.000482936
OTU_362	k__Bacteria; p__Firmicutes; c__Clostridia; o__Clostridiales; f__Clostridiaceae; g__Clostridium	4.02447e-05	4.02447e-05	0.000201223	4.02447e-05	0.000160979	0.000120734	4.02447e-05	8.04894e-05	4.02447e-05	4.02447e-05	0	8.04894e-05	8.04894e-05	8.04894e-05	0.000120734	8.04894e-05	0.000120734	0.000120734	4.02447e-05	8.04894e-05	4.02447e-05	0.000321958	0.000201223	8.04894e-05	0.000965873	0.000724404	0.000925628	0	0.000402447	0.000120734	4.02447e-05	4.02447e-05	8.04894e-05	0.000241468	0.000201223	8.04894e-05	0.000201223	8.04894e-05	0.00177077	4.02447e-05	4.02447e-05	0.000120734	0.000201223	4.02447e-05	0.000160979	0.000120734	0	8.04894e-05
OTU_316	k__Bacteria; p__Proteobacteria; c__Gammaproteobacteria; o__HTCC2188; f__HTCC2089; g__; s__	0	4.02447e-05	0.000120734	8.04894e-05	4.02447e-05	0	4.02447e-05	4.02447e-05	0	0	0	0	0	0	0	4.02447e-05	4.02447e-05	0	0	0	0	0	4.02447e-05	0	0	0	0	0	4.02447e-05	4.02447e-05	0	4.02447e-05	4.02447e-05	0	0.000120734	0.000120734	0.00169028	0.00120734	0.00128783	0.000281713	0.000442692	0.000160979	0.000804894	0.00104636	0.00104636	4.02447e-05	4.02447e-05	4.02447e-05
OTU_307	k__Bacteria; p__Cyanobacteria; c__Chloroplast; o__Stramenopiles; f__; g__; s__	0.00120734	0.000402447	0.00060367	0.000201223	0.000402447	0.000201223	0.000402447	0.000563426	0.000482936	0	0	4.02447e-05	0	0	0.000201223	0.000201223	0.000281713	0.000201223	0	4.02447e-05	0	0	4.02447e-05	0	0	0	0	0.000160979	8.04894e-05	4.02447e-05	0.000321958	0.000442692	0.000362202	0.000643915	0.000362202	0.000402447	4.02447e-05	0	0.000160979	0.000120734	8.04894e-05	0.000120734	8.04894e-05	0	0	8.04894e-05	0	0
OTU_310	k__Bacteria; p__Bacteroidetes; c__[Saprospirae]; o__[Saprospirales]; f__Chitinophagaceae; g__; s__	0.000402447	0.000201223	0.000442692	0.000120734	4.02447e-05	0.000281713	0.000160979	0.000241468	0.000201223	0	4.02447e-05	0	4.02447e-05	0.000201223	0	0.000321958	0.000201223	0.000201223	0	4.02447e-05	4.02447e-05	0.000120734	0	0	0	4.02447e-05	0	0	4.02447e-05	4.02447e-05	0	4.02447e-05	0	0.000160979	4.02447e-05	0.000160979	0	0	0	0	8.04894e-05	0	0	0	0	4.02447e-05	4.02447e-05	0
OTU_332	k__Bacteria; p__Firmicutes; c__Bacilli; o__Lactobacillales; f__Lactobacillaceae; g__Lactobacillus; s__	0.000201223	0.000201223	0.000241468	0.000201223	0.000120734	0.000241468	0.000120734	0.000120734	0	0.000241468	4.02447e-05	0	8.04894e-05	8.04894e-05	0.000120734	0	8.04894e-05	0.000160979	0.000120734	8.04894e-05	0.000201223	8.04894e-05	0.000160979	8.04894e-05	0.000160979	0.000160979	0.000402447	4.02447e-05	4.02447e-05	0.000120734	0.000120734	0.000120734	8.04894e-05	0.000241468	0.000160979	0.000201223	0.000201223	0.000201223	0.00165003	0	8.04894e-05	0.000160979	0.000281713	0.000281713	0.000241468	0.000160979	0.000120734	0.000120734
OTU_313	k__Bacteria; p__Proteobacteria; c__Gammaproteobacteria; o__Alteromonadales; f__HTCC2188; g__HTCC; s__	0	4.02447e-05	4.02447e-05	0	4.02447e-05	4.02447e-05	0	0.000120734	8.04894e-05	0	0	0	0	0	8.04894e-05	8.04894e-05	0	8.04894e-05	0	0	0	0	0	4.02447e-05	0	0	4.02447e-05	4.02447e-05	0	0	8.04894e-05	0	0	0	0	0	0.000724404	0.000482936	0.000764649	0.000120734	0.000201223	4.02447e-05	0.000523181	0.00104636	0.00148905	0.000241468	0.000241468	0.000362202
OTU_11146	k__Bacteria; p__Proteobacteria; c__Gammaproteobacteria; o__Pseudomonadales; f__Moraxellaceae; g__Acinetobacter; s__	0	0.000201223	0	0.000201223	0.000965873	0.000845138	4.02447e-05	0	8.04894e-05	0	0	4.02447e-05	0.000160979	0.0022537	0.000965873	4.02447e-05	8.04894e-05	8.04894e-05	0.000160979	4.02447e-05	0.000925628	0	4.02447e-05	0	0.000201223	4.02447e-05	0.000120734	0.000643915	8.04894e-05	4.02447e-05	0	4.02447e-05	4.02447e-05	0	4.02447e-05	0	0	4.02447e-05	0	0	4.02447e-05	4.02447e-05	4.02447e-05	0	0	0	4.02447e-05	8.04894e-05
OTU_330	k__Bacteria; p__Planctomycetes; c__Planctomycetia; o__Pirellulales; f__Pirellulaceae; g__; s__	0.000120734	0	4.02447e-05	0	0	0	0	0	0	0	0	0	0	0	0	4.02447e-05	0	0	4.02447e-05	0.000120734	4.02447e-05	4.02447e-05	4.02447e-05	0	8.04894e-05	0	0	0	4.02447e-05	0.000120734	4.02447e-05	0	0	0	0	4.02447e-05	0.00229395	0.00144881	0.00112685	0.000362202	0.000120734	8.04894e-05	0.00128783	0.000402447	0.000482936	0.000120734	0.000160979	0.000120734
OTU_326	k__Bacteria; p__Bacteroidetes; c__Flavobacteriia; o__Flavobacteriales; f__Flavobacteriaceae; g__Flavobacterium; s__	0.00128783	0.000281713	0.000402447	0.000321958	0.000160979	0.000160979	8.04894e-05	0.000241468	4.02447e-05	0.000281713	8.04894e-05	0.000241468	8.04894e-05	4.02447e-05	0	8.04894e-05	0.000160979	4.02447e-05	0.000281713	0.000281713	0.000563426	0.000362202	0.000281713	0.000402447	0.000362202	0.000120734	0.000201223	8.04894e-05	8.04894e-05	0.000321958	4.02447e-05	4.02447e-05	4.02447e-05	0.000120734	0.000402447	8.04894e-05	4.02447e-05	8.04894e-05	0	4.02447e-05	4.02447e-05	0	0	4.02447e-05	0	8.04894e-05	8.04894e-05	4.02447e-05
OTU_441	k__Bacteria; p__Actinobacteria; c__Actinobacteria; o__Actinomycetales; f__Microbacteriaceae; g__Microbacterium; s__	8.04894e-05	0	4.02447e-05	8.04894e-05	0.000120734	0.000120734	0.000160979	0	0.000120734	0	4.02447e-05	0	0.000201223	8.04894e-05	8.04894e-05	8.04894e-05	4.02447e-05	4.02447e-05	4.02447e-05	8.04894e-05	4.02447e-05	8.04894e-05	4.02447e-05	4.02447e-05	0.00124759	0.000321958	0.0011671	4.02447e-05	0.000201223	0.000120734	0	0.000241468	0	4.02447e-05	0.000201223	8.04894e-05	0.000201223	0.000321958	0.000321958	8.04894e-05	8.04894e-05	4.02447e-05	0.00136832	0	8.04894e-05	0.000120734	4.02447e-05	0.000201223
OTU_352	k__Bacteria; p__Proteobacteria; c__Gammaproteobacteria; o__Chromatiales; f__; g__; s__	0.000160979	0	0	0	8.04894e-05	0	0.000120734	8.04894e-05	0.000120734	0	0	0	4.02447e-05	0	0	4.02447e-05	8.04894e-05	0.000160979	0	0	0	0	0	0	0	0	0	8.04894e-05	4.02447e-05	0	4.02447e-05	4.02447e-05	4.02447e-05	0	4.02447e-05	0	0.00140856	0.00068416	0.00124759	0.000362202	0.000321958	0.000321958	0.000845138	0.000362202	0.00108661	8.04894e-05	0.000160979	0.000160979
OTU_6099	k__Bacteria; p__Proteobacteria; c__Betaproteobacteria; o__Neisseriales; f__Neisseriaceae; g__Vogesella; s__	0.000160979	8.04894e-05	8.04894e-05	0	0	4.02447e-05	4.02447e-05	0.000120734	0	0.000201223	0	8.04894e-05	0.000241468	0.000442692	0	4.02447e-05	0	0.000120734	0.00112685	0.000764649	0.00293786	4.02447e-05	0	4.02447e-05	0	0.000120734	0	8.04894e-05	8.04894e-05	4.02447e-05	0	0	0	0	0	8.04894e-05	4.02447e-05	0	8.04894e-05	0	4.02447e-05	8.04894e-05	8.04894e-05	0	0	0.000362202	0.000120734	0.00068416
OTU_12407	k__Bacteria; p__Proteobacteria; c__Alphaproteobacteria; o__Sphingomonadales; f__; g__; s__	0	0.000120734	0.000120734	0.000201223	0.000482936	8.04894e-05	0	8.04894e-05	0.000201223	0	0	0	8.04894e-05	0.000160979	4.02447e-05	0.000201223	0.000201223	4.02447e-05	0.000120734	4.02447e-05	0.000120734	0.000321958	0.000201223	8.04894e-05	0.00165003	0.000885383	0.00108661	0.000241468	0.000160979	0.000281713	8.04894e-05	4.02447e-05	4.02447e-05	0.000241468	0.000120734	0	0.000201223	8.04894e-05	0	0	4.02447e-05	4.02447e-05	8.04894e-05	0	0	0	4.02447e-05	4.02447e-05
OTU_545	k__Bacteria; p__Proteobacteria; c__Alphaproteobacteria; o__Rhizobiales; f__Phyllobacteriaceae; g__; s__	0	8.04894e-05	0.000160979	0.000160979	0.000160979	0.000120734	4.02447e-05	8.04894e-05	0.000241468	0	0	0	0	8.04894e-05	0.000201223	4.02447e-05	4.02447e-05	0.000241468	0.000160979	0.000160979	4.02447e-05	0.000120734	0.000120734	0.000281713	0.00140856	0.000845138	0.00128783	8.04894e-05	0.000281713	0.000241468	8.04894e-05	0.000201223	4.02447e-05	0.000120734	8.04894e-05	4.02447e-05	8.04894e-05	4.02447e-05	0	4.02447e-05	0	4.02447e-05	8.04894e-05	4.02447e-05	0	0.000120734	0	4.02447e-05
OTU_312	k__Bacteria; p__Proteobacteria; c__Betaproteobacteria; o__Neisseriales; f__Neisseriaceae	0.000281713	0.000724404	0.000362202	0.000281713	0.000442692	0.000482936	0.000160979	0.000321958	0.000362202	0	0	0	4.02447e-05	4.02447e-05	4.02447e-05	0.000120734	4.02447e-05	0.000160979	8.04894e-05	8.04894e-05	4.02447e-05	0	0	0	0	0	0	8.04894e-05	0	0.000120734	0.000120734	0	0	0.000120734	0	0	4.02447e-05	0.000160979	4.02447e-05	8.04894e-05	8.04894e-05	0	0.000925628	0.00068416	0.00112685	0.000241468	0.000201223	0.000120734
OTU_353	k__Bacteria; p__Bacteroidetes; c__[Saprospirae]; o__[Saprospirales]; f__Chitinophagaceae; g__Parasegitibacter; s__luojiensis	0	0.000120734	0	4.02447e-05	0.000160979	0.000120734	0.000120734	4.02447e-05	0.000201223	4.02447e-05	4.02447e-05	0.000160979	8.04894e-05	0.000160979	0.000120734	8.04894e-05	0.000120734	0.000120734	0.000523181	0.00108661	0.000764649	0.000160979	8.04894e-05	0.000160979	0.00060367	0.000281713	0.000442692	4.02447e-05	0.000160979	0.000120734	0.000120734	8.04894e-05	0.000120734	8.04894e-05	0.000241468	8.04894e-05	0.000241468	0.000160979	8.04894e-05	4.02447e-05	0	8.04894e-05	4.02447e-05	0.000120734	0.000160979	4.02447e-05	0	0.000160979
OTU_12613	k__Bacteria; p__Proteobacteria; c__Betaproteobacteria; o__Neisseriales; f__Neisseriaceae; g__Vogesella; s__	0.000120734	0	0	0	0	0	0	0	0	4.02447e-05	0	0	0.000160979	0.000442692	8.04894e-05	0	4.02447e-05	0	0.00169028	0.00156954	0.00221346	0	0	0	0	0	0	0.000120734	4.02447e-05	4.02447e-05	0	0	4.02447e-05	0	0	0	4.02447e-05	0	0	0	0	0	0	4.02447e-05	0	8.04894e-05	4.02447e-05	0.00136832
OTU_1529	k__Bacteria; p__Proteobacteria; c__Gammaproteobacteria; o__Xanthomonadales; f__Xanthomonadaceae; g__Lysobacter; s__	4.02447e-05	0.000120734	4.02447e-05	0	4.02447e-05	8.04894e-05	4.02447e-05	0	8.04894e-05	0	0	0	8.04894e-05	8.04894e-05	8.04894e-05	0	8.04894e-05	8.04894e-05	0.00160979	0.00177077	0.000804894	0	0	4.02447e-05	0.000321958	8.04894e-05	0.000160979	0.000201223	0.000281713	0.000201223	0	0	4.02447e-05	0	0.000160979	0.000201223	0	0.000120734	0.000120734	8.04894e-05	0	0	0.000160979	0.000120734	0	0.000241468	0	0.000160979
OTU_11714	k__Bacteria; p__Firmicutes; c__Bacilli; o__Bacillales; f__[Exiguobacteraceae]; g__Exiguobacterium; s__	8.04894e-05	4.02447e-05	0.000281713	0.000120734	0.000402447	8.04894e-05	8.04894e-05	8.04894e-05	0.000241468	4.02447e-05	0	4.02447e-05	8.04894e-05	0	0.000120734	0.000120734	0.000120734	4.02447e-05	4.02447e-05	4.02447e-05	0	8.04894e-05	0	4.02447e-05	0.000281713	0.000160979	0.00100612	0.00104636	0.00112685	0.00136832	0	0	0	0	4.02447e-05	8.04894e-05	0.000201223	8.04894e-05	8.04894e-05	4.02447e-05	0	0	0	0	4.02447e-05	8.04894e-05	4.02447e-05	4.02447e-05
OTU_346	k__Bacteria; p__Proteobacteria; c__Betaproteobacteria; o__Rhodocyclales; f__Rhodocyclaceae; g__C39; s__	0	8.04894e-05	0	0	4.02447e-05	8.04894e-05	0	0	4.02447e-05	4.02447e-05	8.04894e-05	0	0.000402447	0.000160979	0.000845138	0	4.02447e-05	0	0	0	0	4.02447e-05	0	4.02447e-05	0	0	0.000120734	0	4.02447e-05	0	4.02447e-05	4.02447e-05	0	0	8.04894e-05	4.02447e-05	0	0	0	0	0	0	0	0	0	0	0	0.000120734
OTU_369	k__Bacteria; p__Proteobacteria; c__Alphaproteobacteria; o__; f__; g__; s__	0.000321958	8.04894e-05	0.000241468	0.000120734	8.04894e-05	4.02447e-05	4.02447e-05	8.04894e-05	0.000281713	0	0	0	4.02447e-05	4.02447e-05	0.000120734	4.02447e-05	0.000120734	0	0	0	0	0	0	0	0	0	0	4.02447e-05	4.02447e-05	0	4.02447e-05	0	8.04894e-05	0.000201223	0.000160979	0.000160979	0.0011671	0.0015293	0.000965873	0.000201223	0.000160979	0.000201223	0.000482936	0.000120734	0.000281713	4.02447e-05	8.04894e-05	4.02447e-05
OTU_363	k__Bacteria; p__Proteobacteria; c__Deltaproteobacteria; o__Myxococcales; f__OM27; g__; s__	0.000402447	0.000201223	0.000120734	0.000160979	4.02447e-05	8.04894e-05	8.04894e-05	8.04894e-05	0.000362202	0	0	0	0.000160979	0	8.04894e-05	0	0.000201223	0.000160979	0	0	0	0	0	0	0	0	0	0	8.04894e-05	0	8.04894e-05	4.02447e-05	0	8.04894e-05	4.02447e-05	0	0.0011671	0.000764649	0.000402447	0	0.000120734	8.04894e-05	0.000764649	0.000321958	0.000804894	8.04894e-05	0.000201223	0.000201223
OTU_354	k__Bacteria; p__Planctomycetes; c__Phycisphaerae; o__Phycisphaerales; f__; g__; s__	4.02447e-05	4.02447e-05	0	0.000120734	0.000120734	0.000120734	0.000241468	0.000120734	0.000402447	0	0	0	4.02447e-05	8.04894e-05	0.000120734	8.04894e-05	0	8.04894e-05	4.02447e-05	0	0	0	4.02447e-05	0	0	0	4.02447e-05	8.04894e-05	0.000120734	0	0.000241468	0	4.02447e-05	0.000160979	0	8.04894e-05	0.000201223	0.000442692	0.000241468	4.02447e-05	0	0.000160979	0.0011671	0.00100612	0.00132807	4.02447e-05	0.000201223	0.000201223
OTU_11496	k__Bacteria; p__Cyanobacteria; c__Chloroplast; o__Haptophyceae; f__; g__; s__	0	0	4.02447e-05	8.04894e-05	0.000120734	0.000120734	0.000120734	4.02447e-05	0	0	0	0	4.02447e-05	0	4.02447e-05	8.04894e-05	8.04894e-05	0	0	0	0	8.04894e-05	0	4.02447e-05	0	0	0	0.000160979	4.02447e-05	4.02447e-05	0	0	8.04894e-05	0	0	4.02447e-05	0.000160979	0	8.04894e-05	0.000724404	0.00136832	0.00112685	0.000925628	0.000563426	0.000885383	0.000281713	8.04894e-05	0.000120734
OTU_350	k__Bacteria; p__Bacteroidetes; c__Sphingobacteriia; o__Sphingobacteriales; f__; g__; s__	0.000241468	0.000201223	0.000120734	0.000160979	8.04894e-05	0	8.04894e-05	0.000120734	0.000160979	0	0	0	8.04894e-05	8.04894e-05	4.02447e-05	0	0.000120734	8.04894e-05	0	0.000160979	0	0	0	0	0	4.02447e-05	0	8.04894e-05	8.04894e-05	0.000120734	8.04894e-05	0.000120734	4.02447e-05	0.00169028	0.000804894	0.00132807	0.000201223	0.000120734	4.02447e-05	0	4.02447e-05	4.02447e-05	0.000241468	4.02447e-05	8.04894e-05	0	4.02447e-05	0
OTU_370	k__Bacteria; p__Verrucomicrobia; c__Opitutae; o__Opitutales; f__Opitutaceae; g__; s__	8.04894e-05	0	4.02447e-05	0.000120734	0.000120734	0.000120734	0.000120734	8.04894e-05	0.000321958	0	0	4.02447e-05	8.04894e-05	0	0.000160979	4.02447e-05	0.000321958	0.000321958	0	8.04894e-05	0	0.000321958	0.000241468	0.000160979	8.04894e-05	0.000120734	4.02447e-05	8.04894e-05	0	8.04894e-05	0.000201223	4.02447e-05	0.000160979	8.04894e-05	0.000281713	0.000160979	4.02447e-05	0.000120734	0.000201223	4.02447e-05	0	0	8.04894e-05	4.02447e-05	0	4.02447e-05	0	0
OTU_9118	k__Bacteria; p__Actinobacteria; c__Actinobacteria; o__Actinomycetales; f__Nocardioidaceae; g__; s__	0	4.02447e-05	4.02447e-05	0	0.000120734	0	0	4.02447e-05	4.02447e-05	4.02447e-05	4.02447e-05	4.02447e-05	0.000120734	0	0	0	4.02447e-05	4.02447e-05	8.04894e-05	0.00060367	0.000160979	0	0	0	0.000362202	0.0011671	0.000281713	0.000201223	0.000201223	0.000241468	8.04894e-05	0	0	0.000402447	0.000201223	0.000523181	0	4.02447e-05	4.02447e-05	0.000120734	0	0	0.000442692	0.000281713	0	4.02447e-05	0	8.04894e-05
OTU_260	k__Bacteria; p__Proteobacteria; c__Betaproteobacteria; o__Neisseriales; f__Neisseriaceae; g__Vogesella; s__	8.04894e-05	4.02447e-05	4.02447e-05	0	0	0	0	0	0	4.02447e-05	0	0.000120734	0.000241468	0.000523181	0	4.02447e-05	0	0	0.00124759	0.00124759	0.00177077	8.04894e-05	0	0	0	0	0	8.04894e-05	0	0	0	4.02447e-05	0	0	4.02447e-05	0	4.02447e-05	0	0	4.02447e-05	0	0	8.04894e-05	0	8.04894e-05	0.000321958	8.04894e-05	0.00108661
OTU_19609	k__Bacteria; p__Bacteroidetes; c__Flavobacteriia; o__Flavobacteriales; f__Flavobacteriaceae; g__Flavobacterium; s__succinicans	0.000120734	8.04894e-05	8.04894e-05	4.02447e-05	0	0	8.04894e-05	0	0	0	8.04894e-05	0	4.02447e-05	8.04894e-05	0.000160979	4.02447e-05	4.02447e-05	0	0	0	8.04894e-05	0.00060367	0.00124759	0.00124759	8.04894e-05	0.000160979	0	8.04894e-05	0	0.000120734	0.000120734	4.02447e-05	4.02447e-05	0	4.02447e-05	4.02447e-05	0	4.02447e-05	0	0.000120734	0.000120734	4.02447e-05	4.02447e-05	0.000281713	4.02447e-05	4.02447e-05	0.000201223	8.04894e-05
OTU_323	k__Bacteria; p__Proteobacteria; c__Gammaproteobacteria	0.000764649	0.000201223	0.000402447	0	4.02447e-05	4.02447e-05	0.000321958	0.000160979	0.000281713	0.00060367	0.00060367	0.00100612	0.000160979	0	0.000120734	8.04894e-05	0.000120734	0.000241468	0	4.02447e-05	0	0	8.04894e-05	8.04894e-05	0	0	0	0	4.02447e-05	8.04894e-05	0.000321958	0	4.02447e-05	0.000120734	0	4.02447e-05	0.000201223	4.02447e-05	0.000120734	0	4.02447e-05	0	0.000241468	0.000120734	0.000321958	4.02447e-05	8.04894e-05	4.02447e-05
OTU_359	k__Bacteria; p__Proteobacteria; c__Betaproteobacteria; o__Neisseriales; f__Neisseriaceae; g__Deefgea; s__	0.00112685	0.000764649	0.000523181	4.02447e-05	0.000201223	0.000120734	4.02447e-05	8.04894e-05	8.04894e-05	4.02447e-05	0	4.02447e-05	0.000201223	8.04894e-05	0.000201223	8.04894e-05	0.000120734	0.000160979	0	0	0	0.000120734	0.000160979	4.02447e-05	0.000281713	4.02447e-05	0.000201223	0.000241468	0.000281713	0.000160979	8.04894e-05	0.000120734	4.02447e-05	0.000120734	4.02447e-05	0	4.02447e-05	0.000160979	4.02447e-05	0	4.02447e-05	0	0	4.02447e-05	8.04894e-05	0.000120734	0	0
OTU_388	k__Bacteria; p__Proteobacteria; c__Alphaproteobacteria; o__Rhizobiales; f__; g__; s__	8.04894e-05	4.02447e-05	4.02447e-05	8.04894e-05	0.000201223	0.000160979	0	0	0.000241468	0	0	0	8.04894e-05	8.04894e-05	4.02447e-05	0	0.000120734	0.000160979	0.000241468	0.000160979	8.04894e-05	0.000120734	0.000120734	0.000241468	0.00128783	0.000845138	0.00120734	0.000241468	0.000362202	0.000321958	0	4.02447e-05	0	0.000201223	0.000201223	0	0	4.02447e-05	8.04894e-05	0	0	0	0	0	0	0	0	0
OTU_19635	k__Bacteria; p__Bacteroidetes; c__Flavobacteriia; o__Flavobacteriales; f__Flavobacteriaceae; g__Flavobacterium; s__succinicans	8.04894e-05	8.04894e-05	4.02447e-05	0	0	4.02447e-05	4.02447e-05	0	4.02447e-05	4.02447e-05	0	0	0.000120734	0	0.000160979	4.02447e-05	8.04894e-05	8.04894e-05	0	0.000120734	8.04894e-05	0.00108661	0.000402447	0.000925628	0.000120734	8.04894e-05	8.04894e-05	0.000201223	4.02447e-05	4.02447e-05	8.04894e-05	0.000120734	4.02447e-05	4.02447e-05	0	8.04894e-05	0	8.04894e-05	0	0.000201223	4.02447e-05	0.000120734	0.000120734	8.04894e-05	0.000160979	0.000281713	0.000281713	0.000241468
OTU_387	k__Bacteria; p__Proteobacteria	0	0	0	4.02447e-05	4.02447e-05	4.02447e-05	4.02447e-05	0.000120734	0	0	0	0	0	4.02447e-05	0	4.02447e-05	4.02447e-05	4.02447e-05	0	0	0	0.000120734	0	0	0	0	0	0	0	0	0	0	0	0	0	0	0.00060367	0.000643915	0.000482936	0.000563426	0.000201223	0.000643915	0.00112685	0.000965873	0.000925628	0	8.04894e-05	8.04894e-05
OTU_3177	k__Bacteria; p__Cyanobacteria; c__Chloroplast; o__Stramenopiles; f__; g__; s__	4.02447e-05	4.02447e-05	0	0.000160979	0.000160979	0.000201223	0.000160979	8.04894e-05	8.04894e-05	0	0	0	0	8.04894e-05	4.02447e-05	0.000160979	0.000321958	0.000523181	8.04894e-05	0	0	0.00112685	0.00104636	0.00100612	0	4.02447e-05	0.000201223	0.000201223	0.000160979	0.000120734	0	4.02447e-05	4.02447e-05	0	4.02447e-05	4.02447e-05	0	8.04894e-05	4.02447e-05	0	0	0	0.000120734	0	4.02447e-05	0	0	0
OTU_18365	k__Bacteria; p__Cyanobacteria; c__Synechococcophycideae; o__Synechococcales; f__Chamaesiphonaceae; g__; s__	0	8.04894e-05	0	0.000201223	0.000362202	8.04894e-05	0	4.02447e-05	0.000241468	4.02447e-05	0	0	8.04894e-05	0.000281713	8.04894e-05	0.000120734	0.000201223	0.000442692	0	0.000201223	0	0.000321958	0.000120734	0.00068416	0.00108661	0.000321958	0.00068416	0.000160979	8.04894e-05	0.000241468	0.000120734	0	0	0	0	0	8.04894e-05	0	0	0	8.04894e-05	0	0.000321958	4.02447e-05	4.02447e-05	0	0	0
OTU_403	k__Bacteria; p__Firmicutes; c__Clostridia; o__Clostridiales; f__Peptostreptococcaceae; g__; s__	0	0	8.04894e-05	0	0	0	8.04894e-05	0	0	0	0	4.02447e-05	4.02447e-05	8.04894e-05	4.02447e-05	4.02447e-05	0.000120734	4.02447e-05	8.04894e-05	4.02447e-05	0	0.000160979	0.000120734	4.02447e-05	0.00060367	0.000724404	0.00100612	8.04894e-05	8.04894e-05	0	0	0	0	0	4.02447e-05	8.04894e-05	0.000160979	0.000160979	0.00193175	8.04894e-05	4.02447e-05	0	0.000281713	0	0.000160979	4.02447e-05	4.02447e-05	0
OTU_438	k__Bacteria; p__Proteobacteria; c__Gammaproteobacteria; o__Pseudomonadales; f__Moraxellaceae; g__Agitococcus; s__lubricus	8.04894e-05	0.000120734	0	8.04894e-05	4.02447e-05	8.04894e-05	0	8.04894e-05	4.02447e-05	0	4.02447e-05	0	0.000120734	4.02447e-05	0.000160979	0	0.000120734	4.02447e-05	0	4.02447e-05	0	0	0	4.02447e-05	0	0	4.02447e-05	0.00144881	0.000201223	4.02447e-05	0.000281713	0.000120734	0	0.000120734	4.02447e-05	8.04894e-05	0.000241468	0.000160979	0.0015293	0	4.02447e-05	0	4.02447e-05	0.000523181	0	4.02447e-05	0	0
OTU_11143	k__Bacteria; p__Proteobacteria; c__Alphaproteobacteria; o__Sphingomonadales; f__Sphingomonadaceae; g__Novosphingobium; s__	4.02447e-05	4.02447e-05	0	0	0	4.02447e-05	4.02447e-05	0	4.02447e-05	4.02447e-05	4.02447e-05	0.000201223	0.000120734	0.000281713	0.000120734	4.02447e-05	0	8.04894e-05	0	8.04894e-05	0	0.00148905	0.00165003	0.000804894	8.04894e-05	4.02447e-05	0.000321958	4.02447e-05	4.02447e-05	0	8.04894e-05	0	0.000201223	0.000120734	0	4.02447e-05	0	0	4.02447e-05	0	4.02447e-05	8.04894e-05	0.000201223	4.02447e-05	0	8.04894e-05	8.04894e-05	0
OTU_11	k__Bacteria; p__Verrucomicrobia; c__Opitutae; o__[Cerasicoccales]; f__[Cerasicoccaceae]; g__; s__	4.02447e-05	0	0.000120734	4.02447e-05	8.04894e-05	0	4.02447e-05	4.02447e-05	4.02447e-05	0.00100612	0.000885383	0.000885383	0.000201223	0	0	4.02447e-05	0.000160979	4.02447e-05	0	4.02447e-05	0	4.02447e-05	0.000120734	0.000201223	0	0	0	4.02447e-05	0	4.02447e-05	0	8.04894e-05	0	0	8.04894e-05	4.02447e-05	0.000120734	4.02447e-05	0	0	8.04894e-05	0	4.02447e-05	0	8.04894e-05	0	0	0.000120734
OTU_423	k__Bacteria; p__Proteobacteria; c__Betaproteobacteria; o__Burkholderiales; f__Alcaligenaceae; g__; s__	0	0	8.04894e-05	8.04894e-05	4.02447e-05	8.04894e-05	4.02447e-05	0	0.000120734	4.02447e-05	8.04894e-05	0.000241468	0	0.000120734	0	0	8.04894e-05	0.000241468	4.02447e-05	0	8.04894e-05	0.000241468	8.04894e-05	8.04894e-05	0.00068416	0.000563426	0.00104636	8.04894e-05	0.000281713	4.02447e-05	0	8.04894e-05	8.04894e-05	0.000160979	0.000160979	0	0	0.000362202	8.04894e-05	0	0	0	4.02447e-05	0	0	8.04894e-05	0	8.04894e-05
OTU_11132	k__Bacteria; p__Planctomycetes; c__Planctomycetia; o__Pirellulales; f__Pirellulaceae; g__; s__	0.00060367	0.00104636	0.000764649	8.04894e-05	0.000120734	4.02447e-05	0.000160979	8.04894e-05	0.000201223	0.00068416	0.000362202	0.000402447	4.02447e-05	0.000160979	8.04894e-05	0.000201223	0.000241468	0.000201223	4.02447e-05	0.000160979	4.02447e-05	8.04894e-05	0	0	0	0	4.02447e-05	8.04894e-05	4.02447e-05	4.02447e-05	0.000120734	0	0.000120734	8.04894e-05	4.02447e-05	0.000120734	4.02447e-05	0	0	0	0	0	8.04894e-05	0	0	0	0	0
OTU_442	k__Bacteria; p__Proteobacteria; c__Gammaproteobacteria; o__Xanthomonadales; f__Xanthomonadaceae; g__; s__	0.000120734	8.04894e-05	4.02447e-05	0.000120734	8.04894e-05	0.000120734	8.04894e-05	8.04894e-05	0.000160979	0.000160979	0	4.02447e-05	8.04894e-05	4.02447e-05	4.02447e-05	4.02447e-05	0.000120734	0.000241468	0	4.02447e-05	8.04894e-05	0.000201223	0.000160979	0.000201223	0.000241468	0.00108661	0.000160979	0.000120734	0.000482936	0.000442692	4.02447e-05	4.02447e-05	0	0.000241468	0.000523181	8.04894e-05	0	4.02447e-05	8.04894e-05	4.02447e-05	4.02447e-05	0	0	0.000120734	0	4.02447e-05	0	0
OTU_399	k__Bacteria; p__Cyanobacteria; c__Chloroplast; o__Chlorophyta; f__; g__; s__	0	0	4.02447e-05	4.02447e-05	0	0	0	0	0	4.02447e-05	0	0	0	4.02447e-05	0	0	0	4.02447e-05	0.000120734	8.04894e-05	4.02447e-05	0	0.000201223	0	0	0	0	0	0	0	8.04894e-05	0	0	0	0	0	0.000362202	0.000201223	0.000643915	0.00060367	0.000442692	0.000321958	0.00128783	0.000362202	0.000804894	0.000160979	0.000160979	8.04894e-05
OTU_355	k__Bacteria; p__Proteobacteria; c__Deltaproteobacteria; o__Myxococcales; f__Cystobacteraceae; g__; s__	0	0	0	0	0	4.02447e-05	0	0	0.000120734	0	0	0	4.02447e-05	0	0	4.02447e-05	0	0.000120734	4.02447e-05	0	0	0	0	0	0	0	0	4.02447e-05	0	0	0.000160979	0	0.000120734	4.02447e-05	8.04894e-05	4.02447e-05	0.000281713	0.000241468	0.000281713	0.000241468	8.04894e-05	0.000120734	0.00120734	0.000442692	0.00124759	0.000201223	0.000281713	8.04894e-05
OTU_11752	k__Bacteria; p__Proteobacteria; c__Alphaproteobacteria; o__Sphingomonadales; f__; g__; s__	0.000160979	4.02447e-05	0.000201223	0.000160979	0.000120734	4.02447e-05	8.04894e-05	0	0.000160979	0	0	0	0.000160979	8.04894e-05	0	4.02447e-05	8.04894e-05	8.04894e-05	4.02447e-05	0	0	0	4.02447e-05	4.02447e-05	0.00185126	0.000442692	0.00104636	8.04894e-05	0.000201223	8.04894e-05	0.000120734	0.000160979	8.04894e-05	0.000160979	4.02447e-05	4.02447e-05	8.04894e-05	4.02447e-05	4.02447e-05	0	0.000120734	0	8.04894e-05	4.02447e-05	0	0	0	4.02447e-05
OTU_436	k__Bacteria; p__Actinobacteria; c__Acidimicrobiia; o__Acidimicrobiales; f__; g__; s__	4.02447e-05	0.000120734	0	4.02447e-05	0.000201223	8.04894e-05	0.000160979	0	8.04894e-05	4.02447e-05	0	8.04894e-05	0	0	8.04894e-05	0.000160979	0.000160979	0.000160979	4.02447e-05	0.000120734	4.02447e-05	0	8.04894e-05	4.02447e-05	0.000442692	0.00108661	0.000724404	8.04894e-05	0.000643915	0.000523181	8.04894e-05	8.04894e-05	0	0.000160979	0.000120734	0	4.02447e-05	8.04894e-05	0.000120734	4.02447e-05	4.02447e-05	0	0.000120734	0	4.02447e-05	0	0	0
OTU_426	k__Bacteria; p__Verrucomicrobia; c__[Pedosphaerae]; o__[Pedosphaerales]; f__R4-41B; g__; s__	0.00100612	0.000442692	0.000764649	0	4.02447e-05	0.000120734	0.000281713	0.000201223	0.000402447	0.000120734	0.000120734	0	0.000120734	0	8.04894e-05	8.04894e-05	0.000160979	0.000241468	4.02447e-05	0	4.02447e-05	0.000160979	0.000160979	0.000120734	8.04894e-05	4.02447e-05	0	0	4.02447e-05	4.02447e-05	4.02447e-05	0.000160979	0.000160979	4.02447e-05	0.000362202	0	0.000120734	8.04894e-05	4.02447e-05	0	4.02447e-05	0	8.04894e-05	0	0	0	0	0
OTU_477	k__Bacteria; p__Proteobacteria; c__Betaproteobacteria; o__Methylophilales; f__Methylophilaceae; g__; s__	0	0	0	0	4.02447e-05	0	0	0	0	8.04894e-05	8.04894e-05	4.02447e-05	0	0	0	0	0	0	0	4.02447e-05	4.02447e-05	4.02447e-05	4.02447e-05	0.000160979	0	0	0	4.02447e-05	0	0	0	0	4.02447e-05	0	0	0	4.02447e-05	8.04894e-05	0	0	0	0	0	0	0	0	0	4.02447e-05
OTU_13863	k__Bacteria; p__Proteobacteria; c__Alphaproteobacteria; o__Rhodobacterales; f__Rhodobacteraceae; g__Rhodobacter; s__	0	4.02447e-05	0	0	4.02447e-05	0	4.02447e-05	0	0	0	0	0	4.02447e-05	8.04894e-05	4.02447e-05	0	0	4.02447e-05	0.000523181	0.000160979	0.000321958	0	0	4.02447e-05	8.04894e-05	0.00173052	4.02447e-05	0	0.000241468	4.02447e-05	0	4.02447e-05	4.02447e-05	0.000241468	0.000160979	0	4.02447e-05	8.04894e-05	0	0	0	0	0.000120734	8.04894e-05	0	8.04894e-05	0.000160979	0.00136832
OTU_397	k__Bacteria; p__Proteobacteria; c__Alphaproteobacteria; o__Rhodobacterales; f__Rhodobacteraceae; g__Anaerospora; s__	4.02447e-05	8.04894e-05	4.02447e-05	8.04894e-05	0.000362202	4.02447e-05	4.02447e-05	8.04894e-05	0	0.000201223	8.04894e-05	0	4.02447e-05	4.02447e-05	0	0	0.000120734	4.02447e-05	8.04894e-05	0.000160979	8.04894e-05	4.02447e-05	4.02447e-05	0	0.00112685	0.000804894	0.000804894	0.000120734	0.000201223	8.04894e-05	0.000160979	0	0	8.04894e-05	0.000321958	4.02447e-05	4.02447e-05	0	0.000120734	0	4.02447e-05	0	4.02447e-05	0	0	0	0	0
OTU_471	k__Bacteria; p__Actinobacteria; c__Acidimicrobiia; o__Acidimicrobiales; f__; g__; s__	0.000201223	8.04894e-05	0.000120734	8.04894e-05	8.04894e-05	4.02447e-05	0	4.02447e-05	0	0	0	0	4.02447e-05	4.02447e-05	4.02447e-05	0	8.04894e-05	8.04894e-05	0	4.02447e-05	0	4.02447e-05	0	4.02447e-05	0	0	8.04894e-05	8.04894e-05	0.000281713	8.04894e-05	4.02447e-05	4.02447e-05	4.02447e-05	0.000160979	4.02447e-05	0.000241468	0.00100612	0.000482936	0.000764649	8.04894e-05	8.04894e-05	0.000120734	0.000321958	0.000160979	0.000241468	0.000160979	0.000201223	0
OTU_11192	k__Bacteria; p__Proteobacteria; c__Gammaproteobacteria; o__Pseudomonadales; f__Moraxellaceae; g__Acinetobacter; s__johnsonii	0	0	0	0	4.02447e-05	0	4.02447e-05	4.02447e-05	0	4.02447e-05	0	0	4.02447e-05	0.0026159	0.000482936	0	0	0	4.02447e-05	4.02447e-05	0.00108661	0	0	0	0	0.000281713	4.02447e-05	0.000362202	0	0	4.02447e-05	4.02447e-05	0	0	4.02447e-05	8.04894e-05	4.02447e-05	0	4.02447e-05	0	0	0	8.04894e-05	0	0	0	0	0.000362202
OTU_468	k__Bacteria; p__Proteobacteria; c__Gammaproteobacteria; o__Xanthomonadales; f__Xanthomonadaceae	4.02447e-05	0	4.02447e-05	0	0.000241468	0.000160979	4.02447e-05	4.02447e-05	0.000160979	0	0	4.02447e-05	0	8.04894e-05	0	0.000120734	0.000120734	0.000120734	0	4.02447e-05	4.02447e-05	0	0.000120734	0.000160979	0.00100612	0.00120734	0.000643915	0.000321958	0.000281713	0.000362202	4.02447e-05	4.02447e-05	4.02447e-05	8.04894e-05	8.04894e-05	0	0	0	0	0	0	4.02447e-05	0.000160979	0	0	0	0	0
OTU_14291	k__Bacteria; p__Proteobacteria; c__Betaproteobacteria; o__Neisseriales; f__Neisseriaceae; g__Vogesella; s__	4.02447e-05	0	4.02447e-05	0	0	0	0	0	0	8.04894e-05	0	4.02447e-05	8.04894e-05	0.000160979	0	0	0	0	0.00160979	0.00060367	0.00140856	0	0	0	4.02447e-05	0	0	0.000201223	8.04894e-05	4.02447e-05	4.02447e-05	0	4.02447e-05	0	0	0	0	0	4.02447e-05	4.02447e-05	0	0	4.02447e-05	0	0	0.000120734	0.000120734	0.000925628
OTU_398	k__Bacteria; p__Cyanobacteria; c__Chloroplast; o__Chlorophyta; f__Chlamydomonadaceae; g__; s__	4.02447e-05	4.02447e-05	0	4.02447e-05	0	4.02447e-05	0	0	8.04894e-05	0.00193175	0.000804894	0.00193175	0	0	0	0.000120734	4.02447e-05	0	0	0	0	8.04894e-05	0	0	0	0	0	0	8.04894e-05	4.02447e-05	8.04894e-05	4.02447e-05	0	0	0	4.02447e-05	4.02447e-05	0	4.02447e-05	0	0	4.02447e-05	0.000160979	0	4.02447e-05	0	0	0
OTU_411	k__Bacteria; p__Actinobacteria; c__Actinobacteria; o__Actinomycetales; f__Kineosporiaceae; g__; s__	0	0	4.02447e-05	8.04894e-05	4.02447e-05	0	0	0	0	4.02447e-05	0	0	0	8.04894e-05	0	8.04894e-05	4.02447e-05	0	0.00100612	0.0018915	0.000160979	0	0	0	0.000201223	0.000241468	0.000120734	8.04894e-05	8.04894e-05	8.04894e-05	4.02447e-05	0	0	4.02447e-05	0.000120734	8.04894e-05	0	8.04894e-05	0	0	0	4.02447e-05	8.04894e-05	8.04894e-05	0	0	4.02447e-05	8.04894e-05
OTU_380	k__Bacteria; p__Proteobacteria; c__Gammaproteobacteria; o__Pseudomonadales; f__Moraxellaceae; g__Perlucidibaca; s__	0	0	0	0	0	0	4.02447e-05	0	0	0	0	0	0	0	0	0	0	0	0	0	0	0	0	0	0	0	0	0	8.04894e-05	0.000281713	0	0	0	4.02447e-05	0.000402447	0.00281713	0	0	4.02447e-05	0.000362202	4.02447e-05	4.02447e-05	0.000281713	0.000321958	0.000120734	0.000482936	0	0
OTU_408	k__Bacteria; p__Proteobacteria; c__Gammaproteobacteria; o__Pseudomonadales; f__Moraxellaceae; g__Perlucidibaca; s__	0	4.02447e-05	4.02447e-05	0.000201223	0	8.04894e-05	0	0	4.02447e-05	0	0	0	8.04894e-05	4.02447e-05	0.000120734	0	0	8.04894e-05	0	0	0	0	0	0	0.000160979	8.04894e-05	8.04894e-05	0.00132807	0.000281713	0.000201223	0.000241468	0.000160979	0.000120734	0.000442692	0.000241468	0.000120734	8.04894e-05	0.000160979	0.000523181	0	0	0	0	0	4.02447e-05	0	0	0
OTU_382	k__Bacteria; p__Bacteroidetes; c__Sphingobacteriia; o__Sphingobacteriales; f__; g__; s__	0	0	0	0	0	4.02447e-05	0	4.02447e-05	4.02447e-05	0	0	0	0	0	0	0	0	0	0	0	0	0	0	0	0	0	0	0	0	0	0	0	0	0.000120734	0	0	0.000281713	8.04894e-05	0.000281713	4.02447e-05	8.04894e-05	4.02447e-05	0.00169028	0.000764649	0.00104636	0.000362202	0.000241468	0.000281713
OTU_444	k__Bacteria; p__Proteobacteria; c__Deltaproteobacteria; o__Spirobacillales; f__; g__; s__	0	4.02447e-05	0	0.000804894	0.000845138	0.00144881	0.000321958	0.000160979	0.000321958	0	0	0	0.000160979	8.04894e-05	0.000321958	8.04894e-05	8.04894e-05	4.02447e-05	0	0	0	0	0	0	0	0	0	0.000160979	0.000241468	4.02447e-05	0.000160979	4.02447e-05	0	0	4.02447e-05	0	0	4.02447e-05	4.02447e-05	0	0	0	0	0	4.02447e-05	0	0	4.02447e-05
OTU_867	k__Bacteria; p__Verrucomicrobia; c__Verrucomicrobiae; o__Verrucomicrobiales; f__Verrucomicrobiaceae; g__Luteolibacter; s__	8.04894e-05	8.04894e-05	0	0.000120734	0.000160979	0	8.04894e-05	4.02447e-05	8.04894e-05	0	0	0	0	0	0	0	4.02447e-05	4.02447e-05	0	0	0	8.04894e-05	4.02447e-05	8.04894e-05	0.00193175	0.000563426	0.000925628	0.000402447	0.000201223	0.000160979	4.02447e-05	0	0	0	4.02447e-05	0	4.02447e-05	0	0	0	0	4.02447e-05	0	0	0	0	0	4.02447e-05
OTU_13568	k__Bacteria; p__Proteobacteria; c__Gammaproteobacteria; o__Pseudomonadales; f__Moraxellaceae; g__Acinetobacter; s__johnsonii	0	0	0	0	0.000120734	4.02447e-05	0	0	0	0	0	0	0	0.00201223	0.000160979	0	0	0	0	0	0.00108661	0	0	0	4.02447e-05	0.000643915	8.04894e-05	0.000442692	0	0	0	4.02447e-05	4.02447e-05	0.000120734	4.02447e-05	0	0	0	0	0	0	4.02447e-05	8.04894e-05	0	0	0	0	0.000160979
OTU_5977	k__Bacteria; p__Proteobacteria; c__Gammaproteobacteria; o__Pseudomonadales; f__Moraxellaceae; g__Acinetobacter; s__	0	0	0	8.04894e-05	0	8.04894e-05	0	0	0	0	0	0	4.02447e-05	0.00237444	0.00060367	0	0	0	8.04894e-05	0	0.000724404	4.02447e-05	0	0	4.02447e-05	4.02447e-05	0	0.000201223	0	4.02447e-05	8.04894e-05	4.02447e-05	0	0	4.02447e-05	4.02447e-05	4.02447e-05	0.000120734	8.04894e-05	8.04894e-05	0	0	8.04894e-05	0	4.02447e-05	4.02447e-05	4.02447e-05	4.02447e-05
OTU_16750	k__Bacteria; p__Proteobacteria; c__Betaproteobacteria; o__Burkholderiales; f__Comamonadaceae; g__Hydrogenophaga; s__	0	8.04894e-05	0	0	0	0	0	8.04894e-05	0	4.02447e-05	0	4.02447e-05	4.02447e-05	0	4.02447e-05	4.02447e-05	0	0	8.04894e-05	4.02447e-05	8.04894e-05	4.02447e-05	0	4.02447e-05	0	0	0	0	4.02447e-05	4.02447e-05	4.02447e-05	8.04894e-05	0.00350129	0	0	8.04894e-05	4.02447e-05	0.000281713	4.02447e-05	8.04894e-05	0.000120734	4.02447e-05	0	0	0	4.02447e-05	4.02447e-05	4.02447e-05
OTU_466	k__Bacteria; p__Actinobacteria; c__Acidimicrobiia; o__Acidimicrobiales; f__C111; g__; s__	8.04894e-05	4.02447e-05	4.02447e-05	8.04894e-05	0.000160979	0	0	8.04894e-05	0.000120734	0	0	0	0.000120734	0	0	0	4.02447e-05	8.04894e-05	0	0	0	4.02447e-05	4.02447e-05	0	0.000402447	0.00156954	0.00104636	0.000120734	0.000160979	0.000201223	0	0	4.02447e-05	0.000160979	4.02447e-05	8.04894e-05	4.02447e-05	8.04894e-05	0	0	0	0	4.02447e-05	0	8.04894e-05	0	0	0
OTU_425	k__Bacteria; p__Planctomycetes; c__Planctomycetia; o__Planctomycetales; f__Planctomycetaceae; g__Planctomyces; s__	4.02447e-05	0	0	4.02447e-05	4.02447e-05	0	0	0	4.02447e-05	0	0	0	0	4.02447e-05	0	8.04894e-05	0	0	0.00148905	0.0018915	0.000362202	0	4.02447e-05	8.04894e-05	0	0	0	4.02447e-05	0	4.02447e-05	0	4.02447e-05	8.04894e-05	0.000442692	0	8.04894e-05	4.02447e-05	0.000201223	0	0	4.02447e-05	0	4.02447e-05	0	0	0	0	0
OTU_966	k__Bacteria; p__Proteobacteria; c__Betaproteobacteria; o__Burkholderiales; f__Comamonadaceae	8.04894e-05	4.02447e-05	0.000120734	0	4.02447e-05	0	4.02447e-05	0	8.04894e-05	4.02447e-05	0.000120734	0	4.02447e-05	8.04894e-05	0	4.02447e-05	0.000120734	8.04894e-05	0.000362202	0.00104636	0.000160979	4.02447e-05	4.02447e-05	4.02447e-05	8.04894e-05	0.000160979	0	0	0.000120734	0	4.02447e-05	0	0.000120734	0	0.000241468	0	8.04894e-05	0	4.02447e-05	0.000160979	0.000160979	0.000160979	8.04894e-05	0	0	8.04894e-05	0.000643915	8.04894e-05
OTU_431	k__Bacteria; p__Cyanobacteria; c__Chloroplast; o__Chlorophyta; f__Chlamydomonadaceae; g__; s__	0	0	0	4.02447e-05	0	0	0	0	0	4.02447e-05	0	0	4.02447e-05	0	8.04894e-05	0	4.02447e-05	4.02447e-05	0	0	0	0	0	0	0	0	0	8.04894e-05	0	4.02447e-05	0	0	0	4.02447e-05	0	4.02447e-05	0.000201223	0.000120734	0.000362202	0.000160979	0.000321958	0.000241468	0.00169028	0.000201223	0.000482936	0.000241468	0.000241468	0.000120734
OTU_6415	k__Bacteria; p__Proteobacteria; c__Gammaproteobacteria; o__Enterobacteriales; f__Enterobacteriaceae; g__Serratia; s__marcescens	0	0	0	0	0	8.04894e-05	0	4.02447e-05	0	4.02447e-05	0	0	0	0	0	0	0	4.02447e-05	0	0	4.02447e-05	0	0	4.02447e-05	0.00060367	4.02447e-05	0.000160979	0	0	4.02447e-05	0	0	0	0	4.02447e-05	0	0	0	0	0	0	8.04894e-05	0	0	4.02447e-05	0	0	0
OTU_437	k__Bacteria; p__Proteobacteria; c__Alphaproteobacteria; o__Sphingomonadales; f__Sphingomonadaceae	0	8.04894e-05	4.02447e-05	0.000442692	0.00128783	0.000362202	8.04894e-05	0.000120734	0.000160979	4.02447e-05	0	0	0	0	4.02447e-05	0.000120734	0.000120734	8.04894e-05	0.000201223	0.000241468	4.02447e-05	0	0	8.04894e-05	0.000201223	0.000160979	0.000321958	8.04894e-05	8.04894e-05	0.000201223	4.02447e-05	0	0	4.02447e-05	0	4.02447e-05	0	4.02447e-05	0	0	4.02447e-05	0	4.02447e-05	0	0	0	0	4.02447e-05
[truncated: 39 more rows]
[truncated: 6 more columns]
