# Supplementary material for: Influence of hydropower stations on the water microbiota in the downstream of Jinsha River, China
Source: PeerJ. 2020 Jul 16;8:e9500. doi: 10.7717/peerj.9500 (PMC7369022; doi:10.7717/peerj.9500)
Supplement: Supplemental Information 3 [file peerj-08-9500-s003.xlsx]

## Sheet: Sheet1
Table S3. Significantly different dOTUs between the different groups.
OTUID	p-values	Effect size	taxonomy	S1-1	S1-2	S1-3	S2-1	S2-2	S2-3	S3-1	S3-2	S3-3	S4-1	S4-2	S4-3	S5-1	S5-2	S5-3	S6-1	S6-2	S6-3	S7-1	S7-2	S7-3	S8-1	S8-2	S8-3	S9-1	S9-2	S9-3	S10-1	S10-2	S10-3	S11-1	S11-2	S11-3	S12-1	S12-2	S12-3	S13-1	S13-2	S13-3	S14-1	S14-2	S14-3	S15-1	S15-2	S15-3	S16-1
OTU_76	9.52225e-34	0.955412	k__Bacteria; p__Nitrospirae; c__Nitrospira; o__Nitrospirales; f__Nitrospiraceae; g__Nitrospira; s__	0.000402447	0.000321958	0.000160979	0.000241468	0.000241468	0.000321958	0.00060367	0.000845138	0.00108661	8.04894e-05	0	0.000160979	0.000281713	0.000160979	0.000362202	0.000321958	0.000362202	0.000885383	8.04894e-05	0.000160979	0.000120734	0.000523181	0.000362202	0.00068416	0.000120734	0.000241468	0.000321958	0.000523181	0.000482936	0.000965873	0.000885383	0.000120734	0.000241468	0.000321958	0.000362202	0.000281713	0.0128783	0.0117112	0.0133612	0.00136832	0.000643915	0.00124759	0.00820992	0.0119527	0.0107051	0.00233419
OTU_316	1.91445e-25	0.904102	k__Bacteria; p__Proteobacteria; c__Gammaproteobacteria; o__HTCC2188; f__HTCC2089; g__; s__	0	4.02447e-05	0.000120734	8.04894e-05	4.02447e-05	0	4.02447e-05	4.02447e-05	0	0	0	0	0	0	0	4.02447e-05	4.02447e-05	0	0	0	0	0	4.02447e-05	0	0	0	0	0	4.02447e-05	4.02447e-05	0	4.02447e-05	4.02447e-05	0	0.000120734	0.000120734	0.00169028	0.00120734	0.00128783	0.000281713	0.000442692	0.000160979	0.000804894	0.00104636	0.00104636	4.02447e-05
OTU_85	2.61768e-25	0.902892	k__Bacteria; p__Planctomycetes; c__Planctomycetia; o__Planctomycetales; f__Planctomycetaceae; g__Planctomyces; s__	0.000925628	0.00100612	0.00100612	0.000201223	0.000321958	0.000201223	0	0.000402447	0.000442692	0	0	4.02447e-05	0.000120734	0.00060367	0.000362202	8.04894e-05	0.000321958	0.000764649	0.000160979	0.000160979	8.04894e-05	4.02447e-05	4.02447e-05	4.02447e-05	0.000241468	0.000201223	0.000120734	0.000201223	0.000804894	0.000764649	0.000402447	0.000160979	0.000241468	0.000402447	0.000201223	0.000201223	0.007566	0.00655988	0.00627817	0.00213297	0.00100612	0.000563426	0.0103831	0.00788796	0.0118319	0.00277688
OTU_148	4.48806e-21	0.856432	k__Bacteria; p__Planctomycetes; c__Planctomycetia; o__Planctomycetales; f__Planctomycetaceae; g__Planctomyces; s__	0.000523181	0.00060367	0.00060367	0.000160979	0.000120734	0.000120734	4.02447e-05	4.02447e-05	0.000160979	0	0	0	8.04894e-05	0.000120734	0	8.04894e-05	8.04894e-05	8.04894e-05	0	0	8.04894e-05	0	4.02447e-05	8.04894e-05	0	4.02447e-05	8.04894e-05	0.000160979	0	0	0.000160979	8.04894e-05	0	8.04894e-05	0.000120734	8.04894e-05	0.00442692	0.00358178	0.00527205	0.00068416	0.000120734	0.000241468	0.00269639	0.00193175	0.00289762	0.00108661
OTU_142	6.32226e-20	0.84035	k__Bacteria; p__Proteobacteria; c__Alphaproteobacteria; o__Rhodospirillales; f__Rhodospirillaceae; g__; s__	0.000563426	0.00108661	0.000563426	0.000241468	0.000281713	0.000362202	0.000160979	0.000241468	0.000563426	0	0	0	0.000281713	0.000482936	0.000321958	0.000160979	0.000442692	0.000643915	4.02447e-05	4.02447e-05	0	0	0	0	4.02447e-05	0.000120734	0.000201223	0.000201223	0.000442692	0.000563426	0.000442692	0.000120734	0.000362202	0.000321958	0.000362202	0.000321958	0.0030586	0.00265615	0.00338055	0.00181101	0.000845138	0.000845138	0.00229395	0.00249517	0.0026159	0.00068416
OTU_121	9.91257e-20	0.837441	k__Bacteria; p__Proteobacteria; c__Alphaproteobacteria; o__Rhodospirillales; f__Rhodospirillaceae; g__; s__	0.00100612	0.000482936	0.000804894	0.000442692	8.04894e-05	0.000321958	0.000724404	0.000804894	0.000442692	0	0	0	0.000281713	0.000201223	0.000442692	0.000120734	0.000724404	0.000402447	4.02447e-05	8.04894e-05	0	0.000201223	8.04894e-05	8.04894e-05	0	0	0	0.000281713	0.000362202	8.04894e-05	0.00060367	0.000160979	0.000402447	0.00068416	0.000241468	0.00060367	0.00651964	0.00579524	0.00490985	0.000965873	0.00136832	0.000563426	0.00317933	0.00245493	0.003783	0.00068416
OTU_14209	3.14736e-18	0.813223	k__Bacteria; p__Chlorobi; c__OPB56; o__; f__; g__; s__	0.00289762	0.00281713	0.00358178	0.000925628	0.000885383	0.0011671	0.00144881	0.00209272	0.00144881	8.04894e-05	0.000201223	0.000362202	0.00120734	0.000804894	0.00100612	0.00165003	0.0018915	0.0018915	0.000241468	0.00293786	0.000482936	0.00136832	0.0015293	0.00169028	0	8.04894e-05	0	0.000764649	0.00068416	0.00104636	0.00128783	0.000965873	0.00060367	0.00511108	0.00309884	0.00639891	0.0129185	0.0103429	0.0112685	0.00631842	0.00462814	0.00591597	0.0154942	0.0102624	0.0156954	0.00374276
OTU_109	6.90376e-18	0.807234	k__Bacteria; p__Bacteroidetes; c__Sphingobacteriia; o__Sphingobacteriales; f__; g__; s__	0.000764649	0.000201223	0.000643915	0.000442692	0.000201223	0.000321958	0.000563426	0.00132807	0.000402447	0	0	4.02447e-05	0.000321958	0.000120734	0.000523181	0.000523181	0.000563426	0.000201223	4.02447e-05	0.000241468	0	0	8.04894e-05	4.02447e-05	0	0	4.02447e-05	0.000281713	8.04894e-05	8.04894e-05	0.000362202	0.000281713	0.000120734	0.000201223	0.000120734	0.000241468	0.00772698	0.00623793	0.00599646	0.000764649	0.00273664	0.00181101	0.00434643	0.00293786	0.00350129	0.000885383
OTU_20	9.67797e-18	0.8046	k__Bacteria; p__Chlorobi; c__OPB56; o__; f__; g__; s__	0.000362202	0.000160979	0.000321958	8.04894e-05	0.000201223	0.000120734	0.000160979	0.000402447	0.000241468	0	0	0	4.02447e-05	8.04894e-05	0.000120734	0.000160979	0.000120734	0.000241468	0	0.000281713	4.02447e-05	8.04894e-05	0.000241468	0.000160979	0	0	4.02447e-05	0.000120734	4.02447e-05	8.04894e-05	8.04894e-05	8.04894e-05	4.02447e-05	0.000442692	8.04894e-05	0.000362202	0.00108661	0.000845138	0.00120734	0.000563426	0.000402447	0.000362202	0.00100612	0.000845138	0.00104636	0.000160979
OTU_20546	3.27137e-17	0.794797	k__Bacteria; p__Chlorobi; c__OPB56; o__; f__; g__; s__	0.00736478	0.00462814	0.00535254	0.00124759	0.00120734	0.00209272	0.00156954	0.00293786	0.00382325	0.000362202	0.000201223	0.000402447	0.00181101	0.00132807	0.00197199	0.00185126	0.00285737	0.00241468	0.000201223	0.00317933	0.000563426	0.0018915	0.00217321	0.00160979	8.04894e-05	4.02447e-05	4.02447e-05	0.00132807	0.000885383	0.00144881	0.00213297	0.00124759	0.00104636	0.00949775	0.00426594	0.00985995	0.0222956	0.0150918	0.0161381	0.0098197	0.00764649	0.00772698	0.0214102	0.0158967	0.0212894	0.00402447
OTU_352	5.11431e-17	0.791077	k__Bacteria; p__Proteobacteria; c__Gammaproteobacteria; o__Chromatiales; f__; g__; s__	0.000160979	0	0	0	8.04894e-05	0	0.000120734	8.04894e-05	0.000120734	0	0	0	4.02447e-05	0	0	4.02447e-05	8.04894e-05	0.000160979	0	0	0	0	0	0	0	0	0	8.04894e-05	4.02447e-05	0	4.02447e-05	4.02447e-05	4.02447e-05	0	4.02447e-05	0	0.00140856	0.00068416	0.00124759	0.000362202	0.000321958	0.000321958	0.000845138	0.000362202	0.00108661	8.04894e-05
OTU_13015	1.38065e-16	0.782566	k__Bacteria; p__Verrucomicrobia; c__Opitutae; o__Opitutales; f__Opitutaceae; g__Opitutus; s__	0.000643915	0.000402447	0.00068416	8.04894e-05	0.000362202	0.000563426	0.000563426	0.000563426	0.00068416	4.02447e-05	4.02447e-05	0	0.00060367	4.02447e-05	0.000442692	0.000321958	0.00100612	0.000845138	8.04894e-05	0.000281713	0.000120734	0.000160979	0.000321958	8.04894e-05	0.000402447	0.00060367	0.000321958	0.000402447	0.000241468	0.000724404	0.000523181	0.000241468	0.000482936	0.00112685	0.000804894	0.000523181	0.00217321	0.00205248	0.00177077	0.000563426	0.000925628	0.000442692	0.00229395	0.0018915	0.00313909	0.000402447
OTU_277	1.68311e-16	0.780827	k__Bacteria; p__Acidobacteria; c__Acidobacteria-6; o__iii1-15; f__; g__; s__	0.000281713	0.000201223	0.000120734	8.04894e-05	0	0.000241468	8.04894e-05	0.000362202	0.000120734	4.02447e-05	0	0	0.000281713	0.000120734	4.02447e-05	0.000281713	0.000281713	0.000281713	0.000120734	0.000160979	0.000120734	4.02447e-05	0.000160979	8.04894e-05	0.000120734	8.04894e-05	0.000201223	0.000321958	0.000201223	0.000241468	0.000402447	0.000362202	0.000321958	0.000321958	0.000321958	0.000281713	0.00120734	0.00128783	0.0011671	4.02447e-05	4.02447e-05	4.02447e-05	0.00068416	0.000804894	0.0015293	0.000523181
OTU_12758	2.83757e-16	0.776175	k__Bacteria; p__Actinobacteria; c__Acidimicrobiia; o__Acidimicrobiales; f__C111; g__; s__	8.04894e-05	0	8.04894e-05	0	0.000160979	0	8.04894e-05	4.02447e-05	4.02447e-05	0	4.02447e-05	4.02447e-05	4.02447e-05	4.02447e-05	8.04894e-05	4.02447e-05	4.02447e-05	0	4.02447e-05	0.000160979	0	0.000120734	0.000201223	0	0	0	0	0	4.02447e-05	0	4.02447e-05	0	4.02447e-05	0.000281713	0.000120734	8.04894e-05	0.00277688	0.00265615	0.00136832	0.000885383	0.00104636	0.00068416	0.00366227	0.00277688	0.00185126	0.000643915
OTU_103	3.70072e-16	0.773771	k__Bacteria; p__Proteobacteria; c__Alphaproteobacteria; o__Rhizobiales; f__Methylocystaceae; g__Methylosinus; s__	0.000965873	0.00100612	0.000643915	0.000120734	0.000523181	0.000201223	8.04894e-05	0.000241468	0.000482936	0	0	8.04894e-05	8.04894e-05	0.000442692	0.000160979	0.000442692	0.000482936	0.00060367	8.04894e-05	0.000281713	0.000160979	0.0011671	0.00060367	0.000402447	0.000120734	0.000201223	0.000120734	0.000201223	0.000120734	0.000201223	8.04894e-05	0.000160979	0.000160979	0.000563426	0.00060367	0.000804894	0.00796845	0.00482936	0.00563426	0.000965873	0.000643915	0.00060367	0.00410496	0.00221346	0.00277688	0.00148905
OTU_288	7.02146e-16	0.767867	k__Bacteria; p__Proteobacteria; c__Alphaproteobacteria; o__Rhodospirillales; f__Acetobacteraceae; g__; s__	0.000321958	8.04894e-05	0.000362202	0.000281713	0.000160979	4.02447e-05	8.04894e-05	0.000281713	0.000321958	0	0	0	0.000201223	0	8.04894e-05	0.000160979	0.000201223	0.000482936	0	0	0	0	0	0	0	0	0	4.02447e-05	0.000160979	0.000160979	0.000160979	0.000362202	0.000201223	0.000201223	4.02447e-05	8.04894e-05	0.00136832	0.000925628	0.00100612	0.000241468	0.000201223	0.000362202	0.000563426	0.00108661	0.000885383	8.04894e-05
OTU_46	1.05761e-15	0.764009	k__Bacteria; p__Chloroflexi; c__SL56; o__; f__; g__; s__	0.00233419	0.00177077	0.00193175	0.00185126	0.00165003	0.00148905	0.00237444	0.00257566	0.00346104	8.04894e-05	0.000120734	4.02447e-05	0.00169028	0.00104636	0.00177077	0.00156954	0.00221346	0.00148905	0.000442692	0.000402447	0.000563426	0.000321958	0.000362202	0.000201223	0.000160979	0.000120734	0.000120734	0.00108661	0.00181101	0.00112685	0.00173052	0.00185126	0.00173052	0.00217321	0.00221346	0.00177077	0.0102222	0.00780747	0.00748551	0.00398422	0.00434643	0.00390373	0.0117112	0.0161784	0.0147698	0.0034208
OTU_387	1.49489e-15	0.7607	k__Bacteria; p__Proteobacteria	0	0	0	4.02447e-05	4.02447e-05	4.02447e-05	4.02447e-05	0.000120734	0	0	0	0	0	4.02447e-05	0	4.02447e-05	4.02447e-05	4.02447e-05	0	0	0	0.000120734	0	0	0	0	0	0	0	0	0	0	0	0	0	0	0.00060367	0.000643915	0.000482936	0.000563426	0.000201223	0.000643915	0.00112685	0.000965873	0.000925628	0
OTU_13095	2.08548e-15	0.757473	k__Bacteria; p__Chloroflexi; c__SL56; o__; f__; g__; s__	0	0.000120734	0.000160979	0.000201223	0.000281713	0.000281713	0.000241468	0.000241468	0.000402447	0	0	0	0.000402447	4.02447e-05	0.000201223	0.000160979	0.000241468	0.000160979	8.04894e-05	0.000120734	0	4.02447e-05	8.04894e-05	4.02447e-05	0	0	0	0.000362202	0.000120734	8.04894e-05	0.000402447	0.000281713	0.000201223	0.000201223	0.000321958	0.000523181	0.000925628	0.000925628	0.00140856	0.000563426	0.000201223	0.000281713	0.00132807	0.00165003	0.0018915	0.000321958
OTU_178	7.56937e-15	0.744555	k__Bacteria; p__Proteobacteria; c__Betaproteobacteria; o__Nitrosomonadales; f__Nitrosomonadaceae; g__; s__	0.00104636	0.000724404	0.000482936	0.000402447	0.000724404	0.000442692	0.000321958	0.000362202	0.000241468	0	0	0	0.000160979	0.000201223	0.000160979	0.000442692	0.000281713	0.000201223	4.02447e-05	0.000241468	0.000120734	8.04894e-05	0.000201223	0.000120734	0	4.02447e-05	4.02447e-05	0.000160979	0.000160979	8.04894e-05	0.000201223	0.000160979	4.02447e-05	0.000362202	0	0.000281713	0.00185126	0.00249517	0.00237444	0.000281713	0.00068416	0.000523181	0.00104636	0.00136832	0.00120734	0.000281713
OTU_296	8.28743e-15	0.743622	k__Bacteria; p__Planctomycetes; c__Phycisphaerae; o__Phycisphaerales; f__; g__; s__	0.000321958	8.04894e-05	0.000201223	0.000201223	0	8.04894e-05	0.000281713	0.000160979	0.000321958	8.04894e-05	0	0	0.000241468	0	4.02447e-05	8.04894e-05	0.000160979	4.02447e-05	0	0	4.02447e-05	0	0	0	0	0	0	0	0	0	4.02447e-05	0	4.02447e-05	8.04894e-05	4.02447e-05	0	0.000764649	0.000281713	0.000925628	8.04894e-05	0.000201223	8.04894e-05	0.00136832	0.00108661	0.00181101	0.000120734
OTU_228	9.19809e-15	0.742543	k__Bacteria; p__Bacteroidetes; c__Sphingobacteriia; o__Sphingobacteriales; f__; g__; s__	4.02447e-05	8.04894e-05	0.000120734	4.02447e-05	0.000120734	0	0.000120734	0	4.02447e-05	0	0	0	8.04894e-05	8.04894e-05	0.000160979	0.000120734	0.000241468	0.000402447	0	0	4.02447e-05	0	4.02447e-05	0	0	0	0	4.02447e-05	4.02447e-05	4.02447e-05	0.000120734	4.02447e-05	0.000160979	0	8.04894e-05	0.000120734	0.00160979	0.00132807	0.00156954	0.00108661	0.00108661	0.00128783	0.0015293	0.00128783	0.00201223	0.000281713
OTU_13227	2.7174e-14	0.731063	k__Bacteria; p__Verrucomicrobia; c__Opitutae; o__Opitutales; f__Opitutaceae; g__Opitutus; s__	0.000281713	0.000241468	0.000482936	8.04894e-05	8.04894e-05	0	0.000362202	0.000201223	0.000321958	0	0	4.02447e-05	0.000120734	0	0.000160979	0.000402447	0.000241468	0.000321958	4.02447e-05	0.000201223	4.02447e-05	8.04894e-05	8.04894e-05	0.000120734	0	8.04894e-05	4.02447e-05	0.000201223	0.000201223	0.000120734	0.000120734	0.000201223	0.000160979	0.000804894	0.000523181	0.000362202	0.00136832	0.00112685	0.00100612	0.000201223	0.000281713	0.000281713	0.00112685	0.00100612	0.0018915	0.000201223
OTU_330	5.34765e-14	0.723627	k__Bacteria; p__Planctomycetes; c__Planctomycetia; o__Pirellulales; f__Pirellulaceae; g__; s__	0.000120734	0	4.02447e-05	0	0	0	0	0	0	0	0	0	0	0	0	4.02447e-05	0	0	4.02447e-05	0.000120734	4.02447e-05	4.02447e-05	4.02447e-05	0	8.04894e-05	0	0	0	4.02447e-05	0.000120734	4.02447e-05	0	0	0	0	4.02447e-05	0.00229395	0.00144881	0.00112685	0.000362202	0.000120734	8.04894e-05	0.00128783	0.000402447	0.000482936	0.000120734
OTU_291	5.9566e-14	0.722423	k__Bacteria; p__Chloroflexi; c__Ellin6529; o__; f__; g__; s__	0.000362202	0.000241468	0.000120734	4.02447e-05	0.000120734	0	0.000120734	4.02447e-05	0.000201223	0	0	0	0.000120734	0.000120734	4.02447e-05	0	4.02447e-05	0.000120734	0	0	0	0	0	8.04894e-05	4.02447e-05	0	0	4.02447e-05	0.000120734	0.000160979	0	0	4.02447e-05	0	0	4.02447e-05	0.0026159	0.00213297	0.00132807	8.04894e-05	8.04894e-05	0.000241468	0.000764649	0.000523181	0.00104636	8.04894e-05
OTU_128	9.05033e-14	0.717705	k__Bacteria; p__Planctomycetes; c__Planctomycetia; o__Gemmatales; f__Gemmataceae; g__; s__	0.00100612	0.00156954	0.000885383	0.000482936	0.000241468	0.000241468	0.000201223	8.04894e-05	0.000523181	4.02447e-05	4.02447e-05	8.04894e-05	0.000241468	0.000563426	0.000281713	0.000402447	0.00060367	0.00132807	0.000120734	0.000241468	0	0.000442692	0.000201223	4.02447e-05	0	0	0	0.000563426	0.000804894	0.00068416	0.000724404	0.000362202	0.000241468	0.00104636	0.000442692	0.00201223	0.00490985	0.003783	0.00374276	0.00229395	0.00112685	0.000764649	0.00309884	0.00209272	0.00249517	0.000925628
OTU_363	1.65519e-13	0.710752	k__Bacteria; p__Proteobacteria; c__Deltaproteobacteria; o__Myxococcales; f__OM27; g__; s__	0.000402447	0.000201223	0.000120734	0.000160979	4.02447e-05	8.04894e-05	8.04894e-05	8.04894e-05	0.000362202	0	0	0	0.000160979	0	8.04894e-05	0	0.000201223	0.000160979	0	0	0	0	0	0	0	0	0	0	8.04894e-05	0	8.04894e-05	4.02447e-05	0	8.04894e-05	4.02447e-05	0	0.0011671	0.000764649	0.000402447	0	0.000120734	8.04894e-05	0.000764649	0.000321958	0.000804894	8.04894e-05
OTU_12757	3.06866e-13	0.703462	k__Bacteria; p__Actinobacteria; c__Acidimicrobiia; o__Acidimicrobiales; f__C111; g__; s__	4.02447e-05	8.04894e-05	0	0	4.02447e-05	4.02447e-05	0	0	0	0	0	0	0	8.04894e-05	0	0	8.04894e-05	4.02447e-05	4.02447e-05	0.000201223	0	0	0	0	0	0	4.02447e-05	0	0	4.02447e-05	0	4.02447e-05	0	0.000120734	8.04894e-05	8.04894e-05	0.00156954	0.00100612	0.00112685	0.000241468	0.000804894	0.000281713	0.00217321	0.00173052	0.00229395	0.00068416
OTU_248	3.67715e-13	0.701291	k__Bacteria; p__Nitrospirae; c__Nitrospira; o__Nitrospirales; f__Nitrospiraceae; g__Nitrospira; s__	0.000281713	0.000362202	0.000442692	0.000281713	0.000120734	0.000281713	0.000160979	0.000281713	0.000281713	0	0	0	0.000120734	8.04894e-05	0.000160979	0.000201223	0.000201223	0.000281713	0	4.02447e-05	0	0	0	0	0	0	4.02447e-05	0.000120734	0.000281713	8.04894e-05	0.000241468	0.000120734	4.02447e-05	0.000160979	8.04894e-05	0.000120734	0.00213297	0.00249517	0.00241468	8.04894e-05	4.02447e-05	4.02447e-05	0.000845138	0.000764649	0.00060367	0.000241468
OTU_313	1.27217e-12	0.685956	k__Bacteria; p__Proteobacteria; c__Gammaproteobacteria; o__Alteromonadales; f__HTCC2188; g__HTCC; s__	0	4.02447e-05	4.02447e-05	0	4.02447e-05	4.02447e-05	0	0.000120734	8.04894e-05	0	0	0	0	0	8.04894e-05	8.04894e-05	0	8.04894e-05	0	0	0	0	0	4.02447e-05	0	0	4.02447e-05	4.02447e-05	0	0	8.04894e-05	0	0	0	0	0	0.000724404	0.000482936	0.000764649	0.000120734	0.000201223	4.02447e-05	0.000523181	0.00104636	0.00148905	0.000241468
OTU_14150	1.58509e-12	0.683157	k__Bacteria; p__Proteobacteria; c__Alphaproteobacteria; o__Rhodobacterales; f__Rhodobacteraceae; g__Rhodobacter; s__	0.00068416	0.000563426	0.000643915	0.000482936	0.000724404	0.000482936	0.00060367	0.000442692	0.000402447	4.02447e-05	0	4.02447e-05	0.000442692	0.000120734	0.000321958	0.000241468	0.000321958	0.000362202	8.04894e-05	0.000160979	8.04894e-05	4.02447e-05	8.04894e-05	4.02447e-05	8.04894e-05	4.02447e-05	4.02447e-05	0.000402447	0.000281713	0.000402447	0.000362202	0.000764649	0.000241468	0.000482936	0.000160979	0.000281713	0.00213297	0.00148905	0.00185126	0.000563426	0.000523181	0.000442692	0.00124759	0.00112685	0.00201223	0.00128783
OTU_137	2.51096e-12	0.677219	k__Bacteria; p__Gemmatimonadetes; c__Gemmatimonadetes; o__KD8-87; f__; g__; s__	0.000523181	0.000201223	0.000482936	0.000160979	0.000281713	0.000281713	0.000402447	0.000523181	0.000643915	0	0	0	0.000321958	0.000201223	0.000321958	0.000281713	0.000523181	0.000563426	4.02447e-05	4.02447e-05	0	4.02447e-05	8.04894e-05	4.02447e-05	0	0	0.000120734	0.000563426	0.000362202	0.000321958	0.000764649	0.000281713	0.000120734	0.000523181	0.000764649	0.000321958	0.00269639	0.00309884	0.0026159	0.00257566	0.00181101	0.0018915	0.00181101	0.00394398	0.00422569	0.00100612
OTU_70	5.20906e-12	0.667568	k__Bacteria; p__Acidobacteria; c__Acidobacteria-6; o__iii1-15; f__mb2424; g__; s__	0.00249517	0.00490985	0.00297811	0.000804894	0.000965873	0.0015293	0.0015293	0.00148905	0.00257566	0	0.000120734	4.02447e-05	0.00165003	0.00128783	0.00140856	0.00177077	0.00177077	0.00213297	0.000160979	0.000160979	8.04894e-05	0.000201223	0.000482936	0.000201223	4.02447e-05	0.000120734	0.000281713	0.0022537	0.00144881	0.00181101	0.00245493	0.0011671	0.00124759	0.0011671	0.00156954	0.00160979	0.00784771	0.00784771	0.00539279	0.00185126	0.00108661	0.00108661	0.00434643	0.00394398	0.00499034	0.000965873
OTU_266	8.00269e-12	0.661754	k__Bacteria; p__Proteobacteria; c__Betaproteobacteria; o__; f__; g__; s__	0.000281713	0.000120734	0.000201223	0.000120734	0.000442692	0.000201223	0.000442692	0.000362202	0.000241468	4.02447e-05	0	0	0.000160979	4.02447e-05	0.000321958	0.000201223	0.000482936	0.000241468	4.02447e-05	4.02447e-05	0	8.04894e-05	8.04894e-05	4.02447e-05	0	0	0	4.02447e-05	8.04894e-05	0.000160979	0.000160979	8.04894e-05	0.000120734	0.000402447	0.000120734	0.000201223	0.000885383	0.000925628	0.000563426	0.000241468	0.000201223	0.000281713	0.000643915	0.000764649	0.00140856	0.000321958
OTU_107	4.36524e-11	0.637752	k__Bacteria; p__Planctomycetes; c__Phycisphaerae; o__Phycisphaerales; f__; g__; s__	0.000120734	0.000160979	0.000281713	0.000362202	0.000201223	0.000482936	0.000442692	0.000523181	0.000724404	4.02447e-05	4.02447e-05	0	0.000160979	0.000120734	0.000402447	0.000120734	0.000362202	0.000321958	0.000120734	0.000160979	4.02447e-05	8.04894e-05	0.000120734	8.04894e-05	8.04894e-05	0	4.02447e-05	0.000281713	0.000321958	0.000120734	0.000643915	0.000281713	0.000321958	0.000402447	8.04894e-05	0.000523181	0.00201223	0.00229395	0.00181101	0.000845138	0.00160979	0.000804894	0.00800869	0.00599646	0.00998068	0.00128783
OTU_12886	7.37657e-11	0.629984	k__Bacteria; p__Proteobacteria; c__Gammaproteobacteria; o__Xanthomonadales; f__Sinobacteraceae; g__; s__	0	8.04894e-05	4.02447e-05	8.04894e-05	0	8.04894e-05	0.000160979	0.000120734	0.000120734	0	4.02447e-05	0	4.02447e-05	0	8.04894e-05	0.000160979	0.000120734	0	4.02447e-05	8.04894e-05	0.000160979	4.02447e-05	0	8.04894e-05	0	4.02447e-05	0	8.04894e-05	8.04894e-05	4.02447e-05	0.000281713	4.02447e-05	0.000120734	0.000281713	0.000201223	0.000241468	0.000845138	0.000764649	0.000643915	0.000643915	0.000402447	0.000885383	0.000724404	0.00100612	0.00140856	0.000281713
OTU_1749	1.6948e-10	0.617319	k__Bacteria; p__Bacteroidetes; c__Flavobacteriia; o__Flavobacteriales; f__Flavobacteriaceae; g__Flavobacterium; s__succinicans	0.000241468	4.02447e-05	0.000160979	4.02447e-05	8.04894e-05	8.04894e-05	0	8.04894e-05	8.04894e-05	0	8.04894e-05	0	0.000160979	0	4.02447e-05	0.000120734	0.000160979	0	0	0	4.02447e-05	0.000201223	0.000362202	0.000201223	8.04894e-05	0	0	8.04894e-05	0	0	0.000160979	0	0	8.04894e-05	8.04894e-05	4.02447e-05	0.00124759	0.000764649	0.000845138	0.000201223	0.000160979	0.000120734	0.00523181	0.0034208	0.00555377	0.000402447
OTU_278	4.186e-10	0.603051	k__Bacteria; p__Planctomycetes; c__Phycisphaerae; o__Phycisphaerales; f__; g__; s__	0.000201223	8.04894e-05	0	0.000160979	0	4.02447e-05	4.02447e-05	0.000281713	0.000120734	8.04894e-05	0.000201223	0.000281713	8.04894e-05	8.04894e-05	8.04894e-05	0	0	4.02447e-05	0	0.000120734	0	0	0	4.02447e-05	0	4.02447e-05	0	4.02447e-05	0	0	0	8.04894e-05	0	8.04894e-05	4.02447e-05	4.02447e-05	0.00060367	0.000402447	0.000482936	0.000321958	0.000523181	0.000160979	0.00233419	0.0011671	0.00209272	0.000281713
OTU_247	4.83128e-10	0.600739	k__Bacteria; p__Proteobacteria; c__Deltaproteobacteria; o__Myxococcales; f__OM27; g__; s__	0.000201223	4.02447e-05	0.000160979	8.04894e-05	0	4.02447e-05	0	0.000160979	0	0	0	4.02447e-05	4.02447e-05	0	4.02447e-05	8.04894e-05	0.000241468	8.04894e-05	0	0	0	4.02447e-05	0	4.02447e-05	0	0	4.02447e-05	4.02447e-05	0	0	0	0	8.04894e-05	8.04894e-05	8.04894e-05	0	0.000643915	0.000643915	0.00068416	4.02447e-05	0.000120734	0.000201223	0.00229395	0.00120734	0.00330006	0.000201223
OTU_354	4.95393e-10	0.600334	k__Bacteria; p__Planctomycetes; c__Phycisphaerae; o__Phycisphaerales; f__; g__; s__	4.02447e-05	4.02447e-05	0	0.000120734	0.000120734	0.000120734	0.000241468	0.000120734	0.000402447	0	0	0	4.02447e-05	8.04894e-05	0.000120734	8.04894e-05	0	8.04894e-05	4.02447e-05	0	0	0	4.02447e-05	0	0	0	4.02447e-05	8.04894e-05	0.000120734	0	0.000241468	0	4.02447e-05	0.000160979	0	8.04894e-05	0.000201223	0.000442692	0.000241468	4.02447e-05	0	0.000160979	0.0011671	0.00100612	0.00132807	4.02447e-05
OTU_58	5.3479e-10	0.599093	k__Bacteria; p__Planctomycetes; c__OM190; o__CL500-15; f__; g__; s__	0.00108661	0.000804894	0.00100612	0.000160979	0.000160979	0.000402447	0.000442692	0.000965873	0.0011671	4.02447e-05	4.02447e-05	0	0.000523181	0.000241468	0.000402447	0.000241468	0.000402447	0.000724404	0	4.02447e-05	0	8.04894e-05	0.000120734	0.000120734	4.02447e-05	0.000120734	0	0.000281713	0.000321958	0.000321958	0.000523181	0.000120734	0.000201223	0.000643915	0.000402447	0.000362202	0.0290164	0.0264005	0.0232614	0.00201223	0.00217321	0.000724404	0.00499034	0.00249517	0.00462814	0.000523181
OTU_322	9.06398e-10	0.59043	k__Bacteria; p__Acidobacteria; c__Solibacteres; o__Solibacterales; f__[Bryobacteraceae]; g__; s__	0.000201223	4.02447e-05	8.04894e-05	0	0.000201223	0.000160979	8.04894e-05	0.000160979	4.02447e-05	0	8.04894e-05	8.04894e-05	0.000241468	4.02447e-05	0.000241468	8.04894e-05	8.04894e-05	8.04894e-05	0	0	4.02447e-05	0.000160979	4.02447e-05	4.02447e-05	4.02447e-05	8.04894e-05	0	0.000160979	0.000120734	0.000201223	0.000281713	0.000160979	0.000120734	0.000442692	4.02447e-05	8.04894e-05	0.00185126	0.00144881	0.00124759	4.02447e-05	8.04894e-05	0	0.000482936	0.000321958	0.000241468	0.000120734
OTU_4051	1.10841e-09	0.587077	k__Bacteria; p__Proteobacteria; c__Gammaproteobacteria; o__Xanthomonadales; f__Sinobacteraceae; g__; s__	0.000402447	0.000402447	0.000442692	0.000201223	0.000120734	4.02447e-05	0.000120734	8.04894e-05	0.000241468	4.02447e-05	4.02447e-05	0	0.000321958	0.000160979	4.02447e-05	0.000160979	0.000241468	0.000201223	0.000160979	0.000120734	4.02447e-05	0	0	4.02447e-05	0	0	0	8.04894e-05	8.04894e-05	0.000241468	0.000362202	0.000281713	0.000321958	0.000241468	0.000563426	0.000362202	0.000804894	0.000925628	0.0011671	0.00112685	0.000442692	0.00108661	0.00112685	0.00112685	0.00169028	0.000321958
OTU_471	1.34181e-09	0.583866	k__Bacteria; p__Actinobacteria; c__Acidimicrobiia; o__Acidimicrobiales; f__; g__; s__	0.000201223	8.04894e-05	0.000120734	8.04894e-05	8.04894e-05	4.02447e-05	0	4.02447e-05	0	0	0	0	4.02447e-05	4.02447e-05	4.02447e-05	0	8.04894e-05	8.04894e-05	0	4.02447e-05	0	4.02447e-05	0	4.02447e-05	0	0	8.04894e-05	8.04894e-05	0.000281713	8.04894e-05	4.02447e-05	4.02447e-05	4.02447e-05	0.000160979	4.02447e-05	0.000241468	0.00100612	0.000482936	0.000764649	8.04894e-05	8.04894e-05	0.000120734	0.000321958	0.000160979	0.000241468	0.000160979
OTU_369	1.57669e-09	0.581135	k__Bacteria; p__Proteobacteria; c__Alphaproteobacteria; o__; f__; g__; s__	0.000321958	8.04894e-05	0.000241468	0.000120734	8.04894e-05	4.02447e-05	4.02447e-05	8.04894e-05	0.000281713	0	0	0	4.02447e-05	4.02447e-05	0.000120734	4.02447e-05	0.000120734	0	0	0	0	0	0	0	0	0	0	4.02447e-05	4.02447e-05	0	4.02447e-05	0	8.04894e-05	0.000201223	0.000160979	0.000160979	0.0011671	0.0015293	0.000965873	0.000201223	0.000160979	0.000201223	0.000482936	0.000120734	0.000281713	4.02447e-05
OTU_243	1.75974e-09	0.579265	k__Bacteria; p__Proteobacteria; c__Alphaproteobacteria; o__Rickettsiales; f__Rickettsiaceae; g__; s__	0.00060367	0.00068416	0.000402447	0.000241468	0.000281713	0.000362202	8.04894e-05	0.000120734	0.000241468	4.02447e-05	0	8.04894e-05	0.000120734	0.000241468	0	0.000120734	0.000201223	0.000241468	0	0	4.02447e-05	0.000201223	8.04894e-05	0.000160979	0	0	0	4.02447e-05	0.000120734	0.000160979	0.000201223	0.000160979	0.000120734	0.000321958	0.000321958	0.000281713	0.000563426	0.000643915	0.000804894	0.000402447	0.000523181	0.000402447	0.00177077	0.000643915	0.00120734	0.000241468
OTU_87	1.84865e-09	0.578423	k__Bacteria; p__Proteobacteria; c__Gammaproteobacteria; o__Xanthomonadales; f__Sinobacteraceae; g__; s__	0.000724404	0.000563426	0.000523181	0.000281713	0.000362202	0.000321958	0.000804894	0.000845138	0.000965873	0	0.000120734	4.02447e-05	0.000442692	0.000120734	0.000362202	0.000402447	0.000321958	0.00068416	0.000160979	0.000241468	0.000160979	0.000362202	0.000120734	4.02447e-05	0	0	8.04894e-05	0.000402447	0.000120734	0.000120734	0.000804894	0.000281713	0.000804894	0.00156954	0.00148905	0.00112685	0.00309884	0.00273664	0.00293786	0.00297811	0.0018915	0.00229395	0.00160979	0.00297811	0.00490985	0.00132807
OTU_115	1.84984e-09	0.578412	k__Bacteria; p__Verrucomicrobia; c__[Pedosphaerae]; o__[Pedosphaerales]; f__R4-41B; g__; s__	0.00140856	0.000442692	0.000885383	0.00100612	0.000563426	0.00217321	0.00128783	0.00132807	0.00193175	0.000241468	0.000241468	0.000281713	0.00068416	0.000402447	0.00108661	0.00104636	0.00173052	0.00132807	4.02447e-05	0.000321958	0.000362202	0.000482936	0.000724404	0.000362202	0.000160979	0	0.000160979	0.00124759	0.000643915	0.00068416	0.000804894	0.000442692	0.000321958	0.000643915	0.000120734	0.000523181	0.00197199	0.00205248	0.0022537	0.000362202	0.000724404	0.00060367	0.00334031	0.00249517	0.00354153	0.000321958
OTU_20572	4.29724e-09	0.563747	k__Bacteria; p__Planctomycetes; c__OM190; o__CL500-15; f__; g__; s__	0	0	4.02447e-05	0	4.02447e-05	8.04894e-05	8.04894e-05	0	0	0	0	0	0	8.04894e-05	0	0	0	0	0	0	0	0	0	0	0	0	0	0	0	0	4.02447e-05	0	0	4.02447e-05	4.02447e-05	0	0.000885383	0.00100612	0.000764649	4.02447e-05	0	0	0.000160979	4.02447e-05	0.000120734	0
OTU_232	6.421e-09	0.556576	k__Bacteria; p__Cyanobacteria; c__Chloroplast; o__Chlorophyta; f__Chlamydomonadaceae; g__; s__	4.02447e-05	8.04894e-05	0	0	0	4.02447e-05	0	0	4.02447e-05	0	0	0	0	4.02447e-05	4.02447e-05	4.02447e-05	4.02447e-05	0	0	0	0	0	0	8.04894e-05	0	0	0	0	0	4.02447e-05	0	0	0	0	0	0	0.00169028	0.00169028	0.00128783	0.00156954	0.0011671	0.000523181	0.00249517	0.000281713	0.000563426	0.000160979
OTU_4456	6.45558e-09	0.556479	k__Bacteria; p__Gemmatimonadetes; c__Gemmatimonadetes; o__Gemmatimonadales; f__Gemmatimonadaceae; g__Gemmatimonas; s__	0.000362202	0.000281713	0.000201223	0.000321958	0.000201223	0.000281713	0.000482936	0.000402447	0.000402447	0	8.04894e-05	0	0.000321958	0	0.000362202	0.000241468	0.000321958	0.000764649	0	4.02447e-05	4.02447e-05	0.000120734	0.000120734	0.000241468	0.000201223	4.02447e-05	8.04894e-05	0.000201223	0.000321958	0.000321958	0.000281713	0.000160979	0.000563426	0.000402447	0.000523181	0.000563426	0.00140856	0.00132807	0.00132807	0.000281713	0.000160979	0.000160979	0.000482936	0.00060367	0.00068416	0.000241468
OTU_355	9.10803e-09	0.550236	k__Bacteria; p__Proteobacteria; c__Deltaproteobacteria; o__Myxococcales; f__Cystobacteraceae; g__; s__	0	0	0	0	0	4.02447e-05	0	0	0.000120734	0	0	0	4.02447e-05	0	0	4.02447e-05	0	0.000120734	4.02447e-05	0	0	0	0	0	0	0	0	4.02447e-05	0	0	0.000160979	0	0.000120734	4.02447e-05	8.04894e-05	4.02447e-05	0.000281713	0.000241468	0.000281713	0.000241468	8.04894e-05	0.000120734	0.00120734	0.000442692	0.00124759	0.000201223
OTU_257	9.59381e-09	0.549286	k__Bacteria; p__Cyanobacteria; c__Chloroplast; o__Chlorophyta; f__; g__; s__	0.000201223	0.000362202	0.000241468	4.02447e-05	0.000120734	4.02447e-05	4.02447e-05	4.02447e-05	0.000442692	0	0	0	8.04894e-05	4.02447e-05	4.02447e-05	8.04894e-05	0.000241468	8.04894e-05	0	0.000120734	0	4.02447e-05	0.000241468	0	8.04894e-05	8.04894e-05	8.04894e-05	0.000120734	8.04894e-05	8.04894e-05	0.000402447	0.000241468	0.000241468	0.000160979	0.000321958	0.000241468	0.00160979	0.00132807	0.00160979	0.000402447	0.000160979	0.000241468	0.000724404	0.000160979	0.000281713	0.000523181
OTU_399	1.19037e-08	0.545318	k__Bacteria; p__Cyanobacteria; c__Chloroplast; o__Chlorophyta; f__; g__; s__	0	0	4.02447e-05	4.02447e-05	0	0	0	0	0	4.02447e-05	0	0	0	4.02447e-05	0	0	0	4.02447e-05	0.000120734	8.04894e-05	4.02447e-05	0	0.000201223	0	0	0	0	0	0	0	8.04894e-05	0	0	0	0	0	0.000362202	0.000201223	0.000643915	0.00060367	0.000442692	0.000321958	0.00128783	0.000362202	0.000804894	0.000160979
OTU_141	1.85797e-08	0.537016	k__Bacteria; p__Bacteroidetes; c__Flavobacteriia; o__Flavobacteriales; f__Flavobacteriaceae; g__Flavobacterium; s__gelidilacus	4.02447e-05	8.04894e-05	0	0.000321958	0.000160979	0.000201223	0.000201223	8.04894e-05	4.02447e-05	4.02447e-05	0	0	4.02447e-05	0.000120734	8.04894e-05	0.000442692	0.000241468	0.000241468	0.000965873	0.00120734	0.00193175	0.00060367	0.000321958	0.00068416	8.04894e-05	4.02447e-05	4.02447e-05	4.02447e-05	8.04894e-05	4.02447e-05	0.000201223	4.02447e-05	4.02447e-05	0.000160979	4.02447e-05	0.000120734	0.000804894	0.00112685	0.00144881	0.000362202	0.00060367	0.000442692	0.00317933	0.00249517	0.00370251	0.00209272
OTU_227	1.89301e-08	0.536664	k__Bacteria; p__Planctomycetes; c__Phycisphaerae; o__Phycisphaerales; f__; g__; s__	0.000120734	4.02447e-05	0.000201223	0.000321958	4.02447e-05	0.000362202	0.000241468	0.000362202	0.000523181	0	0	0	8.04894e-05	4.02447e-05	0.000120734	8.04894e-05	0.000241468	0.000120734	0	8.04894e-05	0	8.04894e-05	0.000482936	0.000201223	0	0	0	0.000442692	0.000120734	0.000120734	0.000281713	0	0	4.02447e-05	0.000160979	0.000160979	0.000482936	0.000402447	0.000643915	4.02447e-05	0.000201223	0.000120734	0.00193175	0.00241468	0.00386349	0.000160979
OTU_146	2.22518e-08	0.533608	k__Bacteria; p__Cyanobacteria; c__Chloroplast; o__Chlorophyta; f__Trebouxiophyceae; g__; s__	0	4.02447e-05	0	4.02447e-05	0	0	4.02447e-05	0	4.02447e-05	0.000201223	0.000120734	0.000281713	4.02447e-05	4.02447e-05	4.02447e-05	8.04894e-05	0	8.04894e-05	0	0	4.02447e-05	8.04894e-05	0.000160979	8.04894e-05	0	0	0	4.02447e-05	0	8.04894e-05	0	0	4.02447e-05	4.02447e-05	8.04894e-05	8.04894e-05	0.00402447	0.00354153	0.0056745	0.00398422	0.00289762	0.00173052	0.00321958	0.000845138	0.00112685	0.000402447
OTU_382	2.92726e-08	0.528378	k__Bacteria; p__Bacteroidetes; c__Sphingobacteriia; o__Sphingobacteriales; f__; g__; s__	0	0	0	0	0	4.02447e-05	0	4.02447e-05	4.02447e-05	0	0	0	0	0	0	0	0	0	0	0	0	0	0	0	0	0	0	0	0	0	0	0	0	0.000120734	0	0	0.000281713	8.04894e-05	0.000281713	4.02447e-05	8.04894e-05	4.02447e-05	0.00169028	0.000764649	0.00104636	0.000362202
OTU_130	3.52803e-08	0.524783	k__Bacteria; p__Gemmatimonadetes; c__Gemmatimonadetes; o__Gemmatimonadales; f__Gemmatimonadaceae; g__Gemmatimonas; s__	0.00112685	0.000160979	0.000482936	0.000241468	0.000120734	0.000120734	0.000804894	0.000885383	0.000523181	0	4.02447e-05	4.02447e-05	0.000523181	0.000362202	0.000523181	0.000523181	0.00060367	0.000885383	0	0.000120734	0.000120734	0.000120734	0.000120734	0.000120734	0.000160979	0.000201223	0.000201223	0.000402447	0.000523181	0.000362202	0.000764649	0.000321958	0.000241468	0.00112685	0.00068416	0.000482936	0.00229395	0.00249517	0.0015293	0.000241468	0.000241468	0.000281713	0.000845138	0.000845138	0.00100612	0.000241468
OTU_17603	4.07167e-08	0.522003	k__Bacteria; p__Cyanobacteria; c__Synechococcophycideae; o__Synechococcales; f__Synechococcaceae; g__Synechococcus; s__	0.00499034	0.00825016	0.00829041	0.00132807	0.00221346	0.00229395	0.0011671	0.00193175	0.00374276	0.00100612	0.000523181	0.00136832	0.00128783	0.00177077	0.00144881	0.0018915	0.00317933	0.00309884	0.000160979	0.000321958	8.04894e-05	0.000482936	0.000241468	4.02447e-05	0.000241468	4.02447e-05	4.02447e-05	0.0011671	0.00185126	0.00128783	0.00108661	0.00068416	0.00136832	0.00185126	0.000402447	0.00193175	0.00917579	0.00804894	0.011349	0.007566	0.00664037	0.00547328	0.0103429	0.00499034	0.00897457	0.00181101
OTU_338	8.24785e-08	0.508067	k__Bacteria; p__Proteobacteria; c__Alphaproteobacteria; o__Rhodospirillales; f__Rhodospirillaceae; g__; s__	8.04894e-05	4.02447e-05	4.02447e-05	4.02447e-05	8.04894e-05	4.02447e-05	0.000120734	4.02447e-05	8.04894e-05	0	0	0	0	0	0.000120734	0	8.04894e-05	0.000281713	0.000120734	0.00068416	0.000160979	0	0	4.02447e-05	0	0	0	8.04894e-05	8.04894e-05	8.04894e-05	0	0	4.02447e-05	0.000563426	0.000442692	0.000563426	0.000925628	0.00104636	0.00100612	0.000402447	0.000160979	0.000241468	0.000321958	0.000482936	0.000321958	8.04894e-05
OTU_213	1.07323e-07	0.502762	k__Bacteria; p__Bacteroidetes; c__Flavobacteriia; o__Flavobacteriales; f__Cryomorphaceae; g__; s__	4.02447e-05	0	0.000120734	4.02447e-05	4.02447e-05	8.04894e-05	4.02447e-05	8.04894e-05	0.000120734	4.02447e-05	0	0	8.04894e-05	4.02447e-05	0.000120734	4.02447e-05	4.02447e-05	0.000160979	0	4.02447e-05	0	0	0	4.02447e-05	0	0	0	4.02447e-05	0.000120734	0.000120734	0.000160979	0	0	0.000241468	8.04894e-05	0.000160979	0.000925628	0.000643915	0.000402447	0.00120734	0.00169028	0.00104636	0.00217321	0.00193175	0.00233419	0.000362202
OTU_581	1.54755e-07	0.495288	k__Bacteria; p__Planctomycetes; c__OM190; o__agg27; f__; g__; s__	0	0	0	0	4.02447e-05	0	0	0	0	0	4.02447e-05	0	0	0	4.02447e-05	0	0	0	0	0	0	0	0	0	0	0	0	0	0	0	4.02447e-05	4.02447e-05	0	4.02447e-05	0	0	0.000120734	8.04894e-05	4.02447e-05	8.04894e-05	0	4.02447e-05	0.000523181	0.000724404	0.00108661	4.02447e-05
OTU_139	1.84114e-07	0.491701	k__Bacteria; p__Proteobacteria; c__Gammaproteobacteria; o__Alteromonadales; f__125ds10; g__; s__	0.000482936	0.000160979	0.000160979	0.000402447	0.000120734	0.000201223	0.000482936	0.000804894	0.000321958	0	0.000120734	0.000241468	0.000201223	4.02447e-05	0.000241468	0.000523181	0.000563426	0.000281713	0	4.02447e-05	4.02447e-05	8.04894e-05	4.02447e-05	0.000120734	0	0	0	8.04894e-05	4.02447e-05	0.000120734	0.000764649	0.000764649	0.000321958	0.000563426	0.000482936	0.000563426	0.0034208	0.00249517	0.00265615	0.000160979	0.000241468	0.000321958	0.000563426	0.000442692	0.000402447	8.04894e-05
OTU_18	2.64263e-07	0.484152	k__Bacteria; p__Cyanobacteria; c__Synechococcophycideae; o__Synechococcales; f__Synechococcaceae; g__Synechococcus; s__	0.011027	0.0130795	0.0132405	0.00422569	0.00442692	0.00450741	0.00269639	0.00297811	0.00869285	4.02447e-05	8.04894e-05	0	0.00173052	0.00543303	0.00362202	0.00430618	0.00651964	0.00635866	0.000402447	0.000281713	0.000120734	8.04894e-05	0.000160979	4.02447e-05	0.000120734	4.02447e-05	8.04894e-05	0.00370251	0.00317933	0.0034208	0.00289762	0.00136832	0.00325982	0.00293786	0.000724404	0.0026159	0.0159369	0.0132405	0.0140052	0.0102624	0.00973921	0.00917579	0.0188748	0.0083709	0.0137234	0.00321958
OTU_13666	4.68349e-07	0.471959	k__Bacteria; p__Cyanobacteria; c__Synechococcophycideae; o__Synechococcales; f__Synechococcaceae; g__Synechococcus; s__	0.000885383	0.00132807	0.00060367	0.000120734	0.000281713	0.000241468	0.000120734	0.000241468	0.000321958	0	4.02447e-05	0	0.000160979	0.000241468	4.02447e-05	0.000201223	0.000281713	0.000241468	0	8.04894e-05	0	4.02447e-05	4.02447e-05	4.02447e-05	0	4.02447e-05	4.02447e-05	8.04894e-05	0.000120734	0.000281713	0	4.02447e-05	4.02447e-05	0.000321958	4.02447e-05	0.000643915	0.0206858	0.0173052	0.0158967	0.0126771	0.00857212	0.00913554	0.00338055	0.00346104	0.00301835	0.000885383
OTU_64	1.07167e-06	0.453787	k__Bacteria; p__Actinobacteria; c__Acidimicrobiia; o__Acidimicrobiales; f__C111; g__; s__	0.000321958	0.000925628	0.0015293	0.000321958	0.000362202	0.000482936	0.000362202	0.000523181	0.00068416	0	4.02447e-05	0.000120734	0.000321958	0.000523181	0.000321958	0.000402447	0.000241468	4.02447e-05	0.000281713	0.000201223	0.000241468	0.000201223	0.000281713	4.02447e-05	4.02447e-05	8.04894e-05	0	0.000362202	0.000201223	0.000402447	0.000442692	0.000321958	8.04894e-05	0.00060367	0.000241468	0.000563426	0.00293786	0.00293786	0.00297811	0.00205248	0.00237444	0.00386349	0.0049501	0.0068416	0.00772698	0.00144881
OTU_124	2.26173e-06	0.436828	k__Bacteria; p__Actinobacteria; c__Thermoleophilia; o__Gaiellales; f__; g__; s__	0.00104636	0.00233419	0.00128783	0.000362202	0.000482936	0.000482936	0.000643915	0.000804894	0.0011671	0	4.02447e-05	0	0.000724404	0.00132807	0.000845138	0.000724404	0.00136832	0.00124759	0.000241468	0.000281713	8.04894e-05	0.000201223	8.04894e-05	0.000321958	0	4.02447e-05	0	0.00108661	0.00185126	0.00100612	0.000925628	0.00068416	0.000885383	0.000643915	0.000965873	0.00160979	0.00382325	0.00334031	0.0026159	0.000563426	0.000321958	0.000160979	0.00128783	0.00128783	0.00148905	0.000321958
OTU_17888	3.91481e-06	0.424018	k__Bacteria; p__Cyanobacteria; c__Synechococcophycideae; o__Synechococcales; f__Synechococcaceae; g__Synechococcus; s__	8.04894e-05	0.00060367	0.000523181	4.02447e-05	8.04894e-05	0	4.02447e-05	0.000241468	0.000120734	4.02447e-05	4.02447e-05	0	8.04894e-05	0.000120734	4.02447e-05	4.02447e-05	0.000241468	0.000160979	0	0	4.02447e-05	4.02447e-05	0	4.02447e-05	0	0	0	0.000120734	0.000120734	4.02447e-05	0.000120734	4.02447e-05	0.000120734	0.000241468	0	0.000321958	0.0105844	0.00925628	0.00969897	0.00849163	0.00539279	0.00664037	0.00173052	0.00193175	0.00169028	0.000563426
OTU_204	4.46175e-06	0.420919	k__Bacteria; p__Bacteroidetes; c__Sphingobacteriia; o__Sphingobacteriales; f__; g__; s__	0.00060367	0.000563426	0.000241468	0.000160979	8.04894e-05	4.02447e-05	0.000120734	0.000281713	0.000201223	4.02447e-05	4.02447e-05	0	8.04894e-05	0	8.04894e-05	0.000160979	0.000281713	0.000523181	0	0.000160979	8.04894e-05	0	4.02447e-05	0	0.000160979	0.000120734	0.000241468	0.000281713	0.000321958	4.02447e-05	0.000362202	0.000160979	0.000160979	0.000362202	0.000160979	0.000241468	0.000241468	0.000523181	0.000442692	0.000764649	0.000482936	0.000845138	0.00156954	0.00124759	0.00193175	0.000402447
OTU_20643	7.48647e-06	0.408482	k__Bacteria; p__Proteobacteria; c__Betaproteobacteria; o__Burkholderiales; f__Oxalobacteraceae; g__Polynucleobacter; s__	0.000523181	0.00124759	0.000764649	0.000563426	0.000482936	0.000724404	0.000482936	0.000241468	0.000442692	0.0118722	0.0127576	0.0107453	0.00060367	0.000925628	0.00060367	0.000241468	0.000523181	0.000281713	0.000402447	0.000241468	0.000241468	0.0100612	0.0102222	0.0122746	0.00160979	0.00253542	0.00156954	0.000241468	0.000563426	0.000563426	0.000724404	0.000804894	0.00108661	0.000523181	0.00068416	0.000764649	0.000201223	4.02447e-05	8.04894e-05	0.000160979	0.000201223	8.04894e-05	8.04894e-05	8.04894e-05	8.04894e-05	0.00120734
OTU_193	7.49381e-06	0.408458	k__Bacteria; p__Cyanobacteria; c__Chloroplast; o__Chlorophyta; f__Chlamydomonadaceae; g__; s__	0.000241468	0.000362202	0.000281713	8.04894e-05	0.000120734	4.02447e-05	0.000120734	8.04894e-05	0.000321958	0	0	4.02447e-05	8.04894e-05	4.02447e-05	0.000120734	0.000362202	0.000321958	0.000160979	0	0	4.02447e-05	8.04894e-05	0	0	0	0	0	0.000160979	0	0.000120734	0.000281713	4.02447e-05	0.000160979	0.000563426	0.000160979	0.000120734	0.000885383	0.00068416	0.00165003	0.00104636	0.000442692	0.000241468	0.00515132	0.000724404	0.000804894	0.000442692
OTU_285	9.46393e-06	0.402756	k__Bacteria; p__Proteobacteria; c__Alphaproteobacteria; o__Rhizobiales; f__Hyphomicrobiaceae; g__Hyphomicrobium; s__	0.00060367	0.000281713	0.000925628	0.000201223	0.000241468	0.000120734	0.000120734	0.000120734	0.000120734	0	0	0	8.04894e-05	0.000281713	0.000482936	8.04894e-05	0.000321958	0.000563426	0	0.000120734	0	0.000120734	8.04894e-05	4.02447e-05	0.000201223	0	0.000201223	0.000201223	0.000201223	0.000201223	0.000160979	8.04894e-05	0.000201223	8.04894e-05	4.02447e-05	0.000201223	0.0011671	0.00112685	0.00108661	0.000201223	0.000120734	0.000160979	0.00060367	8.04894e-05	8.04894e-05	0.000120734
OTU_10312	9.57725e-06	0.402464	k__Bacteria; p__Proteobacteria; c__Gammaproteobacteria; o__Alteromonadales; f__125ds10; g__; s__	0.000281713	0	0.000402447	0.000281713	0.000281713	0.000201223	0.000281713	0.000764649	0.000321958	0.000362202	0.000201223	0.000241468	0.000281713	8.04894e-05	0.000120734	0.000362202	0.00068416	0.000402447	0	0	4.02447e-05	0.000120734	0.000321958	0.000160979	4.02447e-05	0.000160979	0.000201223	0.000160979	0.000120734	0.000201223	0.000965873	0.000845138	0.000523181	0.000523181	0.000885383	0.000362202	0.00237444	0.00201223	0.00217321	0.000241468	0.000241468	0.000362202	0.000241468	0.000402447	0.000321958	0.000120734
OTU_11370	1.01559e-05	0.401021	k__Bacteria; p__Cyanobacteria; c__Synechococcophycideae; o__Synechococcales; f__Synechococcaceae; g__Synechococcus; s__	0.00132807	0.00128783	0.000925628	0.000120734	0.000523181	0.000321958	0.000160979	0.000241468	0.000321958	0.000281713	0.000201223	0.000563426	0.000160979	0.000241468	0.000321958	0.000241468	0.000482936	0.000442692	4.02447e-05	8.04894e-05	0	0.000482936	0.00060367	0	8.04894e-05	0	0	0.000201223	0.000241468	0.000241468	0.000120734	0.000120734	0.000362202	0.00068416	0.000281713	0.000523181	0.00237444	0.00209272	0.00209272	0.00160979	0.00104636	0.00060367	0.00104636	0.000523181	0.000523181	0.000120734
OTU_187	1.11889e-05	0.39863	k__Bacteria; p__Proteobacteria; c__Alphaproteobacteria; o__Sphingomonadales; f__Erythrobacteraceae; g__; s__	0.000643915	0.000482936	0.000965873	0.000241468	0.000402447	0.000482936	0.000241468	0.000281713	0.000523181	0	0	0	4.02447e-05	0.000362202	0.000442692	0.000160979	0.000362202	0.000201223	8.04894e-05	8.04894e-05	0	0.000120734	8.04894e-05	4.02447e-05	0	0.000120734	8.04894e-05	0.000281713	0.000362202	0.000643915	0.000241468	8.04894e-05	0.000201223	0.000201223	0.000120734	8.04894e-05	0.000925628	0.00104636	0.000724404	8.04894e-05	8.04894e-05	0	0.000482936	0.000362202	0.000482936	0.000160979
OTU_15822	1.21109e-05	0.396668	k__Bacteria; p__Actinobacteria; c__Actinobacteria; o__Actinomycetales; f__ACK-M1; g__; s__	0.000523181	0.000724404	0.000523181	0.00068416	0.000362202	0.000362202	0.000885383	0.000804894	0.000241468	0.00165003	0.00245493	0.00132807	0.000402447	4.02447e-05	0.000442692	0.000523181	0.000402447	0.000281713	4.02447e-05	0	0	0.0011671	0.00104636	0.000925628	0.00108661	0.000362202	0.000845138	0.000402447	0.000321958	0.000523181	0.000764649	0.000965873	0.000563426	0.000724404	0.000724404	0.000764649	4.02447e-05	0.000120734	0.000160979	8.04894e-05	8.04894e-05	0.000201223	0.000120734	0.000120734	0.000241468	0.000241468
OTU_13847	1.85641e-05	0.385966	k__Bacteria; p__Proteobacteria; c__Betaproteobacteria; o__Burkholderiales; f__Oxalobacteraceae; g__; s__	0.000241468	0.000201223	0.000281713	0.000563426	0.000362202	0.000643915	0.000643915	0.000362202	0.000362202	0.000120734	0.000241468	0.000120734	0.000362202	0.000160979	0.000321958	0.000442692	0.000885383	0.000482936	0.000201223	0.000241468	0.000201223	0.00068416	0.00104636	0.0015293	0.000281713	0.000482936	0.000523181	0.000482936	0.000362202	0.000281713	0.000845138	0.000402447	0.000885383	0.000845138	0.000643915	0.00060367	0.00197199	0.00140856	0.00128783	0.000925628	0.00173052	0.00128783	0.00165003	0.00241468	0.00269639	0.000563426
OTU_19985	2.66175e-05	0.376779	k__Bacteria; p__Bacteroidetes; c__[Saprospirae]; o__[Saprospirales]; f__Chitinophagaceae; g__Sediminibacterium; s__	0.000643915	0.00060367	0.00060367	0.000160979	0.000402447	0.000643915	0.000885383	0.000482936	0.00060367	0.00100612	0.00108661	0.00132807	0.00068416	0.000281713	0.000362202	0.00068416	0.000321958	0.000804894	0.000201223	0.000201223	0.000321958	0.000764649	0.000563426	0.000241468	8.04894e-05	4.02447e-05	4.02447e-05	0.000160979	0.000201223	0.000321958	0.000241468	0.000442692	0.000442692	0.000321958	0.000482936	0.000402447	0.000201223	8.04894e-05	8.04894e-05	0.000643915	0.000724404	0.00068416	0.000402447	0.000563426	0.000321958	0.000201223
OTU_14	2.9774e-05	0.373892	k__Bacteria; p__Bacteroidetes; c__Cytophagia; o__Cytophagales; f__Cytophagaceae; g__; s__	0.00462814	0.00241468	0.00301835	0.00237444	0.00221346	0.00321958	0.00277688	0.00358178	0.00338055	0.00998068	0.00861236	0.00961848	0.00422569	0.00173052	0.00499034	0.00293786	0.00301835	0.0026159	0.000321958	0.000643915	0.000362202	0.0173455	0.0160174	0.0137234	0.000925628	0.00253542	0.00148905	0.00366227	0.00144881	0.0018915	0.00390373	0.00241468	0.00273664	0.00334031	0.00181101	0.00370251	0.000523181	0.000563426	0.000362202	0.00193175	0.00160979	0.000724404	0.000563426	0.000402447	0.000643915	0.00104636
OTU_8946	3.63196e-05	0.368737	k__Bacteria; p__Actinobacteria; c__Acidimicrobiia; o__Acidimicrobiales; f__C111; g__; s__	8.04894e-05	0.000201223	0.000281713	0.000120734	4.02447e-05	4.02447e-05	0.000120734	8.04894e-05	0.000201223	0	0	0	0	8.04894e-05	0	4.02447e-05	0	0	0	0.000120734	4.02447e-05	0	0	0	0	0	0	8.04894e-05	0.000120734	0	8.04894e-05	8.04894e-05	0.000160979	0.000241468	4.02447e-05	0	0.000885383	0.00060367	0.00112685	0.00060367	0.000845138	0.00185126	0.00148905	0.00148905	0.00197199	0.000402447
OTU_431	3.68791e-05	0.368338	k__Bacteria; p__Cyanobacteria; c__Chloroplast; o__Chlorophyta; f__Chlamydomonadaceae; g__; s__	0	0	0	4.02447e-05	0	0	0	0	0	4.02447e-05	0	0	4.02447e-05	0	8.04894e-05	0	4.02447e-05	4.02447e-05	0	0	0	0	0	0	0	0	0	8.04894e-05	0	4.02447e-05	0	0	0	4.02447e-05	0	4.02447e-05	0.000201223	0.000120734	0.000362202	0.000160979	0.000321958	0.000241468	0.00169028	0.000201223	0.000482936	0.000241468
OTU_114	3.82594e-05	0.367379	k__Bacteria; p__Proteobacteria; c__Betaproteobacteria; o__; f__; g__; s__	0.000321958	0.00060367	0.000402447	0.00112685	0.000523181	0.000965873	0.00060367	0.000563426	0.000724404	8.04894e-05	0.000241468	0.000241468	0.00104636	0.00104636	0.00112685	0.00120734	0.000764649	0.000563426	0.000281713	0.000201223	0.000120734	0.000281713	0.000201223	0.000241468	4.02447e-05	0.000160979	0.000120734	0.000764649	0.000402447	0.00100612	0.00104636	0.00128783	0.000845138	0.00060367	0.00104636	0.000885383	0.00209272	0.00173052	0.00144881	0.00100612	0.000563426	0.00128783	0.00104636	0.0018915	0.00193175	0.00112685
OTU_80	4.18552e-05	0.365028	k__Bacteria; p__Verrucomicrobia; c__Verrucomicrobiae; o__Verrucomicrobiales; f__Verrucomicrobiaceae; g__; s__	0.000764649	0.000885383	0.00124759	0.00217321	0.00406471	0.00358178	0.00068416	0.000643915	0.00241468	0.000643915	0.000402447	0.000885383	0.00144881	0.00229395	0.00185126	0.00120734	0.00237444	0.0026159	0.000160979	0.000160979	8.04894e-05	0.00120734	0.0011671	0.000523181	0.00136832	0.000643915	0.000643915	0.0041452	0.00317933	0.00563426	0.00193175	0.00136832	0.00136832	0.00148905	0.000845138	0.00132807	0.00108661	0.000885383	0.00060367	8.04894e-05	0	0	0.000201223	0.000563426	0.000482936	0
OTU_20066	4.47422e-05	0.363277	k__Bacteria; p__Bacteroidetes; c__Cytophagia; o__Cytophagales; f__Cytophagaceae; g__; s__	0.0018915	0.00136832	0.00185126	0.00160979	0.00128783	0.00136832	0.00241468	0.0022537	0.00181101	0.00402447	0.00462814	0.00466838	0.00205248	0.000442692	0.00209272	0.00169028	0.00185126	0.00160979	0.000201223	0.000321958	0.000402447	0.0083709	0.00869285	0.00784771	0.000442692	0.00156954	0.000643915	0.0015293	0.000482936	0.000845138	0.00249517	0.000804894	0.00120734	0.00181101	0.00112685	0.00301835	0.000281713	0.000120734	0.00060367	0.000523181	0.000643915	0.000321958	0.000241468	0.000201223	0.000241468	0.000724404
OTU_10577	6.59486e-05	0.352983	k__Bacteria; p__Actinobacteria; c__Acidimicrobiia; o__Acidimicrobiales; f__C111; g__; s__	0.00068416	0.00144881	0.0018915	0.00736478	0.00885383	0.00760625	0.00213297	0.0030586	0.00466838	8.04894e-05	4.02447e-05	8.04894e-05	0.00249517	0.00857212	0.00535254	0.00338055	0.00334031	0.00350129	0.000643915	0.0011671	0.000241468	0.000402447	0.00104636	0.000804894	0.000241468	0.000362202	0.000241468	0.00338055	0.00744527	0.0105844	0.00426594	0.00370251	0.00434643	0.0034208	0.00213297	0.00454765	0.000764649	0.000402447	0.000442692	0.000241468	0.000241468	0.000321958	0.000321958	0.000201223	0.000201223	0.000120734
OTU_66	6.65105e-05	0.352756	k__Bacteria; p__Planctomycetes; c__Planctomycetia; o__Gemmatales; f__Gemmataceae; g__; s__	0.00281713	0.00474887	0.00446716	0.00193175	0.00201223	0.00233419	0.00108661	0.00160979	0.00237444	0	0	0	0.00104636	0.00205248	0.00140856	0.00128783	0.00132807	0.0018915	0.000321958	0.000321958	4.02447e-05	0.00233419	0.0022537	0.0018915	0.000120734	4.02447e-05	0	0.00173052	0.000965873	0.000965873	0.00181101	0.000925628	0.00100612	0.00285737	0.000885383	0.00257566	0.00390373	0.00313909	0.00402447	0.000845138	0.00068416	0.000643915	0.00350129	0.0030586	0.00325982	0.00060367
OTU_144	6.92189e-05	0.351686	k__Bacteria; p__Proteobacteria; c__Alphaproteobacteria; o__Rhizobiales; f__Methylocystaceae; g__; s__	0.00140856	0.00160979	0.00144881	0.000724404	0.0011671	0.00100612	0.000523181	0.000563426	0.000965873	0.000201223	8.04894e-05	0.000482936	0.00060367	0.000965873	0.000885383	0.000643915	0.000885383	0.000965873	0.000241468	0.000160979	4.02447e-05	0.000120734	8.04894e-05	8.04894e-05	0.000362202	0.000281713	0.00060367	0.000281713	0.000724404	0.000482936	0.00060367	0.000402447	0.000482936	0.000442692	0.000321958	0.000281713	0.00173052	0.00169028	0.00104636	0.000764649	0.000321958	0.000362202	0.000925628	0.000965873	0.00112685	0.000281713
OTU_11714	7.36957e-05	0.350003	k__Bacteria; p__Firmicutes; c__Bacilli; o__Bacillales; f__[Exiguobacteraceae]; g__Exiguobacterium; s__	8.04894e-05	4.02447e-05	0.000281713	0.000120734	0.000402447	8.04894e-05	8.04894e-05	8.04894e-05	0.000241468	4.02447e-05	0	4.02447e-05	8.04894e-05	0	0.000120734	0.000120734	0.000120734	4.02447e-05	4.02447e-05	4.02447e-05	0	8.04894e-05	0	4.02447e-05	0.000281713	0.000160979	0.00100612	0.00104636	0.00112685	0.00136832	0	0	0	0	4.02447e-05	8.04894e-05	0.000201223	8.04894e-05	8.04894e-05	4.02447e-05	0	0	0	0	4.02447e-05	8.04894e-05
OTU_12575	9.11049e-05	0.344271	k__Bacteria; p__Actinobacteria; c__Actinobacteria; o__Actinomycetales; f__ACK-M1; g__; s__	0.000563426	0.000523181	0.000563426	0.000321958	0.000482936	0.000201223	0.000925628	0.000764649	0.000402447	0.00229395	0.00386349	0.00257566	0.00060367	0.000241468	0.000321958	0.000563426	0.000442692	0.000442692	8.04894e-05	4.02447e-05	0	0.00120734	0.0018915	0.00136832	0.0015293	0.00197199	0.00104636	0.000241468	0.000523181	0.000885383	0.000563426	0.000764649	0.000442692	0.000281713	0.000482936	0.000321958	0.000120734	4.02447e-05	4.02447e-05	8.04894e-05	0	8.04894e-05	0.000120734	4.02447e-05	0.000160979	0.000321958
OTU_67	0.000104154	0.340625	k__Bacteria; p__Proteobacteria; c__Gammaproteobacteria; o__Xanthomonadales; f__Xanthomonadaceae; g__Aquimonas; s__	0.00221346	0.00213297	0.00124759	0.0011671	0.00193175	0.00148905	0.00144881	0.00120734	0.00128783	0.00185126	0.00181101	0.00156954	0.00201223	0.00253542	0.00193175	0.00124759	0.00112685	0.000885383	0.0026159	0.00265615	0.00301835	0.00177077	0.00173052	0.00165003	0.00205248	0.00237444	0.00205248	0.00177077	0.0022537	0.0015293	0.00112685	0.00124759	0.00136832	0.00185126	0.00112685	0.00160979	0.00128783	0.00104636	0.00104636	0.00136832	0.00165003	0.00128783	0.000965873	0.00112685	0.00104636	0.0022537
OTU_11670	0.000117276	0.337373	k__Bacteria; p__Verrucomicrobia; c__Verrucomicrobiae; o__Verrucomicrobiales; f__Verrucomicrobiaceae; g__; s__	0.000120734	0.000120734	0.000120734	0.00068416	0.000925628	0.000965873	8.04894e-05	0.000201223	0.000643915	8.04894e-05	4.02447e-05	8.04894e-05	0.000241468	0.000402447	0.000845138	0.000281713	0.000482936	0.000563426	0.000120734	8.04894e-05	0	0.000281713	0.000241468	0.000362202	0.000120734	0	0	0.00132807	0.00068416	0.00128783	0.00060367	0.000281713	0.000362202	0.000281713	0.000362202	0.000523181	0.000120734	0.000201223	0.000442692	4.02447e-05	0	0	0.000160979	4.02447e-05	0.000281713	0
OTU_18366	0.000118316	0.337131	k__Bacteria; p__Actinobacteria; c__Actinobacteria; o__Actinomycetales; f__ACK-M1; g__; s__	0.000241468	0.000442692	0.000321958	0.000281713	0.000281713	0.000321958	0.000442692	0.00060367	0.000362202	0.00213297	0.00293786	0.00185126	0.000402447	0.000241468	0.000201223	0.000281713	0.000563426	0.000321958	4.02447e-05	8.04894e-05	8.04894e-05	0.000120734	0.000281713	0.000120734	0.000160979	0.000160979	4.02447e-05	0.000201223	0.000120734	0.000201223	0.000724404	0.000563426	0.000160979	0.000241468	0.000442692	0.000362202	0.000362202	0.000482936	0.000321958	0.000482936	0.000362202	0.000804894	0.000362202	0.000442692	0.000965873	0.000281713
OTU_143	0.000132009	0.334113	k__Bacteria; p__Actinobacteria; c__Acidimicrobiia; o__Acidimicrobiales; f__C111; g__; s__	0.000442692	0.000804894	0.0015293	0.00108661	0.00148905	0.00112685	0.000643915	0.000925628	0.00124759	0	4.02447e-05	0	0.000482936	0.00193175	0.00136832	0.00108661	0.00104636	0.000925628	0.000281713	0.000523181	0.000482936	0.000120734	0.000160979	0.000120734	0	8.04894e-05	8.04894e-05	0.000804894	0.00144881	0.00205248	0.00108661	0.00060367	0.00136832	0.000804894	0.000482936	0.00120734	8.04894e-05	0.000442692	0.000120734	0	0	0	0	0.000281713	0.000160979	0
OTU_19687	0.000139785	0.33253	k__Bacteria; p__Bacteroidetes; c__[Saprospirae]; o__[Saprospirales]; f__Chitinophagaceae; g__Sediminibacterium; s__	0.0018915	0.00173052	0.0015293	0.00148905	0.00128783	0.00148905	0.00144881	0.0015293	0.00185126	0.00599646	0.00595621	0.00680135	0.00108661	0.000724404	0.00173052	0.00221346	0.00245493	0.00281713	8.04894e-05	0.000321958	0.000362202	0.00265615	0.00253542	0.00253542	0.00060367	0.000724404	0.000402447	0.00140856	0.000965873	0.00136832	0.00173052	0.00177077	0.00181101	0.00181101	0.00148905	0.00160979	0.000442692	0.000362202	0.000362202	0.00112685	0.0011671	0.00068416	0.00124759	0.00120734	0.00124759	0.000442692
OTU_20374	0.000145475	0.331424	k__Bacteria; p__Bacteroidetes; c__Cytophagia; o__Cytophagales; f__Cytophagaceae; g__; s__	0.000241468	0.000160979	0.000321958	0.000201223	0.000281713	0.000160979	0.000281713	0.000160979	0.000241468	0.00068416	0.00160979	0.000925628	0.000201223	0.000160979	0.000321958	0.000160979	0.000120734	0.000241468	4.02447e-05	0.000160979	4.02447e-05	0.0015293	0.0018915	0.00173052	0.000120734	0	0.000120734	0	8.04894e-05	8.04894e-05	0.000201223	8.04894e-05	4.02447e-05	0.000160979	0.000201223	0.000362202	0.000120734	4.02447e-05	4.02447e-05	0.000281713	0.000160979	0.000160979	4.02447e-05	8.04894e-05	0	0.000201223
OTU_20186	0.000184332	0.32482	k__Bacteria; p__Actinobacteria; c__Actinobacteria; o__Actinomycetales; f__ACK-M1; g__; s__	0.00913554	0.00893432	0.00885383	0.0137637	0.00949775	0.0109063	0.0220943	0.0214907	0.0104234	0.0515132	0.0850773	0.0556182	0.0143271	0.00410496	0.00990019	0.0177479	0.011188	0.0101417	0.0011671	0.00354153	0.00293786	0.00374276	0.00301835	0.00362202	0.00273664	0.00301835	0.00370251	0.00825016	0.00772698	0.0103831	0.0198809	0.0236639	0.0165406	0.0148905	0.0207663	0.0183918	0.0121539	0.0094575	0.00820992	0.0175869	0.0132807	0.0206858	0.0106648	0.0297006	0.0251127	0.00825016
OTU_131	0.000189321	0.324071	k__Bacteria; p__Bacteroidetes; c__Flavobacteriia; o__Flavobacteriales; f__Cryomorphaceae; g__; s__	0.000643915	8.04894e-05	0.000160979	0.000120734	8.04894e-05	8.04894e-05	0.000201223	0.000201223	4.02447e-05	0.00100612	0.000804894	0.00132807	0.000120734	4.02447e-05	0	0.000201223	8.04894e-05	0.000201223	4.02447e-05	4.02447e-05	0	4.02447e-05	8.04894e-05	4.02447e-05	4.02447e-05	0	4.02447e-05	4.02447e-05	4.02447e-05	0	0.000160979	0.000201223	0.000160979	0.000160979	0.000201223	0.000120734	0.000402447	0.000523181	0.000804894	0.00185126	0.0030586	0.00181101	0.00249517	0.00229395	0.00301835	0.00173052
OTU_302	0.000223187	0.319431	k__Bacteria; p__Proteobacteria; c__Alphaproteobacteria; o__Rickettsiales; f__; g__; s__	0.000281713	8.04894e-05	8.04894e-05	8.04894e-05	4.02447e-05	0.000160979	0.000442692	0.000281713	0.000201223	0	0	0	0.000120734	4.02447e-05	0.000160979	0.000120734	0.000160979	0.000120734	0	0	0	0.000482936	0.000201223	0.000241468	0	0	0	0.000120734	4.02447e-05	0.000160979	0.000241468	4.02447e-05	8.04894e-05	0.000120734	8.04894e-05	0.000281713	0.000241468	0.000160979	0.000362202	0.00068416	0.000845138	0.000523181	0.00108661	0.000724404	0.00068416	0.000201223
OTU_13405	0.0002528	0.315896	k__Bacteria; p__Actinobacteria; c__Actinobacteria; o__Actinomycetales; f__ACK-M1; g__; s__	0.00112685	0.00197199	0.00169028	0.0026159	0.0015293	0.00165003	0.00354153	0.00350129	0.00201223	0.00430618	0.00660013	0.00402447	0.00297811	0.00060367	0.00181101	0.00285737	0.00193175	0.00177077	0.000241468	0.000321958	0.000281713	0.000362202	0.000201223	0.000160979	0.000281713	0.000120734	0.000201223	0.00165003	0.00124759	0.00120734	0.00293786	0.00265615	0.00201223	0.00185126	0.00233419	0.00197199	0.00169028	0.00108661	0.00108661	0.00181101	0.00185126	0.00338055	0.00132807	0.00354153	0.00281713	0.00100612
OTU_37	0.000259126	0.315192	k__Bacteria; p__Bacteroidetes; c__[Saprospirae]; o__[Saprospirales]; f__Chitinophagaceae; g__; s__	0.00362202	0.00277688	0.00233419	0.000885383	0.00120734	0.00144881	0.00193175	0.00128783	0.00181101	4.02447e-05	0.000160979	4.02447e-05	0.00181101	0.00124759	0.00265615	0.00229395	0.00289762	0.00237444	0.000120734	0.000643915	0.000201223	0.000321958	0.000281713	0.000321958	0.000120734	0	8.04894e-05	0.00108661	0.00124759	0.000885383	0.00124759	0.00132807	0.00120734	0.00350129	0.00257566	0.0022537	0.00418545	0.00265615	0.00366227	0.00820992	0.00740502	0.00619768	0.00752576	0.00712331	0.00865261	0.00313909
OTU_32	0.000271044	0.313909	k__Bacteria; p__Proteobacteria; c__Betaproteobacteria; o__Burkholderiales; f__Oxalobacteraceae; g__Polynucleobacter; s__cosmopolitanus	0.00132807	0.000764649	0.00108661	0.00108661	0.00112685	0.0011671	0.00100612	0.00104636	0.0011671	0.0261993	0.0303042	0.0278493	0.00233419	0.00173052	0.00213297	0.0011671	0.000442692	0.000724404	0.000482936	0.000885383	0.000643915	0.00523181	0.00611719	0.00788796	0.00217321	0.00330006	0.00241468	0.000965873	0.00120734	0.00104636	0.00169028	0.00160979	0.0011671	0.00160979	0.00120734	0.0011671	0.000281713	0.000321958	0.000402447	0.000925628	0.000804894	0.00068416	0.000321958	0.000120734	0.00060367	0.000965873
OTU_10694	0.000282059	0.312771	k__Bacteria; p__Actinobacteria; c__Actinobacteria; o__Actinomycetales; f__ACK-M1; g__; s__	0.000402447	0.000563426	0.000160979	0.000402447	0.000321958	0.000201223	0.00060367	0.000885383	0.000241468	0.00201223	0.00321958	0.00221346	0.000201223	0.000201223	0.000362202	0.000442692	0.00060367	0.000241468	4.02447e-05	8.04894e-05	0.000120734	0.000442692	0.000160979	8.04894e-05	0.000201223	0.000402447	0.000201223	0.000120734	0.000281713	0.000482936	0.000402447	0.00104636	0.000442692	0.000442692	0.000482936	0.00060367	0.000281713	0.000523181	0.000160979	0.000442692	0.000160979	0.000321958	0.000201223	0.00060367	0.000402447	0.000241468
OTU_44	0.00029176	0.311802	k__Bacteria; p__Proteobacteria; c__Alphaproteobacteria; o__Rickettsiales; f__Pelagibacteraceae; g__; s__	0.00277688	0.00330006	0.00281713	0.00277688	0.00217321	0.00334031	0.0041452	0.00374276	0.00478912	8.04894e-05	4.02447e-05	8.04894e-05	0.00297811	0.00160979	0.00313909	0.00382325	0.00185126	0.00160979	0.000845138	0.00334031	0.00128783	0.00169028	0.00177077	0.00124759	4.02447e-05	0.000120734	8.04894e-05	0.00221346	0.00112685	0.00124759	0.00289762	0.00217321	0.00112685	0.00301835	0.00197199	0.00434643	0.00426594	0.00330006	0.00547328	0.0041452	0.00330006	0.00615744	0.00370251	0.0123149	0.00664037	0.00100612
OTU_19655	0.000293548	0.311627	k__Bacteria; p__Bacteroidetes; c__Cytophagia; o__Cytophagales; f__Cytophagaceae; g__; s__	0.000120734	0.000241468	0.000402447	0.000241468	0.000120734	0.000201223	0.000201223	0.000201223	0.000241468	0.000482936	0.000160979	0.00060367	0.000643915	8.04894e-05	0.000281713	0.000321958	0.000201223	0.000201223	0	4.02447e-05	4.02447e-05	0.00132807	0.00136832	0.00068416	8.04894e-05	0.000160979	4.02447e-05	0.000241468	0.000120734	0.000160979	0.000362202	8.04894e-05	0.000241468	0.000120734	0.000160979	0.000362202	0	4.02447e-05	0	8.04894e-05	0	4.02447e-05	4.02447e-05	0	4.02447e-05	0.000160979
OTU_7933	0.000314315	0.309665	k__Bacteria; p__Bacteroidetes; c__[Saprospirae]; o__[Saprospirales]; f__Chitinophagaceae; g__; s__	0.000482936	0.00060367	0.000482936	0.000201223	0.000402447	0.000160979	0.000362202	0.000281713	0.000281713	4.02447e-05	4.02447e-05	0	0.000321958	0.000160979	0.000281713	0.000321958	8.04894e-05	0.000362202	0	4.02447e-05	4.02447e-05	0	4.02447e-05	4.02447e-05	0	4.02447e-05	0	0.000120734	0.000201223	0.000241468	0.000442692	0.000402447	0.000201223	0.000160979	0.000281713	0.000482936	0.00160979	0.00100612	0.0011671	0.00205248	0.00173052	0.00277688	0.00112685	0.00205248	0.00120734	0.000764649
OTU_312	0.000335748	0.307765	k__Bacteria; p__Proteobacteria; c__Betaproteobacteria; o__Neisseriales; f__Neisseriaceae	0.000281713	0.000724404	0.000362202	0.000281713	0.000442692	0.000482936	0.000160979	0.000321958	0.000362202	0	0	0	4.02447e-05	4.02447e-05	4.02447e-05	0.000120734	4.02447e-05	0.000160979	8.04894e-05	8.04894e-05	4.02447e-05	0	0	0	0	0	0	8.04894e-05	0	0.000120734	0.000120734	0	0	0.000120734	0	0	4.02447e-05	0.000160979	4.02447e-05	8.04894e-05	8.04894e-05	0	0.000925628	0.00068416	0.00112685	0.000241468
OTU_3844	0.00034657	0.30685	k__Bacteria; p__Bacteroidetes; c__[Saprospirae]; o__[Saprospirales]; f__Chitinophagaceae; g__Sediminibacterium; s__	0.000201223	0.000523181	0.000201223	0.000402447	4.02447e-05	0.000321958	0.000321958	0.000281713	0.000120734	0.000804894	0.00144881	0.000965873	8.04894e-05	4.02447e-05	8.04894e-05	0.000201223	4.02447e-05	0.000241468	4.02447e-05	8.04894e-05	0.000120734	0.000362202	0.000160979	0.000482936	0.000241468	0	0.000241468	0.000201223	4.02447e-05	8.04894e-05	4.02447e-05	4.02447e-05	0.000160979	0.000201223	0.000160979	0.000160979	0	0	0.000120734	8.04894e-05	0	8.04894e-05	4.02447e-05	0	0	0
OTU_71	0.000349216	0.30663	k__Bacteria; p__Actinobacteria; c__Acidimicrobiia; o__Acidimicrobiales; f__C111; g__; s__	0.00160979	0.0015293	0.00233419	0.00301835	0.00587572	0.00285737	0.00132807	0.00177077	0.00338055	0	0.000120734	0.000160979	0.00173052	0.00446716	0.00334031	0.00160979	0.00354153	0.00321958	0.000845138	0.00213297	0.000362202	0.00177077	0.00209272	0.000764649	0.000241468	0.000523181	0.000160979	0.00205248	0.00330006	0.00511108	0.00185126	0.00128783	0.00293786	0.00321958	0.000965873	0.00317933	0.00060367	0.000563426	0.000563426	0.000201223	4.02447e-05	8.04894e-05	0.000402447	0.000281713	0.000241468	0.000160979
OTU_136	0.000399359	0.302741	k__Bacteria; p__Bacteroidetes; c__Sphingobacteriia; o__Sphingobacteriales; f__; g__; s__	0.000764649	4.02447e-05	0.000442692	0.000643915	0.000321958	0.000724404	0.000643915	0.000764649	0.000845138	0.0041452	0.00402447	0.00350129	0.000643915	0.000160979	0.000523181	0.000281713	0.000402447	0.000281713	0	4.02447e-05	0	0.00132807	0.00177077	0.00124759	4.02447e-05	0	0	0.000241468	0.000160979	0.000120734	0.000321958	0.000120734	4.02447e-05	4.02447e-05	8.04894e-05	0.000160979	0	0	0	0	4.02447e-05	8.04894e-05	4.02447e-05	0	0	0
OTU_10	0.000406117	0.302253	k__Bacteria; p__Proteobacteria; c__Alphaproteobacteria; o__Sphingomonadales; f__; g__; s__	0.00833065	0.0079282	0.00736478	0.0098197	0.0163796	0.0114295	0.00579524	0.00623793	0.0140454	0.00358178	0.00233419	0.00317933	0.00841114	0.0100209	0.00953799	0.00953799	0.0115905	0.00961848	0.0196797	0.0245493	0.0167418	0.00825016	0.00905505	0.00857212	0.0127576	0.0130393	0.0112685	0.0104636	0.0126368	0.013321	0.00841114	0.0162589	0.0163393	0.00647939	0.0094575	0.00639891	0.00297811	0.00309884	0.00285737	0.00458789	0.00382325	0.00370251	0.00136832	0.00160979	0.00148905	0.00257566
OTU_17892	0.000443471	0.299687	k__Bacteria; p__Proteobacteria; c__Betaproteobacteria; o__Methylophilales; f__Methylophilaceae; g__; s__	0	8.04894e-05	8.04894e-05	8.04894e-05	8.04894e-05	4.02447e-05	4.02447e-05	0.000120734	0.000120734	0.00253542	0.00273664	0.00350129	0.000201223	0.000281713	4.02447e-05	8.04894e-05	8.04894e-05	4.02447e-05	0.000120734	0	4.02447e-05	0.000402447	0.00112685	0.00128783	0.000120734	8.04894e-05	0.000281713	0.000281713	8.04894e-05	0	0	0.000160979	8.04894e-05	0	0	4.02447e-05	0	4.02447e-05	0	8.04894e-05	4.02447e-05	8.04894e-05	8.04894e-05	0	4.02447e-05	0.000120734
OTU_28	0.0004567	0.298827	k__Bacteria; p__Proteobacteria; c__Gammaproteobacteria; o__Xanthomonadales; f__Xanthomonadaceae; g__; s__	0.00599646	0.00949775	0.00591597	0.00289762	0.00579524	0.00386349	0.00394398	0.0049501	0.00776722	0.000402447	0.000281713	0.000281713	0.00394398	0.00245493	0.00394398	0.00358178	0.00579524	0.00700258	0.0153735	0.0198004	0.0129588	0.00301835	0.00265615	0.00390373	0.0101417	0.0134417	0.00925628	0.00418545	0.0138442	0.00901481	0.00293786	0.0034208	0.00237444	0.00442692	0.0133612	0.00229395	0.00297811	0.00285737	0.00418545	0.00354153	0.00338055	0.00317933	0.00317933	0.00217321	0.00241468	0.00334031
OTU_23	0.000523022	0.294846	k__Bacteria; p__Actinobacteria; c__Acidimicrobiia; o__Acidimicrobiales; f__C111; g__; s__	0.00148905	0.00285737	0.00394398	0.00941726	0.0103026	0.00748551	0.00370251	0.00466838	0.00744527	0.000241468	0.000321958	0.000321958	0.003783	0.0121137	0.00716355	0.00619768	0.00619768	0.00422569	0.00197199	0.00366227	0.00112685	0.00120734	0.0015293	0.000563426	0.000925628	0.00108661	0.00060367	0.00446716	0.00941726	0.0126368	0.00643915	0.00410496	0.00672086	0.00704282	0.00374276	0.00990019	0.00277688	0.0022537	0.00229395	0.00193175	0.00128783	0.00209272	0.00330006	0.00543303	0.0022537	0.00124759
OTU_13121	0.000537809	0.294025	k__Bacteria; p__Actinobacteria; c__Acidimicrobiia; o__Acidimicrobiales; f__C111; g__; s__	0.000885383	0.00169028	0.00253542	0.00575499	0.00768674	0.00559401	0.00241468	0.00257566	0.00370251	0.000120734	0.000321958	0.000281713	0.00289762	0.0072038	0.0041452	0.00458789	0.00346104	0.00301835	0.00144881	0.00257566	0.00060367	0.00060367	0.00165003	0.000442692	0.000442692	0.000402447	0.000241468	0.00330006	0.00704282	0.00861236	0.00499034	0.00285737	0.00470863	0.0049501	0.00277688	0.00595621	0.0018915	0.00120734	0.00132807	0.000804894	0.000925628	0.00185126	0.0026159	0.00350129	0.00173052	0.00144881
OTU_170	0.000552048	0.293253	k__Bacteria; p__Planctomycetes; c__Planctomycetia; o__Pirellulales; f__Pirellulaceae; g__; s__	0.000442692	0.000362202	0.000241468	0.00173052	0.00201223	0.00165003	0.000523181	0.000724404	0.00120734	4.02447e-05	4.02447e-05	0	0.000845138	0.0015293	0.00136832	0.00100612	0.0018915	0.00273664	0.000160979	0.000241468	4.02447e-05	4.02447e-05	0	0	0.000160979	8.04894e-05	0.000120734	0.00144881	0.0011671	0.00144881	0.000643915	0.000321958	0.000442692	0.000281713	0.000120734	0.000160979	0.000281713	4.02447e-05	0.000201223	0	0	4.02447e-05	0	8.04894e-05	0	8.04894e-05
OTU_20382	0.000591108	0.291232	k__Bacteria; p__Bacteroidetes; c__[Saprospirae]; o__[Saprospirales]; f__Chitinophagaceae; g__Sediminibacterium; s__	0.000281713	0.000281713	0.000563426	8.04894e-05	0.000201223	8.04894e-05	8.04894e-05	0.000321958	0	0.000965873	0.00112685	0.0011671	4.02447e-05	4.02447e-05	4.02447e-05	0.000321958	0.000201223	0.000160979	0	8.04894e-05	0	0.000321958	0.000281713	0.000442692	0.000160979	4.02447e-05	8.04894e-05	0	0.000120734	0.000241468	8.04894e-05	8.04894e-05	4.02447e-05	8.04894e-05	8.04894e-05	0.000160979	4.02447e-05	0	4.02447e-05	0	4.02447e-05	8.04894e-05	0	0	8.04894e-05	0
OTU_249	0.000592251	0.291174	k__Bacteria; p__Proteobacteria; c__Gammaproteobacteria; o__Pseudomonadales; f__Pseudomonadaceae; g__; s__	0.000281713	0.000402447	4.02447e-05	0.000402447	0.000724404	8.04894e-05	0.000120734	8.04894e-05	0.000241468	0	4.02447e-05	0	0.000160979	0.000764649	0.000724404	0.000120734	0.00060367	0.000321958	0.000120734	0.000160979	0.000281713	4.02447e-05	4.02447e-05	0.000120734	8.04894e-05	0.000201223	0.000201223	0.00148905	0.000321958	0.000482936	0.000160979	0.000321958	8.04894e-05	8.04894e-05	0.000201223	0.000160979	0.000160979	8.04894e-05	0.000201223	0	4.02447e-05	4.02447e-05	4.02447e-05	0.000120734	8.04894e-05	0.000120734
OTU_1428	0.000642153	0.288773	k__Bacteria; p__Proteobacteria; c__Gammaproteobacteria; o__Xanthomonadales; f__Xanthomonadaceae; g__Lysobacter; s__brunescens	0.000281713	0.000201223	0.000241468	0.000321958	0.000523181	4.02447e-05	0.000281713	0.000160979	0.000402447	8.04894e-05	4.02447e-05	8.04894e-05	0.000321958	0.000482936	0.000160979	0.000281713	0.000402447	0.000402447	0.00197199	0.00124759	0.000885383	0.000160979	0.000281713	8.04894e-05	0.00104636	0.00136832	0.000764649	0.000523181	0.000764649	0.000965873	0.000201223	0.000241468	0	0.000442692	0.0015293	0.000281713	0.000201223	8.04894e-05	0.000482936	0	8.04894e-05	0.000120734	0.000160979	0.000120734	0	8.04894e-05
OTU_11146	0.000728131	0.285024	k__Bacteria; p__Proteobacteria; c__Gammaproteobacteria; o__Pseudomonadales; f__Moraxellaceae; g__Acinetobacter; s__	0	0.000201223	0	0.000201223	0.000965873	0.000845138	4.02447e-05	0	8.04894e-05	0	0	4.02447e-05	0.000160979	0.0022537	0.000965873	4.02447e-05	8.04894e-05	8.04894e-05	0.000160979	4.02447e-05	0.000925628	0	4.02447e-05	0	0.000201223	4.02447e-05	0.000120734	0.000643915	8.04894e-05	4.02447e-05	0	4.02447e-05	4.02447e-05	0	4.02447e-05	0	0	4.02447e-05	0	0	4.02447e-05	4.02447e-05	4.02447e-05	0	0	0
OTU_51	0.00082168	0.281397	k__Bacteria; p__Proteobacteria; c__Betaproteobacteria; o__Methylophilales; f__Methylophilaceae; g__; s__	0.000120734	0.000281713	8.04894e-05	0.000160979	8.04894e-05	0.000120734	0.000402447	0.000120734	0.000160979	0.00482936	0.0041452	0.00478912	8.04894e-05	8.04894e-05	0.000201223	4.02447e-05	0.000201223	0.000120734	0	0	0.000120734	0.00120734	0.00124759	0.00112685	0.000201223	0.000281713	4.02447e-05	0	0.000281713	4.02447e-05	0.000160979	0.000120734	0.000160979	0.000160979	0.000120734	8.04894e-05	0.000201223	8.04894e-05	8.04894e-05	4.02447e-05	0.000160979	4.02447e-05	4.02447e-05	4.02447e-05	8.04894e-05	8.04894e-05
OTU_1891	0.000955389	0.276843	k__Bacteria; p__Proteobacteria; c__Betaproteobacteria; o__Burkholderiales; f__Oxalobacteraceae; g__; s__	0.000120734	0.000201223	0.000120734	0.000201223	0	0.000160979	0.000241468	4.02447e-05	0.000201223	0.000281713	0.000281713	0.000281713	0.000120734	0.000362202	0.000241468	0.000201223	0.000160979	0.000281713	4.02447e-05	0.000201223	0.000120734	0.000321958	0.000201223	0.000281713	0.000402447	0.000482936	0.000402447	0.000241468	0.000201223	8.04894e-05	0.000160979	0.000241468	0.000201223	0.000201223	8.04894e-05	0.000160979	0.000482936	0.000563426	0.00060367	0.00060367	0.00068416	0.000482936	0.000523181	0.000845138	0.000764649	0.000523181
OTU_117	0.00104138	0.274225	k__Bacteria; p__Verrucomicrobia; c__Opitutae; o__Opitutales; f__Opitutaceae; g__; s__	0.00108661	0.000442692	0.00100612	0.000764649	0.00060367	0.000965873	0.00144881	0.00112685	0.00124759	4.02447e-05	0	4.02447e-05	0.00124759	0.000241468	0.000885383	0.00132807	0.000965873	0.00100612	4.02447e-05	8.04894e-05	0	0.000160979	0.000160979	0.000241468	0.000120734	8.04894e-05	8.04894e-05	0.000845138	0.000885383	0.000482936	0.000925628	0.00060367	0.000563426	0.000804894	0.000241468	0.000442692	0.00100612	0.000885383	0.00120734	0.000362202	0.000321958	0.000402447	0.00100612	0.00253542	0.00165003	0.000402447
OTU_18256	0.00106088	0.27366	k__Bacteria; p__Verrucomicrobia; c__Opitutae; o__[Cerasicoccales]; f__[Cerasicoccaceae]; g__; s__	0.00209272	0.00108661	0.00132807	0.000482936	0.000764649	0.000804894	0.00165003	0.0015293	0.00185126	0.0218126	0.016782	0.0239456	0.00177077	0.000201223	0.00136832	0.00165003	0.00156954	0.00185126	8.04894e-05	0.000442692	0.000201223	0.00193175	0.00197199	0.00273664	8.04894e-05	0.000160979	0.000201223	0.00120734	0.000724404	0.00068416	0.00169028	0.00213297	0.000563426	0.00112685	0.00124759	0.000925628	0.000764649	0.000804894	0.00136832	0.000643915	0.00209272	0.0011671	0.00132807	0.00132807	0.00165003	0.000281713
OTU_18614	0.00109234	0.272769	k__Bacteria; p__Actinobacteria; c__Actinobacteria; o__Actinomycetales; f__Microbacteriaceae; g__Candidatus Rhodoluna; s__	0	8.04894e-05	8.04894e-05	0.000120734	0	0	4.02447e-05	0.000160979	0	0.000885383	0.00169028	0.00132807	0.000120734	4.02447e-05	8.04894e-05	0	4.02447e-05	0	4.02447e-05	0	0	0.000643915	0.00060367	0.000643915	0	4.02447e-05	0	4.02447e-05	4.02447e-05	4.02447e-05	0	0.000160979	8.04894e-05	4.02447e-05	4.02447e-05	0	8.04894e-05	0.000281713	0.000201223	8.04894e-05	8.04894e-05	0.000201223	0	0.000160979	0.000160979	0
OTU_151	0.00110897	0.272307	k__Bacteria; p__Bacteroidetes; c__Cytophagia; o__Cytophagales; f__Cytophagaceae; g__Flectobacillus; s__	0.000523181	0.000281713	0.000241468	0.000442692	0.000402447	0.000523181	0.000402447	0.00068416	0.00060367	0.00120734	0.0011671	0.00060367	0.000402447	0.000442692	0.000804894	0.000965873	0.000804894	0.000764649	0.000241468	0.000362202	0.000402447	0.00136832	0.00060367	0.000442692	0.000120734	0.000120734	0.000160979	0.000402447	0.000241468	0.000362202	0.000523181	0.000362202	0.000563426	0.000482936	0.000120734	0.000362202	0.000402447	0.000160979	0.000402447	0.000362202	0.00068416	0.00068416	0.000764649	0.000402447	0.000523181	0.000321958
OTU_1981	0.00119128	0.270117	k__Bacteria; p__Proteobacteria; c__Alphaproteobacteria; o__Sphingomonadales; f__; g__; s__	0.00124759	0.00148905	0.0011671	0.00205248	0.00313909	0.00325982	0.00144881	0.00108661	0.00253542	0.000643915	0.000523181	0.000724404	0.0022537	0.0022537	0.00229395	0.00241468	0.00213297	0.00193175	0.00394398	0.00418545	0.00350129	0.00112685	0.00132807	0.00124759	0.0011671	8.04894e-05	0.00128783	0.00229395	0.00301835	0.00289762	0.0026159	0.00362202	0.00366227	0.00132807	0.00132807	0.00213297	0.000563426	0.000241468	0.000643915	0.000885383	0.000804894	0.000724404	0.000160979	0.000160979	0.000201223	0.000321958
OTU_332	0.00119911	0.269916	k__Bacteria; p__Firmicutes; c__Bacilli; o__Lactobacillales; f__Lactobacillaceae; g__Lactobacillus; s__	0.000201223	0.000201223	0.000241468	0.000201223	0.000120734	0.000241468	0.000120734	0.000120734	0	0.000241468	4.02447e-05	0	8.04894e-05	8.04894e-05	0.000120734	0	8.04894e-05	0.000160979	0.000120734	8.04894e-05	0.000201223	8.04894e-05	0.000160979	8.04894e-05	0.000160979	0.000160979	0.000402447	4.02447e-05	4.02447e-05	0.000120734	0.000120734	0.000120734	8.04894e-05	0.000241468	0.000160979	0.000201223	0.000201223	0.000201223	0.00165003	0	8.04894e-05	0.000160979	0.000281713	0.000281713	0.000241468	0.000160979
OTU_194	0.00120868	0.269673	k__Bacteria; p__Cyanobacteria; c__Chloroplast; o__Stramenopiles; f__; g__; s__	8.04894e-05	0.000201223	0.000160979	0.000160979	0.000281713	0.000281713	0.000281713	0.000120734	0.000281713	0.000482936	0.000563426	0.00128783	0.000120734	0.000281713	0.000120734	0.000362202	0.000201223	0.000442692	4.02447e-05	4.02447e-05	0	0.000241468	0.000321958	0.000160979	4.02447e-05	0	0.000120734	0.000281713	8.04894e-05	0.000160979	0.000160979	0.000241468	0.000120734	0.000201223	8.04894e-05	0.000160979	0.000321958	0.000241468	0.000321958	0.000201223	0.000845138	0.000402447	0.0018915	0.000563426	0.00108661	0.000281713
OTU_100	0.00121056	0.269625	k__Bacteria; p__Cyanobacteria; c__Chloroplast; o__Chlorophyta; f__Chlamydomonadaceae; g__; s__	0.00100612	0.00100612	0.00173052	0.00177077	0.00148905	0.00128783	0.00165003	0.00160979	0.00374276	0.000362202	0.000241468	0.000160979	0.000563426	0.000804894	0.000965873	0.00177077	0.00217321	0.00245493	0.000321958	0.000321958	8.04894e-05	0.000201223	0.000402447	4.02447e-05	0.000402447	0.000160979	0.000120734	0.00156954	0.000643915	0.0011671	0.00100612	0.000402447	0.00112685	0.00124759	0.000201223	0.00136832	0.00297811	0.00205248	0.00205248	0.00160979	0.000764649	0.000965873	0.0060367	0.000764649	0.00177077	0.00060367
OTU_258	0.00139578	0.265243	k__Bacteria; p__Planctomycetes; c__Planctomycetia; o__Gemmatales; f__Gemmataceae; g__; s__	0.000482936	0.000764649	0.00108661	0.000643915	0.000482936	0.000442692	0.000160979	0.000281713	0.000442692	0	4.02447e-05	0	0.000120734	0.000523181	0.000321958	0.000321958	0.000523181	0.000281713	8.04894e-05	4.02447e-05	4.02447e-05	0	0	0	0.000845138	0.000362202	0.0011671	0.000201223	0.000201223	0.000442692	0.000442692	0.000201223	0.000321958	0.000201223	0.000321958	0.000321958	0.000160979	0.000241468	0.000120734	0.000120734	0	0	0.000120734	4.02447e-05	4.02447e-05	4.02447e-05
OTU_492	0.00148933	0.263236	k__Bacteria; p__Proteobacteria; c__Alphaproteobacteria; o__Rhodobacterales; f__Rhodobacteraceae; g__Rhodobacter; s__	0.000241468	0.000523181	0.000241468	0.00104636	0.00120734	0.000885383	0.000120734	0.000241468	0.000563426	0.000120734	0	8.04894e-05	0.000160979	0.000482936	0.000362202	0.000362202	0.000563426	0.000442692	0.000281713	0.000523181	8.04894e-05	0.000281713	0.000362202	0.000120734	0.0011671	0.000764649	0.00140856	0.000523181	0.00108661	0.00112685	0.000201223	0.000321958	8.04894e-05	8.04894e-05	0.000281713	8.04894e-05	0.000241468	0.000160979	0.000402447	8.04894e-05	0.000160979	0	8.04894e-05	4.02447e-05	4.02447e-05	4.02447e-05
OTU_13757	0.00157332	0.261534	k__Bacteria; p__Proteobacteria; c__Betaproteobacteria; o__Burkholderiales; f__Comamonadaceae; g__Acidovorax; s__	0.00132807	0.00124759	0.0011671	0.00112685	0.00060367	0.000764649	0.000523181	0.000482936	0.000482936	0.00338055	0.00330006	0.00265615	0.00173052	0.00136832	0.0018915	0.000402447	0.000321958	0.000724404	0.00173052	0.00245493	0.00209272	0.00374276	0.00470863	0.00458789	0.000925628	0.0011671	0.000845138	0.000845138	0.0018915	0.00112685	0.000563426	0.00068416	0.000563426	0.00120734	0.000804894	0.000482936	0.000281713	0.000442692	0.00104636	0.00173052	0.0015293	0.0011671	0.00060367	0.000160979	0.000442692	0.00233419
OTU_26	0.00167136	0.259653	k__Bacteria; p__Bacteroidetes; c__Sphingobacteriia; o__Sphingobacteriales; f__; g__; s__	0.00277688	0.000563426	0.00136832	0.00269639	0.00181101	0.00209272	0.0030586	0.00309884	0.00354153	0.0053123	0.00454765	0.00394398	0.00185126	0.00104636	0.00237444	0.00418545	0.00346104	0.00350129	0.000402447	0.00297811	0.00108661	0.00277688	0.00297811	0.00277688	0.000120734	0.000362202	0.000362202	0.00136832	0.00108661	0.00112685	0.00362202	0.00237444	0.00205248	0.00253542	0.00177077	0.00257566	0.00124759	0.000925628	0.00120734	0.0022537	0.00253542	0.00233419	0.00490985	0.00418545	0.00543303	0.00213297
OTU_57	0.00172498	0.258668	k__Bacteria; p__Proteobacteria; c__Betaproteobacteria; o__Burkholderiales; f__Alcaligenaceae; g__; s__	0.000764649	0.00205248	0.000885383	0.00156954	0.00185126	0.00165003	0.000845138	0.000885383	0.00112685	0.0060367	0.00583548	0.00688184	0.00177077	0.00217321	0.00209272	0.000764649	0.0015293	0.00124759	0.00201223	0.00144881	0.00108661	0.00169028	0.00128783	0.00132807	0.00104636	0.000885383	0.000885383	0.00136832	0.00140856	0.00213297	0.00104636	0.00120734	0.00124759	0.000523181	0.00068416	0.00068416	0.000643915	0.000241468	0.00068416	0.000523181	0.000804894	0.000523181	0.000160979	0.000442692	0.000764649	0.000764649
OTU_317	0.00195849	0.254693	k__Bacteria; p__Proteobacteria; c__Gammaproteobacteria; o__Legionellales; f__Legionellaceae; g__; s__	0.000563426	0.00104636	0.000845138	0.000120734	0	0.000201223	4.02447e-05	0.000201223	0.000321958	0	0	0	8.04894e-05	8.04894e-05	8.04894e-05	0.000120734	0.000120734	0.000201223	0.000201223	0.000120734	4.02447e-05	0.000201223	0.000442692	0.000321958	0	4.02447e-05	4.02447e-05	0.000120734	4.02447e-05	0.000241468	4.02447e-05	0.000160979	8.04894e-05	0	0.000120734	8.04894e-05	0.000442692	0.000362202	0.000120734	0.000120734	0.000120734	8.04894e-05	0.000724404	0.000643915	0.000845138	0.000442692
OTU_8733	0.00197929	0.254361	k__Bacteria; p__Bacteroidetes; c__Flavobacteriia; o__Flavobacteriales; f__Cryomorphaceae; g__Fluviicola; s__	0.00173052	0.000845138	0.000845138	0.000724404	0.000523181	0.000563426	0.000845138	0.00068416	0.000563426	0.00450741	0.00253542	0.00398422	0.000402447	0.000321958	0.000201223	0.000764649	0.000724404	0.000965873	0	0.000241468	0.000160979	0.0112685	0.0107453	0.0098197	0.00104636	0.00181101	0.00140856	0.000402447	0.000482936	0.000362202	0.000925628	0.000482936	0.000482936	0.000442692	0.000321958	0.000804894	0.000160979	0.000281713	0.000321958	0.000724404	0.000523181	0.00068416	0.000643915	0.000281713	0.000563426	0.000523181
OTU_255	0.00213852	0.251925	k__Bacteria; p__Planctomycetes; c__Planctomycetia; o__Planctomycetales; f__Planctomycetaceae; g__Planctomyces; s__	0.000523181	0.000643915	0.000643915	0.000482936	0.00068416	0.000281713	0.000281713	0.000201223	0.00060367	4.02447e-05	4.02447e-05	0	8.04894e-05	0.000563426	0.000362202	0.000241468	0.000402447	0.000804894	4.02447e-05	0.000201223	0	0.000321958	0.000241468	0.000160979	0.00128783	0.00108661	0.00104636	0.000563426	0.000563426	0.000724404	0.000241468	8.04894e-05	4.02447e-05	0.000201223	0.000120734	4.02447e-05	0.000120734	0.000362202	0.000160979	0	0	0	4.02447e-05	0	8.04894e-05	4.02447e-05
OTU_17859	0.00219612	0.251086	k__Bacteria; p__Actinobacteria; c__Actinobacteria; o__Actinomycetales; f__ACK-M1; g__; s__	0.00241468	0.00321958	0.00309884	0.00382325	0.0026159	0.00313909	0.0041452	0.00515132	0.00289762	0.00748551	0.0106648	0.00829041	0.0034208	0.00148905	0.00241468	0.00470863	0.00325982	0.00293786	8.04894e-05	0.00068416	0.000402447	0.000281713	0.000201223	0.000241468	0.000523181	0.000321958	0.000241468	0.0026159	0.00177077	0.0018915	0.003783	0.00466838	0.00366227	0.00213297	0.00346104	0.00406471	0.00185126	0.0015293	0.00128783	0.00265615	0.00233419	0.00325982	0.00209272	0.00579524	0.00490985	0.00213297
OTU_9049	0.00234607	0.248995	k__Bacteria; p__Proteobacteria; c__Gammaproteobacteria; o__Pseudomonadales; f__Moraxellaceae; g__Acinetobacter	0.000321958	0.000241468	0.000120734	0.000321958	0.00068416	0.000442692	0.000201223	4.02447e-05	0.000120734	0.000241468	0.000120734	0	0.000321958	0.0228992	0.00140856	0.000160979	0.000241468	0.000241468	0.000885383	0.000160979	0.0139247	0.000120734	0.000120734	0	0.00418545	0.00140856	0.00350129	0.0157759	0.000402447	0.000925628	0.000482936	0.000201223	0.000482936	0.000281713	0.000201223	0.000241468	0.000201223	0.000442692	0.0018915	4.02447e-05	0.000563426	0.000362202	0.000402447	0.000281713	0.000120734	0.000120734
OTU_20362	0.00234958	0.248948	k__Bacteria; p__Bacteroidetes; c__[Saprospirae]; o__[Saprospirales]; f__Chitinophagaceae; g__; s__	0.00060367	0.000965873	0.00108661	0.000120734	0.000120734	0.000442692	0.000925628	0.000482936	0.000764649	8.04894e-05	0	8.04894e-05	0.000724404	0.000523181	0.000804894	0.000764649	0.000724404	0.00128783	8.04894e-05	0.000241468	4.02447e-05	0.000241468	0.000120734	4.02447e-05	8.04894e-05	0	4.02447e-05	0.000362202	0.000482936	0.000241468	0.00068416	0.00060367	0.000523181	0.0015293	0.00148905	0.00140856	0.00177077	0.0011671	0.00136832	0.00426594	0.0041452	0.00394398	0.00418545	0.00301835	0.00358178	0.00185126
OTU_102	0.00247516	0.247295	k__Bacteria; p__Proteobacteria; c__Betaproteobacteria; o__Rhodocyclales; f__Rhodocyclaceae; g__C39; s__	8.04894e-05	0	8.04894e-05	0.000120734	0.000160979	8.04894e-05	0.000120734	4.02447e-05	0.000160979	0.000120734	8.04894e-05	0	0.000724404	0.000482936	0.000764649	4.02447e-05	0.000241468	8.04894e-05	4.02447e-05	4.02447e-05	8.04894e-05	0.00519156	0.0049501	0.00655988	4.02447e-05	8.04894e-05	0	8.04894e-05	0.000201223	4.02447e-05	0.000160979	0.000321958	0.000160979	0.000241468	8.04894e-05	0	4.02447e-05	0.000120734	4.02447e-05	8.04894e-05	0.000160979	8.04894e-05	4.02447e-05	4.02447e-05	0	0.00144881
OTU_14799	0.00248173	0.247211	k__Bacteria; p__[Thermi]; c__Deinococci; o__Deinococcales; f__Deinococcaceae; g__Deinococcus; s__	0.000362202	0.000120734	0.000281713	8.04894e-05	0.000241468	0.000160979	0.000201223	0.000160979	0.000120734	0.000281713	8.04894e-05	8.04894e-05	0.000523181	0.0018915	0.000241468	0.000120734	8.04894e-05	0.000482936	0.00639891	0.0030586	0.00148905	0.000281713	0.000281713	0.000120734	0.000402447	0.000201223	0.000563426	0.0011671	0.00241468	0.00140856	0.000120734	4.02447e-05	0.000281713	0.000965873	0.00217321	0.000442692	0.00410496	0.00563426	0.00301835	0.000281713	0.000201223	4.02447e-05	0.000845138	8.04894e-05	4.02447e-05	0.000241468
OTU_4	0.00250067	0.246969	k__Bacteria; p__Actinobacteria; c__Actinobacteria; o__Actinomycetales; f__ACK-M1; g__; s__	0.000160979	0.000201223	8.04894e-05	0.000201223	0.000160979	0.000201223	0.000120734	0.000201223	0.000120734	0.00104636	0.00136832	0.000362202	0.000201223	0	8.04894e-05	0.000160979	4.02447e-05	0.000281713	8.04894e-05	8.04894e-05	0.000120734	4.02447e-05	0.000160979	0	0.000201223	0.000120734	8.04894e-05	4.02447e-05	0.000201223	0.000120734	0.000321958	0.000281713	0.000201223	0.000241468	0.000201223	0.000201223	8.04894e-05	0.000120734	4.02447e-05	0.000201223	0.000160979	0.000241468	0.000120734	0.000241468	0.000362202	8.04894e-05
OTU_82	0.00252256	0.246692	k__Bacteria; p__Proteobacteria; c__Betaproteobacteria; o__Burkholderiales; f__Comamonadaceae; g__; s__	0.000845138	0.00112685	0.0011671	0.00338055	0.00454765	0.00245493	0.000804894	0.000563426	0.000965873	4.02447e-05	0.000281713	0.000120734	0.00140856	0.0011671	0.0015293	0.000724404	0.00173052	0.0015293	0.00515132	0.0112283	0.00354153	0.00120734	0.00112685	0.00233419	0.00253542	0.00273664	0.00229395	0.0018915	0.00277688	0.00173052	0.00108661	0.00132807	0.000160979	0.00104636	0.00144881	0.000442692	0.000201223	0.000281713	0.000804894	0.000120734	0.000120734	0.000201223	0.000321958	8.04894e-05	4.02447e-05	0.000523181
OTU_78	0.0026546	0.245067	k__Bacteria; p__Planctomycetes; c__Planctomycetia; o__Gemmatales; f__Gemmataceae; g__; s__	0.000804894	0.0015293	0.00100612	0.00269639	0.00245493	0.0011671	0.000804894	0.000845138	0.00201223	8.04894e-05	0	4.02447e-05	0.000885383	0.00217321	0.00104636	0.00205248	0.0018915	0.00362202	0.000442692	0.000643915	8.04894e-05	4.02447e-05	8.04894e-05	0	0.00165003	0.000764649	0.00112685	0.00293786	0.00173052	0.00297811	0.00354153	0.00112685	0.00213297	0.0022537	0.000643915	0.0022537	0.000885383	0.00060367	0.000885383	0.000160979	0	0	0.000201223	4.02447e-05	0.000120734	4.02447e-05
OTU_236	0.00266059	0.244995	k__Bacteria; p__Proteobacteria; c__Betaproteobacteria; o__Methylophilales	0.00068416	0.000724404	0.000482936	0.000362202	0.00104636	0.000804894	0.000160979	0.000160979	0.000241468	0	0	0	0.00060367	0.00068416	0.000925628	0.000160979	0.000201223	0.000160979	0.000482936	0.000523181	0.0011671	0.000120734	0	0	0	4.02447e-05	0	0.000201223	0.000241468	0	4.02447e-05	0	4.02447e-05	8.04894e-05	8.04894e-05	8.04894e-05	0.000120734	8.04894e-05	4.02447e-05	0.000321958	0.000442692	0.000281713	4.02447e-05	0	0	0.000563426
OTU_13034	0.00285235	0.242771	k__Bacteria; p__Verrucomicrobia; c__Opitutae; o__[Cerasicoccales]; f__[Cerasicoccaceae]; g__; s__	0.00350129	0.00165003	0.00217321	0.0011671	0.000804894	0.00160979	0.00205248	0.0018915	0.00249517	0.0318738	0.0234627	0.0381117	0.00197199	0.00060367	0.00217321	0.00197199	0.00277688	0.00273664	8.04894e-05	0.00068416	8.04894e-05	0.00422569	0.00358178	0.00330006	0.000563426	0.00060367	0.000442692	0.00185126	0.000845138	0.000442692	0.00213297	0.00185126	0.0015293	0.00160979	0.000845138	0.00160979	0.00136832	0.00108661	0.00177077	0.000724404	0.00177077	0.00128783	0.00205248	0.00148905	0.00209272	0.000643915
OTU_17754	0.00302787	0.240856	k__Bacteria; p__Actinobacteria; c__Actinobacteria; o__Actinomycetales; f__ACK-M1; g__; s__	0.000160979	4.02447e-05	4.02447e-05	0.000120734	4.02447e-05	0.000281713	0.000160979	0.000201223	0.000160979	0.000804894	0.00128783	0.000845138	0.000201223	4.02447e-05	0.000120734	0.000201223	0.000160979	0.000120734	0	8.04894e-05	0	0.000201223	0.000120734	8.04894e-05	0.000160979	0.000120734	8.04894e-05	0.000281713	4.02447e-05	4.02447e-05	0.000160979	8.04894e-05	0.000201223	0.000321958	0.000321958	0.000201223	0.000120734	0.000201223	0.000281713	0.000281713	0.000120734	0.000281713	0.000120734	0.000281713	0.000482936	0.000201223
OTU_9724	0.00308783	0.240226	k__Bacteria; p__Proteobacteria; c__Alphaproteobacteria; o__Sphingomonadales; f__; g__; s__	0.000885383	0.00104636	0.0011671	0.00317933	0.00354153	0.00209272	0.00156954	0.00169028	0.0030586	0	8.04894e-05	0	0.00165003	0.00201223	0.00201223	0.00293786	0.00269639	0.0026159	0.000321958	0.000281713	0.000321958	0.000241468	0.000201223	0.000201223	0.00539279	0.00197199	0.00289762	0.00281713	0.00321958	0.00426594	0.00330006	0.00366227	0.00358178	0.00177077	0.00181101	0.00245493	0.000402447	0.000402447	0.000402447	0.000201223	4.02447e-05	8.04894e-05	8.04894e-05	0.000120734	0.000241468	8.04894e-05
OTU_6758	0.00316361	0.239446	k__Bacteria; p__Proteobacteria; c__Alphaproteobacteria; o__Sphingomonadales; f__; g__; s__	0.000482936	0.000845138	0.000845138	0.00068416	0.000160979	0.000804894	0.000482936	0.000362202	0.000965873	0.000201223	0.000241468	0.000321958	0.000482936	0.000362202	0.000563426	0.000482936	0.000724404	0.000724404	0.00136832	0.00148905	0.00124759	0.000523181	0.000885383	0.000442692	0.00060367	0	0.000724404	0.00068416	0.000523181	0.000362202	0.000643915	0.000845138	0.00104636	0.000523181	0.000764649	0.000281713	4.02447e-05	0.000120734	4.02447e-05	4.02447e-05	0.000402447	4.02447e-05	4.02447e-05	0	4.02447e-05	0.000120734
OTU_175	0.00317798	0.2393	k__Bacteria; p__Proteobacteria; c__Alphaproteobacteria; o__Sphingomonadales; f__; g__; s__	0.00169028	0.00177077	0.00132807	0.000482936	0.000362202	0.00060367	8.04894e-05	0.000120734	0.000965873	4.02447e-05	4.02447e-05	0.000160979	0.000402447	0.00112685	0.000845138	8.04894e-05	0.000281713	0.000321958	0.00185126	0.000160979	0.00060367	8.04894e-05	8.04894e-05	4.02447e-05	0.000482936	0.000160979	0.000241468	0.000281713	0.000402447	0.000442692	0.000160979	0.000321958	4.02447e-05	0.000241468	0.000281713	8.04894e-05	0.000201223	4.02447e-05	0.000160979	0.000160979	8.04894e-05	4.02447e-05	4.02447e-05	0.000120734	0	0.000201223
OTU_1256	0.00337995	0.237313	k__Bacteria; p__Cyanobacteria; c__Synechococcophycideae; o__Synechococcales; f__Synechococcaceae; g__Synechococcus; s__	0.00237444	0.00253542	0.00321958	0.000402447	0.000321958	0.000281713	0.000321958	0.000442692	0.00160979	0.00068416	0.000563426	0.000885383	0.000160979	0.000804894	0.000321958	0.000321958	0.000804894	0.00104636	8.04894e-05	0	0	0.000160979	0.000160979	0.000160979	0.000120734	4.02447e-05	0	0.000523181	0.00060367	0.000442692	0.000321958	0.000241468	0.000160979	0.000482936	0.000120734	0.000885383	0.00301835	0.00293786	0.00285737	0.00132807	0.0011671	0.00100612	0.00112685	0.000362202	0.000724404	0.000160979
OTU_1550	0.00344216	0.236724	k__Bacteria; p__Proteobacteria; c__Alphaproteobacteria; o__Sphingomonadales; f__; g__; s__	0.00177077	0.00201223	0.00181101	0.00068416	0.00165003	0.000885383	0.000402447	0.000442692	0.000804894	0.00100612	0.000523181	0.000965873	0.000362202	0.000563426	0.000281713	0.000321958	0.00068416	0.000885383	0.00177077	0.00181101	0.00128783	0.000523181	0.000643915	0.000523181	0.00507083	0.00241468	0.00285737	0.000724404	0.000885383	0.00108661	0.000442692	0.000643915	0.000643915	0.000321958	0.000643915	0.000281713	0.000442692	0.000402447	0.000201223	0.00060367	0.00060367	0.000362202	0.000201223	0.000120734	0.000201223	8.04894e-05
OTU_17	0.00347501	0.236417	k__Bacteria; p__Proteobacteria; c__Gammaproteobacteria; o__Pseudomonadales; f__Moraxellaceae; g__Acinetobacter; s__	0.00144881	0.00156954	0.00100612	0.00249517	0.00362202	0.0026159	0.00100612	0.00060367	0.000885383	0.000845138	0.00060367	0.00068416	0.00422569	0.169873	0.0404459	0.000925628	0.00136832	0.0011671	0.0034208	0.00124759	0.0916774	0.00120734	0.00148905	0.00112685	0.0107051	0.0171442	0.0121137	0.0418142	0.00169028	0.00265615	0.000724404	0.00221346	0.00229395	0.0049501	0.00503059	0.00716355	0.00221346	0.00205248	0.00169028	0.00181101	0.00197199	0.00221346	0.0087331	0.00104636	0.00112685	0.00450741
OTU_20071	0.00357719	0.235479	k__Bacteria; p__Bacteroidetes; c__Flavobacteriia; o__Flavobacteriales; f__Cryomorphaceae; g__Fluviicola; s__	0.000925628	0.00060367	0.000804894	0.000845138	0.000402447	0.000402447	0.000724404	0.000482936	0.000321958	4.02447e-05	0	4.02447e-05	0.000321958	0.000281713	0.000523181	0.000804894	0.000724404	0.000724404	4.02447e-05	4.02447e-05	0	0.000201223	4.02447e-05	8.04894e-05	0	0	4.02447e-05	0.000201223	0.000362202	0.000482936	0.00060367	0.00068416	0.000643915	0.000402447	0.000160979	0.000201223	0.000201223	0	0.000241468	0.000241468	0.000563426	0.000120734	0.00205248	0.00185126	0.00165003	0.000362202
OTU_6842	0.00358961	0.235367	k__Bacteria; p__Proteobacteria; c__Gammaproteobacteria; o__Xanthomonadales; f__Xanthomonadaceae; g__Lysobacter; s__	0.000120734	0.000362202	0.000120734	0.000120734	0.000523181	0.000201223	4.02447e-05	8.04894e-05	0.000241468	0.000120734	4.02447e-05	4.02447e-05	0.000120734	0.000482936	0.000241468	8.04894e-05	0.000281713	0.000402447	0.00148905	0.00181101	0.00124759	8.04894e-05	8.04894e-05	0.000241468	0.00374276	0.00297811	0.00313909	0.00068416	0.000885383	0.00100612	4.02447e-05	0.000160979	0.000241468	0.00068416	0.00321958	0.000764649	0.000201223	0.000845138	0.000201223	0	0.000241468	4.02447e-05	0.00140856	0.000402447	0.000120734	0.000482936
OTU_235	0.00364434	0.234876	k__Bacteria; p__Verrucomicrobia; c__[Spartobacteria]; o__[Chthoniobacterales]; f__[Chthoniobacteraceae]; g__Candidatus Xiphinematobacter; s__	0.000160979	0.000643915	0.000281713	0.00108661	0.00136832	0.00177077	0.000120734	0.000402447	0.00108661	0	0	0	0.000201223	0.0011671	0.000764649	0.000160979	0.000482936	0.000321958	0.000201223	0.000482936	8.04894e-05	0	0	0	0	0	4.02447e-05	0.000885383	0.00060367	0.00068416	0.000482936	0.000241468	0.000241468	0.000362202	8.04894e-05	0.000523181	0.000120734	0.000120734	0.000281713	0	0	0	0	0	0	0
OTU_16782	0.00371643	0.234241	k__Bacteria; p__Proteobacteria; c__Betaproteobacteria; o__Burkholderiales; f__Comamonadaceae; g__Diaphorobacter; s__	0.000201223	0.000442692	0.000201223	4.02447e-05	0.000160979	0.000120734	8.04894e-05	0.000160979	4.02447e-05	0.00120734	0.000965873	0.00100612	0.000321958	0.000402447	0.000321958	0.000160979	8.04894e-05	0.000120734	0.000643915	0.000482936	0.000321958	0.000442692	0.000442692	0.000482936	0.000201223	8.04894e-05	0.000201223	0.000160979	4.02447e-05	0.000321958	0.000201223	0.000241468	0.000160979	8.04894e-05	0.000120734	0.000201223	0.000201223	0.000120734	0.000160979	0.000241468	0.000120734	0.000362202	8.04894e-05	4.02447e-05	4.02447e-05	0.000281713
OTU_233	0.00436537	0.228996	k__Bacteria; p__Proteobacteria; c__Betaproteobacteria; o__MWH-UniP1; f__; g__; s__	8.04894e-05	0.000120734	0.000160979	8.04894e-05	8.04894e-05	0.000120734	8.04894e-05	0.000362202	4.02447e-05	0.00068416	0.00136832	0.00068416	0.000120734	0.000201223	0.000362202	8.04894e-05	0.000120734	8.04894e-05	0.000201223	0.000523181	0	4.02447e-05	0	0	0	0	0	8.04894e-05	4.02447e-05	0	8.04894e-05	0.000160979	8.04894e-05	0.000160979	0.000120734	0.000241468	8.04894e-05	0.000120734	8.04894e-05	4.02447e-05	4.02447e-05	0.000120734	0	4.02447e-05	8.04894e-05	4.02447e-05
OTU_276	0.00440676	0.228687	k__Bacteria; p__Proteobacteria; c__Gammaproteobacteria; o__Alteromonadales; f__HTCC2188; g__HTCC; s__	0.000241468	8.04894e-05	0.000201223	0.000241468	4.02447e-05	4.02447e-05	0.000160979	0.000241468	0.000281713	0.000120734	8.04894e-05	0.000201223	0.000120734	0.000120734	0.000160979	0.000120734	0.000160979	0.000281713	0	4.02447e-05	8.04894e-05	0.000442692	0.000563426	0.000442692	4.02447e-05	8.04894e-05	4.02447e-05	4.02447e-05	4.02447e-05	8.04894e-05	0.000281713	8.04894e-05	0.000321958	0.000281713	0.000160979	0.000442692	0.000321958	0.000201223	0.000241468	0	4.02447e-05	0	0.000321958	0.000281713	0.000523181	0.000201223
OTU_438	0.00444448	0.228407	k__Bacteria; p__Proteobacteria; c__Gammaproteobacteria; o__Pseudomonadales; f__Moraxellaceae; g__Agitococcus; s__lubricus	8.04894e-05	0.000120734	0	8.04894e-05	4.02447e-05	8.04894e-05	0	8.04894e-05	4.02447e-05	0	4.02447e-05	0	0.000120734	4.02447e-05	0.000160979	0	0.000120734	4.02447e-05	0	4.02447e-05	0	0	0	4.02447e-05	0	0	4.02447e-05	0.00144881	0.000201223	4.02447e-05	0.000281713	0.000120734	0	0.000120734	4.02447e-05	8.04894e-05	0.000241468	0.000160979	0.0015293	0	4.02447e-05	0	4.02447e-05	0.000523181	0	4.02447e-05
OTU_5977	0.00462103	0.22713	k__Bacteria; p__Proteobacteria; c__Gammaproteobacteria; o__Pseudomonadales; f__Moraxellaceae; g__Acinetobacter; s__	0	0	0	8.04894e-05	0	8.04894e-05	0	0	0	0	0	0	4.02447e-05	0.00237444	0.00060367	0	0	0	8.04894e-05	0	0.000724404	4.02447e-05	0	0	4.02447e-05	4.02447e-05	0	0.000201223	0	4.02447e-05	8.04894e-05	4.02447e-05	0	0	4.02447e-05	4.02447e-05	4.02447e-05	0.000120734	8.04894e-05	8.04894e-05	0	0	8.04894e-05	0	4.02447e-05	4.02447e-05
OTU_105	0.00499605	0.224563	k__Bacteria; p__Proteobacteria; c__Alphaproteobacteria; o__Sphingomonadales; f__Erythrobacteraceae; g__; s__	0.000321958	0.00060367	0.000402447	0.000482936	0.000643915	0.000563426	0.000281713	0.000362202	0.00060367	0.000241468	0.000160979	0.000120734	0.000241468	0.0011671	0.000201223	0.000482936	0.000402447	0.000563426	0.00281713	0.00281713	0.00237444	0.000362202	0.000402447	0.000160979	0.0026159	0.00482936	0.00193175	0.000643915	0.000764649	0.000563426	0.000321958	0.000442692	0.000321958	0.000523181	0.00221346	0.000241468	0.000764649	0.00120734	0.000482936	0.000442692	0.000965873	0.000402447	0.00100612	0.000160979	0.000241468	0.000402447
OTU_14336	0.00503133	0.224331	k__Bacteria; p__Proteobacteria; c__Betaproteobacteria; o__Burkholderiales; f__Oxalobacteraceae; g__Janthinobacterium; s__	0.000563426	0.000321958	0.000442692	0.00060367	0.000804894	0.000281713	0.000201223	0.000241468	0.000523181	0.000281713	0.000563426	0.000563426	0.000523181	0.00060367	0.000563426	0.000402447	0.000442692	0.000321958	0.0018915	0.0011671	0.000925628	0.000241468	0.000643915	0.000482936	0.00120734	0.00253542	0.0015293	0.00169028	0.00221346	0.00140856	0.000321958	0.000321958	0.000281713	0.00068416	0.000482936	0.000281713	0.0022537	0.00156954	0.00160979	0.000362202	0.000362202	0.000281713	0.000160979	0.000442692	0.000160979	0.000523181
OTU_36	0.00559702	0.220807	k__Bacteria; p__Actinobacteria; c__Actinobacteria; o__Actinomycetales; f__Microbacteriaceae; g__Candidatus Rhodoluna; s__	0.000523181	0.000764649	0.000523181	0.000643915	0.000925628	0.000643915	0.000201223	0.000362202	0.000764649	0.0140052	0.0140454	0.013321	0.000925628	0.000523181	0.000643915	0.000563426	0.000724404	0.000402447	0.000442692	0.000925628	0.000845138	0.011671	0.0126771	0.0108661	0.0124759	0.00309884	0.00599646	0.000362202	0.000804894	0.00160979	0.00201223	0.00136832	0.00100612	0.000724404	0.000442692	0.000643915	0.000201223	0.000402447	0.00060367	0.000281713	0.000321958	0.000402447	0.000201223	0.000362202	0.000362202	0.000643915
OTU_11	0.00563388	0.22059	k__Bacteria; p__Verrucomicrobia; c__Opitutae; o__[Cerasicoccales]; f__[Cerasicoccaceae]; g__; s__	4.02447e-05	0	0.000120734	4.02447e-05	8.04894e-05	0	4.02447e-05	4.02447e-05	4.02447e-05	0.00100612	0.000885383	0.000885383	0.000201223	0	0	4.02447e-05	0.000160979	4.02447e-05	0	4.02447e-05	0	4.02447e-05	0.000120734	0.000201223	0	0	0	4.02447e-05	0	4.02447e-05	0	8.04894e-05	0	0	8.04894e-05	4.02447e-05	0.000120734	4.02447e-05	0	0	8.04894e-05	0	4.02447e-05	0	8.04894e-05	0
OTU_49	0.00568276	0.220303	k__Bacteria; p__Bacteroidetes; c__Flavobacteriia; o__Flavobacteriales; f__Cryomorphaceae; g__; s__	0.00462814	0.00165003	0.00253542	0.00124759	0.00068416	0.00156954	0.00229395	0.00237444	0.00245493	0.00499034	0.00350129	0.00591597	0.00209272	0.00120734	0.00269639	0.00249517	0.00281713	0.00334031	0	0.000563426	0.000321958	0.00128783	0.000643915	0.000523181	0.000160979	0	0	0.0011671	0.00120734	0.00100612	0.00209272	0.00120734	0.00160979	0.00253542	0.00128783	0.00213297	0.00185126	0.00140856	0.00124759	0.00346104	0.0056745	0.00430618	0.00249517	0.00181101	0.0026159	0.00193175
OTU_16532	0.00578283	0.219723	k__Bacteria; p__Proteobacteria; c__Betaproteobacteria; o__Burkholderiales; f__Comamonadaceae	0.000321958	0.00060367	0.000643915	0.000120734	0.000201223	0.000241468	0.000442692	0.000281713	0.000201223	0.000241468	0.000402447	0.000160979	0.000643915	0.000482936	0.000482936	0.000241468	0.000402447	0.000482936	0.000321958	0.000563426	0.000523181	0.00209272	0.00237444	0.00370251	0.000281713	0.000201223	0.000241468	0.000321958	0.000925628	0.00068416	0.000160979	0.000402447	0.00060367	0.000362202	0.000160979	0.000201223	0.000201223	0.000120734	0.000321958	0.0011671	0.000402447	0.000885383	0.000120734	0.000120734	8.04894e-05	0.00068416
OTU_13488	0.00599617	0.218518	k__Bacteria; p__Proteobacteria; c__Betaproteobacteria; o__Methylophilales; f__Methylophilaceae; g__Methylotenera; s__mobilis	0.000160979	0	0.000201223	0.000120734	8.04894e-05	8.04894e-05	0.000281713	0.000160979	8.04894e-05	4.02447e-05	0.000120734	0.000241468	8.04894e-05	8.04894e-05	0	4.02447e-05	4.02447e-05	0.000120734	8.04894e-05	4.02447e-05	4.02447e-05	0.000160979	0.000321958	0.000482936	0.000120734	0	0.000120734	4.02447e-05	0.000120734	4.02447e-05	0	0	0	0.000120734	0.000120734	4.02447e-05	8.04894e-05	8.04894e-05	0.000160979	0.000201223	0.000160979	0	0	0	8.04894e-05	4.02447e-05
OTU_7868	0.00618858	0.217466	k__Bacteria; p__Proteobacteria; c__Betaproteobacteria; o__Rhodocyclales; f__Rhodocyclaceae; g__C39; s__	0	0	0	0	0	0	4.02447e-05	0	0	8.04894e-05	0	0	0.000160979	0.000201223	0.000160979	0	0	4.02447e-05	0	8.04894e-05	8.04894e-05	0.0018915	0.00173052	0.00245493	0	0	0	8.04894e-05	4.02447e-05	0	4.02447e-05	8.04894e-05	0	8.04894e-05	0	4.02447e-05	0	0	0	8.04894e-05	8.04894e-05	0	0	0	0	0.000482936
OTU_18933	0.00620957	0.217353	k__Bacteria; p__Actinobacteria; c__Actinobacteria; o__Actinomycetales; f__ACK-M1; g__; s__	0.015454	0.0146088	0.0122746	0.0118319	0.00732453	0.00865261	0.0217724	0.0218529	0.0128783	0.000764649	0.000965873	0.000845138	0.0138039	0.00394398	0.00913554	0.0179894	0.0128381	0.0094575	0.00100612	0.00201223	0.00156954	0.00297811	0.00309884	0.00293786	0.000563426	0.000321958	0.000523181	0.0106246	0.00627817	0.0112685	0.0185126	0.0189552	0.0114697	0.0202833	0.0247102	0.0199614	0.022698	0.0189955	0.0173857	0.0171442	0.0140454	0.0209675	0.0138442	0.0340068	0.0243078	0.00877334
OTU_15055	0.00649904	0.215832	k__Bacteria; p__Proteobacteria; c__Alphaproteobacteria; o__Caulobacterales; f__Caulobacteraceae; g__Brevundimonas; s__diminuta	0.000845138	0.000643915	0.00100612	0.000563426	0.000563426	0.000643915	0.000563426	0.000885383	0.00068416	0.00060367	0.000563426	0.000563426	0.00068416	0.000764649	0.00068416	0.000523181	0.00068416	0.000563426	0.00104636	0.000643915	0.000764649	0.000724404	0.000643915	0.000804894	0.000885383	0.000643915	0.000925628	0.000362202	0.000563426	0.000402447	0.000362202	0.000362202	0.000402447	0.000482936	0.000442692	0.000523181	0.000281713	0.000482936	0.000563426	0.000281713	0.000563426	0.000724404	0.000402447	0.000241468	0.000402447	0.000643915
OTU_38	0.00694955	0.213587	k__Bacteria; p__Proteobacteria; c__Alphaproteobacteria; o__Rhodospirillales; f__Acetobacteraceae; g__; s__	0.00257566	0.00285737	0.00201223	0.00426594	0.00571475	0.00543303	0.0022537	0.00257566	0.00382325	0	4.02447e-05	8.04894e-05	0.00370251	0.00515132	0.00676111	0.0026159	0.00555377	0.00486961	0.000925628	0.00112685	0.000241468	0	8.04894e-05	8.04894e-05	0.000160979	0.000160979	0.000120734	0.00265615	0.0041452	0.00470863	0.00382325	0.00297811	0.00241468	0.00265615	0.00217321	0.00269639	0.00519156	0.00462814	0.00450741	0.0083709	0.00579524	0.00583548	0.00430618	0.00438667	0.00507083	0.00193175
OTU_3293	0.00725657	0.212135	k__Bacteria; p__Bacteroidetes; c__Flavobacteriia; o__Flavobacteriales; f__Flavobacteriaceae; g__Flavobacterium; s__frigidarium	0.000442692	0.000201223	0.000160979	0.000563426	0.000201223	0.000442692	0.000241468	0.000201223	0.000321958	0.00160979	0.000643915	0.00108661	4.02447e-05	0.000160979	0.000201223	0.000523181	0.00060367	0.000563426	8.04894e-05	0.000201223	0.000362202	0.00169028	0.00205248	0.0011671	0.000804894	0.000321958	0.000523181	0.000241468	0.000321958	0.000241468	0.000482936	0.000362202	8.04894e-05	0.000120734	0.000201223	0.000362202	0.000160979	4.02447e-05	0.000120734	0.000281713	0.000402447	0.000120734	0.000160979	0.000160979	0.000241468	0.000120734
OTU_13548	0.00732654	0.211812	k__Bacteria; p__Cyanobacteria; c__Chloroplast; o__Stramenopiles; f__; g__; s__	0.00197199	0.00104636	0.00165003	0.000965873	0.00068416	0.000885383	0.00104636	0.000563426	0.00128783	0	0	0	0.000523181	0.000482936	0.000764649	0.00100612	0.00100612	0.00108661	0.000482936	0.00313909	0.000362202	0.000402447	0.000523181	0.000402447	8.04894e-05	0.000201223	4.02447e-05	0.00068416	0.000362202	0.000281713	0.000402447	0.00068416	0.000281713	0.00205248	0.00100612	0.0026159	0.00104636	0.00060367	0.000845138	8.04894e-05	8.04894e-05	0	0.000120734	0	0.000120734	4.02447e-05
OTU_17989	0.00745562	0.211224	k__Bacteria; p__Firmicutes; c__Bacilli; o__Bacillales; f__[Exiguobacteraceae]; g__Exiguobacterium; s__	0.000281713	0.0018915	0.00277688	0.000764649	0.00156954	0.000281713	0.00120734	0.000160979	0.00120734	0.00148905	0.000241468	0.00060367	0.00160979	0.000724404	0.000724404	0.000563426	0.000563426	0.00177077	0.00068416	0.000321958	0.000724404	0.000845138	0.000241468	0.000804894	0.00406471	0.00148905	0.0183918	0.00519156	0.00897457	0.0257968	0.000120734	0.000120734	0.000160979	0.00060367	0.000563426	0.000482936	0.00108661	0.000845138	0.000764649	0.000402447	8.04894e-05	0.000281713	0.00120734	0.000201223	0.000241468	0.000724404
OTU_20532	0.00749592	0.211042	k__Bacteria; p__Proteobacteria; c__Betaproteobacteria; o__Burkholderiales; f__Comamonadaceae; g__Limnohabitans; s__	0.00120734	0.00128783	0.00120734	0.00060367	0.00132807	0.00112685	0.000643915	0.000965873	0.00128783	0.000845138	0.00136832	0.000845138	0.00124759	0.00136832	0.00120734	0.000845138	0.00144881	0.000965873	0.00128783	0.000804894	0.00165003	0.000201223	0.000402447	0.000764649	0.000241468	0.00257566	0.000160979	0.000804894	0.000804894	0.000563426	0.00144881	0.00060367	0.00060367	0.00068416	0.000523181	0.000563426	0.000321958	0.000281713	0.000442692	0.000885383	0.000804894	0.000482936	0.000402447	0.000523181	0.000402447	0.000643915
OTU_13060	0.00753282	0.210877	k__Bacteria; p__Proteobacteria; c__Gammaproteobacteria; o__Xanthomonadales; f__Xanthomonadaceae; g__Luteimonas; s__	0.000281713	8.04894e-05	4.02447e-05	0.000160979	0.000321958	0.000120734	0.000160979	0.000201223	0.000160979	8.04894e-05	4.02447e-05	0	8.04894e-05	4.02447e-05	8.04894e-05	0.000201223	0.000241468	0.000160979	0.00173052	0.00104636	0.000764649	8.04894e-05	0.000120734	0.000241468	0.00104636	0.000885383	0.000845138	0.000482936	0.000321958	0.000563426	0.000281713	0.000241468	0.000120734	0.000321958	0.000321958	8.04894e-05	0.000120734	0.000120734	0.000201223	4.02447e-05	4.02447e-05	0	0.000160979	4.02447e-05	8.04894e-05	0.000120734
OTU_12680	0.0077861	0.209761	k__Bacteria; p__Proteobacteria; c__Alphaproteobacteria; o__Rhizobiales; f__Rhizobiaceae	0.000321958	0.000482936	0.000160979	0.000160979	0.000442692	0.000160979	0.000120734	0.000241468	0.000241468	0.000362202	0.000281713	0.000160979	0.000160979	0.000442692	0.000402447	0.000201223	0.000362202	0.000120734	0.00201223	0.00068416	0.00140856	0.000281713	0.000281713	0.000321958	0.00068416	0.00108661	0.00060367	0.000201223	0.000442692	0.000523181	0.000201223	0.000201223	0.000241468	0.000201223	0.000442692	0.000402447	0.000281713	0.000201223	0.000160979	0.000241468	0.000241468	0.000281713	0.000321958	0.000201223	0.000160979	0.000321958
OTU_12317	0.00803566	0.208695	k__Bacteria; p__Proteobacteria; c__Alphaproteobacteria; o__Sphingomonadales; f__; g__; s__	8.04894e-05	0.000442692	8.04894e-05	0.00068416	0.0015293	0.000563426	4.02447e-05	0.000120734	0.00068416	0	0	0	0.000321958	0.000643915	0.000241468	0.000201223	0.000241468	0.000402447	0.000925628	0.000482936	0.000120734	0.000201223	8.04894e-05	0.000120734	0.00233419	0.0018915	0.00229395	0.000160979	0.00100612	0.000643915	0.000160979	0.000241468	0.000120734	0.000160979	0.000201223	4.02447e-05	0.000120734	0.000160979	0.000241468	0	0	0.000201223	0	4.02447e-05	0	0.000120734
OTU_60	0.00804674	0.208648	k__Bacteria; p__Proteobacteria; c__Betaproteobacteria; o__Burkholderiales; f__Comamonadaceae; g__; s__	0.00120734	0.00177077	0.0011671	0.000804894	0.00068416	0.000120734	0.000241468	0.000362202	0.000523181	0.000563426	0.000362202	0.000442692	0.000764649	0.00201223	0.000482936	0.000442692	0.000482936	0.000241468	0.00245493	0.0018915	0.00390373	0.000523181	0.00068416	0.000442692	0.000442692	0.00229395	0.000523181	0.00205248	0.00193175	0.00140856	0.0015293	0.00156954	0.000362202	0.00325982	0.00708307	0.0022537	0.00108661	0.000845138	0.00144881	0.000643915	0.000724404	0.000362202	0.000925628	0.000402447	8.04894e-05	0.00201223
OTU_149	0.0081394	0.208261	k__Bacteria; p__Bacteroidetes; c__Sphingobacteriia; o__Sphingobacteriales; f__; g__; s__	0.000482936	0.000281713	0.000201223	0.000845138	0.00100612	0.0011671	0.00104636	0.000965873	0.00112685	0.000724404	0.00060367	0.000804894	0.00140856	0.00169028	0.000804894	0.00100612	0.000925628	0.00148905	0	8.04894e-05	4.02447e-05	0.000160979	8.04894e-05	0.000120734	0.00060367	0.00060367	0.000804894	0.00108661	0.000724404	0.000523181	0.00108661	0.000643915	0.000724404	0.000885383	0.000442692	0.000885383	0.000482936	0.000362202	0.000160979	0.000160979	0.000241468	0.000241468	0.000241468	0.000201223	0.000362202	0.000120734
OTU_18006	0.00832704	0.207489	k__Bacteria; p__Proteobacteria; c__Betaproteobacteria; o__Methylophilales; f__Methylophilaceae; g__Methylotenera; s__mobilis	0.000160979	0.000160979	8.04894e-05	0	0.000120734	0.000160979	8.04894e-05	0.000402447	0.000321958	4.02447e-05	0.000120734	4.02447e-05	0.000160979	4.02447e-05	0.000120734	8.04894e-05	0.000241468	4.02447e-05	4.02447e-05	0	0	0.000523181	0.000321958	0.000482936	0.000120734	0.000201223	8.04894e-05	0.000120734	4.02447e-05	8.04894e-05	8.04894e-05	4.02447e-05	8.04894e-05	8.04894e-05	8.04894e-05	0	4.02447e-05	8.04894e-05	0	0	0	4.02447e-05	0	8.04894e-05	8.04894e-05	4.02447e-05
OTU_14405	0.00863665	0.206251	k__Bacteria; p__Proteobacteria; c__Betaproteobacteria; o__Burkholderiales; f__Comamonadaceae; g__Hydrogenophaga; s__	0.000321958	0.000442692	0.000281713	0.000241468	0.000362202	0.000241468	0.000241468	0.000281713	0.000120734	0.000321958	0.000201223	0.000281713	0.000442692	0.000241468	0.000160979	0.000120734	8.04894e-05	0.000241468	0.000281713	0.00100612	0.000201223	0.000201223	0.000402447	0.000402447	8.04894e-05	0.000241468	8.04894e-05	0	0.000201223	4.02447e-05	0.000321958	0.000241468	0.000241468	0.000241468	0.000281713	0.000281713	0.000241468	0.000321958	0.000482936	0.00156954	0.00136832	0.0015293	0.000402447	0.000845138	0.000482936	0.000804894
OTU_305	0.0086602	0.206158	k__Bacteria; p__Proteobacteria; c__Gammaproteobacteria; o__Legionellales; f__Coxiellaceae; g__; s__	0.000160979	0.000120734	0.000241468	0.000965873	0.00128783	0.000965873	0.000241468	0.000160979	0.000724404	0	0	4.02447e-05	0.000160979	0.000482936	0.000563426	0.000201223	0.000321958	0.000281713	8.04894e-05	0	0	0	0	0	0	0	0	0.000764649	0.000563426	0.000442692	0.000201223	0.000281713	0.000241468	0	8.04894e-05	0.000281713	8.04894e-05	0	4.02447e-05	0	0	0	0.000120734	0	4.02447e-05	4.02447e-05
OTU_477	0.00892786	0.205123	k__Bacteria; p__Proteobacteria; c__Betaproteobacteria; o__Methylophilales; f__Methylophilaceae; g__; s__	0	0	0	0	4.02447e-05	0	0	0	0	8.04894e-05	8.04894e-05	4.02447e-05	0	0	0	0	0	0	0	4.02447e-05	4.02447e-05	4.02447e-05	4.02447e-05	0.000160979	0	0	0	4.02447e-05	0	0	0	0	4.02447e-05	0	0	0	4.02447e-05	8.04894e-05	0	0	0	0	0	0	0	0
OTU_6841	0.00904237	0.20469	k__Bacteria; p__Bacteroidetes; c__Cytophagia; o__Cytophagales; f__Cyclobacteriaceae; g__; s__	0.000201223	0.000241468	0.000160979	0.000563426	0.00060367	0.000764649	0.00104636	0.00132807	0.000845138	0.00309884	0.00313909	0.00313909	0.00132807	0.000321958	0.00169028	0.00144881	0.00148905	0.00128783	4.02447e-05	0.000764649	0.000362202	0.000321958	0.000281713	0.000321958	4.02447e-05	4.02447e-05	0	0.0011671	0.000885383	0.000523181	0.00140856	0.00165003	0.00160979	0.00128783	0.000965873	0.000362202	0.000523181	0.000281713	0.000362202	0.00253542	0.00233419	0.00197199	0.000643915	0.000764649	0.000885383	0.000764649
OTU_8382	0.00907307	0.204574	k__Bacteria; p__Planctomycetes; c__Planctomycetia; o__Gemmatales; f__Gemmataceae; g__; s__	0.000402447	0.000442692	0.000643915	0.00169028	0.00169028	0.00100612	0.000442692	0.000442692	0.00112685	4.02447e-05	0	4.02447e-05	0.000563426	0.00104636	0.000965873	0.00136832	0.00177077	0.00273664	0.000362202	0.000281713	0	0	4.02447e-05	0	0.000764649	0.000241468	0.00060367	0.00144881	0.000965873	0.0015293	0.00148905	0.00160979	0.00140856	0.00140856	0.000201223	0.00160979	0.000402447	0.000442692	0.00060367	0	4.02447e-05	8.04894e-05	0.000160979	0	0	0
OTU_203	0.00921597	0.204042	k__Bacteria; p__Proteobacteria; c__Gammaproteobacteria; o__Xanthomonadales; f__Xanthomonadaceae; g__; s__	0.000160979	0.000201223	0.000160979	4.02447e-05	0.000160979	0.000120734	0.000120734	0.000160979	0.000241468	0.000965873	0.000362202	0.000523181	0.00060367	0.000925628	0.000724404	0.000120734	0.000241468	0.000321958	0.00148905	0.00148905	0.000764649	0.000362202	0.000402447	0.000482936	0.000362202	0.000764649	0.000442692	0.000321958	0.000563426	0.000804894	0.000281713	0.000120734	4.02447e-05	0.00068416	0.000523181	0.00104636	0.000120734	0.000402447	0.000160979	0.000201223	8.04894e-05	0.000201223	0.000201223	4.02447e-05	8.04894e-05	0.000362202
OTU_11192	0.00922886	0.203994	k__Bacteria; p__Proteobacteria; c__Gammaproteobacteria; o__Pseudomonadales; f__Moraxellaceae; g__Acinetobacter; s__johnsonii	0	0	0	0	4.02447e-05	0	4.02447e-05	4.02447e-05	0	4.02447e-05	0	0	4.02447e-05	0.0026159	0.000482936	0	0	0	4.02447e-05	4.02447e-05	0.00108661	0	0	0	0	0.000281713	4.02447e-05	0.000362202	0	0	4.02447e-05	4.02447e-05	0	0	4.02447e-05	8.04894e-05	4.02447e-05	0	4.02447e-05	0	0	0	8.04894e-05	0	0	0
OTU_18324	0.00936121	0.203509	k__Bacteria; p__Actinobacteria; c__Actinobacteria; o__Actinomycetales; f__ACK-M1; g__; s__	0.000482936	0.000523181	0.000482936	0.000764649	0.000442692	0.000885383	0.00112685	0.00112685	0.000925628	0.00120734	0.00160979	0.000643915	0.000965873	0.000321958	0.000965873	0.000764649	0.000563426	0.000724404	0.000321958	0.000442692	0.000442692	0.000241468	4.02447e-05	0.000120734	0.000241468	4.02447e-05	0	0.000482936	0.000482936	0.00112685	0.0011671	0.00156954	0.000845138	0.000885383	0.000764649	0.00104636	0.000482936	0.000160979	0.000160979	0.000160979	0.000321958	0.000362202	0.000160979	0.000321958	0.000120734	8.04894e-05
OTU_13944	0.00948755	0.203051	k__Bacteria; p__Proteobacteria; c__Betaproteobacteria; o__Methylophilales; f__Methylophilaceae; g__; s__	8.04894e-05	0.000120734	0.000160979	0.000160979	0.000201223	0.000241468	0.000160979	0.000241468	0.000442692	8.04894e-05	8.04894e-05	0.000120734	0.000201223	0.000201223	0.000120734	0.000120734	4.02447e-05	0.000281713	4.02447e-05	0	0	0.000523181	0.000482936	0.00128783	0.000201223	0.000160979	8.04894e-05	0.000201223	0.000120734	0.000201223	0.000402447	8.04894e-05	0.000241468	0.000362202	0.000120734	0	0.000201223	0	0.000321958	8.04894e-05	8.04894e-05	4.02447e-05	8.04894e-05	0.000120734	4.02447e-05	0.000241468
OTU_20083	0.00967082	0.202398	k__Bacteria; p__Proteobacteria; c__Betaproteobacteria; o__Burkholderiales; f__Comamonadaceae; g__Limnohabitans; s__	0.0240261	0.0316726	0.0282518	0.00869285	0.00651964	0.0072038	0.00499034	0.00442692	0.00406471	0.0433435	0.0540084	0.0396008	0.0295798	0.0109868	0.0173455	0.00289762	0.00402447	0.0079282	0.0109868	0.0202833	0.0117917	0.0481729	0.0458387	0.0652366	0.0129185	0.0105844	0.0153332	0.011027	0.0111478	0.0144881	0.0121137	0.0165406	0.0178686	0.00680135	0.0049501	0.00434643	0.00434643	0.00623793	0.0177479	0.0323165	0.026481	0.035858	0.00559401	0.00350129	0.003783	0.0502254
OTU_329	0.00971828	0.20223	k__Bacteria; p__Proteobacteria; c__Betaproteobacteria; o__Hydrogenophilales; f__Hydrogenophilaceae; g__Thiobacillus; s__	0	0	0	0.000482936	0.000804894	0.000563426	8.04894e-05	0	8.04894e-05	8.04894e-05	8.04894e-05	8.04894e-05	0.0011671	0.000362202	0.000402447	0.000160979	0.000120734	0.000160979	0	0	0	0.000362202	0.000201223	0.000160979	8.04894e-05	8.04894e-05	8.04894e-05	8.04894e-05	0.000402447	0.000241468	0.000241468	0.000241468	0.000442692	0.000120734	8.04894e-05	0.000241468	0	0.000241468	4.02447e-05	0	4.02447e-05	0.000120734	0	4.02447e-05	0	4.02447e-05
OTU_138	0.00973608	0.202168	k__Bacteria; p__Bacteroidetes; c__Sphingobacteriia; o__Sphingobacteriales; f__; g__; s__	0.00112685	0.000724404	0.000643915	0.000764649	0.00068416	0.000804894	0.000764649	0.00128783	0.0011671	0	0	0	0.00112685	0.000482936	0.00100612	0.00128783	0.00128783	0.0011671	4.02447e-05	0.000160979	8.04894e-05	4.02447e-05	4.02447e-05	0	0	0	0	0.000764649	0.000442692	0.000482936	0.00169028	0.00108661	0.000764649	0.00060367	0.000321958	0.00068416	0.00177077	0.00132807	0.00156954	0.00108661	0.00201223	0.00140856	0.00104636	0.00128783	0.00120734	0.000482936
OTU_6039	0.00982602	0.201853	k__Bacteria; p__Proteobacteria; c__Betaproteobacteria; o__Burkholderiales; f__Comamonadaceae; g__Comamonas; s__	0.000724404	0.0011671	0.00068416	0.00108661	0.00104636	0.000885383	0.000201223	0.000201223	0.000120734	0.00108661	0.000523181	0.000804894	0.000885383	0.00297811	0.000885383	0.000321958	0.000362202	0.000201223	0.00454765	0.00241468	0.00619768	0.000321958	0.000321958	0.000362202	0.00128783	0.00108661	0.00068416	0.00060367	0.00124759	0.000643915	0.000362202	0.000482936	0.000442692	0.000724404	0.000442692	0.000321958	8.04894e-05	0.000442692	0.000362202	0.000804894	0.000563426	0.000442692	0.000402447	8.04894e-05	0	0.00128783
OTU_1781	0.00989995	0.201597	k__Bacteria; p__Proteobacteria; c__Alphaproteobacteria; o__Rhodobacterales; f__Rhodobacteraceae; g__Rhodobacter; s__	0.00217321	0.00301835	0.00253542	0.00112685	0.00197199	0.000965873	0.000402447	0.000724404	0.000563426	0.00313909	0.00136832	0.00289762	0.00185126	0.00237444	0.00144881	0.00068416	0.00112685	0.000845138	0.0145283	0.0056745	0.00788796	0.00185126	0.00249517	0.00156954	0.00941726	0.0094575	0.0103026	0.00140856	0.00446716	0.00257566	0.0011671	0.00112685	0.00169028	0.0018915	0.00438667	0.00100612	0.000845138	0.000845138	0.00144881	0.000482936	0.000563426	0.000563426	0.00185126	0.000321958	0.000402447	0.00124759
OTU_5525	0.00995876	0.201394	k__Bacteria; p__Verrucomicrobia; c__Opitutae; o__[Cerasicoccales]; f__[Cerasicoccaceae]; g__; s__	0.000442692	0.00060367	0.000442692	0.000362202	0.000120734	0.000160979	0.000241468	0.000241468	0.000241468	0	0	4.02447e-05	8.04894e-05	0	0.000241468	0.000241468	0.000201223	8.04894e-05	8.04894e-05	8.04894e-05	4.02447e-05	0.0018915	0.00124759	0.0011671	4.02447e-05	0	0	4.02447e-05	8.04894e-05	4.02447e-05	0.000201223	0.000160979	0	0.000523181	0.00068416	0.000442692	0	8.04894e-05	0	0.000120734	0.000160979	8.04894e-05	8.04894e-05	0.000120734	0.000201223	0
OTU_13165	0.00998104	0.201318	k__Bacteria; p__Proteobacteria; c__Alphaproteobacteria; o__Sphingomonadales; f__; g__; s__	0.000160979	8.04894e-05	0.000160979	0.000362202	0.00068416	0.000442692	0.000160979	0.000241468	0.000281713	4.02447e-05	4.02447e-05	4.02447e-05	0.000321958	0.000321958	0.000160979	0.000160979	0.000321958	0.000321958	0.00273664	0.00229395	0.000925628	0.000281713	0	0.000201223	0.00112685	0.0034208	0.00112685	0.000321958	0.000764649	0.00060367	0.000120734	0.000402447	0.000120734	0.000281713	0.000643915	4.02447e-05	8.04894e-05	0.000160979	0.000321958	4.02447e-05	4.02447e-05	4.02447e-05	0.000120734	4.02447e-05	0.000160979	0
OTU_91	0.0100298	0.201151	k__Bacteria; p__Proteobacteria; c__Alphaproteobacteria; o__Rhizobiales; f__Xanthobacteraceae; g__; s__	0.0011671	0.00160979	0.00104636	0.0011671	0.00160979	0.000925628	0.00136832	0.000885383	0.00100612	0.00112685	0.00108661	0.000764649	0.00132807	0.00169028	0.00112685	0.000965873	0.000965873	0.00108661	0.00185126	0.00185126	0.00144881	0.00104636	0.000925628	0.000885383	0.00201223	0.00148905	0.00205248	0.00112685	0.00104636	0.00120734	0.000965873	0.00112685	0.00100612	0.000845138	0.00112685	0.00108661	0.00136832	0.00100612	0.00156954	0.000885383	0.00112685	0.000764649	0.0011671	0.00104636	0.000885383	0.000965873
OTU_53	0.0101906	0.200606	k__Bacteria; p__Proteobacteria; c__Betaproteobacteria; o__Methylophilales; f__Methylophilaceae; g__Methylotenera; s__mobilis	0.000442692	0.000160979	4.02447e-05	8.04894e-05	8.04894e-05	4.02447e-05	0.000120734	0.000281713	0.000402447	0.000201223	0.000160979	0.000201223	0.000120734	0.000120734	0.000201223	0.000362202	0.000321958	0.000120734	0.000160979	4.02447e-05	8.04894e-05	0.000402447	0.000321958	0.000724404	0	0.000160979	0.000201223	0.000201223	4.02447e-05	0.000120734	0.000241468	0.000160979	0.000201223	4.02447e-05	0.000160979	0.000120734	0.000241468	0.000120734	0.000201223	8.04894e-05	0.000120734	8.04894e-05	0	8.04894e-05	0	0.000160979
OTU_2448	0.0102755	0.200322	k__Bacteria; p__Actinobacteria; c__Actinobacteria; o__Actinomycetales; f__Microbacteriaceae; g__Clavibacter; s__	0	0.000120734	8.04894e-05	8.04894e-05	4.02447e-05	0	4.02447e-05	4.02447e-05	0	0.000442692	0.000643915	0.000321958	4.02447e-05	8.04894e-05	0.000160979	0.000120734	8.04894e-05	8.04894e-05	4.02447e-05	8.04894e-05	0	0.000965873	0.00108661	0.00128783	0.00068416	0.000724404	0.000804894	4.02447e-05	0.000120734	4.02447e-05	0	0.000160979	8.04894e-05	0	4.02447e-05	0	4.02447e-05	4.02447e-05	4.02447e-05	0	0	0	8.04894e-05	4.02447e-05	0	0.000201223
OTU_14448	0.0114295	0.196661	k__Bacteria; p__Proteobacteria; c__Betaproteobacteria; o__Burkholderiales; f__Comamonadaceae; g__Limnohabitans; s__	0.0467643	0.0459997	0.0393995	0.0123551	0.0094575	0.00921603	0.00639891	0.00635866	0.00587572	0.0732051	0.0682952	0.058717	0.0423777	0.0174259	0.0274469	0.0056745	0.00595621	0.011027	0.0152125	0.0258773	0.0183918	0.0738892	0.0711929	0.0764649	0.0232212	0.0204041	0.0211687	0.0156954	0.0175064	0.0229395	0.019237	0.0257164	0.0235029	0.0109063	0.0079282	0.00712331	0.00857212	0.00969897	0.024831	0.0434643	0.0408886	0.0449936	0.00700258	0.00297811	0.00390373	0.070227
OTU_12	0.0118203	0.1955	k__Bacteria; p__[Thermi]; c__Deinococci; o__Deinococcales; f__Deinococcaceae; g__Deinococcus; s__	0.00112685	0.0015293	0.00160979	0.00100612	0.00193175	0.000845138	0.00144881	0.000885383	0.00144881	0.00165003	0.00104636	0.00132807	0.00241468	0.0146491	0.00334031	0.00100612	0.00173052	0.00293786	0.0501449	0.0210882	0.0125161	0.00173052	0.0018915	0.00108661	0.00571475	0.04769	0.00623793	0.00953799	0.0147296	0.00853187	0.00128783	0.00112685	0.00482936	0.00559401	0.0143674	0.00285737	0.0332019	0.0428606	0.0203638	0.00144881	0.00221346	0.000965873	0.00716355	0.00128783	0.000764649	0.00229395
OTU_98	0.0118363	0.195453	k__Bacteria; p__Proteobacteria; c__Betaproteobacteria; o__Burkholderiales; f__Comamonadaceae; g__; s__	0.00124759	0.000281713	0.000643915	0.000321958	0.000362202	0.000160979	4.02447e-05	4.02447e-05	4.02447e-05	0.000201223	0.000362202	0.000402447	0.000321958	0.000241468	0.000281713	4.02447e-05	8.04894e-05	0.000201223	0.00450741	0.00201223	0.0049501	0.000482936	0.000442692	0.000120734	0.000281713	0.00124759	0.000201223	0.000321958	0.000925628	0.000281713	0.000241468	0.000442692	8.04894e-05	0.000442692	0.00120734	4.02447e-05	0.000201223	0.000160979	0.000321958	0.000321958	0.00060367	0.00060367	0.000160979	4.02447e-05	0	0.00205248
OTU_12922	0.0120863	0.19473	k__Bacteria; p__Actinobacteria; c__Actinobacteria; o__Actinomycetales; f__ACK-M1; g__; s__	0.00627817	0.00881359	0.00885383	0.00712331	0.00454765	0.00575499	0.0127576	0.0127978	0.00627817	0.000160979	0.000643915	0.000281713	0.00933677	0.00237444	0.00668062	0.00965873	0.00627817	0.00651964	0.000442692	0.00173052	0.00060367	0.00177077	0.0015293	0.00201223	4.02447e-05	8.04894e-05	0.000241468	0.00595621	0.0049501	0.00470863	0.0116307	0.01151	0.00732453	0.00998068	0.015132	0.0137637	0.0113892	0.0098197	0.00949775	0.0108661	0.00869285	0.0136027	0.00841114	0.0197601	0.0173052	0.00511108
OTU_30	0.0124908	0.19359	k__Bacteria; p__Firmicutes; c__Bacilli; o__Bacillales; f__[Exiguobacteraceae]; g__Exiguobacterium; s__	0.00060367	0.00173052	0.00446716	0.000764649	0.00213297	0.000402447	0.00165003	0.000321958	0.00233419	0.0022537	0.000362202	0.00068416	0.00249517	0.000804894	0.0011671	0.000362202	0.000925628	0.00249517	0.000764649	0.000764649	0.000563426	0.000845138	0.000925628	0.000845138	0.0087331	0.00229395	0.0310689	0.00744527	0.0135222	0.047207	0.000281713	0.000321958	0.000321958	0.000764649	0.000643915	0.00124759	0.0018915	0.00197199	0.000925628	0.000321958	0.00060367	0.000281713	0.00185126	0.000643915	0.000523181	0.00209272
OTU_1	0.0124974	0.193571	k__Bacteria; p__Proteobacteria; c__Betaproteobacteria; o__Burkholderiales; f__Comamonadaceae	0.00100612	0.00108661	0.00104636	0.000402447	0.000321958	0.000442692	0	0.000160979	0.000402447	0.00124759	0.00132807	0.00108661	0.000965873	0.000442692	0.000402447	0.000160979	0.000321958	0.000201223	0.000402447	0.00100612	0.000764649	0.00156954	0.00120734	0.00136832	0.00060367	0.00100612	0.000321958	0.000281713	0.000442692	0.000442692	0.000643915	0.00100612	0.000362202	0.000281713	0.000160979	0.000120734	0.000362202	0.000281713	0.000724404	0.000925628	0.000724404	0.000885383	8.04894e-05	0	0	0.00112685
OTU_20279	0.012577	0.193351	k__Bacteria; p__Bacteroidetes; c__Cytophagia; o__Cytophagales; f__Cyclobacteriaceae; g__; s__	0.000482936	0.000281713	0.000442692	0.000321958	0.000241468	0.000362202	0.000321958	0.000402447	0.000402447	0.000402447	0.00068416	0.000563426	0.000362202	0	0.000402447	0.000523181	0.000764649	0.000482936	0	4.02447e-05	4.02447e-05	0.000201223	8.04894e-05	4.02447e-05	4.02447e-05	4.02447e-05	4.02447e-05	0.000281713	0.000201223	0.000201223	0.000362202	0.00060367	0.000724404	0.000362202	0.000362202	0.000241468	0.000160979	0.000321958	0.000160979	0.000845138	0.0011671	0.000724404	0.000160979	0.000362202	0.000201223	0.000160979
OTU_6155	0.0125773	0.19335	k__Bacteria; p__Firmicutes; c__Bacilli; o__Bacillales; f__[Exiguobacteraceae]; g__; s__	0.000764649	0.00104636	0.000965873	0.00136832	0.00229395	0.000845138	0.00104636	0.000563426	0.000845138	0.00853187	0.00108661	0.00406471	0.0114295	0.00132807	0.00144881	0.000965873	0.000965873	0.00104636	0.000523181	0.000965873	0.00104636	0.0015293	0.00245493	0.00108661	0.00547328	0.00160979	0.0144076	0.00350129	0.00454765	0.0107051	0.000523181	0.000442692	0.000442692	0.000965873	0.00100612	0.000724404	0.000563426	0.000362202	0.000845138	0.00060367	0.000402447	0.00060367	0.00128783	0.000643915	0.000482936	0.00124759
OTU_6892	0.0127159	0.19297	k__Bacteria; p__Planctomycetes; c__Planctomycetia; o__Gemmatales; f__Gemmataceae; g__; s__	0.000965873	0.00144881	0.00108661	0.00120734	0.00104636	0.00104636	0.000281713	0.000925628	0.00108661	0	0	4.02447e-05	0.000643915	0.00148905	0.000402447	0.00104636	0.00120734	0.00156954	0.000201223	0.000160979	0	8.04894e-05	4.02447e-05	4.02447e-05	4.02447e-05	4.02447e-05	0	0.00068416	0.000804894	0.00136832	0.0011671	0.000885383	0.000724404	0.00132807	0.000281713	0.000885383	0.000402447	0.000523181	0.000523181	4.02447e-05	4.02447e-05	8.04894e-05	0.000442692	0.000120734	0.000241468	4.02447e-05
OTU_55	0.0128657	0.192564	k__Bacteria; p__Proteobacteria; c__Betaproteobacteria; o__Burkholderiales; f__Oxalobacteraceae; g__Janthinobacterium; s__	0.00068416	0.000845138	0.00068416	0.000764649	0.00136832	0.000402447	0.00060367	0.00060367	0.00112685	0.000643915	0.000925628	0.000764649	0.000442692	0.00156954	0.000523181	0.000402447	0.000724404	0.00100612	0.00293786	0.00394398	0.00217321	0.00120734	0.00169028	0.000925628	0.00462814	0.00499034	0.00410496	0.00350129	0.00551352	0.00346104	0.000563426	0.00068416	0.000925628	0.00104636	0.00108661	0.00128783	0.00503059	0.00434643	0.00289762	0.000563426	0.000563426	0.000724404	0.000724404	0.00060367	0.000241468	0.0011671
OTU_14938	0.0130529	0.192062	k__Bacteria; p__Proteobacteria; c__Betaproteobacteria; o__Burkholderiales; f__Comamonadaceae; g__Acidovorax; s__	0.0011671	0.00249517	0.00100612	0.00128783	0.00144881	0.00140856	0.000442692	0.000482936	0.00068416	0.00354153	0.00446716	0.00454765	0.00160979	0.00209272	0.00185126	0.000563426	0.000321958	0.000925628	0.00281713	0.00410496	0.00297811	0.00221346	0.0018915	0.00201223	0.000643915	0.00128783	0.000482936	0.00132807	0.00148905	0.000965873	0.000845138	0.00140856	0.00128783	0.000885383	0.000925628	0.000643915	0.00068416	0.000523181	0.000885383	0.00112685	0.00108661	0.00144881	0.000764649	0.000362202	0.000241468	0.00233419
OTU_20196	0.0130635	0.192033	k__Bacteria; p__Bacteroidetes; c__[Saprospirae]; o__[Saprospirales]; f__Chitinophagaceae; g__Sediminibacterium; s__	0.0100612	0.0101819	0.00833065	0.0120734	0.00973921	0.0105441	0.0158162	0.0140052	0.01481	0.00655988	0.00700258	0.00579524	0.0115905	0.0068416	0.0137234	0.0165808	0.012999	0.015454	0.00144881	0.00547328	0.00386349	0.00607695	0.00539279	0.00430618	0.00148905	0.00221346	0.00140856	0.0111075	0.00941726	0.0114295	0.016943	0.0203236	0.0191162	0.0168625	0.0136832	0.017104	0.00366227	0.00309884	0.00330006	0.00627817	0.00579524	0.00470863	0.00402447	0.00591597	0.00430618	0.0026159
OTU_191	0.0132558	0.191525	k__Bacteria; p__Proteobacteria; c__Alphaproteobacteria; o__Sphingomonadales; f__Sphingomonadaceae; g__; s__	0.000201223	0.000241468	0.000120734	8.04894e-05	0.000362202	4.02447e-05	4.02447e-05	8.04894e-05	0.000120734	0	4.02447e-05	4.02447e-05	0	0.000281713	0.000201223	0.000120734	0.000160979	0.000160979	0.000764649	0.0011671	0.000643915	0	4.02447e-05	0.000120734	0.00108661	0.00277688	0.000724404	0.000241468	0.000201223	0.000120734	4.02447e-05	8.04894e-05	0.000321958	0.000442692	0.00100612	0	0.000281713	0.00068416	0.000281713	4.02447e-05	0.0015293	0.000281713	0.000442692	4.02447e-05	0	0.000563426
OTU_43	0.0133128	0.191376	k__Bacteria; p__Proteobacteria; c__Betaproteobacteria; o__Burkholderiales; f__Comamonadaceae	0.00132807	0.00120734	0.00124759	0.00128783	0.000965873	0.000965873	0.000925628	0.00060367	0.000643915	0.00132807	0.00124759	0.00140856	0.00124759	0.00148905	0.00156954	0.000845138	0.0011671	0.000845138	0.00205248	0.00177077	0.0022537	0.00108661	0.00136832	0.0011671	0.00136832	0.00156954	0.00104636	0.00124759	0.00136832	0.00148905	0.000764649	0.00100612	0.00120734	0.000845138	0.00185126	0.00112685	0.00120734	0.00140856	0.00108661	0.00120734	0.00136832	0.00140856	0.00108661	0.000885383	0.000764649	0.00253542
OTU_1351	0.0134185	0.1911	k__Bacteria; p__Bacteroidetes; c__Sphingobacteriia; o__Sphingobacteriales; f__; g__; s__	0.00060367	0.000160979	0.00068416	0.000724404	0.000402447	0.000523181	0.000523181	0.00060367	0.00124759	0.000965873	0.0011671	0.00156954	0.000442692	0.000563426	0.000643915	0.000845138	0.000885383	0.00128783	0.000120734	0.000643915	0.000281713	0.000281713	0.000160979	0.000241468	4.02447e-05	4.02447e-05	0.000120734	0.000241468	0.000241468	0.000160979	0.00120734	0.000643915	0.00060367	0.000563426	0.00060367	0.000764649	0.000321958	0.000362202	0.000442692	0.00068416	0.000643915	0.000563426	0.00177077	0.00140856	0.00173052	0.000523181
OTU_19681	0.0139799	0.189672	k__Bacteria; p__Bacteroidetes; c__Flavobacteriia; o__Flavobacteriales; f__Cryomorphaceae; g__Fluviicola; s__	8.04894e-05	0	0	4.02447e-05	4.02447e-05	4.02447e-05	4.02447e-05	0	0	0	0	0	4.02447e-05	4.02447e-05	4.02447e-05	0	4.02447e-05	0.000160979	0	8.04894e-05	8.04894e-05	0.00160979	0.0018915	0.0022537	4.02447e-05	0	4.02447e-05	4.02447e-05	0	0.000241468	4.02447e-05	0.000241468	4.02447e-05	0.000160979	8.04894e-05	8.04894e-05	0	0	4.02447e-05	0.000362202	0.000523181	0.000523181	0.000724404	0.000643915	0.00160979	0.000845138
OTU_10994	0.0143942	0.188652	k__Bacteria; p__Actinobacteria; c__Actinobacteria; o__Actinomycetales; f__ACK-M1; g__; s__	0.000241468	0.000442692	0.000160979	0.00108661	0.000643915	0.000563426	0.00112685	0.00100612	0.000523181	0.000925628	0.00132807	0.000563426	0.000845138	0	0.000160979	0.000643915	0.000643915	0.000442692	0.000160979	0.000160979	0.000160979	0.000160979	0	8.04894e-05	0	0	8.04894e-05	0.000402447	0.000201223	0.000563426	0.000643915	0.00100612	0.000523181	0.000764649	0.00068416	0.000804894	0.000201223	0.000120734	0.000362202	0.000482936	0.000482936	0.000362202	0.000160979	0.00104636	0.000402447	0.000201223
OTU_7441	0.014561	0.188249	k__Bacteria; p__Actinobacteria; c__Actinobacteria; o__Actinomycetales; f__ACK-M1; g__; s__	8.04894e-05	0.000362202	0.000201223	0.000241468	0.000402447	0.000241468	0.000321958	0.000523181	4.02447e-05	0.000845138	0.00112685	0.000925628	0.000201223	8.04894e-05	0.000160979	0.000362202	0.000201223	0.000241468	0	0.000201223	0	4.02447e-05	0	8.04894e-05	8.04894e-05	0	4.02447e-05	0.000241468	8.04894e-05	0.000120734	0.000321958	0.00068416	0.000482936	0.00068416	0.000241468	0.00060367	4.02447e-05	4.02447e-05	8.04894e-05	0.000201223	0.000120734	0.000160979	0.000201223	0.000764649	0.000241468	0.000201223
OTU_95	0.0145769	0.18821	k__Bacteria; p__Bacteroidetes; c__Bacteroidia; o__Bacteroidales; f__S24-7; g__; s__	0.000804894	0.00112685	0.000563426	0.00108661	0.000885383	0.00104636	0.00108661	0.0011671	0.00132807	0.000845138	0.000965873	0.000965873	0.000764649	0.000885383	0.000925628	0.00104636	0.00128783	0.000804894	0.000362202	0.000885383	0.000362202	0.00144881	0.000965873	0.00108661	0.00128783	0.00068416	0.00068416	0.000804894	0.00104636	0.000563426	0.000724404	0.000845138	0.00108661	0.00068416	0.00112685	0.00100612	0.000764649	0.00060367	0.000563426	0.00104636	0.00104636	0.00108661	0.0011671	0.000965873	0.00100612	0.000925628
OTU_244	0.0146718	0.187983	k__Bacteria; p__Bacteroidetes; c__[Saprospirae]; o__[Saprospirales]; f__Chitinophagaceae; g__; s__	0.000845138	0.000563426	0.000965873	0.000321958	0.000523181	0.000321958	0.000160979	8.04894e-05	0.00060367	0.000362202	4.02447e-05	0.000120734	0.000321958	0.000321958	0.000281713	8.04894e-05	0.000241468	0.000321958	0.000160979	0.000201223	4.02447e-05	0.000160979	4.02447e-05	0.000201223	0.0015293	0.000724404	0.00217321	0.000321958	0.000563426	0.000523181	4.02447e-05	0.000201223	0.000201223	0.000201223	0.000241468	0.000160979	0	0	8.04894e-05	8.04894e-05	0	0	0	0	4.02447e-05	4.02447e-05
OTU_15301	0.0148021	0.187674	k__Bacteria; p__Proteobacteria; c__Betaproteobacteria; o__Burkholderiales; f__Comamonadaceae; g__Limnohabitans; s__	0.00160979	0.00104636	0.00140856	0.000321958	0.000402447	0.000442692	0.000160979	0.000120734	0.000120734	0.00185126	0.00273664	0.00185126	0.0011671	0.000321958	0.000845138	0.000120734	0.000241468	0.000523181	0.000523181	0.000965873	0.000764649	0.00197199	0.00193175	0.00233419	0.000845138	0.00060367	0.000643915	0.000563426	0.000804894	0.00100612	0.00068416	0.00060367	0.000724404	0.000442692	0.000281713	0.000241468	0.000281713	0.000201223	0.000402447	0.00165003	0.00108661	0.00136832	0.000241468	0.000120734	4.02447e-05	0.00265615
OTU_106	0.0152965	0.186522	k__Bacteria; p__Bacteroidetes; c__Cytophagia; o__Cytophagales; f__Cytophagaceae; g__; s__	0.000885383	0.000362202	0.000724404	0.000885383	0.000764649	0.000482936	0.000523181	0.000845138	0.000724404	0.000643915	0.000845138	0.00100612	0.000523181	0.000523181	0.00108661	0.000845138	0.000724404	0.00060367	0.000281713	0.000402447	0.000321958	0.000523181	0.000885383	0.000764649	0.000442692	0.000281713	0.000241468	0.000281713	0.00068416	0.000724404	0.00068416	0.000885383	0.00068416	0.00060367	0.000764649	0.000764649	0.000482936	0.000482936	0.000402447	0.000362202	0.00104636	0.000724404	0.000442692	0.00068416	0.00068416	0.000523181
OTU_408	0.0155752	0.185888	k__Bacteria; p__Proteobacteria; c__Gammaproteobacteria; o__Pseudomonadales; f__Moraxellaceae; g__Perlucidibaca; s__	0	4.02447e-05	4.02447e-05	0.000201223	0	8.04894e-05	0	0	4.02447e-05	0	0	0	8.04894e-05	4.02447e-05	0.000120734	0	0	8.04894e-05	0	0	0	0	0	0	0.000160979	8.04894e-05	8.04894e-05	0.00132807	0.000281713	0.000201223	0.000241468	0.000160979	0.000120734	0.000442692	0.000241468	0.000120734	8.04894e-05	0.000160979	0.000523181	0	0	0	0	0	4.02447e-05	0
OTU_153	0.0160736	0.184781	k__Bacteria; p__Proteobacteria; c__Gammaproteobacteria; o__Alteromonadales; f__[Chromatiaceae]; g__Rheinheimera; s__	0.00221346	0.00148905	0.000442692	0.000241468	0.000120734	0	0.000160979	4.02447e-05	0.000120734	0.000845138	0.000563426	0.000845138	0.000321958	0.000643915	0.000845138	4.02447e-05	8.04894e-05	0.000201223	0.000362202	0.000482936	0.000523181	0.000120734	8.04894e-05	0.000120734	0	0.000402447	8.04894e-05	0.00374276	8.04894e-05	0.000160979	0.000241468	0.000201223	0.000201223	0.000724404	0.000201223	0.000643915	0.0015293	0.00169028	0.00205248	0.000160979	0.00068416	0.000563426	0.000563426	0.000442692	0.000442692	0.000241468
OTU_9243	0.0174356	0.181912	k__Bacteria; p__Proteobacteria; c__Betaproteobacteria; o__Burkholderiales; f__Comamonadaceae	0.000563426	0.000563426	0.000523181	0.000281713	0.000201223	0.000160979	0.000201223	0.000281713	0.000201223	0.000241468	0.000442692	0.000321958	0.000442692	0.000120734	0.000482936	0.000120734	0.000201223	0.000160979	0.000201223	0.00060367	0.000482936	0.000643915	0.000442692	0.000482936	4.02447e-05	0.000160979	0.000201223	0.000241468	0.000160979	0.000160979	8.04894e-05	0.000241468	0.000402447	0.000281713	0.00060367	0.000321958	8.04894e-05	8.04894e-05	8.04894e-05	0.000563426	0.000402447	0.000402447	4.02447e-05	8.04894e-05	8.04894e-05	0.00144881
OTU_5651	0.0175488	0.181683	k__Bacteria; p__Verrucomicrobia; c__Opitutae; o__[Cerasicoccales]; f__[Cerasicoccaceae]; g__; s__	0.000281713	0.000120734	0.000120734	0	4.02447e-05	0.000160979	0.000160979	0.000201223	8.04894e-05	0	0	4.02447e-05	4.02447e-05	4.02447e-05	4.02447e-05	0.000160979	0.000442692	8.04894e-05	0	4.02447e-05	0	0.000845138	0.000724404	0.000764649	0	0	4.02447e-05	8.04894e-05	4.02447e-05	0	0.000120734	4.02447e-05	4.02447e-05	0.000281713	0.000402447	0.000362202	8.04894e-05	8.04894e-05	8.04894e-05	8.04894e-05	8.04894e-05	0.000160979	8.04894e-05	4.02447e-05	0.000241468	0.000120734
OTU_31	0.0176068	0.181566	k__Bacteria; p__Actinobacteria; c__Actinobacteria; o__Actinomycetales; f__; g__; s__	0.00325982	0.00865261	0.00764649	0.00833065	0.0127576	0.00933677	0.00599646	0.00523181	0.0109868	0.00249517	0.00205248	0.00229395	0.00804894	0.0105844	0.0104234	0.00732453	0.00676111	0.00523181	0.00233419	0.00249517	0.000804894	0.0022537	0.00253542	0.00201223	0.00233419	0.00156954	0.00217321	0.00631842	0.011349	0.00820992	0.00776722	0.00861236	0.00587572	0.00519156	0.00643915	0.00655988	0.00655988	0.00563426	0.00442692	0.00615744	0.00301835	0.00599646	0.00511108	0.00712331	0.00579524	0.00309884
OTU_81	0.0176983	0.181383	k__Bacteria; p__Proteobacteria; c__Betaproteobacteria; o__Rhodocyclales; f__Rhodocyclaceae; g__Azovibrio; s__	0.000362202	0.000845138	0.000523181	0.0015293	0.00209272	0.00124759	0.000321958	0.00068416	0.000563426	0.000362202	0.000362202	0.000362202	0.000563426	0.000925628	0.00136832	0.000402447	0.000764649	0.000804894	0.000362202	0.00068416	0.000442692	0.000845138	0.00124759	0.00060367	0.00442692	0.00470863	0.00422569	0.00132807	0.00490985	0.00245493	0.000965873	0.000845138	0.000160979	0.00177077	0.00165003	0.000563426	0.00060367	0.000402447	0.00148905	0.000160979	0.000201223	0.000241468	4.02447e-05	0.000120734	0	0.000885383
OTU_132	0.0179706	0.180842	k__Bacteria; p__Bacteroidetes; c__Flavobacteriia; o__Flavobacteriales; f__; g__; s__	0.000764649	0.000563426	0.000321958	0.00128783	0.00156954	0.00213297	0.00185126	0.00213297	0.00289762	4.02447e-05	0.000120734	4.02447e-05	0.00233419	0.00108661	0.00257566	0.00237444	0.00325982	0.00325982	8.04894e-05	0.000281713	0.000120734	0	4.02447e-05	4.02447e-05	0	0.000120734	8.04894e-05	0.00181101	0.00104636	0.000764649	0.00160979	0.00068416	0.000523181	0.00104636	0.000402447	0.00108661	8.04894e-05	8.04894e-05	0.000120734	4.02447e-05	0	4.02447e-05	0	4.02447e-05	8.04894e-05	0
OTU_20100	0.0184184	0.17997	k__Bacteria; p__Bacteroidetes; c__Flavobacteriia; o__Flavobacteriales; f__Cryomorphaceae; g__Fluviicola; s__	8.04894e-05	4.02447e-05	4.02447e-05	4.02447e-05	8.04894e-05	4.02447e-05	0	0	8.04894e-05	0.000241468	0.000201223	0.000120734	0	4.02447e-05	8.04894e-05	0.000120734	0.000120734	4.02447e-05	0	8.04894e-05	0	0.0030586	0.0030586	0.00253542	0.000120734	0.000160979	0.000160979	0	4.02447e-05	4.02447e-05	0.000201223	0.000201223	4.02447e-05	8.04894e-05	0	4.02447e-05	8.04894e-05	0	0	4.02447e-05	0	0	0.000120734	0	0	0
OTU_13672	0.0189932	0.178878	k__Bacteria; p__Proteobacteria; c__Betaproteobacteria; o__Methylophilales; f__Methylophilaceae; g__; s__	0	0	0	0	4.02447e-05	0	0	0	4.02447e-05	0	0	4.02447e-05	0	0	0	0	0	0	0	4.02447e-05	0	0	4.02447e-05	0	0	0	0	0	4.02447e-05	0	0	8.04894e-05	0	0	0	0	0	0	0	0	0	0	0	0	0	4.02447e-05
OTU_16896	0.0190018	0.178862	k__Bacteria; p__Proteobacteria; c__Betaproteobacteria; o__Burkholderiales; f__Comamonadaceae; g__Variovorax; s__	0.00354153	0.00237444	0.00253542	0.000965873	0.00120734	0.00108661	0.00132807	0.000965873	0.00100612	0.00173052	0.00217321	0.0018915	0.0018915	0.00173052	0.0022537	0.000845138	0.00104636	0.000724404	0.0015293	0.00442692	0.00297811	0.0018915	0.00144881	0.00173052	0.000482936	8.04894e-05	0.000281713	0.00112685	0.00124759	0.00104636	0.00144881	0.00156954	0.00140856	0.000804894	0.00068416	0.000925628	0.000201223	0.000523181	0.000925628	0.000442692	0.000724404	0.000442692	0.000160979	0.000120734	0.000201223	0.00140856
OTU_20088	0.0190548	0.178763	k__Bacteria; p__Proteobacteria; c__Betaproteobacteria; o__Burkholderiales; f__Oxalobacteraceae; g__; s__	0.00474887	0.00257566	0.00366227	0.000925628	0.00068416	0.000482936	0.00273664	0.00144881	0.0022537	0.000281713	0.000281713	0.000321958	0.00237444	0.00104636	0.00253542	0.00068416	0.000241468	0.000523181	0.00398422	0.00668062	0.003783	0.000241468	0.000120734	0.000120734	0.00269639	0.00140856	0.00253542	0.000885383	0.00132807	0.000764649	0.000321958	0.00068416	0.000442692	0.000442692	0.0018915	0.000804894	0.000724404	0.00112685	0.00112685	0.00301835	0.000321958	0.000724404	0.000563426	0.000764649	0.00068416	0.000643915
OTU_435	0.0193105	0.178289	k__Bacteria; p__Proteobacteria; c__Gammaproteobacteria; o__Oceanospirillales; f__Halomonadaceae; g__; s__	0	4.02447e-05	0	0	4.02447e-05	0	0	0	4.02447e-05	0	0	0	0	0	0	0	0	0	0	0	0	0	4.02447e-05	0.000160979	0	0	0	0	0	4.02447e-05	0	0	0	0	0	0	0	0	0	0	0	0	0	0	0	0
OTU_10849	0.0193141	0.178283	k__Bacteria; p__Actinobacteria; c__Actinobacteria; o__Actinomycetales; f__ACK-M1; g__; s__	0.000482936	0.00104636	0.000764649	0.00068416	0.000523181	0.00060367	0.00136832	0.00156954	0.000764649	0.000120734	8.04894e-05	0.000120734	0.000845138	0.000281713	0.000442692	0.00108661	0.000523181	0.000523181	4.02447e-05	0.000201223	0.000160979	0.000241468	0.000402447	0.000241468	8.04894e-05	8.04894e-05	8.04894e-05	0.000764649	0.000402447	0.000281713	0.00100612	0.00128783	0.000804894	0.00148905	0.00165003	0.00136832	0.00104636	0.00104636	0.00068416	0.0011671	0.000845138	0.00156954	0.000925628	0.00193175	0.00185126	0.00060367
OTU_108	0.0197579	0.177474	k__Bacteria; p__Actinobacteria; c__Acidimicrobiia; o__Acidimicrobiales; f__C111; g__; s__	0.000241468	0.00068416	0.00104636	0.00148905	0.0015293	0.00173052	0.000764649	0.00104636	0.00205248	4.02447e-05	4.02447e-05	0.000201223	0.000442692	0.00156954	0.0011671	0.00173052	0.00173052	0.00144881	0.000362202	0.000643915	0.000241468	0.000281713	0.00068416	0.000362202	4.02447e-05	4.02447e-05	0	0.00148905	0.0018915	0.00205248	0.00173052	0.00120734	0.00173052	0.00169028	0.00100612	0.00205248	0.000321958	0.000482936	0.000281713	4.02447e-05	8.04894e-05	0.000201223	0.000281713	0.000362202	0.000321958	0.000120734
OTU_83	0.0199094	0.177202	k__Bacteria; p__Actinobacteria; c__Actinobacteria; o__Actinomycetales; f__ACK-M1; g__; s__	0.00108661	0.00156954	0.00124759	0.00201223	0.00100612	0.00173052	0.00257566	0.00273664	0.00156954	0.000523181	0.000362202	0.000523181	0.0018915	0.000724404	0.00173052	0.00334031	0.00289762	0.00201223	8.04894e-05	0.000160979	0.000241468	0.000281713	0.000201223	0.000281713	8.04894e-05	0.000160979	0.000321958	0.0022537	0.00201223	0.00362202	0.0030586	0.0030586	0.00205248	0.00237444	0.00297811	0.00269639	0.000160979	0.000120734	0.000241468	0.000241468	0.000201223	0.000281713	4.02447e-05	0.000402447	0.000120734	0.000160979
OTU_166	0.0208162	0.175612	k__Bacteria; p__Planctomycetes; c__Planctomycetia; o__Planctomycetales; f__Planctomycetaceae; g__Planctomyces; s__	0.00193175	0.00140856	0.00209272	0.000925628	0.000402447	0.000241468	0.000201223	0.000442692	0.00112685	0	0	8.04894e-05	0.000362202	0.00068416	0.000201223	0.000362202	0.000482936	0.000885383	0.000201223	0.000281713	0.000120734	0	0	0	4.02447e-05	0	4.02447e-05	0.00120734	0.000321958	0.00060367	0.00221346	0.000563426	0.00108661	0.00193175	0.000523181	0.00100612	0.00181101	0.0015293	0.00112685	0.000160979	0	0.000120734	0.00132807	0.000442692	0.000764649	0.000160979
OTU_12825	0.0209489	0.175385	k__Bacteria; p__Proteobacteria; c__Betaproteobacteria; o__Methylophilales; f__Methylophilaceae; g__; s__	0	0	0	0	0	4.02447e-05	0	0	0	4.02447e-05	4.02447e-05	0	0	0	0	4.02447e-05	0	0	0	4.02447e-05	0	0	0	0	0	0	0	0	0	0	0	4.02447e-05	0	0	0	0	0	4.02447e-05	0.000201223	0	0	0	4.02447e-05	0	0	0
OTU_172	0.0209489	0.175385	k__Bacteria; p__Proteobacteria; c__Alphaproteobacteria; o__Caulobacterales; f__Caulobacteraceae; g__Mycoplana; s__	0.000160979	0.000120734	4.02447e-05	0.000281713	0.000482936	0.000201223	0.000402447	0.000281713	0.000321958	0.000160979	0.000201223	0.000241468	0.000160979	0.000402447	8.04894e-05	0.000120734	0.000482936	0.000281713	0.00124759	0.0015293	0.00104636	0.000442692	0.000321958	0.000362202	0.00241468	0.0018915	0.00140856	0.000402447	0.000402447	0.00068416	0.000402447	0.000241468	0.000241468	0.000402447	0.000482936	0.000321958	0.000201223	0.000321958	0.000482936	0.000120734	0	0.000201223	0.000281713	0.000201223	0	0.000120734
OTU_20359	0.0211675	0.175014	k__Bacteria; p__Bacteroidetes; c__Sphingobacteriia; o__Sphingobacteriales; f__; g__; s__	0.00221346	0.000764649	0.00205248	0.00205248	0.00136832	0.00277688	0.00249517	0.00277688	0.0041452	0.00394398	0.00434643	0.00386349	0.00217321	0.00108661	0.00205248	0.00370251	0.00410496	0.00539279	0.000482936	0.00269639	0.00104636	0.0022537	0.00257566	0.00269639	8.04894e-05	0.000201223	0.000241468	0.00128783	0.00144881	0.00060367	0.00338055	0.00213297	0.0022537	0.00245493	0.00173052	0.00277688	0.000804894	0.000442692	0.00108661	0.00241468	0.00209272	0.0022537	0.00470863	0.0041452	0.0056745	0.00229395
OTU_118	0.0218449	0.173885	k__Bacteria; p__Bacteroidetes; c__Sphingobacteriia; o__Sphingobacteriales; f__Sphingobacteriaceae; g__; s__	0.000362202	0.000281713	0.000241468	0.000442692	0.00060367	0.000643915	0.00120734	0.000764649	0.000804894	8.04894e-05	0	8.04894e-05	0.00068416	0.000442692	0.000845138	0.000764649	0.000563426	0.000724404	0	0	4.02447e-05	8.04894e-05	8.04894e-05	8.04894e-05	0	4.02447e-05	8.04894e-05	0.000321958	0.000321958	0.000362202	0.000442692	0.000241468	0.000241468	0.000442692	0.000281713	0.000482936	0.000402447	0.000281713	0.000362202	0.000563426	0.000643915	0.000523181	0.00193175	0.00265615	0.00205248	0.00128783
OTU_12974	0.0220664	0.173524	k__Bacteria; p__Cyanobacteria; c__Chloroplast; o__Cryptophyta; f__; g__; s__	0.000885383	0.00060367	0.000804894	0.000764649	0.000201223	0.00124759	0.000523181	0.00060367	0.00060367	0.000402447	4.02447e-05	0.000241468	0.000362202	0.000201223	0.000563426	0.000925628	0.0011671	0.000804894	4.02447e-05	0	4.02447e-05	0.000965873	0.000643915	0.000643915	0	4.02447e-05	8.04894e-05	0.000845138	0.000160979	0.000442692	0.00060367	0.000241468	0.000201223	0.000281713	8.04894e-05	8.04894e-05	0.000281713	0.000643915	0.000442692	0.000482936	0.000885383	0.000643915	0.00165003	0.00104636	0.00201223	0.000321958
OTU_205	0.0221241	0.17343	k__Bacteria; p__Actinobacteria; c__Acidimicrobiia; o__Acidimicrobiales; f__C111; g__; s__	0.000563426	0.000563426	0.00132807	0.000442692	0.000523181	0.000563426	0.000482936	0.000724404	0.00104636	0	0	0	0.000241468	0.00068416	0.000643915	0.000402447	0.000764649	0.000925628	0.000201223	0.000281713	0.000201223	0.000321958	0.000523181	0.000321958	0	0	0	0.000241468	0.000523181	0.000965873	0.000321958	0.000281713	0.000201223	0.000885383	0.000442692	0.000563426	4.02447e-05	0	8.04894e-05	4.02447e-05	0	0	8.04894e-05	4.02447e-05	0	0
OTU_261	0.0223417	0.173079	k__Bacteria; p__Actinobacteria; c__Thermoleophilia; o__Gaiellales; f__; g__; s__	0.000442692	0.00177077	0.000845138	8.04894e-05	0.000241468	0.000201223	0.000281713	0.000281713	0.000885383	0	0	0	0.000321958	0.000925628	0.000442692	0.000442692	0.000482936	0.000321958	4.02447e-05	0.000120734	8.04894e-05	0.000563426	0.000442692	0.000281713	0	0	0	0.000482936	0.00068416	0.000563426	0.000321958	0.000201223	0.000201223	0.000120734	8.04894e-05	0.000281713	4.02447e-05	4.02447e-05	8.04894e-05	0	4.02447e-05	4.02447e-05	0	0	0	0
OTU_176	0.0227043	0.1725	k__Bacteria; p__Proteobacteria; c__Alphaproteobacteria; o__Rhizobiales; f__; g__; s__	0.000482936	0.000241468	0.000160979	0.00120734	0.00201223	0.00104636	0.000764649	0.000563426	0.00112685	4.02447e-05	4.02447e-05	0	0.00104636	0.000845138	0.00068416	0.000925628	0.000563426	0.000804894	8.04894e-05	0	0	4.02447e-05	0	0.000281713	4.02447e-05	0	0	0.000845138	0.00060367	0.00100612	0.000925628	0.000160979	0.000724404	0.000442692	0.000281713	0.000804894	0.000362202	0.000241468	0.000241468	4.02447e-05	0	8.04894e-05	0.000241468	0.000160979	0.000160979	0.000160979
OTU_18407	0.0234967	0.171266	k__Bacteria; p__Actinobacteria; c__Actinobacteria; o__Actinomycetales; f__ACK-M1; g__; s__	0.00499034	0.00692209	0.00712331	0.0144478	0.00977946	0.0115502	0.0191967	0.0178686	0.0106648	0.0164601	0.0236639	0.0145686	0.01481	0.00503059	0.00985995	0.0158564	0.011671	0.011671	0.00350129	0.00651964	0.00672086	0.00120734	0.00132807	0.0018915	0.00100612	0.0011671	0.00169028	0.0119929	0.00969897	0.00957824	0.021209	0.0234224	0.0149308	0.0168223	0.0219736	0.0181504	0.00442692	0.00402447	0.0041452	0.00486961	0.00325982	0.00639891	0.00330006	0.00820992	0.00784771	0.00309884
OTU_251	0.0236058	0.1711	k__Bacteria; p__Actinobacteria; c__Actinobacteria; o__Actinomycetales; f__Sporichthyaceae; g__; s__	0.000160979	8.04894e-05	0.000160979	0.000120734	0.000120734	0.000201223	0.000201223	8.04894e-05	4.02447e-05	0.000281713	0.000160979	8.04894e-05	0.000120734	0.000402447	0.000120734	0.000160979	8.04894e-05	0.000160979	0.000442692	0.000523181	0	4.02447e-05	0.000362202	0.000120734	0.00100612	0.000885383	0.00060367	0.000563426	0.000845138	0.000442692	0.000120734	0.000241468	0.000120734	0.000804894	0.00140856	0.000281713	0.000321958	0.000563426	0.000160979	0.000120734	0.000120734	0.000281713	0.00136832	0.000845138	0.000241468	0.000563426
OTU_6267	0.0241049	0.170345	k__Bacteria; p__Proteobacteria; c__Betaproteobacteria; o__Burkholderiales; f__Comamonadaceae; g__Comamonas; s__	0.00237444	0.00181101	0.00217321	0.00068416	0.000402447	0.00068416	0.000442692	0.000643915	0.000362202	0.00140856	0.00136832	0.000965873	0.00177077	0.000925628	0.00120734	0.000120734	0.000482936	0.00060367	0.0049501	0.00808918	0.00390373	0.000402447	0.000764649	0.000724404	0.000482936	0.00213297	0.00108661	0.000482936	0.00132807	0.00068416	0.000402447	0.000442692	0.00165003	0.000362202	0.000764649	0.000362202	0.000281713	0.000241468	0.000402447	0.000442692	0.000643915	0.000482936	0.000362202	0.000120734	0	0.00104636
OTU_1357	0.0245193	0.16973	k__Bacteria; p__Actinobacteria; c__Actinobacteria; o__Actinomycetales; f__Microbacteriaceae; g__Candidatus Rhodoluna; s__	0.000201223	0.000281713	0.000321958	0.000523181	0.000362202	0.000201223	0.000160979	0.000160979	0.000362202	0.013321	0.0155747	0.0132405	0.00060367	0.000160979	0.000442692	0.000402447	0.000321958	0.000321958	0.000402447	0.00068416	0.000523181	0.00454765	0.00394398	0.00346104	0.0030586	0.00177077	0.00245493	0.000241468	0.000442692	0.000764649	0.0011671	0.000563426	0.000482936	0.000523181	0.000241468	0.000724404	0.000241468	8.04894e-05	0.000201223	0.000120734	0	0.000201223	0.000120734	8.04894e-05	8.04894e-05	0.000201223
OTU_326	0.0249575	0.16909	k__Bacteria; p__Bacteroidetes; c__Flavobacteriia; o__Flavobacteriales; f__Flavobacteriaceae; g__Flavobacterium; s__	0.00128783	0.000281713	0.000402447	0.000321958	0.000160979	0.000160979	8.04894e-05	0.000241468	4.02447e-05	0.000281713	8.04894e-05	0.000241468	8.04894e-05	4.02447e-05	0	8.04894e-05	0.000160979	4.02447e-05	0.000281713	0.000281713	0.000563426	0.000362202	0.000281713	0.000402447	0.000362202	0.000120734	0.000201223	8.04894e-05	8.04894e-05	0.000321958	4.02447e-05	4.02447e-05	4.02447e-05	0.000120734	0.000402447	8.04894e-05	4.02447e-05	8.04894e-05	0	4.02447e-05	4.02447e-05	0	0	4.02447e-05	0	8.04894e-05
OTU_1706	0.0249906	0.169042	k__Bacteria; p__Proteobacteria; c__Betaproteobacteria; o__Burkholderiales; f__Comamonadaceae; g__Limnohabitans; s__	0.000845138	0.00128783	0.0011671	0.00136832	0.00068416	0.00160979	0.00112685	0.00120734	0.00104636	0.000442692	0.00112685	0.00128783	0.00160979	0.00068416	0.00160979	0.00120734	0.00156954	0.00148905	0.000523181	0.000925628	0.00112685	0.00104636	0.00104636	0.00108661	0.000241468	0.000724404	0.000321958	0.00104636	0.00100612	0.00060367	0.00132807	0.0011671	0.00104636	0.00165003	0.000965873	0.000845138	0.0011671	0.000885383	0.00148905	0.00209272	0.00197199	0.0026159	0.000885383	0.00201223	0.00209272	0.00112685
OTU_47	0.0251045	0.168878	k__Bacteria; p__Verrucomicrobia; c__Opitutae; o__[Cerasicoccales]; f__[Cerasicoccaceae]; g__; s__	0.00177077	0.00068416	0.00160979	0.0022537	0.00124759	0.00273664	0.00313909	0.00313909	0.00434643	0.00120734	0.000764649	0.0015293	0.00325982	0.00060367	0.00277688	0.00362202	0.00406471	0.00410496	0.000120734	0.000402447	0.000241468	0.00173052	0.00156954	0.000845138	0	0	0	0.00354153	0.00201223	0.00144881	0.00398422	0.00317933	0.00233419	0.00209272	0.00140856	0.00144881	0.000160979	0.000120734	0.000402447	0.000160979	8.04894e-05	0.000241468	0.00100612	0.000402447	0.00108661	0.000241468
OTU_13568	0.0251202	0.168855	k__Bacteria; p__Proteobacteria; c__Gammaproteobacteria; o__Pseudomonadales; f__Moraxellaceae; g__Acinetobacter; s__johnsonii	0	0	0	0	0.000120734	4.02447e-05	0	0	0	0	0	0	0	0.00201223	0.000160979	0	0	0	0	0	0.00108661	0	0	0	4.02447e-05	0.000643915	8.04894e-05	0.000442692	0	0	0	4.02447e-05	4.02447e-05	0.000120734	4.02447e-05	0	0	0	0	0	0	4.02447e-05	8.04894e-05	0	0	0
OTU_14217	0.0251408	0.168826	k__Bacteria; p__Proteobacteria; c__Betaproteobacteria; o__Burkholderiales; f__Comamonadaceae	0.00177077	0.00221346	0.00177077	0.000482936	0.00060367	0.000523181	0.000402447	0.000160979	0.000362202	0.00257566	0.0030586	0.0022537	0.00217321	0.00144881	0.00136832	0.000402447	0.000482936	0.000523181	0.000925628	0.00205248	0.00104636	0.00273664	0.00297811	0.00366227	0.00108661	0.00273664	0.000925628	0.000925628	0.00120734	0.000965873	0.00100612	0.00128783	0.00124759	0.000362202	0.000281713	0.00060367	0.000482936	0.000482936	0.00128783	0.00132807	0.00165003	0.00177077	0.000563426	0.000281713	0.000160979	0.00253542
OTU_119	0.0253179	0.168572	k__Bacteria; p__Bacteroidetes; c__Bacteroidia; o__Bacteroidales; f__S24-7; g__; s__	0.000965873	0.000885383	0.000764649	0.000965873	0.000845138	0.00104636	0.000804894	0.000925628	0.000965873	0.000724404	0.000845138	0.00108661	0.000523181	0.000925628	0.00060367	0.00132807	0.000885383	0.00124759	0.000201223	0.000482936	0.00060367	0.00112685	0.00060367	0.000925628	0.000643915	0.000523181	0.000523181	0.000885383	0.000643915	0.000764649	0.00112685	0.000845138	0.000925628	0.000643915	0.000885383	0.0011671	0.000482936	0.000885383	0.00060367	0.00120734	0.00108661	0.000563426	0.000724404	0.000804894	0.000925628	0.000804894
OTU_13744	0.0261104	0.167456	k__Bacteria; p__Proteobacteria; c__Betaproteobacteria; o__Burkholderiales; f__Comamonadaceae; g__; s__	0.000321958	0.00104636	0.000804894	0.000402447	0.000482936	0.000160979	8.04894e-05	0.000241468	0.000160979	0.000120734	0.000160979	0.000241468	0.000362202	0.00104636	0.000281713	0.000201223	0.000120734	0.000523181	0.0015293	0.0011671	0.00253542	0.000563426	0.000362202	0.000362202	0.000201223	0.00100612	0.000201223	0.00100612	0.00156954	0.000845138	0.000764649	0.00068416	4.02447e-05	0.00257566	0.00547328	0.00132807	0.000362202	0.000643915	0.000925628	0.000523181	0.000402447	0.000201223	0.000482936	0.000120734	0	0.00140856
OTU_20120	0.0264488	0.166989	k__Bacteria; p__Bacteroidetes; c__[Saprospirae]; o__[Saprospirales]; f__Chitinophagaceae; g__Sediminibacterium; s__	0.00446716	0.00490985	0.00458789	0.00841114	0.00672086	0.00647939	0.0101014	0.00804894	0.00664037	0.00293786	0.00390373	0.00418545	0.00881359	0.00358178	0.0107856	0.00941726	0.00812943	0.0105844	0.000925628	0.00313909	0.00269639	0.00285737	0.00321958	0.00265615	0.000643915	0.000845138	0.000885383	0.00647939	0.00668062	0.00543303	0.0102624	0.0122344	0.0107856	0.0090953	0.00933677	0.0127576	0.0018915	0.00140856	0.00213297	0.00354153	0.00354153	0.00309884	0.0026159	0.00358178	0.00245493	0.00177077
OTU_12149	0.0267024	0.166642	k__Bacteria; p__Verrucomicrobia; c__Opitutae; o__[Cerasicoccales]; f__[Cerasicoccaceae]; g__; s__	0.00068416	0.000241468	0.000402447	0.000362202	0.000442692	0.000523181	0.000643915	0.000523181	0.000482936	0.00112685	0.00160979	0.00169028	0.000362202	0.000160979	0.000482936	0.000724404	0.00068416	0.00068416	0	4.02447e-05	0	8.04894e-05	0	0.000201223	0	8.04894e-05	0	0.00060367	0.000201223	0.000160979	0.000563426	0.000845138	0.000402447	0.000201223	0.000321958	8.04894e-05	0.000321958	0.000201223	0.000241468	0.000160979	0.000120734	8.04894e-05	0.000160979	8.04894e-05	0.000201223	4.02447e-05
OTU_158	0.0275051	0.165566	k__Bacteria; p__Verrucomicrobia; c__Verrucomicrobiae; o__Verrucomicrobiales; f__Verrucomicrobiaceae; g__Luteolibacter; s__	4.02447e-05	0.000201223	8.04894e-05	0.00201223	0.00293786	0.0022537	0.000201223	0.000523181	0.0015293	4.02447e-05	0	0	0.000885383	0.00173052	0.00120734	0.000321958	0.00100612	0.00104636	0.000160979	0	0	0.000120734	0.000160979	0	0.000321958	0.000160979	0.000362202	0.00060367	0.000442692	0.00104636	0.000241468	8.04894e-05	0.000241468	0.000120734	8.04894e-05	8.04894e-05	0.000201223	0.000201223	0.000201223	0.000160979	0.000241468	0.000120734	0.000241468	4.02447e-05	0.000281713	0
OTU_223	0.0275715	0.165479	k__Bacteria; p__Proteobacteria; c__Gammaproteobacteria; o__Pseudomonadales; f__Moraxellaceae; g__Enhydrobacter; s__	0	0.000201223	8.04894e-05	0.00140856	0.0018915	0.000965873	8.04894e-05	8.04894e-05	8.04894e-05	4.02447e-05	0	4.02447e-05	0.000160979	0.000442692	0.000442692	4.02447e-05	0.000120734	0.000120734	0.000362202	0.000160979	0.00068416	0.000120734	4.02447e-05	4.02447e-05	0.000442692	0.000523181	0.000120734	4.02447e-05	4.02447e-05	8.04894e-05	4.02447e-05	0	0	0.000201223	0.000120734	0.000442692	0.000764649	0.000482936	4.02447e-05	8.04894e-05	0.000321958	0.000160979	0.000241468	0	0	0.000764649
OTU_346	0.0276289	0.165403	k__Bacteria; p__Proteobacteria; c__Betaproteobacteria; o__Rhodocyclales; f__Rhodocyclaceae; g__C39; s__	0	8.04894e-05	0	0	4.02447e-05	8.04894e-05	0	0	4.02447e-05	4.02447e-05	8.04894e-05	0	0.000402447	0.000160979	0.000845138	0	4.02447e-05	0	0	0	0	4.02447e-05	0	4.02447e-05	0	0	0.000120734	0	4.02447e-05	0	4.02447e-05	4.02447e-05	0	0	8.04894e-05	4.02447e-05	0	0	0	0	0	0	0	0	0	0
OTU_11176	0.0281142	0.164769	k__Bacteria; p__Proteobacteria; c__Gammaproteobacteria; o__Pseudomonadales; f__Pseudomonadaceae; g__Pseudomonas; s__alcaligenes	0.000241468	0.000321958	0.000120734	0.000482936	0.000321958	4.02447e-05	8.04894e-05	4.02447e-05	4.02447e-05	8.04894e-05	0.000160979	0	0.000201223	0.000482936	0.000321958	4.02447e-05	4.02447e-05	4.02447e-05	0.000925628	0.000362202	0.000845138	4.02447e-05	4.02447e-05	0	4.02447e-05	0.000120734	4.02447e-05	0.00197199	4.02447e-05	4.02447e-05	0.000241468	0.000321958	8.04894e-05	0	0.000160979	8.04894e-05	8.04894e-05	0.000402447	0.00060367	4.02447e-05	0	4.02447e-05	8.04894e-05	4.02447e-05	4.02447e-05	8.04894e-05
OTU_16753	0.0282196	0.164633	k__Bacteria; p__Proteobacteria; c__Betaproteobacteria; o__Burkholderiales; f__Comamonadaceae; g__Variovorax; s__	0.00112685	0.00148905	0.00144881	0.000402447	0.000442692	0.000482936	0.000523181	0.000442692	0.000402447	0.00136832	0.00100612	0.00124759	0.000643915	0.000442692	0.000885383	0.000241468	0.000482936	0.000442692	0.00124759	0.00209272	0.00108661	0.000321958	0.00068416	0.00108661	0.000362202	0.000482936	0.000402447	0.000643915	0.000362202	0.000523181	0.000724404	0.00060367	0.00060367	0.000482936	0.000281713	0.000241468	0.000321958	0.000402447	0.000563426	0.000885383	0.000804894	0.000563426	0.000523181	0.000321958	0.000643915	0.000925628
OTU_212	0.0296576	0.162819	k__Bacteria; p__Proteobacteria; c__Gammaproteobacteria; o__Xanthomonadales; f__Xanthomonadaceae; g__; s__	8.04894e-05	0.000160979	0	8.04894e-05	4.02447e-05	8.04894e-05	4.02447e-05	0	0	4.02447e-05	8.04894e-05	8.04894e-05	0	0	0.000160979	0.000160979	0.000160979	0.000201223	0.00281713	0.00446716	0.00213297	0	4.02447e-05	8.04894e-05	0.000201223	0.00237444	8.04894e-05	4.02447e-05	0.000160979	0.000120734	4.02447e-05	0.000160979	4.02447e-05	0.000120734	0.00386349	4.02447e-05	0	8.04894e-05	0.000120734	0	0	0	0.000160979	0	4.02447e-05	0
OTU_14016	0.0303227	0.162008	k__Bacteria; p__Proteobacteria; c__Alphaproteobacteria; o__Rhizobiales; f__Rhizobiaceae; g__Agrobacterium; s__	0.000160979	0.000281713	0.000160979	8.04894e-05	8.04894e-05	0	0	4.02447e-05	0	0.000201223	8.04894e-05	0.000160979	0	0.000321958	8.04894e-05	4.02447e-05	8.04894e-05	4.02447e-05	0.00108661	0.000241468	0.00181101	0.000120734	4.02447e-05	8.04894e-05	0.00100612	0.00108661	0.000281713	4.02447e-05	0.000201223	8.04894e-05	4.02447e-05	8.04894e-05	0.000160979	0.000160979	0.00060367	0	0.000482936	0.000201223	0.000241468	0.000120734	8.04894e-05	0.000362202	0.000523181	4.02447e-05	0	0.000241468
OTU_8052	0.0306709	0.16159	k__Bacteria; p__Proteobacteria; c__Betaproteobacteria; o__Burkholderiales; f__Alcaligenaceae; g__Pigmentiphaga; s__	4.02447e-05	4.02447e-05	0.000120734	4.02447e-05	8.04894e-05	0.000160979	0.000160979	0	0.000201223	0.000160979	0.000764649	0.00136832	0.000241468	0.000201223	0.000241468	0.000120734	0.000120734	0.000160979	0.000362202	0.000120734	0.000160979	0.000281713	0.000281713	0.000442692	8.04894e-05	0	4.02447e-05	0.000201223	0.000120734	8.04894e-05	8.04894e-05	0.000120734	4.02447e-05	0.000201223	0.000241468	8.04894e-05	8.04894e-05	0.000120734	0.000160979	0.000241468	0.000160979	4.02447e-05	8.04894e-05	4.02447e-05	4.02447e-05	0.000160979
OTU_259	0.0307128	0.16154	k__Bacteria; p__Proteobacteria; c__Gammaproteobacteria; o__Alteromonadales; f__OM60; g__; s__	8.04894e-05	0.000201223	0.000160979	0.000885383	0.00124759	0.000241468	0.000321958	0.000442692	0.000482936	4.02447e-05	4.02447e-05	0	8.04894e-05	0.000321958	0.000281713	0.000442692	0.000885383	0.000764649	0	4.02447e-05	0	0.000201223	0.000321958	0.000321958	0.000482936	0.000281713	0.00068416	0.000804894	0.000643915	0.000845138	0.000523181	0.000160979	0.000120734	8.04894e-05	0.000281713	4.02447e-05	8.04894e-05	8.04894e-05	4.02447e-05	0	0	0	8.04894e-05	0	4.02447e-05	4.02447e-05
OTU_11496	0.0308882	0.161332	k__Bacteria; p__Cyanobacteria; c__Chloroplast; o__Haptophyceae; f__; g__; s__	0	0	4.02447e-05	8.04894e-05	0.000120734	0.000120734	0.000120734	4.02447e-05	0	0	0	0	4.02447e-05	0	4.02447e-05	8.04894e-05	8.04894e-05	0	0	0	0	8.04894e-05	0	4.02447e-05	0	0	0	0.000160979	4.02447e-05	4.02447e-05	0	0	8.04894e-05	0	0	4.02447e-05	0.000160979	0	8.04894e-05	0.000724404	0.00136832	0.00112685	0.000925628	0.000563426	0.000885383	0.000281713
OTU_20266	0.0311601	0.16101	k__Bacteria; p__Bacteroidetes; c__Cytophagia; o__Cytophagales; f__Cyclobacteriaceae; g__; s__	0.00833065	0.00833065	0.0087331	0.00853187	0.00651964	0.00913554	0.0119124	0.0130795	0.0114697	0.013482	0.0152125	0.0191162	0.0138039	0.00370251	0.0141661	0.0150113	0.0134417	0.0163393	0.000563426	0.00422569	0.00169028	0.00148905	0.00165003	0.00181101	0.000523181	0.000925628	0.000563426	0.0122344	0.0060367	0.0056745	0.0133612	0.0117917	0.0147296	0.0111075	0.00917579	0.011349	0.00454765	0.00450741	0.00583548	0.0260383	0.0279298	0.0252334	0.00925628	0.0121941	0.0101819	0.0079282
OTU_13408	0.0313786	0.160754	k__Bacteria; p__Proteobacteria; c__Alphaproteobacteria; o__Sphingomonadales; f__; g__; s__	0.000362202	0.000482936	0.000804894	0.000321958	0.000482936	0.000201223	0.000321958	0.000241468	0.000120734	0.000442692	0.000241468	0.000321958	8.04894e-05	4.02447e-05	0.000201223	0.000160979	0.000241468	0.000402447	0.000362202	0.000442692	0.000442692	8.04894e-05	0.000120734	0.000201223	0.000965873	0.000241468	0.00144881	0.000160979	0.000442692	0.000402447	0.000160979	0.000120734	0	4.02447e-05	8.04894e-05	0	0.000201223	0.000120734	0.000160979	8.04894e-05	8.04894e-05	0.000241468	0.000201223	4.02447e-05	0.000120734	8.04894e-05
OTU_195	0.0320064	0.160027	k__Bacteria; p__Proteobacteria; c__Deltaproteobacteria; o__Spirobacillales; f__; g__; s__	0	4.02447e-05	0	0.00068416	0.00104636	0.00120734	0.000362202	0.000241468	0.000965873	0	0	4.02447e-05	0.000201223	0.000925628	0.000442692	0.000241468	0.000362202	0.000563426	4.02447e-05	0	4.02447e-05	0	0	4.02447e-05	0	0	0	0.000402447	0.000804894	0.00124759	0.000563426	0.000281713	0.0011671	0.00128783	0.000523181	0.00132807	0.000523181	0.00068416	0.000482936	4.02447e-05	8.04894e-05	0.000241468	0.000885383	0.000482936	0.000482936	0.000120734
OTU_19888	0.0321814	0.159827	k__Bacteria; p__Bacteroidetes; c__Flavobacteriia; o__Flavobacteriales; f__Flavobacteriaceae; g__Flavobacterium; s__	0.000402447	8.04894e-05	0.000160979	0.000201223	0.000160979	0.000201223	0.000120734	0.000120734	8.04894e-05	0.00060367	0.000321958	0.000563426	8.04894e-05	8.04894e-05	0.000120734	0.000201223	8.04894e-05	0.000160979	0.000120734	0.000120734	0.000321958	0.000965873	0.00108661	0.00136832	0.000402447	0.000160979	0.000482936	0.000160979	0.000321958	0.000160979	0.000442692	0.000160979	8.04894e-05	4.02447e-05	0.000201223	0.000120734	0.000120734	4.02447e-05	8.04894e-05	8.04894e-05	0.000120734	0.000160979	0.000241468	0.000120734	0.000241468	0.000402447
OTU_129	0.0323448	0.159641	k__Bacteria; p__Proteobacteria; c__Alphaproteobacteria; o__Caulobacterales; f__Caulobacteraceae; g__Phenylobacterium; s__	0.00068416	0.000804894	0.00100612	0.000402447	0.000804894	0.00068416	0.000523181	0.000362202	0.00060367	0.000724404	0.000442692	0.000402447	0.000724404	0.000845138	0.00112685	0.000563426	0.000523181	0.000442692	0.00100612	0.000925628	0.000925628	0.000845138	0.000523181	0.000643915	0.00100612	0.000925628	0.00108661	0.00068416	0.000442692	0.000362202	0.000321958	0.000523181	0.000482936	0.000804894	0.000764649	0.000241468	0.000724404	0.000845138	0.000482936	0.000321958	0.000362202	0.000563426	0.000482936	0.000442692	0.000241468	0.00060367
OTU_7817	0.0327255	0.159211	k__Bacteria; p__Proteobacteria; c__Betaproteobacteria; o__Burkholderiales; f__Comamonadaceae; g__; s__	8.04894e-05	4.02447e-05	4.02447e-05	0.000160979	0.000160979	0.000160979	8.04894e-05	0	0	0	0	0	0	0.000120734	0.000160979	8.04894e-05	8.04894e-05	4.02447e-05	0.00068416	0.00104636	0.000442692	4.02447e-05	0.000160979	4.02447e-05	4.02447e-05	0.000201223	8.04894e-05	0.000120734	0.000120734	8.04894e-05	8.04894e-05	0.000160979	0	0	4.02447e-05	8.04894e-05	0	0	0	0	4.02447e-05	0	0	0	0	0
OTU_62	0.0335388	0.158307	k__Bacteria; p__Proteobacteria; c__Gammaproteobacteria; o__Pseudomonadales; f__Pseudomonadaceae; g__Pseudomonas	0.00120734	0.0015293	0.00104636	0.00112685	0.000724404	0.00120734	0.00120734	0.00128783	0.00104636	0.00156954	0.00173052	0.00120734	0.00128783	0.00144881	0.0015293	0.000885383	0.00144881	0.000885383	0.00209272	0.00173052	0.00217321	0.00136832	0.000845138	0.00136832	0.000764649	0.0015293	0.00108661	0.00124759	0.00148905	0.00120734	0.000643915	0.00104636	0.00144881	0.00140856	0.00148905	0.00140856	0.000804894	0.000845138	0.00108661	0.00104636	0.00112685	0.0015293	0.000482936	0.00108661	0.00112685	0.00104636
OTU_241	0.0340168	0.157785	k__Bacteria; p__Proteobacteria; c__Alphaproteobacteria; o__Rhizobiales	0.000482936	0.000442692	0.000201223	0.000201223	0.000563426	0.000281713	0.000281713	4.02447e-05	0.000362202	0.000201223	0.000201223	0.000241468	0.000362202	0.000281713	0.000321958	0.000321958	0.000362202	0.000241468	0.00060367	0.000201223	0.000321958	0.000442692	0.000321958	0.000362202	0.000845138	0.00112685	0.000965873	0.000201223	0.000321958	0.000362202	0.000321958	0.000321958	0.000321958	0.000321958	0.000362202	8.04894e-05	0.000201223	0.000362202	0.000201223	0.000281713	0.000321958	0.000321958	0.000201223	0.000281713	0.000321958	0.000241468
OTU_61	0.0343624	0.157412	k__Bacteria; p__Cyanobacteria; c__Chloroplast; o__Haptophyceae; f__; g__; s__	0.000241468	0.000281713	0.000201223	0.00112685	0.00068416	0.00173052	0.000965873	0.000885383	0.0015293	8.04894e-05	0	4.02447e-05	0.000482936	0.000201223	0.000362202	0.00136832	0.00173052	0.00104636	0	0	0	0.000643915	0.00108661	0.000402447	0	4.02447e-05	0	0.000845138	0.00128783	0.000764649	0.0011671	0.000362202	0.000281713	0.000442692	8.04894e-05	0.00060367	0.00165003	0.00120734	0.00140856	0.0120734	0.0188345	0.0131198	0.0101819	0.00941726	0.00788796	0.00100612
OTU_15307	0.0344182	0.157353	k__Bacteria; p__Proteobacteria; c__Betaproteobacteria; o__Burkholderiales; f__Comamonadaceae; g__Methylibium; s__	8.04894e-05	0.000201223	0.000402447	0	0.000321958	0.000321958	0.000241468	0.000120734	4.02447e-05	0.000241468	0.000120734	0.000120734	0.000201223	0.000321958	0.000201223	0.000160979	0.000160979	0.000362202	0.000120734	0.000321958	0.000120734	0.000362202	0.000402447	0.000523181	8.04894e-05	0.000160979	0.000120734	0.000643915	0.000281713	0.000201223	0.000120734	0.000160979	0.000321958	0.000241468	0.000845138	0.000362202	0.00209272	0.00124759	0.000201223	0.000764649	0.000201223	0.000523181	0.000120734	0.0018915	4.02447e-05	0.00253542
OTU_279	0.03484	0.156903	k__Bacteria; p__Proteobacteria; c__Betaproteobacteria; o__Rhodocyclales; f__Rhodocyclaceae; g__Methyloversatilis; s__	0	0	0	0.000321958	0.000160979	0	0.000160979	4.02447e-05	4.02447e-05	0	4.02447e-05	4.02447e-05	0.000120734	0	4.02447e-05	0	0.000120734	4.02447e-05	0	4.02447e-05	4.02447e-05	0	4.02447e-05	0	0	4.02447e-05	4.02447e-05	8.04894e-05	4.02447e-05	0	4.02447e-05	0	0	4.02447e-05	8.04894e-05	4.02447e-05	0.000160979	0.000120734	8.04894e-05	0	4.02447e-05	8.04894e-05	4.02447e-05	0	0	4.02447e-05
OTU_183	0.0351042	0.156624	k__Bacteria; p__Proteobacteria; c__Alphaproteobacteria; o__Caulobacterales; f__Caulobacteraceae; g__Arthrospira; s__	0.000201223	0.000201223	0.000160979	0.000241468	0.000281713	8.04894e-05	0.000321958	8.04894e-05	0.000160979	4.02447e-05	0	4.02447e-05	8.04894e-05	0.000241468	0.000120734	0.000120734	0.000120734	8.04894e-05	0.0015293	0.0034208	0.00144881	0.000281713	0.000321958	0.000362202	0.000724404	0.00285737	0.000925628	0.000120734	0.000442692	0.000402447	0.000321958	0.000201223	0.000241468	0.000442692	0.000563426	0.000362202	0.000442692	0.000482936	0.000362202	8.04894e-05	0.000281713	8.04894e-05	0.000160979	0	4.02447e-05	0.000241468
OTU_17781	0.0352945	0.156424	k__Bacteria; p__Actinobacteria; c__Actinobacteria; o__Actinomycetales; f__ACK-M1; g__; s__	0.0103429	0.0103429	0.00800869	0.0206858	0.0140052	0.0173455	0.0288152	0.0284127	0.0161784	0.0246297	0.0350934	0.0251529	0.0181101	0.00619768	0.015293	0.0279298	0.0198004	0.0147698	0.00511108	0.00825016	0.00784771	0.00281713	0.00217321	0.00249517	0.00205248	0.00140856	0.00205248	0.0155344	0.0125966	0.018915	0.0274066	0.0321153	0.0206455	0.0244688	0.0260383	0.0290567	0.00889408	0.00676111	0.00627817	0.00716355	0.00547328	0.00752576	0.00563426	0.0122344	0.00921603	0.003783
OTU_79	0.0354043	0.156309	k__Bacteria; p__Proteobacteria; c__Alphaproteobacteria; o__Rhizobiales; f__Rhizobiaceae; g__Agrobacterium; s__	0.000442692	0.000442692	0.000563426	0.000201223	0.000160979	4.02447e-05	4.02447e-05	4.02447e-05	8.04894e-05	0.000321958	0.000321958	0.000523181	0.000241468	0.00120734	0.000120734	8.04894e-05	0.000160979	0.000201223	0.00591597	0.0015293	0.00998068	0.000563426	0.000201223	8.04894e-05	0.00104636	0.00434643	0.000281713	0.000241468	0.000925628	0.000201223	0.000201223	0.000241468	0.000442692	0.000804894	0.000281713	0	0.00128783	0.00120734	0.00060367	0.000925628	0.000523181	0.000925628	0.000442692	8.04894e-05	8.04894e-05	0.00136832
OTU_263	0.0354702	0.156241	k__Bacteria; p__Proteobacteria; c__Alphaproteobacteria; o__Rhodobacterales; f__Rhodobacteraceae	0.000281713	0.000160979	0.000160979	0.000241468	0.00112685	0.000402447	0.000201223	0.000201223	0.000120734	8.04894e-05	0	0	8.04894e-05	0.000482936	8.04894e-05	0.000120734	0.000120734	0.000362202	0.000120734	0.000201223	8.04894e-05	0.000281713	0.000281713	0.000120734	0.00108661	0.000764649	0.000402447	0.000160979	0.000281713	0.000643915	0.000120734	0.000120734	0.000120734	4.02447e-05	0.000241468	4.02447e-05	0.000120734	0.000120734	0.000120734	0	0	0	4.02447e-05	0	0	0
OTU_127	0.0359517	0.155742	k__Bacteria; p__Proteobacteria; c__Gammaproteobacteria; o__Xanthomonadales; f__Sinobacteraceae; g__; s__	0.000482936	0.00060367	0.000442692	0.000885383	0.000724404	0.00132807	0.00177077	0.00140856	0.00112685	0.000160979	0	0	0.00124759	0.000201223	0.000523181	0.000965873	0.00128783	0.000804894	0.000160979	0.000362202	0	4.02447e-05	0	0.000241468	4.02447e-05	0.000160979	8.04894e-05	0.00060367	0.000845138	0.00104636	0.00128783	0.00128783	0.00108661	0.00120734	0.00124759	0.00112685	0.00156954	0.000925628	0.0015293	0.0015293	0.00132807	0.000845138	0.000965873	0.00148905	0.00156954	0.00060367
OTU_10325	0.0368156	0.154862	k__Bacteria; p__Proteobacteria; c__Betaproteobacteria; o__Burkholderiales; f__Oxalobacteraceae; g__Polynucleobacter; s__	8.04894e-05	4.02447e-05	0.000160979	0.000281713	0.000281713	0.000563426	0.000241468	0.000523181	0.000241468	0.000925628	0.00132807	0.000724404	0.000241468	0.000241468	0.000281713	0.000160979	0.000281713	0.000281713	0	8.04894e-05	8.04894e-05	0.000160979	0.000241468	0.000160979	4.02447e-05	0.000120734	0.000160979	0.000201223	0.000120734	0.000281713	0.000442692	0.000241468	0.000160979	8.04894e-05	0.000160979	0.000241468	0	0	0	8.04894e-05	8.04894e-05	0	4.02447e-05	8.04894e-05	0	0.000120734
OTU_173	0.0372805	0.154397	k__Bacteria; p__Planctomycetes; c__Planctomycetia; o__Gemmatales; f__Isosphaeraceae; g__; s__	0.00120734	0.00169028	0.00185126	4.02447e-05	0.000160979	0.000321958	8.04894e-05	0.000201223	0.000643915	4.02447e-05	0.000120734	0.000120734	0	0.000160979	0.000160979	4.02447e-05	0.000362202	0.000281713	0.000120734	0.000402447	0	0.000563426	0.00068416	0.000281713	0.00173052	0.000845138	0.0015293	0.000120734	0.000120734	0.000201223	0.000160979	4.02447e-05	0.000201223	0.000120734	8.04894e-05	4.02447e-05	0.000241468	0.000281713	0.000160979	0	4.02447e-05	0	0.000160979	4.02447e-05	0.000160979	0
OTU_403	0.0386816	0.153026	k__Bacteria; p__Firmicutes; c__Clostridia; o__Clostridiales; f__Peptostreptococcaceae; g__; s__	0	0	8.04894e-05	0	0	0	8.04894e-05	0	0	0	0	4.02447e-05	4.02447e-05	8.04894e-05	4.02447e-05	4.02447e-05	0.000120734	4.02447e-05	8.04894e-05	4.02447e-05	0	0.000160979	0.000120734	4.02447e-05	0.00060367	0.000724404	0.00100612	8.04894e-05	8.04894e-05	0	0	0	0	0	4.02447e-05	8.04894e-05	0.000160979	0.000160979	0.00193175	8.04894e-05	4.02447e-05	0	0.000281713	0	0.000160979	4.02447e-05
OTU_168	0.0389319	0.152786	k__Bacteria; p__Actinobacteria; c__Actinobacteria; o__Actinomycetales; f__; g__; s__	0.000724404	0.000724404	0.00060367	0.000402447	0.00156954	0.00144881	0.000724404	0.00068416	0.00181101	4.02447e-05	4.02447e-05	0	0.000362202	0.000925628	0.000523181	0.000764649	0.000804894	0.000965873	0.00120734	0.00205248	0.000402447	0.000201223	0.000281713	0.000201223	8.04894e-05	8.04894e-05	0.000241468	0.000442692	0.00112685	0.000563426	0.000523181	0.000321958	0.000160979	0.000442692	0.000241468	0.000281713	8.04894e-05	0.000321958	0.000120734	0	8.04894e-05	0	0.000402447	0.000402447	0.000724404	8.04894e-05
OTU_18243	0.0389801	0.15274	k__Bacteria; p__Proteobacteria; c__Gammaproteobacteria; o__Xanthomonadales; f__Xanthomonadaceae; g__; s__	8.04894e-05	0.000482936	0.000160979	0.00060367	0.0015293	0.000764649	0.000241468	0.000402447	0.00068416	0.000120734	0	4.02447e-05	0.000201223	0.000160979	0.000201223	0.000402447	0.000362202	0.000804894	0.000120734	0.000120734	0.000120734	0.000402447	0.000321958	0.000321958	0.000563426	0.000402447	0.000925628	0.000764649	0.00108661	0.000885383	0.000402447	0.000201223	4.02447e-05	0.000281713	0.000643915	0.000120734	8.04894e-05	0.000120734	0.000281713	0	4.02447e-05	0	8.04894e-05	4.02447e-05	0	0.000160979
OTU_294	0.0393653	0.152374	k__Bacteria; p__Verrucomicrobia; c__Verrucomicrobiae; o__Verrucomicrobiales; f__Verrucomicrobiaceae; g__; s__	0.00068416	0.000402447	0.000764649	0	8.04894e-05	0.000281713	0	0	4.02447e-05	0.000482936	0.000120734	0.000281713	0	0.000160979	0	0	8.04894e-05	8.04894e-05	0.000241468	0.000241468	4.02447e-05	4.02447e-05	0	0	0.00193175	0.00120734	0.00209272	4.02447e-05	8.04894e-05	0.000442692	0	0	0	8.04894e-05	4.02447e-05	4.02447e-05	0	0	0	0	0	0	0	0	0	0
OTU_289	0.0396011	0.152152	k__Bacteria; p__Proteobacteria; c__Betaproteobacteria; o__Neisseriales; f__Neisseriaceae; g__Aquaspirillum; s__serpens	0.000281713	0.000482936	0.000281713	0.000120734	0.000281713	0.000120734	0.000160979	8.04894e-05	0.000120734	8.04894e-05	4.02447e-05	4.02447e-05	0.000241468	0.000201223	0.000563426	0.000160979	4.02447e-05	4.02447e-05	0.00177077	0.00193175	0.00136832	0.000120734	8.04894e-05	0.000120734	4.02447e-05	4.02447e-05	4.02447e-05	0.000120734	0.000120734	4.02447e-05	8.04894e-05	8.04894e-05	8.04894e-05	4.02447e-05	0	0.000120734	4.02447e-05	0	0	8.04894e-05	0	8.04894e-05	8.04894e-05	4.02447e-05	0	0.000482936
OTU_295	0.0400186	0.151761	k__Bacteria; p__Chloroflexi; c__Chloroflexi; o__Herpetosiphonales; f__; g__; s__	4.02447e-05	4.02447e-05	8.04894e-05	0.000241468	0.000160979	8.04894e-05	0	0	0	0.000241468	0.000201223	0.000160979	0	0.000160979	0	0.000120734	0	0.000160979	0.000925628	0.00068416	0.000160979	4.02447e-05	8.04894e-05	0.000241468	0.000563426	0.00140856	0.000845138	4.02447e-05	0.00060367	0.000321958	8.04894e-05	4.02447e-05	8.04894e-05	0.000201223	0.00060367	0.000201223	0.000201223	0	4.02447e-05	0.000120734	0.000120734	0.000281713	0.00068416	0.000160979	0.000120734	4.02447e-05
OTU_13103	0.0400256	0.151755	k__Bacteria; p__Proteobacteria; c__Alphaproteobacteria; o__Sphingomonadales; f__Sphingomonadaceae; g__Novosphingobium; s__	0.000321958	0.000523181	0.000402447	0.000402447	0.00112685	0.000724404	0.000362202	0.000321958	0.00060367	0.000362202	0.000201223	0.00060367	0.000523181	0.000804894	0.000523181	0.000482936	0.000643915	0.000523181	0.000281713	0.000764649	0.000201223	0.000764649	0.000523181	0.000362202	0.00301835	0.00173052	0.00201223	0.000724404	0.00136832	0.0018915	0.000482936	0.000724404	0.000442692	0.000523181	0.000402447	0.000281713	0.000201223	0.000523181	0.000523181	0.000281713	0.000160979	0.000120734	8.04894e-05	0.000120734	4.02447e-05	0.000482936
OTU_69	0.0400773	0.151706	k__Bacteria; p__Bacteroidetes; c__[Saprospirae]; o__[Saprospirales]; f__Saprospiraceae; g__Aquirestis; s__calciphila	0.000482936	0.000643915	0.000925628	0.00277688	0.00221346	0.00253542	0.0011671	0.0015293	0.00209272	0.000321958	0.000160979	0.000402447	0.00140856	0.000965873	0.00181101	0.00128783	0.00165003	0.00181101	0.000281713	0.000724404	8.04894e-05	0.000724404	0.000724404	0.000845138	0.000281713	0.000321958	0.000120734	0.00193175	0.00233419	0.00197199	0.00209272	0.00169028	0.00165003	0.00132807	0.000885383	0.00140856	0.00156954	0.00104636	0.000925628	0.00060367	0.000724404	0.000402447	0.000563426	0.000442692	0.000523181	8.04894e-05
OTU_2706	0.0407914	0.151048	k__Bacteria; p__Actinobacteria; c__Acidimicrobiia; o__Acidimicrobiales; f__C111; g__; s__	0.000281713	0.000402447	0.000563426	8.04894e-05	0.000160979	0.000160979	0	0.000160979	8.04894e-05	0.000643915	0.000482936	0.00104636	0	0.000160979	0.000160979	8.04894e-05	0.000120734	4.02447e-05	0.000160979	0.000724404	0.000120734	0.000321958	4.02447e-05	8.04894e-05	8.04894e-05	0.000120734	8.04894e-05	4.02447e-05	4.02447e-05	0.000160979	0.000120734	4.02447e-05	0	4.02447e-05	0	0.000120734	0	0	0	4.02447e-05	0	0	4.02447e-05	0	0	0.000120734
OTU_192	0.0416518	0.150268	k__Bacteria; p__Proteobacteria; c__Alphaproteobacteria; o__Ellin329; f__; g__; s__	0.000241468	0.000120734	0.000201223	4.02447e-05	0.000160979	4.02447e-05	0.000281713	0.000120734	0.000241468	4.02447e-05	0	4.02447e-05	0.000281713	8.04894e-05	0.000120734	0.000201223	8.04894e-05	0.000241468	8.04894e-05	4.02447e-05	4.02447e-05	0	4.02447e-05	0	0	0	4.02447e-05	0	4.02447e-05	8.04894e-05	0.000523181	0.000764649	0.000362202	0.000845138	0.00060367	0.000482936	0.00060367	0.000482936	0.000321958	0.000120734	8.04894e-05	0.000120734	0.000160979	0.000563426	0.000563426	0.000160979
OTU_96	0.0418622	0.15008	k__Bacteria; p__Bacteroidetes; c__Flavobacteriia; o__Flavobacteriales; f__Cryomorphaceae; g__Fluviicola; s__	0.000523181	0.000120734	4.02447e-05	0.000965873	0.000804894	0.00132807	0.000925628	0.000724404	0.00060367	0.000201223	0.000241468	0.000321958	0.000523181	0.000160979	0.000321958	0.000965873	0.000804894	0.000724404	4.02447e-05	4.02447e-05	0.000160979	4.02447e-05	0.000201223	0.000120734	4.02447e-05	0	0	0.000241468	0.000321958	0.000241468	0.000643915	0.000402447	0.000321958	0.000402447	0.000241468	0.000201223	0.000724404	0.000523181	0.00068416	0.00845138	0.0101014	0.00833065	0.00611719	0.00503059	0.00587572	0.000523181
OTU_125	0.0422228	0.149759	k__Bacteria; p__Actinobacteria; c__Acidimicrobiia; o__Acidimicrobiales; f__EB1017; g__; s__	0.00197199	0.00221346	0.00229395	0.00108661	0.00265615	0.00265615	0.000925628	0.000925628	0.00398422	0	0	0	0.000563426	0.00108661	0.00140856	0.000885383	0.00136832	0.00136832	8.04894e-05	8.04894e-05	0	0	0	0	0.000120734	4.02447e-05	4.02447e-05	0.00128783	0.00148905	0.00156954	0.000402447	0.000201223	0.000321958	0.000321958	0.00060367	0.000362202	0.00281713	0.0030586	0.00201223	0	0.000120734	0	0.000241468	0.000321958	0.000160979	4.02447e-05
OTU_16866	0.0428738	0.149186	k__Bacteria; p__Proteobacteria; c__Betaproteobacteria; o__Burkholderiales; f__Comamonadaceae	0.00148905	0.00193175	0.00148905	0.000845138	0.000362202	0.000965873	0.000523181	0.000402447	0.000442692	0.000523181	0.00060367	0.00060367	0.00060367	0.00108661	0.000482936	0.000201223	0.000241468	0.00068416	0.000643915	0.000643915	0.00128783	0.00100612	0.000724404	0.00140856	0.000241468	0.000523181	0.000362202	0.000362202	0.000402447	0.000321958	0.000523181	0.000402447	0.000523181	0.000160979	0.000321958	0.000160979	0.000442692	8.04894e-05	0.000241468	0.00068416	0.000563426	0.000402447	0.000201223	0.000241468	0.000120734	0.00124759
OTU_594	0.04288	0.149181	k__Bacteria; p__Proteobacteria; c__Alphaproteobacteria; o__Rhodobacterales; f__Rhodobacteraceae; g__Rhodobacter; s__	0.000523181	0.000643915	0.000643915	0.00124759	0.00156954	0.000925628	0.000885383	0.00124759	0.00124759	0.00068416	0.000321958	0.000201223	0.000523181	0.000281713	0.000925628	0.000482936	0.000925628	0.000643915	0.000321958	0.000321958	4.02447e-05	0.000201223	0.000201223	8.04894e-05	0.000321958	0.000804894	0.000563426	0.000482936	0.000482936	0.000201223	0.00060367	0.000442692	0.000201223	0.000241468	0.000442692	0.000724404	0	0.000120734	0.000160979	8.04894e-05	4.02447e-05	8.04894e-05	8.04894e-05	4.02447e-05	4.02447e-05	8.04894e-05
OTU_20165	0.0433197	0.148798	k__Bacteria; p__Bacteroidetes; c__Cytophagia; o__Cytophagales; f__Cyclobacteriaceae; g__; s__	0.0161381	0.00784771	0.0111075	0.00764649	0.00587572	0.0103026	0.01316	0.0135625	0.0114295	0.0252334	0.0203638	0.0263603	0.0134417	0.00370251	0.0141259	0.0194784	0.0175467	0.0155344	0.000442692	0.00446716	0.00156954	0.00177077	0.00253542	0.00233419	0.000764649	0.00120734	0.000402447	0.0124759	0.00740502	0.0072038	0.0135222	0.0121539	0.0155344	0.0105441	0.00808918	0.00957824	0.00877334	0.00583548	0.00571475	0.0251127	0.0339665	0.0220138	0.0101014	0.0128381	0.0105039	0.00796845
OTU_13067	0.0439579	0.14825	k__Bacteria; p__Proteobacteria; c__Gammaproteobacteria; o__Pseudomonadales; f__Moraxellaceae; g__Acinetobacter; s__johnsonii	4.02447e-05	0.000120734	4.02447e-05	4.02447e-05	8.04894e-05	4.02447e-05	4.02447e-05	0	0	0	0	4.02447e-05	8.04894e-05	0.00551352	0.000563426	0	0	4.02447e-05	0.000160979	0	0.00382325	0	4.02447e-05	0	0.000241468	0.000120734	0.000201223	0.000804894	0	0	0	4.02447e-05	4.02447e-05	0.000120734	8.04894e-05	0.000120734	0	0	4.02447e-05	8.04894e-05	4.02447e-05	8.04894e-05	0.000402447	0	0	4.02447e-05
OTU_11727	0.0441609	0.148077	k__Bacteria; p__Actinobacteria; c__Actinobacteria; o__Actinomycetales; f__Nocardioidaceae; g__Nocardioides; s__furvisabuli	8.04894e-05	0	8.04894e-05	0.000120734	0.000120734	8.04894e-05	4.02447e-05	0.000120734	0.000160979	0.000120734	0	4.02447e-05	0.000160979	0.000321958	0.000120734	0	0.000241468	0.000321958	0.000281713	0.000321958	0.000201223	8.04894e-05	8.04894e-05	0.000120734	0.00213297	0.00181101	0.0015293	0.000402447	0.00104636	0.000281713	8.04894e-05	0.000201223	0.000201223	0.000724404	0.000160979	0.000442692	0.00060367	0.0011671	0.000643915	0.000362202	0.000120734	0.000120734	0.00132807	0.000321958	0.000201223	0.000281713
OTU_297	0.0451483	0.147246	k__Bacteria; p__Proteobacteria; c__Alphaproteobacteria; o__Rhizobiales; f__; g__; s__	0	8.04894e-05	0.000201223	0.000201223	0.000321958	0.000120734	0.000160979	8.04894e-05	0.000160979	8.04894e-05	4.02447e-05	4.02447e-05	4.02447e-05	0.000160979	4.02447e-05	0.000120734	0.000321958	0.000442692	0.000201223	8.04894e-05	4.02447e-05	8.04894e-05	0.000120734	4.02447e-05	0.0011671	0.00136832	0.00165003	0.000523181	0.000885383	0.000764649	0.000281713	8.04894e-05	0.000201223	0.000241468	0.000321958	4.02447e-05	4.02447e-05	0.000241468	0.000321958	0	0	4.02447e-05	0.000120734	4.02447e-05	8.04894e-05	0
OTU_437	0.0471418	0.14562	k__Bacteria; p__Proteobacteria; c__Alphaproteobacteria; o__Sphingomonadales; f__Sphingomonadaceae	0	8.04894e-05	4.02447e-05	0.000442692	0.00128783	0.000362202	8.04894e-05	0.000120734	0.000160979	4.02447e-05	0	0	0	0	4.02447e-05	0.000120734	0.000120734	8.04894e-05	0.000201223	0.000241468	4.02447e-05	0	0	8.04894e-05	0.000201223	0.000160979	0.000321958	8.04894e-05	8.04894e-05	0.000201223	4.02447e-05	0	0	4.02447e-05	0	4.02447e-05	0	4.02447e-05	0	0	4.02447e-05	0	4.02447e-05	0	0	0
OTU_19609	0.0472623	0.145524	k__Bacteria; p__Bacteroidetes; c__Flavobacteriia; o__Flavobacteriales; f__Flavobacteriaceae; g__Flavobacterium; s__succinicans	0.000120734	8.04894e-05	8.04894e-05	4.02447e-05	0	0	8.04894e-05	0	0	0	8.04894e-05	0	4.02447e-05	8.04894e-05	0.000160979	4.02447e-05	4.02447e-05	0	0	0	8.04894e-05	0.00060367	0.00124759	0.00124759	8.04894e-05	0.000160979	0	8.04894e-05	0	0.000120734	0.000120734	4.02447e-05	4.02447e-05	0	4.02447e-05	4.02447e-05	0	4.02447e-05	0	0.000120734	0.000120734	4.02447e-05	4.02447e-05	0.000281713	4.02447e-05	4.02447e-05
OTU_20541	0.0484458	0.14459	k__Bacteria; p__Proteobacteria; c__Betaproteobacteria; o__Burkholderiales; f__Comamonadaceae; g__Rhodoferax; s__	0.00289762	0.00583548	0.00257566	0.00144881	0.00140856	0.00068416	0.000402447	0.000523181	0.000523181	0.00257566	0.00265615	0.00309884	0.00949775	0.0179089	0.00430618	0.00060367	0.000563426	0.0015293	0.0170637	0.0102222	0.00849163	0.00969897	0.00820992	0.00583548	0.00120734	0.0041452	0.00140856	0.00676111	0.0120332	0.00816967	0.00627817	0.00607695	0.00265615	0.00623793	0.00140856	0.00313909	0.00265615	0.00321958	0.00953799	0.00752576	0.00672086	0.00881359	0.00265615	0.00060367	0.000201223	0.0174662
OTU_1030	0.048521	0.144532	k__Bacteria; p__Proteobacteria; c__Betaproteobacteria; o__Burkholderiales; f__Oxalobacteraceae; g__Polynucleobacter; s__	0.000482936	0.00060367	0.000281713	0.00108661	0.0011671	0.000764649	0.00068416	0.00124759	0.000925628	0.00430618	0.00507083	0.00398422	0.000885383	0.00068416	0.00108661	0.000925628	0.00060367	0.000764649	0.000160979	0.000241468	0.000120734	0.000523181	0.000523181	0.000523181	0.000241468	0.000402447	0.000362202	0.00100612	0.00124759	0.00068416	0.00104636	0.00112685	0.000804894	0.000885383	0.00100612	0.00112685	0.000120734	0.000120734	0.000281713	0.000281713	0.000523181	0.000804894	0.000160979	0.000362202	0.000442692	0.000160979
OTU_20650	0.0485981	0.144472	k__Bacteria; p__Proteobacteria; c__Betaproteobacteria; o__Burkholderiales; f__Comamonadaceae; g__Comamonas; s__	0.000281713	0.000643915	0.00060367	0.000281713	0.000442692	0.000201223	0.000120734	0.000241468	4.02447e-05	0.000402447	0.000442692	0.000402447	0.000643915	0.00112685	0.000724404	0	8.04894e-05	0.000160979	0.00229395	0.000845138	0.00321958	0.000160979	0.000321958	0.000241468	0.000201223	0.000160979	8.04894e-05	0.000402447	0.00068416	0.000201223	0.000281713	0.000160979	8.04894e-05	0.000321958	0.000281713	0.000120734	0.000120734	8.04894e-05	0.000402447	0.000160979	0.000321958	0.000241468	0.000201223	4.02447e-05	8.04894e-05	0.000724404
OTU_7773	0.049231	0.143982	k__Bacteria; p__Proteobacteria; c__Alphaproteobacteria; o__Sphingomonadales; f__; g__; s__	0.000120734	0.000160979	0.000201223	0.000362202	0.000442692	0.000281713	0.000241468	0.000241468	0.000241468	4.02447e-05	4.02447e-05	0	0.000201223	0.000563426	0.000321958	0.000201223	0.000241468	0.000201223	0.000120734	0.000120734	8.04894e-05	0.000362202	0.000442692	0.000201223	0.00104636	0.000965873	0.00100612	0.000120734	0.000281713	0.000643915	0.000402447	0.000523181	0.000402447	0.000241468	0.000160979	0.000241468	0	4.02447e-05	0.000201223	4.02447e-05	0.000120734	0	0	0	0	0
OTU_353	0.0493172	0.143916	k__Bacteria; p__Bacteroidetes; c__[Saprospirae]; o__[Saprospirales]; f__Chitinophagaceae; g__Parasegitibacter; s__luojiensis	0	0.000120734	0	4.02447e-05	0.000160979	0.000120734	0.000120734	4.02447e-05	0.000201223	4.02447e-05	4.02447e-05	0.000160979	8.04894e-05	0.000160979	0.000120734	8.04894e-05	0.000120734	0.000120734	0.000523181	0.00108661	0.000764649	0.000160979	8.04894e-05	0.000160979	0.00060367	0.000281713	0.000442692	4.02447e-05	0.000160979	0.000120734	0.000120734	8.04894e-05	0.000120734	8.04894e-05	0.000241468	8.04894e-05	0.000241468	0.000160979	8.04894e-05	4.02447e-05	0	8.04894e-05	4.02447e-05	0.000120734	0.000160979	4.02447e-05
[truncated: 8 more columns]
